# Supplementary material
Source: publisher figshare collection journal article supplement (https://gsajournals.figshare.com/ndownloader/files/20187339)
Supplement: Supplementary file 1 [file 20187339]

## Sheet: Overview
Event	Description					smfa	smfb	share_smfa_smfb
AA	Alternative Acceptor splice site					292	69	10
AD	Alternative Donor splice site					244	37	13
CE	Core exon, which may be bounded by one or more alternative AA/AD notes					307	29	11
EI/XX	Whippet node (denoted by XX) contained within exitron coordinates. Separate nodes forming a complete exitron are highlighted in blue					158	37	14
RI	Retained intron					1183	181	50
Total						2184	353	98

## Sheet: smfa
Gene	Node	Coord	Strand	Type	smfa	wild-type	DeltaPsi	Probability	Complexity	Entropy	description	comp_description	IPR_domain	has SNP/indels?	SNPs/indels
AT1G01020	3	1:8571-8593	-	AD	0.54053	0.70795	-0.16742	0.96	K1	0.9991	Arv1-like protein	ARV1; CONTAINS InterPro DOMAIN/s: Arv1-like protein (InterPro:IPR007290); BEST Arabidopsis thaliana protein match is: Arv1-like protein (TAIR:AT4G01510.1)	Arv1 protein	NO
AT1G01020	16	1:7233-7383	-	RI	0.12643	0.024233	0.1022	0.992	K1	0.5787	Arv1-like protein	ARV1; CONTAINS InterPro DOMAIN/s: Arv1-like protein (InterPro:IPR007290); BEST Arabidopsis thaliana protein match is: Arv1-like protein (TAIR:AT4G01510.1)	Arv1 protein	NO
AT1G01020	10	1:7836-7941	-	RI	0.54038	0.3251	0.21528	0.995	K4	2.1508	Arv1-like protein	ARV1; CONTAINS InterPro DOMAIN/s: Arv1-like protein (InterPro:IPR007290); BEST Arabidopsis thaliana protein match is: Arv1-like protein (TAIR:AT4G01510.1)	Arv1 protein	NO
AT1G01020	6	1:8326-8416	-	RI	0.084125	0.22891	-0.14479	0.992	K1	0.8498	Arv1-like protein	ARV1; CONTAINS InterPro DOMAIN/s: Arv1-like protein (InterPro:IPR007290); BEST Arabidopsis thaliana protein match is: Arv1-like protein (TAIR:AT4G01510.1)	Arv1 protein	NO
AT1G01060	16	1:35472-35474	-	AA	0.51316	0.31578	0.19739	0.977	K1	0.9975	Homeodomain-like superfamily protein	LATE ELONGATED HYPOCOTYL (LHY); CONTAINS InterPro DOMAIN/s: SANT, DNA-binding (InterPro:IPR001005), Homeodomain-like (InterPro:IPR009057), Myb, DNA-binding (InterPro:IPR014778), HTH transcriptional regulator, Myb-type, DNA-binding (InterPro:IPR017930), Myb-like DNA-binding domain, SHAQKYF class (InterPro:IPR006447); CONTAINS InterPro DOMAIN/s: SANT, DNA-binding (InterPro:IPR001005), Myb, DNA-bind…	Homeodomain-like | Myb domain | Myb domain, plants | SANT/Myb domain	NO
AT1G01290	9	1:115340-115481	+	RI	0.708	0.3506	0.35741	0.992	K2	1.1142	cofactor of nitrate reductase and xanthine dehydrogenase 3	cofactor of nitrate reductase and xanthine dehydrogenase 3 (CNX3); CONTAINS InterPro DOMAIN/s: Molybdopterin cofactor biosynthesis C (MoaC) domain (InterPro:IPR002820)	Molybdenum cofactor biosynthesis C | Molybdenum cofactor biosynthesis C, bacterial-type | Molybdopterin cofactor biosynthesis C (MoaC) domain	NO
AT1G01448	9	1:165769-165982	+	AA	0.92613	0.75017	0.17596	0.999	K2	1.4356	other RNA			NO
AT1G01448	11	1:165657-165768	+	RI	0.72418	0.57531	0.14887	0.973	K2	1.4356	other RNA			NO
AT1G01490	4	1:182136-182252	-	RI	0.58431	0.72985	-0.14554	0.999	K1	0.9911	Heavy metal transport/detoxification superfamily protein	Heavy metal transport/detoxification superfamily protein ; FUNCTIONS IN: metal ion binding; INVOLVED IN: metal ion transport; LOCATED IN: cellular_component unknown; EXPRESSED IN: 22 plant structures; EXPRESSED DURING: 14 growth stages; CONTAINS InterPro DOMAIN/s: Heavy metal transport/detoxification protein (InterPro:IPR006121); BEST Arabidopsis thaliana protein match is: Heavy metal transport/d…	Heavy metal-associated domain, HMA	NO
AT1G01550	7	1:199960-200510	+	RI	0.16412	0.010476	0.15364	1	K1	0.7713	Protein of unknown function (DUF793)	BYPASS 1 (BPS1); FUNCTIONS IN: molecular_function unknown; LOCATED IN: plasma membrane; EXPRESSED IN: 24 plant structures; EXPRESSED DURING: 13 growth stages; CONTAINS InterPro DOMAIN/s: Protein BYPASS related (InterPro:IPR008511); BEST Arabidopsis thaliana protein match is: unknown protein (TAIR:AT2G46080.1)	Protein BYPASS-related	NO
AT1G01710	22	1:266927-267019	+	CE	0.17932	0.36224	-0.18292	0.912	K3	1.7689	Acyl-CoA thioesterase family protein	Acyl-CoA thioesterase family protein; FUNCTIONS IN: cyclic nucleotide binding, acyl-CoA thioesterase activity; INVOLVED IN: acyl-CoA metabolic process; LOCATED IN: peroxisome; EXPRESSED IN: 22 plant structures; EXPRESSED DURING: 14 growth stages; CONTAINS InterPro DOMAIN/s: Cyclic nucleotide-binding (InterPro:IPR000595), Cyclic nucleotide-binding-like (InterPro:IPR018490), Acyl-CoA thioesterase (…	Acyl-CoA thioesterase | Cyclic nucleotide-binding domain | Cyclic nucleotide-binding-like | HotDog domain | RmlC-like jelly roll fold	NO
AT1G01710	3	1:262966-263046	+	RI	0.18009	0.023498	0.15659	1	K1	0.7939	Acyl-CoA thioesterase family protein	Acyl-CoA thioesterase family protein; FUNCTIONS IN: cyclic nucleotide binding, acyl-CoA thioesterase activity; INVOLVED IN: acyl-CoA metabolic process; LOCATED IN: peroxisome; EXPRESSED IN: 22 plant structures; EXPRESSED DURING: 14 growth stages; CONTAINS InterPro DOMAIN/s: Cyclic nucleotide-binding (InterPro:IPR000595), Cyclic nucleotide-binding-like (InterPro:IPR018490), Acyl-CoA thioesterase (…	Acyl-CoA thioesterase | Cyclic nucleotide-binding domain | Cyclic nucleotide-binding-like | HotDog domain | RmlC-like jelly roll fold	NO
AT1G01710	11	1:263573-263644	+	RI	0.15813	0.056721	0.10141	0.99	K1	0.6881	Acyl-CoA thioesterase family protein	Acyl-CoA thioesterase family protein; FUNCTIONS IN: cyclic nucleotide binding, acyl-CoA thioesterase activity; INVOLVED IN: acyl-CoA metabolic process; LOCATED IN: peroxisome; EXPRESSED IN: 22 plant structures; EXPRESSED DURING: 14 growth stages; CONTAINS InterPro DOMAIN/s: Cyclic nucleotide-binding (InterPro:IPR000595), Cyclic nucleotide-binding-like (InterPro:IPR018490), Acyl-CoA thioesterase (…	Acyl-CoA thioesterase | Cyclic nucleotide-binding domain | Cyclic nucleotide-binding-like | HotDog domain | RmlC-like jelly roll fold	NO
AT1G01740	6	1:274167-274170	-	AD	0.45867	0.79291	-0.33424	0.977	K1	1	Protein kinase protein with tetratricopeptide repeat domain	Protein kinase protein with tetratricopeptide repeat domain; FUNCTIONS IN: protein serine/threonine kinase activity, binding, protein kinase activity, kinase activity, ATP binding; INVOLVED IN: protein amino acid phosphorylation; INVOLVED IN: protein amino acid phosphorylation, N-terminal protein myristoylation; EXPRESSED IN: 22 plant structures; LOCATED IN: plasma membrane; EXPRESSED DURING: 13 …	Protein kinase domain | Protein kinase-like domain | Serine-threonine/tyrosine-protein kinase catalytic domain | Tetratricopeptide-like helical domain	NO
AT1G01770	14	1:280738-280849	+	AD	0.1675	0.31761	-0.15011	0.992	K2	1.1524		unknown protein; CONTAINS InterPro DOMAIN/s: Protein of unknown function DUF1446 (InterPro:IPR010839)	Protein of unknown function DUF1446	NO
AT1G01770	14	1:279911-279973	+	RI	0.40644	0.084795	0.32164	1	K1	0.9886		unknown protein; CONTAINS InterPro DOMAIN/s: Protein of unknown function DUF1446 (InterPro:IPR010839)	Protein of unknown function DUF1446	NO
AT1G01770	23	1:280850-280888	+	RI	0.13537	0.27358	-0.13821	0.992	K2	1.1524		unknown protein; CONTAINS InterPro DOMAIN/s: Protein of unknown function DUF1446 (InterPro:IPR010839)	Protein of unknown function DUF1446	NO
AT1G01860	19	1:304505-304696	-	RI	0.23779	0.096891	0.1409	0.993	K1	0.8287	Ribosomal RNA adenine dimethylase family protein	PALEFACE 1 (PFC1); FUNCTIONS IN: mRNA (2'-O-methyladenosine-N6-)-methyltransferase activity; INVOLVED IN: response to cold; LOCATED IN: chloroplast; EXPRESSED IN: 22 plant structures; EXPRESSED DURING: 13 growth stages; CONTAINS InterPro DOMAIN/s: Ribosomal RNA adenine methylase transferase, N-terminal (InterPro:IPR020598), Ribosomal RNA adenine methylase transferase, conserved site (InterPro:IPR…	Ribosomal RNA adenine methylase transferase | Ribosomal RNA adenine methylase transferase, N-terminal | Ribosomal RNA adenine methylase transferase, conserved site | S-adenosyl-L-methionine-dependent methyltransferase-like | rRNA adenine dimethylase-like	NO
AT1G01860	4	1:305935-306044	-	RI	0.26423	0.094987	0.16924	0.99	K1	0.8494	Ribosomal RNA adenine dimethylase family protein	PALEFACE 1 (PFC1); FUNCTIONS IN: mRNA (2'-O-methyladenosine-N6-)-methyltransferase activity; INVOLVED IN: response to cold; LOCATED IN: chloroplast; EXPRESSED IN: 22 plant structures; EXPRESSED DURING: 13 growth stages; CONTAINS InterPro DOMAIN/s: Ribosomal RNA adenine methylase transferase, N-terminal (InterPro:IPR020598), Ribosomal RNA adenine methylase transferase, conserved site (InterPro:IPR…	Ribosomal RNA adenine methylase transferase | Ribosomal RNA adenine methylase transferase, N-terminal | Ribosomal RNA adenine methylase transferase, conserved site | S-adenosyl-L-methionine-dependent methyltransferase-like | rRNA adenine dimethylase-like	NO
AT1G01920	24	1:317760-317764	+	AA	0.21178	0.095568	0.11621	0.948	K1	0.7308	SET domain-containing protein	SET domain-containing protein; CONTAINS InterPro DOMAIN/s: SET domain (InterPro:IPR001214); BEST Arabidopsis thaliana protein match is: Rubisco methyltransferase family protein (TAIR:AT1G14030.1)	SET domain	NO
AT1G01920	37	1:318202-318295	+	RI	0.19613	0.068912	0.12722	0.956	K1	0.7856	SET domain-containing protein	SET domain-containing protein; CONTAINS InterPro DOMAIN/s: SET domain (InterPro:IPR001214); BEST Arabidopsis thaliana protein match is: Rubisco methyltransferase family protein (TAIR:AT1G14030.1)	SET domain	NO
AT1G01920	42	1:318814-318985	+	RI	0.2643	0.10011	0.16419	0.994	K1	0.8502	SET domain-containing protein	SET domain-containing protein; CONTAINS InterPro DOMAIN/s: SET domain (InterPro:IPR001214); BEST Arabidopsis thaliana protein match is: Rubisco methyltransferase family protein (TAIR:AT1G14030.1)	SET domain	NO
AT1G02020	3	1:354122-354212	-	EI/RI	0.88735	0.74291	0.14444	0.992	K1	0.8631	nitroreductase family protein	nitroreductase family protein; FUNCTIONS IN: oxidoreductase activity, acting on NADH or NADPH, nitrogenous group as acceptor, oxidoreductase activity; INVOLVED IN: metabolic process; LOCATED IN: chloroplast; EXPRESSED IN: 23 plant structures; EXPRESSED DURING: 13 growth stages; CONTAINS InterPro DOMAIN/s: Nitroreductase-like (InterPro:IPR000415)	Nitroreductase | Nitroreductase-like	NO
AT1G02020	3	1:354122-354212	-	RI	0.88735	0.74291	0.14444	0.992	K1	0.8631	nitroreductase family protein	nitroreductase family protein; FUNCTIONS IN: oxidoreductase activity, acting on NADH or NADPH, nitrogenous group as acceptor, oxidoreductase activity; INVOLVED IN: metabolic process; LOCATED IN: chloroplast; EXPRESSED IN: 23 plant structures; EXPRESSED DURING: 13 growth stages; CONTAINS InterPro DOMAIN/s: Nitroreductase-like (InterPro:IPR000415)	Nitroreductase | Nitroreductase-like	NO
AT1G02080	6	1:373787-373891	+	RI	0.26755	0.045962	0.22159	0.971	K1	0.9441	transcription regulators	transcription regulators; FUNCTIONS IN: transcription regulator activity; EXPRESSED IN: 25 plant structures; LOCATED IN: membrane; EXPRESSED DURING: 15 growth stages; CONTAINS InterPro DOMAIN/s: CCR4-Not complex component, Not1 (InterPro:IPR007196)	CCR4-Not complex component, Not1, C-terminal | CCR4-Not complex, Not1 subunit, domain of unknown function DUF3819	NO
AT1G02090	14	1:387673-388267	-	RI	0.50135	0.093287	0.40807	1	K2	1.437	Proteasome component (PCI) domain protein	FUSCA 5 (FUS5); CONTAINS InterPro DOMAIN/s: Proteasome component (PCI) domain (InterPro:IPR000717)	Proteasome component (PCI) domain	NO
AT1G02100	3	1:390037-390052	+	AA	0.62134	0.77268	-0.15134	0.966	K1	0.9859	Leucine carboxyl methyltransferase	Leucine carboxyl methyltransferase; FUNCTIONS IN: methyltransferase activity; INVOLVED IN: biological_process unknown; LOCATED IN: cellular_component unknown; EXPRESSED IN: 22 plant structures; EXPRESSED DURING: 14 growth stages; CONTAINS InterPro DOMAIN/s: Leucine carboxyl methyltransferase, LCTM1 1 (InterPro:IPR016651), Leucine carboxyl methyltransferase, eukaryotic (InterPro:IPR021121), Leucin…	Leucine carboxyl methyltransferase | Leucine carboxyl methyltransferase 1, LCMT1 | S-adenosyl-L-methionine-dependent methyltransferase-like	NO
AT1G02100	30	1:392496-392575	+	RI	0.59034	0.28075	0.30958	1	K1	0.982	Leucine carboxyl methyltransferase	Leucine carboxyl methyltransferase; FUNCTIONS IN: methyltransferase activity; INVOLVED IN: biological_process unknown; LOCATED IN: cellular_component unknown; EXPRESSED IN: 22 plant structures; EXPRESSED DURING: 14 growth stages; CONTAINS InterPro DOMAIN/s: Leucine carboxyl methyltransferase, LCTM1 1 (InterPro:IPR016651), Leucine carboxyl methyltransferase, eukaryotic (InterPro:IPR021121), Leucin…	Leucine carboxyl methyltransferase | Leucine carboxyl methyltransferase 1, LCMT1 | S-adenosyl-L-methionine-dependent methyltransferase-like	NO
AT1G02145	24	1:406519-406720	+	RI	0.49181	0.17711	0.3147	1	K11	3.932	homolog of asparagine-linked glycosylation 12	homolog of asparagine-linked glycosylation 12 (ALG12); FUNCTIONS IN: alpha-1,6-mannosyltransferase activity; INVOLVED IN: ER-associated protein catabolic process, protein amino acid terminal N-glycosylation; LOCATED IN: endomembrane system, intrinsic to endoplasmic reticulum membrane; LOCATED IN: intrinsic to endoplasmic reticulum membrane; CONTAINS InterPro DOMAIN/s: Alg9-like mannosyltransferas…	GPI mannosyltransferase	NO
AT1G02700	3	1:588541-588662	+	RI	0.85763	0.64125	0.21637	0.91	K1	0.9995		unknown protein; FUNCTIONS IN: molecular_function unknown; INVOLVED IN: biological_process unknown; LOCATED IN: mitochondrion; BEST Arabidopsis thaliana protein match is: unknown protein (TAIR:AT4G02140.1)		NO
AT1G02840	25	1:628935-628945	+	AA	0.23453	0.36119	-0.12666	0.994	K4	1.8802	RNA-binding (RRM/RBD/RNP motifs) family protein	SR1; FUNCTIONS IN: RNA binding, nucleotide binding, nucleic acid binding; LOCATED IN: interchromatin granule, nuclear speck, nucleus; EXPRESSED IN: 25 plant structures; EXPRESSED DURING: 15 growth stages; CONTAINS InterPro DOMAIN/s: RNA recognition motif, RNP-1 (InterPro:IPR000504), Nucleotide-binding, alpha-beta plait (InterPro:IPR012677); BEST Arabidopsis thaliana protein match is: RNA-binding …	Nucleotide-binding, alpha-beta plait | RNA recognition motif domain	NO
AT1G02840	26	1:628946-629287	+	AA	0.27164	0.45686	-0.18521	1	K4	1.8802	RNA-binding (RRM/RBD/RNP motifs) family protein	SR1; FUNCTIONS IN: RNA binding, nucleotide binding, nucleic acid binding; LOCATED IN: interchromatin granule, nuclear speck, nucleus; EXPRESSED IN: 25 plant structures; EXPRESSED DURING: 15 growth stages; CONTAINS InterPro DOMAIN/s: RNA recognition motif, RNP-1 (InterPro:IPR000504), Nucleotide-binding, alpha-beta plait (InterPro:IPR012677); BEST Arabidopsis thaliana protein match is: RNA-binding …	Nucleotide-binding, alpha-beta plait | RNA recognition motif domain	NO
AT1G02840	23	1:628777-628856	+	CE	0.20955	0.43268	-0.22313	1	K4	1.8802	RNA-binding (RRM/RBD/RNP motifs) family protein	SR1; FUNCTIONS IN: RNA binding, nucleotide binding, nucleic acid binding; LOCATED IN: interchromatin granule, nuclear speck, nucleus; EXPRESSED IN: 25 plant structures; EXPRESSED DURING: 15 growth stages; CONTAINS InterPro DOMAIN/s: RNA recognition motif, RNP-1 (InterPro:IPR000504), Nucleotide-binding, alpha-beta plait (InterPro:IPR012677); BEST Arabidopsis thaliana protein match is: RNA-binding …	Nucleotide-binding, alpha-beta plait | RNA recognition motif domain	NO
AT1G02960	22	1:667438-667464	-	AA	0.53618	0.73346	-0.19729	0.988	K3	2.7606		unknown protein; LOCATED IN: cellular_component unknown; EXPRESSED IN: 23 plant structures; EXPRESSED DURING: 13 growth stages; BEST Arabidopsis thaliana protein match is: unknown protein (TAIR:AT1G02965.1)		NO
AT1G02960	32	1:667282-667372	-	RI	0.40796	0.54435	-0.13639	0.972	K3	2.7772		unknown protein; LOCATED IN: cellular_component unknown; EXPRESSED IN: 23 plant structures; EXPRESSED DURING: 13 growth stages; BEST Arabidopsis thaliana protein match is: unknown protein (TAIR:AT1G02965.1)		NO
AT1G03090	16	1:741208-741445	+	RI	0.21269	0.097806	0.11488	0.985	K5	3.0505	methylcrotonyl-CoA carboxylase alpha chain, mitochondrial / 3-methylcrotonyl-CoA carboxylase 1 (MCCA)	MCCA; FUNCTIONS IN: cobalt ion binding, methylcrotonoyl-CoA carboxylase activity; INVOLVED IN: leucine catabolic process; LOCATED IN: mitochondrion, cytosolic ribosome; EXPRESSED IN: 26 plant structures; EXPRESSED DURING: 13 growth stages; CONTAINS InterPro DOMAIN/s: Single hybrid motif (InterPro:IPR011053), Biotin/lipoyl attachment (InterPro:IPR000089), Carbamoyl phosphate synthase, large subuni…	ATP-grasp fold | ATP-grasp fold, subdomain 1 | ATP-grasp fold, subdomain 2 | Biotin carboxylase, C-terminal | Biotin carboxylation domain | Biotin-binding site | Biotin/lipoyl attachment | Carbamoyl-phosphate synthase, large subunit, N-terminal | Carbamoyl-phosphate synthetase large subunit-like, ATP-binding domain | Pre-ATP-grasp domain | Rudiment single hybrid motif | Single hybrid motif	NO
AT1G03090	20	1:741602-741683	+	RI	0.18103	0.075414	0.10562	0.997	K4	2.1656	methylcrotonyl-CoA carboxylase alpha chain, mitochondrial / 3-methylcrotonyl-CoA carboxylase 1 (MCCA)	MCCA; FUNCTIONS IN: cobalt ion binding, methylcrotonoyl-CoA carboxylase activity; INVOLVED IN: leucine catabolic process; LOCATED IN: mitochondrion, cytosolic ribosome; EXPRESSED IN: 26 plant structures; EXPRESSED DURING: 13 growth stages; CONTAINS InterPro DOMAIN/s: Single hybrid motif (InterPro:IPR011053), Biotin/lipoyl attachment (InterPro:IPR000089), Carbamoyl phosphate synthase, large subuni…	ATP-grasp fold | ATP-grasp fold, subdomain 1 | ATP-grasp fold, subdomain 2 | Biotin carboxylase, C-terminal | Biotin carboxylation domain | Biotin-binding site | Biotin/lipoyl attachment | Carbamoyl-phosphate synthase, large subunit, N-terminal | Carbamoyl-phosphate synthetase large subunit-like, ATP-binding domain | Pre-ATP-grasp domain | Rudiment single hybrid motif | Single hybrid motif	NO
AT1G03160	6	1:762579-762628	+	AD	0.26167	0.13306	0.12861	0.924	K1	0.8767	FZO-like	FZO-like (FZL); FUNCTIONS IN: thiamin-phosphate diphosphorylase activity, GTP binding; FUNCTIONS IN: thiamin-phosphate diphosphorylase activity, GTP binding, GTPase activity; INVOLVED IN: vegetative to reproductive phase transition of meristem, thylakoid membrane organization; LOCATED IN: chloroplast membrane, chloroplast; EXPRESSED IN: 23 plant structures; EXPRESSED DURING: 13 growth stages; CON…	Aldolase-type TIM barrel | GTP binding domain | P-loop containing nucleoside triphosphate hydrolase | Thiamin phosphate synthase superfamily | Thiamine phosphate synthase	NO
AT1G03550	16	1:886600-886608	-	AA	0.75121	0.27444	0.47678	0.983	K1	0.9183	Secretory carrier membrane protein (SCAMP) family protein	Secretory carrier membrane protein (SCAMP) family protein; FUNCTIONS IN: transmembrane transporter activity; INVOLVED IN: protein transport; LOCATED IN: integral to membrane; EXPRESSED IN: 23 plant structures; EXPRESSED DURING: 15 growth stages; CONTAINS InterPro DOMAIN/s: SCAMP (InterPro:IPR007273); BEST Arabidopsis thaliana protein match is: Secretory carrier membrane protein (SCAMP) family pro…	SCAMP	NO
AT1G03550	15	1:886696-886702	-	AD	0.27	0.73178	-0.46178	0.983	K1	0.9183	Secretory carrier membrane protein (SCAMP) family protein	Secretory carrier membrane protein (SCAMP) family protein; FUNCTIONS IN: transmembrane transporter activity; INVOLVED IN: protein transport; LOCATED IN: integral to membrane; EXPRESSED IN: 23 plant structures; EXPRESSED DURING: 15 growth stages; CONTAINS InterPro DOMAIN/s: SCAMP (InterPro:IPR007273); BEST Arabidopsis thaliana protein match is: Secretory carrier membrane protein (SCAMP) family pro…	SCAMP	NO
AT1G03550	11	1:886992-887014	-	AD	0.88368	0.65033	0.23335	0.901	K1	0.9911	Secretory carrier membrane protein (SCAMP) family protein	Secretory carrier membrane protein (SCAMP) family protein; FUNCTIONS IN: transmembrane transporter activity; INVOLVED IN: protein transport; LOCATED IN: integral to membrane; EXPRESSED IN: 23 plant structures; EXPRESSED DURING: 15 growth stages; CONTAINS InterPro DOMAIN/s: SCAMP (InterPro:IPR007273); BEST Arabidopsis thaliana protein match is: Secretory carrier membrane protein (SCAMP) family pro…	SCAMP	NO
AT1G03550	25	1:886101-886195	-	RI	0.52291	0.13638	0.38652	0.995	K1	0.9968	Secretory carrier membrane protein (SCAMP) family protein	Secretory carrier membrane protein (SCAMP) family protein; FUNCTIONS IN: transmembrane transporter activity; INVOLVED IN: protein transport; LOCATED IN: integral to membrane; EXPRESSED IN: 23 plant structures; EXPRESSED DURING: 15 growth stages; CONTAINS InterPro DOMAIN/s: SCAMP (InterPro:IPR007273); BEST Arabidopsis thaliana protein match is: Secretory carrier membrane protein (SCAMP) family pro…	SCAMP	NO
AT1G03550	23	1:886245-886392	-	RI	0.47943	0.17095	0.30848	0.991	K1	0.9975	Secretory carrier membrane protein (SCAMP) family protein	Secretory carrier membrane protein (SCAMP) family protein; FUNCTIONS IN: transmembrane transporter activity; INVOLVED IN: protein transport; LOCATED IN: integral to membrane; EXPRESSED IN: 23 plant structures; EXPRESSED DURING: 15 growth stages; CONTAINS InterPro DOMAIN/s: SCAMP (InterPro:IPR007273); BEST Arabidopsis thaliana protein match is: Secretory carrier membrane protein (SCAMP) family pro…	SCAMP	NO
AT1G03550	21	1:886461-886553	-	RI	0.63306	0.3262	0.30686	0.936	K1	0.971	Secretory carrier membrane protein (SCAMP) family protein	Secretory carrier membrane protein (SCAMP) family protein; FUNCTIONS IN: transmembrane transporter activity; INVOLVED IN: protein transport; LOCATED IN: integral to membrane; EXPRESSED IN: 23 plant structures; EXPRESSED DURING: 15 growth stages; CONTAINS InterPro DOMAIN/s: SCAMP (InterPro:IPR007273); BEST Arabidopsis thaliana protein match is: Secretory carrier membrane protein (SCAMP) family pro…	SCAMP	YES	1:886544:G-GT;splice_donor_region_variant
AT1G03740	6	1:935164-935213	+	AA	0.74682	0.92717	-0.18034	0.949	K1	0.8998	Protein kinase superfamily protein	Protein kinase superfamily protein; FUNCTIONS IN: protein serine/threonine kinase activity, protein kinase activity, kinase activity, ATP binding; INVOLVED IN: protein amino acid phosphorylation; INVOLVED IN: protein amino acid phosphorylation, N-terminal protein myristoylation; EXPRESSED IN: 24 plant structures; EXPRESSED DURING: 13 growth stages; CONTAINS InterPro DOMAIN/s: Protein kinase, ATP …	Protein kinase domain | Protein kinase, ATP binding site | Protein kinase-like domain | Serine/threonine-protein kinase, active site | Serine/threonine/dual specificity protein kinase, catalytic domain	NO
AT1G03960	13	1:1014635-1014676	+	CE	0.095773	0.50659	-0.41081	1	K2	1.1792	Calcium-binding EF hand family protein	Calcium-binding EF hand family protein; FUNCTIONS IN: calcium ion binding; INVOLVED IN: biological_process unknown; LOCATED IN: cellular_component unknown; EXPRESSED IN: 22 plant structures; EXPRESSED DURING: 14 growth stages; CONTAINS InterPro DOMAIN/s: EF-Hand 1, calcium-binding site (InterPro:IPR018247), EF-HAND 2 (InterPro:IPR018249), EF-hand-like domain (InterPro:IPR011992); BEST Arabidopsis…	EF-Hand 1, calcium-binding site | EF-hand domain | EF-hand domain pair	NO
AT1G03960	29	1:1016227-1016339	+	RI	0.18335	0.34126	-0.15791	0.978	K2	1.4216	Calcium-binding EF hand family protein	Calcium-binding EF hand family protein; FUNCTIONS IN: calcium ion binding; INVOLVED IN: biological_process unknown; LOCATED IN: cellular_component unknown; EXPRESSED IN: 22 plant structures; EXPRESSED DURING: 14 growth stages; CONTAINS InterPro DOMAIN/s: EF-Hand 1, calcium-binding site (InterPro:IPR018247), EF-HAND 2 (InterPro:IPR018249), EF-hand-like domain (InterPro:IPR011992); BEST Arabidopsis…	EF-Hand 1, calcium-binding site | EF-hand domain | EF-hand domain pair	NO
AT1G04080	28	1:1054533-1054555	+	AD	0.26748	0.42773	-0.16025	1	K8	3.6181	Tetratricopeptide repeat (TPR)-like superfamily protein	PRP39; FUNCTIONS IN: binding; INVOLVED IN: regulation of timing of transition from vegetative to reproductive phase; LOCATED IN: intracellular; EXPRESSED IN: 28 plant structures; LOCATED IN: intracellular, nucleus; EXPRESSED DURING: 13 growth stages; CONTAINS InterPro DOMAIN/s: RNA-processing protein, HAT helix (InterPro:IPR003107); BEST Arabidopsis thaliana protein match is: Tetratricopeptide re…	HAT (Half-A-TPR) repeat | Tetratricopeptide-like helical domain	NO
AT1G04080	29	1:1054556-1054560	+	AD	0.24065	0.37272	-0.13206	1	K8	3.6181	Tetratricopeptide repeat (TPR)-like superfamily protein	PRP39; FUNCTIONS IN: binding; INVOLVED IN: regulation of timing of transition from vegetative to reproductive phase; LOCATED IN: intracellular; EXPRESSED IN: 28 plant structures; LOCATED IN: intracellular, nucleus; EXPRESSED DURING: 13 growth stages; CONTAINS InterPro DOMAIN/s: RNA-processing protein, HAT helix (InterPro:IPR003107); BEST Arabidopsis thaliana protein match is: Tetratricopeptide re…	HAT (Half-A-TPR) repeat | Tetratricopeptide-like helical domain	NO
AT1G04080	17	1:1053096-1053187	+	CE	0.24787	0.37421	-0.12633	0.98	K8	3.6181	Tetratricopeptide repeat (TPR)-like superfamily protein	PRP39; FUNCTIONS IN: binding; INVOLVED IN: regulation of timing of transition from vegetative to reproductive phase; LOCATED IN: intracellular; EXPRESSED IN: 28 plant structures; LOCATED IN: intracellular, nucleus; EXPRESSED DURING: 13 growth stages; CONTAINS InterPro DOMAIN/s: RNA-processing protein, HAT helix (InterPro:IPR003107); BEST Arabidopsis thaliana protein match is: Tetratricopeptide re…	HAT (Half-A-TPR) repeat | Tetratricopeptide-like helical domain	NO
AT1G04080	22	1:1054285-1054385	+	CE	0.27322	0.44565	-0.17243	0.999	K8	3.6181	Tetratricopeptide repeat (TPR)-like superfamily protein	PRP39; FUNCTIONS IN: binding; INVOLVED IN: regulation of timing of transition from vegetative to reproductive phase; LOCATED IN: intracellular; EXPRESSED IN: 28 plant structures; LOCATED IN: intracellular, nucleus; EXPRESSED DURING: 13 growth stages; CONTAINS InterPro DOMAIN/s: RNA-processing protein, HAT helix (InterPro:IPR003107); BEST Arabidopsis thaliana protein match is: Tetratricopeptide re…	HAT (Half-A-TPR) repeat | Tetratricopeptide-like helical domain	NO
AT1G04080	26	1:1054485-1054528	+	CE	0.27407	0.44063	-0.16656	1	K8	3.6181	Tetratricopeptide repeat (TPR)-like superfamily protein	PRP39; FUNCTIONS IN: binding; INVOLVED IN: regulation of timing of transition from vegetative to reproductive phase; LOCATED IN: intracellular; EXPRESSED IN: 28 plant structures; LOCATED IN: intracellular, nucleus; EXPRESSED DURING: 13 growth stages; CONTAINS InterPro DOMAIN/s: RNA-processing protein, HAT helix (InterPro:IPR003107); BEST Arabidopsis thaliana protein match is: Tetratricopeptide re…	HAT (Half-A-TPR) repeat | Tetratricopeptide-like helical domain	NO
AT1G04080	36	1:1054561-1054662	+	RI	0.27045	0.39285	-0.1224	0.999	K9	3.9263	Tetratricopeptide repeat (TPR)-like superfamily protein	PRP39; FUNCTIONS IN: binding; INVOLVED IN: regulation of timing of transition from vegetative to reproductive phase; LOCATED IN: intracellular; EXPRESSED IN: 28 plant structures; LOCATED IN: intracellular, nucleus; EXPRESSED DURING: 13 growth stages; CONTAINS InterPro DOMAIN/s: RNA-processing protein, HAT helix (InterPro:IPR003107); BEST Arabidopsis thaliana protein match is: Tetratricopeptide re…	HAT (Half-A-TPR) repeat | Tetratricopeptide-like helical domain	NO
AT1G04130	10	1:1074426-1074529	+	RI	0.22518	0.06855	0.15663	0.991	K1	0.8165	Tetratricopeptide repeat (TPR)-like superfamily protein	Tetratricopeptide repeat (TPR)-like superfamily protein; FUNCTIONS IN: binding; INVOLVED IN: biological_process unknown; LOCATED IN: cellular_component unknown; EXPRESSED IN: 22 plant structures; EXPRESSED DURING: 13 growth stages; CONTAINS InterPro DOMAIN/s: Tetratricopeptide-like helical (InterPro:IPR011990), Tetratricopeptide repeat-containing (InterPro:IPR013026), Tetratricopeptide repeat (In…	Tetratricopeptide repeat-containing domain | Tetratricopeptide-like helical domain	NO
AT1G04300	13	1:1152972-1153035	-	RI	0.18857	0.069397	0.11917	0.974	K3	1.7998	TRAF-like superfamily protein	TRAF-like superfamily protein; CONTAINS InterPro DOMAIN/s: TRAF-like (InterPro:IPR008974), MATH (InterPro:IPR002083), TRAF-type (InterPro:IPR013322); FUNCTIONS IN: molecular_function unknown; INVOLVED IN: biological_process unknown; EXPRESSED IN: 24 plant structures; LOCATED IN: endomembrane system; EXPRESSED DURING: 15 growth stages; CONTAINS InterPro DOMAIN/s: TRAF-like (InterPro:IPR008974), MA…	MATH | TRAF-like	NO
AT1G04300	11	1:1153125-1153233	-	RI	0.23992	0.073975	0.16595	0.989	K3	1.7998	TRAF-like superfamily protein	TRAF-like superfamily protein; CONTAINS InterPro DOMAIN/s: TRAF-like (InterPro:IPR008974), MATH (InterPro:IPR002083), TRAF-type (InterPro:IPR013322); FUNCTIONS IN: molecular_function unknown; INVOLVED IN: biological_process unknown; EXPRESSED IN: 24 plant structures; LOCATED IN: endomembrane system; EXPRESSED DURING: 15 growth stages; CONTAINS InterPro DOMAIN/s: TRAF-like (InterPro:IPR008974), MA…	MATH | TRAF-like	NO
AT1G04390	16	1:1182014-1182080	-	EI/RI	0.87369	0.55743	0.31627	1	K1	0.9978	BTB/POZ domain-containing protein	BTB/POZ domain-containing protein; CONTAINS InterPro DOMAIN/s: BTB/POZ (InterPro:IPR013069), BTB/POZ fold (InterPro:IPR011333), Kelch related (InterPro:IPR013089), BTB/POZ-like (InterPro:IPR000210)		NO
AT1G04390	16	1:1182014-1182080	-	RI	0.87369	0.55743	0.31627	1	K1	0.9978	BTB/POZ domain-containing protein	BTB/POZ domain-containing protein; CONTAINS InterPro DOMAIN/s: BTB/POZ (InterPro:IPR013069), BTB/POZ fold (InterPro:IPR011333), Kelch related (InterPro:IPR013089), BTB/POZ-like (InterPro:IPR000210)		NO
AT1G04985	7	1:1417326-1417390	-	CE	0.8385	0.96086	-0.12236	1	K2	0.9466		unknown protein		NO
AT1G05200	11	1:1507886-1507917	+	CE	0.74199	0.99144	-0.24945	1	K3	2.1786	glutamate receptor 3.4	glutamate receptor 3.4 (GLR3.4); FUNCTIONS IN: protein binding, intracellular ligand-gated ion channel activity; INVOLVED IN: cellular calcium ion homeostasis, response to light stimulus; LOCATED IN: integral to membrane, membrane; EXPRESSED IN: 20 plant structures; EXPRESSED DURING: 13 growth stages; CONTAINS InterPro DOMAIN/s: Extracellular solute-binding protein, family 3 (InterPro:IPR001638),…	Extracellular ligand-binding receptor | Extracellular solute-binding protein, family 3 | Ionotropic glutamate receptor | Ionotropic glutamate receptor, plant | Periplasmic binding protein-like I	NO
AT1G05230	26	1:1513825-1513830	-	AD	0.41159	0.6767	-0.26511	0.998	K2	1.1643	homeodomain GLABROUS 2	homeodomain GLABROUS 2 (HDG2); FUNCTIONS IN: DNA binding, sequence-specific DNA binding transcription factor activity; INVOLVED IN: regulation of transcription, DNA-dependent, trichome morphogenesis; LOCATED IN: nucleus; EXPRESSED IN: 32 plant structures; EXPRESSED DURING: 15 growth stages; CONTAINS InterPro DOMAIN/s: Homeobox, conserved site (InterPro:IPR017970), Homeobox (InterPro:IPR001356), H…	Homeobox domain | Homeobox, conserved site | Homeodomain-like | START domain | START-like domain	NO
AT1G05320	9	1:1553894-1553949	+	CE	0.16839	0.42035	-0.25196	0.971	K3	2.0472		FUNCTIONS IN: molecular_function unknown; INVOLVED IN: biological_process unknown; LOCATED IN: cellular_component unknown; EXPRESSED IN: fruit, egg cell; CONTAINS InterPro DOMAIN/s: Prefoldin (InterPro:IPR009053); BEST Arabidopsis thaliana protein match is: unknown protein (TAIR:AT2G32240.1)		NO
AT1G05540	8	1:1639824-1639920	+	EI/RI	0.92451	0.60465	0.31985	0.9	K1	0.994	Protein of unknown function (DUF295)	Protein of unknown function (DUF295); FUNCTIONS IN: molecular_function unknown; INVOLVED IN: biological_process unknown; LOCATED IN: mitochondrion; EXPRESSED IN: 21 plant structures; EXPRESSED DURING: 13 growth stages; CONTAINS InterPro DOMAIN/s: Protein of unknown function DUF295 (InterPro:IPR005174); BEST Arabidopsis thaliana protein match is: Protein of unknown function (DUF295) (TAIR:AT1G3016…	Protein of unknown function DUF295	NO
AT1G05540	8	1:1639824-1639920	+	RI	0.92451	0.60465	0.31985	0.9	K1	0.994	Protein of unknown function (DUF295)	Protein of unknown function (DUF295); FUNCTIONS IN: molecular_function unknown; INVOLVED IN: biological_process unknown; LOCATED IN: mitochondrion; EXPRESSED IN: 21 plant structures; EXPRESSED DURING: 13 growth stages; CONTAINS InterPro DOMAIN/s: Protein of unknown function DUF295 (InterPro:IPR005174); BEST Arabidopsis thaliana protein match is: Protein of unknown function (DUF295) (TAIR:AT1G3016…	Protein of unknown function DUF295	NO
AT1G05830	17	1:1757137-1757144	+	AD	0.67767	0.86324	-0.18557	0.99	K2	1.1095	trithorax-like protein 2	trithorax-like protein 2 (ATX2); FUNCTIONS IN: histone methyltransferase activity (H3-K4 specific), DNA binding; INVOLVED IN: histone H3-K4 methylation, regulation of transcription, DNA-dependent, regulation of transcription; LOCATED IN: nucleus; EXPRESSED IN: stigma, rosette leaf, male gametophyte, root; CONTAINS InterPro DOMAIN/s: SET domain (InterPro:IPR001214), Zinc finger, PHD-type, conserve…	FY-rich, C-terminal | FY-rich, N-terminal | PWWP domain | Post-SET domain | SET domain | Zinc finger, FYVE/PHD-type | Zinc finger, PHD-finger | Zinc finger, PHD-type | Zinc finger, PHD-type, conserved site | Zinc finger, RING/FYVE/PHD-type	NO
AT1G05870	23	1:1771758-1771788	-	AA	0.57167	0.82365	-0.25198	0.987	K3	2.1695	Protein of unknown function (DUF1685)	Protein of unknown function (DUF1685); FUNCTIONS IN: molecular_function unknown; INVOLVED IN: N-terminal protein myristoylation; LOCATED IN: cellular_component unknown; CONTAINS InterPro DOMAIN/s: Protein of unknown function DUF1685 (InterPro:IPR012881); BEST Arabidopsis thaliana protein match is: Protein of unknown function (DUF1685) (TAIR:AT2G31560.2)	Protein of unknown function DUF1685	NO
AT1G05870	22	1:1771789-1771814	-	AA	0.48696	0.81024	-0.32329	0.997	K3	2.1695	Protein of unknown function (DUF1685)	Protein of unknown function (DUF1685); FUNCTIONS IN: molecular_function unknown; INVOLVED IN: N-terminal protein myristoylation; LOCATED IN: cellular_component unknown; CONTAINS InterPro DOMAIN/s: Protein of unknown function DUF1685 (InterPro:IPR012881); BEST Arabidopsis thaliana protein match is: Protein of unknown function (DUF1685) (TAIR:AT2G31560.2)	Protein of unknown function DUF1685	NO
AT1G05870	22	1:1771815-1771891	-	RI	0.36511	0.62319	-0.25809	0.989	K3	2.1695	Protein of unknown function (DUF1685)	Protein of unknown function (DUF1685); FUNCTIONS IN: molecular_function unknown; INVOLVED IN: N-terminal protein myristoylation; LOCATED IN: cellular_component unknown; CONTAINS InterPro DOMAIN/s: Protein of unknown function DUF1685 (InterPro:IPR012881); BEST Arabidopsis thaliana protein match is: Protein of unknown function (DUF1685) (TAIR:AT2G31560.2)	Protein of unknown function DUF1685	NO
AT1G05870	17	1:1772164-1772308	-	RI	0.75119	0.16335	0.58784	1	K3	1.3245	Protein of unknown function (DUF1685)	Protein of unknown function (DUF1685); FUNCTIONS IN: molecular_function unknown; INVOLVED IN: N-terminal protein myristoylation; LOCATED IN: cellular_component unknown; CONTAINS InterPro DOMAIN/s: Protein of unknown function DUF1685 (InterPro:IPR012881); BEST Arabidopsis thaliana protein match is: Protein of unknown function (DUF1685) (TAIR:AT2G31560.2)	Protein of unknown function DUF1685	NO
AT1G05890	17	1:1781260-1781694	+	RI	0.18152	0.071208	0.11032	1	K2	0.7381	RING/U-box superfamily protein	ARIADNE 5 (ARI5); FUNCTIONS IN: zinc ion binding; FUNCTIONS IN: zinc ion binding, nucleic acid binding; EXPRESSED IN: 23 plant structures; EXPRESSED IN: 24 plant structures; EXPRESSED DURING: 15 growth stages; CONTAINS InterPro DOMAIN/s: Zinc finger, C6HC-type (InterPro:IPR002867), Zinc finger, RING-type (InterPro:IPR001841); CONTAINS InterPro DOMAIN/s: Zinc finger, C6HC-type (InterPro:IPR002867)…	Zinc finger, C6HC-type | Zinc finger, CCHC-type | Zinc finger, RING-type | Zinc finger, RING/FYVE/PHD-type	NO
AT1G05940	5	1:1803608-1803692	-	RI	0.28183	0.075822	0.20601	0.987	K1	0.9502	cationic amino acid transporter 9	cationic amino acid transporter 9 (CAT9); FUNCTIONS IN: cationic amino acid transmembrane transporter activity; INVOLVED IN: amino acid transport, transport, transmembrane transport; LOCATED IN: plasma membrane; EXPRESSED IN: 25 plant structures; EXPRESSED DURING: 15 growth stages; CONTAINS InterPro DOMAIN/s: Cationic amino acid transporter (InterPro:IPR015606), Amino acid/polyamine transporter I…	Amino acid/polyamine transporter I | Cationic amino acid transporter, C-terminal	NO
AT1G06230	5	1:1907276-1907280	+	AA	0.79391	0.63182	0.16209	0.981	K2	1.4926	global transcription factor group E4	global transcription factor group E4 (GTE4); FUNCTIONS IN: DNA binding; INVOLVED IN: DNA mediated transformation, cell cycle, root development; LOCATED IN: cellular_component unknown; EXPRESSED IN: 23 plant structures; EXPRESSED DURING: 13 growth stages; CONTAINS InterPro DOMAIN/s: Bromodomain (InterPro:IPR001487); BEST Arabidopsis thaliana protein match is: DNA-binding bromodomain-containing pro…	Bromodomain | NET domain	NO
AT1G06230	4	1:1907170-1907275	+	RI	0.72044	0.40952	0.31092	1	K2	1.564	global transcription factor group E4	global transcription factor group E4 (GTE4); FUNCTIONS IN: DNA binding; INVOLVED IN: DNA mediated transformation, cell cycle, root development; LOCATED IN: cellular_component unknown; EXPRESSED IN: 23 plant structures; EXPRESSED DURING: 13 growth stages; CONTAINS InterPro DOMAIN/s: Bromodomain (InterPro:IPR001487); BEST Arabidopsis thaliana protein match is: DNA-binding bromodomain-containing pro…	Bromodomain | NET domain	NO
AT1G06260	7	1:1917222-1917301	+	RI	0.83047	0.59472	0.23575	0.935	K1	0.9957	Cysteine proteinases superfamily protein	Cysteine proteinases superfamily protein; FUNCTIONS IN: cysteine-type peptidase activity, cysteine-type endopeptidase activity; INVOLVED IN: proteolysis; LOCATED IN: endomembrane system; EXPRESSED IN: petal, leaf whorl, sepal, flower; EXPRESSED DURING: 4 anthesis, petal differentiation and expansion stage; CONTAINS InterPro DOMAIN/s: Peptidase C1A, papain (InterPro:IPR013128), Proteinase inhibito…	Cysteine peptidase, asparagine active site | Cysteine peptidase, cysteine active site | Cysteine peptidase, histidine active site | Peptidase C1A | Peptidase C1A, papain C-terminal | Proteinase inhibitor I29, cathepsin propeptide	NO
AT1G06370	10	1:1943754-1943787	-	CE	0.66078	0.95949	-0.29871	1	K4	2.7223		pseudogene, similar to putative glycolipid alpha-mannosyltransferase, blastp match of 41% identity and 9.6e-10 P-value to GP|13161358|dbj|BAB32949.1||AP002908 putative glycolipid alpha-mannosyltransferase {Oryza sativa (japonica cultivar-group)}		NO
AT1G06390	28	1:1950456-1950601	+	RI	0.63945	0.8305	-0.19105	1	K1	0.9555	GSK3/SHAGGY-like protein kinase 1	GSK3/SHAGGY-like protein kinase 1 (GSK1); FUNCTIONS IN: kinase activity, glycogen synthase kinase 3 activity; INVOLVED IN: brassinosteroid mediated signaling pathway, protein amino acid phosphorylation, hyperosmotic salinity response, regulation of protein localization; LOCATED IN: cytosol, plasma membrane; EXPRESSED IN: 24 plant structures; EXPRESSED DURING: 13 growth stages; CONTAINS InterPro D…	Protein kinase domain | Protein kinase, ATP binding site | Protein kinase-like domain | Serine/threonine-protein kinase, active site | Serine/threonine/dual specificity protein kinase, catalytic domain	NO
AT1G06410	4	1:1954898-1955031	+	AD	0.22264	0.11419	0.10845	0.982	K1	0.8381	trehalose-phosphatase/synthase 7	trehalose-phosphatase/synthase 7 (TPS7); FUNCTIONS IN: transferase activity, transferring glycosyl groups, trehalose-phosphatase activity; INVOLVED IN: trehalose biosynthetic process, metabolic process; EXPRESSED IN: 27 plant structures; EXPRESSED DURING: 15 growth stages; CONTAINS InterPro DOMAIN/s: HAD-superfamily hydrolase, subfamily IIB (InterPro:IPR006379), Glycosyl transferase, family 20 (I…	Glycosyl transferase, family 20 | HAD-like domain | HAD-superfamily hydrolase, subfamily IIB | Trehalose-phosphatase	NO
AT1G06630	12	1:2030208-2031090	+	RI	0.54675	0.76291	-0.21616	1	K1	1	F-box/RNI-like superfamily protein	F-box/RNI-like superfamily protein; FUNCTIONS IN: molecular_function unknown; INVOLVED IN: biological_process unknown; LOCATED IN: cellular_component unknown; EXPRESSED IN: 24 plant structures; EXPRESSED DURING: 13 growth stages; CONTAINS InterPro DOMAIN/s: F-box domain, cyclin-like (InterPro:IPR001810), F-box domain, Skp2-like (InterPro:IPR022364); BEST Arabidopsis thaliana protein match is: F-b…	F-box domain	NO
AT1G06890	17	1:2111603-2111605	-	AA	0.68531	0.85127	-0.16596	0.991	K2	1.5436	nodulin MtN21 /EamA-like transporter family protein	nodulin MtN21 /EamA-like transporter family protein; CONTAINS InterPro DOMAIN/s: Protein of unknown function DUF250 (InterPro:IPR004853); BEST Arabidopsis thaliana protein match is: Nucleotide/sugar transporter family protein (TAIR:AT2G30460.2)	Triose-phosphate transporter domain	NO
AT1G06890	22	1:2111606-2111760	-	RI	0.51439	0.77396	-0.25957	0.999	K2	1.5449	nodulin MtN21 /EamA-like transporter family protein	nodulin MtN21 /EamA-like transporter family protein; CONTAINS InterPro DOMAIN/s: Protein of unknown function DUF250 (InterPro:IPR004853); BEST Arabidopsis thaliana protein match is: Nucleotide/sugar transporter family protein (TAIR:AT2G30460.2)	Triose-phosphate transporter domain	NO
AT1G06890	16	1:2112600-2112705	-	RI	0.14873	0.039997	0.10874	1	K1	0.6225	nodulin MtN21 /EamA-like transporter family protein	nodulin MtN21 /EamA-like transporter family protein; CONTAINS InterPro DOMAIN/s: Protein of unknown function DUF250 (InterPro:IPR004853); BEST Arabidopsis thaliana protein match is: Nucleotide/sugar transporter family protein (TAIR:AT2G30460.2)	Triose-phosphate transporter domain	NO
AT1G06960	16	1:2137147-2137263	+	RI	0.36822	0.69126	-0.32304	1	K2	1.4491	RNA-binding (RRM/RBD/RNP motifs) family protein	RNA-binding (RRM/RBD/RNP motifs) family protein; FUNCTIONS IN: RNA binding, nucleotide binding, nucleic acid binding; EXPRESSED IN: 20 plant structures; EXPRESSED DURING: 12 growth stages; CONTAINS InterPro DOMAIN/s: RNA recognition motif, RNP-1 (InterPro:IPR000504), Nucleotide-binding, alpha-beta plait (InterPro:IPR012677); BEST Arabidopsis thaliana protein match is: U2 small nuclear ribonucleop…	Nucleotide-binding, alpha-beta plait | RNA recognition motif domain | U1 small nuclear ribonucleoprotein A/U2 small nuclear ribonucleoprotein B''	NO
AT1G07320	10	1:2250026-2250172	+	RI	0.30804	0.084336	0.2237	1	K2	1.128	ribosomal protein L4	ribosomal protein L4 (RPL4); FUNCTIONS IN: structural constituent of ribosome, poly(U) RNA binding; INVOLVED IN: translation; LOCATED IN: in 10 components; LOCATED IN: in 7 components; LOCATED IN: in 9 components; EXPRESSED IN: 23 plant structures; EXPRESSED DURING: 14 growth stages; CONTAINS InterPro DOMAIN/s: Ribosomal protein L4 (InterPro:IPR015498), Ribosomal protein L4/L1e, bacterial-type (I…	Ribosomal protein L4 domain | Ribosomal protein L4/L1e | Ribosomal protein L4/L1e, bacterial-type	NO
AT1G07350	13	1:2258747-2258749	-	AD	0.24043	0.38309	-0.14267	0.946	K4	2.5189	RNA-binding (RRM/RBD/RNP motifs) family protein	RNA-binding (RRM/RBD/RNP motifs) family protein; FUNCTIONS IN: RNA binding, nucleotide binding, nucleic acid binding; INVOLVED IN: RNA splicing; EXPRESSED IN: 26 plant structures; EXPRESSED DURING: 15 growth stages; CONTAINS InterPro DOMAIN/s: RNA recognition motif, RNP-1 (InterPro:IPR000504), Nucleotide-binding, alpha-beta plait (InterPro:IPR012677); BEST Arabidopsis thaliana protein match is: R…	Nucleotide-binding, alpha-beta plait | RNA recognition motif domain	NO
AT1G07350	17	1:2258603-2258746	-	RI	0.20785	0.3341	-0.12625	0.963	K4	2.596	RNA-binding (RRM/RBD/RNP motifs) family protein	RNA-binding (RRM/RBD/RNP motifs) family protein; FUNCTIONS IN: RNA binding, nucleotide binding, nucleic acid binding; INVOLVED IN: RNA splicing; EXPRESSED IN: 26 plant structures; EXPRESSED DURING: 15 growth stages; CONTAINS InterPro DOMAIN/s: RNA recognition motif, RNP-1 (InterPro:IPR000504), Nucleotide-binding, alpha-beta plait (InterPro:IPR012677); BEST Arabidopsis thaliana protein match is: R…	Nucleotide-binding, alpha-beta plait | RNA recognition motif domain	NO
AT1G07600	2	1:2339196-2339265	-	AD	0.14081	0.36893	-0.22812	0.997	K2	0.9948	metallothionein 1A	metallothionein 1A (MT1A); BEST Arabidopsis thaliana protein match is: metallothionein 1C (TAIR:AT1G07610.1)		NO
AT1G07600	3	1:2338986-2339195	-	RI	0.10316	0.27542	-0.17226	0.961	K2	0.9729	metallothionein 1A	metallothionein 1A (MT1A); BEST Arabidopsis thaliana protein match is: metallothionein 1C (TAIR:AT1G07610.1)		NO
AT1G07650	42	1:2361683-2361760	-	EI/RI	0.9713	0.8064	0.1649	0.995	K2	1.0001	Leucine-rich repeat transmembrane protein kinase	Leucine-rich repeat transmembrane protein kinase; FUNCTIONS IN: protein serine/threonine kinase activity, kinase activity, ATP binding; INVOLVED IN: protein amino acid phosphorylation, transmembrane receptor protein tyrosine kinase signaling pathway; INVOLVED IN: transmembrane receptor protein tyrosine kinase signaling pathway, protein amino acid phosphorylation; LOCATED IN: endomembrane system; …	Concanavalin A-like lectin/glucanase, subgroup | Leucine-rich repeat | Malectin | Protein kinase domain | Protein kinase, ATP binding site | Protein kinase-like domain | Serine-threonine/tyrosine-protein kinase catalytic domain | Serine/threonine-protein kinase, active site	NO
AT1G07650	42	1:2361683-2361760	-	RI	0.9713	0.8064	0.1649	0.995	K2	1.0001	Leucine-rich repeat transmembrane protein kinase	Leucine-rich repeat transmembrane protein kinase; FUNCTIONS IN: protein serine/threonine kinase activity, kinase activity, ATP binding; INVOLVED IN: protein amino acid phosphorylation, transmembrane receptor protein tyrosine kinase signaling pathway; INVOLVED IN: transmembrane receptor protein tyrosine kinase signaling pathway, protein amino acid phosphorylation; LOCATED IN: endomembrane system; …	Concanavalin A-like lectin/glucanase, subgroup | Leucine-rich repeat | Malectin | Protein kinase domain | Protein kinase, ATP binding site | Protein kinase-like domain | Serine-threonine/tyrosine-protein kinase catalytic domain | Serine/threonine-protein kinase, active site	NO
AT1G07725	2	1:2396435-2396528	-	RI	0.7301	0.30886	0.42124	0.999	K1	0.9376	exocyst subunit exo70 family protein H6	exocyst subunit exo70 family protein H6 (EXO70H6); INVOLVED IN: exocytosis, vesicle docking involved in exocytosis; LOCATED IN: exocyst; CONTAINS InterPro DOMAIN/s: Exo70 exocyst complex subunit (InterPro:IPR004140); BEST Arabidopsis thaliana protein match is: exocyst subunit exo70 family protein H5 (TAIR:AT2G28640.1)	Cullin repeat-like-containing domain | Exocyst complex protein Exo70	NO
AT1G07745	5	1:2402620-2402754	-	AD	0.29267	0.47246	-0.17979	0.954	K2	1.2117	homolog of RAD51 D	homolog of RAD51 D (RAD51D); FUNCTIONS IN: DNA-dependent ATPase activity, DNA binding, ATP binding; FUNCTIONS IN: nucleoside-triphosphatase activity, DNA-dependent ATPase activity, DNA binding, nucleotide binding, ATP binding; INVOLVED IN: DNA repair, somatic cell DNA recombination, regulation of response to biotic stimulus; LOCATED IN: endomembrane system; EXPRESSED IN: sperm cell, male gametoph…	AAA+ ATPase domain | DNA recombination and repair protein Rad51, C-terminal | DNA recombination and repair protein RecA-like, ATP-binding domain | P-loop containing nucleoside triphosphate hydrolase	NO
AT1G07745	12	1:2401642-2401736	-	RI	0.14262	0.3052	-0.16258	0.937	K4	1.3175	homolog of RAD51 D	homolog of RAD51 D (RAD51D); FUNCTIONS IN: DNA-dependent ATPase activity, DNA binding, ATP binding; FUNCTIONS IN: nucleoside-triphosphatase activity, DNA-dependent ATPase activity, DNA binding, nucleotide binding, ATP binding; INVOLVED IN: DNA repair, somatic cell DNA recombination, regulation of response to biotic stimulus; LOCATED IN: endomembrane system; EXPRESSED IN: sperm cell, male gametoph…	AAA+ ATPase domain | DNA recombination and repair protein Rad51, C-terminal | DNA recombination and repair protein RecA-like, ATP-binding domain | P-loop containing nucleoside triphosphate hydrolase	NO
AT1G07780	12	1:2412194-2412216	-	CE	0.41569	0.65449	-0.23879	0.931	K4	2.6568	phosphoribosylanthranilate isomerase 1	phosphoribosylanthranilate isomerase 1 (PAI1); CONTAINS InterPro DOMAIN/s: N-(5&apos;phosphoribosyl)anthranilate isomerase (PRAI) (InterPro:IPR001240), Aldolase-type TIM barrel (InterPro:IPR013785), Ribulose-phosphate binding barrel (InterPro:IPR011060); BEST Arabidopsis thaliana protein match is: phosphoribosylanthranilate isomerase 2 (TAIR:AT5G05590.1)	Aldolase-type TIM barrel | N-(5'phosphoribosyl) anthranilate isomerase (PRAI) like domain | Ribulose-phosphate binding barrel	NO
AT1G07902	5	1:2444873-2444932	+	AA	0.32507	0.11161	0.21346	0.941	K1	0.8813	hypothetical protein;(source:Araport11)			NO
AT1G07990	37	1:2481826-2481971	+	RI	0.044121	0.15396	-0.10984	0.989	K1	0.6593	SIT4 phosphatase-associated family protein	SIT4 phosphatase-associated family protein; INVOLVED IN: biological_process unknown; LOCATED IN: endomembrane system; EXPRESSED IN: 23 plant structures; EXPRESSED DURING: 13 growth stages; CONTAINS InterPro DOMAIN/s: SIT4 phosphatase-associated protein (InterPro:IPR007587); BEST Arabidopsis thaliana protein match is: SIT4 phosphatase-associated family protein (TAIR:AT2G28360.1)	Armadillo-like helical | Armadillo-type fold | SIT4 phosphatase-associated protein family	NO
AT1G08030	10	1:2492761-2492763	-	AA	0.42594	0.67814	-0.2522	0.955	K2	1.5068	tyrosylprotein sulfotransferase	tyrosylprotein sulfotransferase (TPST); FUNCTIONS IN: protein-tyrosine sulfotransferase activity; INVOLVED IN: carbohydrate biosynthetic process; LOCATED IN: Golgi apparatus; EXPRESSED IN: 26 plant structures; EXPRESSED DURING: 15 growth stages; CONTAINS InterPro DOMAIN/s: Sulfotransferase (InterPro:IPR005331), Heparan sulphate 6-sulfotransferase (InterPro:IPR010635)	Heparan sulphate 6-sulfotransferase/Protein-tyrosine sulfotransferase | Sulfotransferase	NO
AT1G08040	3	1:2498480-2498483	-	AD	0.16031	0.31145	-0.15114	0.918	K2	1.3182	Protein of unknown function (DUF707)	Protein of unknown function (DUF707); FUNCTIONS IN: molecular_function unknown; INVOLVED IN: biological_process unknown; EXPRESSED IN: 25 plant structures; EXPRESSED DURING: 15 growth stages; CONTAINS InterPro DOMAIN/s: Protein of unknown function DUF707 (InterPro:IPR007877); BEST Arabidopsis thaliana protein match is: Protein of unknown function (DUF707) (TAIR:AT2G28310.3)	Protein of unknown function DUF707	NO
AT1G08110	10	1:2535570-2535585	+	CE	0.3142	0.46344	-0.14924	1	K3	1.5742	lactoylglutathione lyase family protein / glyoxalase I family protein	lactoylglutathione lyase family protein / glyoxalase I family protein; FUNCTIONS IN: calmodulin binding, lactoylglutathione lyase activity; INVOLVED IN: response to cadmium ion, carbohydrate metabolic process; LOCATED IN: chloroplast; EXPRESSED IN: 25 plant structures; EXPRESSED DURING: 14 growth stages; CONTAINS InterPro DOMAIN/s: Glyoxalase I (InterPro:IPR004361), Glyoxalase I, conserved site (…	Glyoxalase I | Glyoxalase I, conserved site | Glyoxalase/Bleomycin resistance protein/Dihydroxybiphenyl dioxygenase | Glyoxalase/fosfomycin resistance/dioxygenase domain	NO
AT1G08230	8	1:2586098-2586288	-	AD	0.69633	0.4728	0.22353	0.998	K2	1.4938	Transmembrane amino acid transporter family protein	Transmembrane amino acid transporter family protein; EXPRESSED IN: 22 plant structures; EXPRESSED DURING: 10 growth stages; CONTAINS InterPro DOMAIN/s: Amino acid transporter, transmembrane (InterPro:IPR013057); BEST Arabidopsis thaliana protein match is: Transmembrane amino acid transporter family protein (TAIR:AT5G41800.1)	Amino acid transporter, transmembrane	NO
AT1G08230	9	1:2585085-2586097	-	RI	0.68537	0.35592	0.32945	0.996	K2	1.4938	Transmembrane amino acid transporter family protein	Transmembrane amino acid transporter family protein; EXPRESSED IN: 22 plant structures; EXPRESSED DURING: 10 growth stages; CONTAINS InterPro DOMAIN/s: Amino acid transporter, transmembrane (InterPro:IPR013057); BEST Arabidopsis thaliana protein match is: Transmembrane amino acid transporter family protein (TAIR:AT5G41800.1)	Amino acid transporter, transmembrane	NO
AT1G08300	6	1:2616699-2616812	+	CE	0.57083	0.88668	-0.31586	0.935	K2	1.5414	no vein-like	NO VEIN-LIKE (NVL); FUNCTIONS IN: molecular_function unknown; INVOLVED IN: biological_process unknown; LOCATED IN: endomembrane system; BEST Arabidopsis thaliana protein match is: Histidine kinase-, DNA gyrase B-, and HSP90-like ATPase family protein (TAIR:AT4G13750.1)	Domain of unknown function DUF3883	NO
AT1G08300	13	1:2617388-2617756	+	RI	0.45891	0.80428	-0.34537	0.948	K4	2.9025	no vein-like	NO VEIN-LIKE (NVL); FUNCTIONS IN: molecular_function unknown; INVOLVED IN: biological_process unknown; LOCATED IN: endomembrane system; BEST Arabidopsis thaliana protein match is: Histidine kinase-, DNA gyrase B-, and HSP90-like ATPase family protein (TAIR:AT4G13750.1)	Domain of unknown function DUF3883	NO
AT1G08530	14	1:2702682-2702806	+	RI	0.23045	0.054685	0.17576	0.986	K1	0.8763		unknown protein; FUNCTIONS IN: molecular_function unknown; INVOLVED IN: biological_process unknown; LOCATED IN: chloroplast; BEST Arabidopsis thaliana protein match is: unknown protein (TAIR:AT5G09995.2)		NO
AT1G08660	17	1:2757589-2757601	-	AD	0.31309	0.51676	-0.20367	0.988	K2	1.112	MALE GAMETOPHYTE DEFECTIVE 2	MALE GAMETOPHYTE DEFECTIVE 2 (MGP2); FUNCTIONS IN: transferase activity, transferring glycosyl groups, sialyltransferase activity; INVOLVED IN: protein amino acid glycosylation; LOCATED IN: Golgi apparatus, membrane; EXPRESSED IN: 22 plant structures; EXPRESSED DURING: 13 growth stages; CONTAINS InterPro DOMAIN/s: Glycosyl transferase, family 29 (InterPro:IPR001675); BEST Arabidopsis thaliana pro…	Glycosyl transferase, family 29	NO
AT1G08660	27	1:2757515-2757588	-	RI	0.29469	0.50618	-0.21149	0.986	K2	1.1081	MALE GAMETOPHYTE DEFECTIVE 2	MALE GAMETOPHYTE DEFECTIVE 2 (MGP2); FUNCTIONS IN: transferase activity, transferring glycosyl groups, sialyltransferase activity; INVOLVED IN: protein amino acid glycosylation; LOCATED IN: Golgi apparatus, membrane; EXPRESSED IN: 22 plant structures; EXPRESSED DURING: 13 growth stages; CONTAINS InterPro DOMAIN/s: Glycosyl transferase, family 29 (InterPro:IPR001675); BEST Arabidopsis thaliana pro…	Glycosyl transferase, family 29	NO
AT1G08810	4	1:2819970-2819976	-	AD	0.75758	0.90478	-0.1472	0.943	K2	1.5068	myb domain protein 60	myb domain protein 60 (MYB60); CONTAINS InterPro DOMAIN/s: Homeodomain-like (InterPro:IPR009057), Myb, DNA-binding (InterPro:IPR014778), HTH transcriptional regulator, Myb-type, DNA-binding (InterPro:IPR017930), Homeodomain-related (InterPro:IPR012287), Myb transcription factor (InterPro:IPR015495); CONTAINS InterPro DOMAIN/s: SANT, DNA-binding (InterPro:IPR001005), Homeodomain-like (InterPro:IPR…	Homeodomain-like | Myb domain | SANT/Myb domain	NO
AT1G08810	6	1:2819859-2819969	-	RI	0.26112	0.41898	-0.15786	0.949	K2	1.511	myb domain protein 60	myb domain protein 60 (MYB60); CONTAINS InterPro DOMAIN/s: Homeodomain-like (InterPro:IPR009057), Myb, DNA-binding (InterPro:IPR014778), HTH transcriptional regulator, Myb-type, DNA-binding (InterPro:IPR017930), Homeodomain-related (InterPro:IPR012287), Myb transcription factor (InterPro:IPR015495); CONTAINS InterPro DOMAIN/s: SANT, DNA-binding (InterPro:IPR001005), Homeodomain-like (InterPro:IPR…	Homeodomain-like | Myb domain | SANT/Myb domain	NO
AT1G08910	25	1:2858653-2858704	+	CE	0.55799	0.88584	-0.32785	0.942	K3	1.9079	zinc ion binding;zinc ion binding	embryo defective 3001 (EMB3001); FUNCTIONS IN: zinc ion binding; INVOLVED IN: embryo development ending in seed dormancy; LOCATED IN: cellular_component unknown; CONTAINS InterPro DOMAIN/s: Zinc finger, MIZ-type (InterPro:IPR004181); BEST Arabidopsis thaliana protein match is: RING/U-box superfamily protein (TAIR:AT5G41580.1)	E3 SUMO protein ligase | Zinc finger, MIZ-type	NO
AT1G08960	3	1:2880574-2881022	+	AD	0.14868	0.32008	-0.17139	0.912	K1	0.93	cation exchanger 11	cation exchanger 11 (CAX11); FUNCTIONS IN: cation:cation antiporter activity, calcium:sodium antiporter activity; INVOLVED IN: cation transport, transmembrane transport; LOCATED IN: endomembrane system, integral to membrane; EXPRESSED IN: 22 plant structures; EXPRESSED DURING: 14 growth stages; CONTAINS InterPro DOMAIN/s: Sodium/calcium exchanger membrane region (InterPro:IPR004837); BEST Arabido…	Sodium/calcium exchanger membrane region	NO
AT1G08970	6	1:2883849-2883916	+	AD	0.27846	0.14763	0.13083	1	K2	1.1312	nuclear factor Y, subunit C9	nuclear factor Y, subunit C9 (NF-YC9); CONTAINS InterPro DOMAIN/s: Histone-fold (InterPro:IPR009072), Transcription factor CBF/NF-Y/archaeal histone (InterPro:IPR003958); CONTAINS InterPro DOMAIN/s: Transcription factor CBF/NF-Y/archaeal histone (InterPro:IPR003958), Histone-fold (InterPro:IPR009072); BEST Arabidopsis thaliana protein match is: nuclear factor Y, subunit C3 (TAIR:AT1G54830.3)	Histone-fold | Transcription factor CBF/NF-Y/archaeal histone | Transcriptional activator NFYC/HAP5 subunit	NO
AT1G09160	19	1:2953075-2953162	-	RI	0.80635	0.57629	0.23005	0.977	K1	0.9972	Protein phosphatase 2C family protein	Protein phosphatase 2C family protein; FUNCTIONS IN: protein serine/threonine phosphatase activity, catalytic activity; LOCATED IN: plasma membrane; EXPRESSED IN: 23 plant structures; EXPRESSED DURING: 13 growth stages; CONTAINS InterPro DOMAIN/s: Protein phosphatase 2C-related (InterPro:IPR001932), Protein phosphatase 2C (InterPro:IPR015655), Protein phosphatase 2C, N-terminal (InterPro:IPR01404…	Protein phosphatase 2C | Protein phosphatase 2C (PP2C)-like domain	NO
AT1G09270	24	1:2997839-2997919	+	RI	0.92761	0.79305	0.13456	0.985	K1	0.8402	importin alpha isoform 4	importin alpha isoform 4 (IMPA-4); FUNCTIONS IN: protein transporter activity, binding; INVOLVED IN: intracellular protein transport, symbiont intracellular protein transport in host, host response to induction by symbiont of tumor, nodule or growth in host; EXPRESSED IN: 24 plant structures; LOCATED IN: nucleus, nuclear pore, cytoplasm; EXPRESSED DURING: 15 growth stages; CONTAINS InterPro DOMAI…	Armadillo | Armadillo-like helical | Armadillo-type fold | Importin subunit alpha | Importin-alpha, importin-beta-binding domain	NO
AT1G09980	22	1:3258771-3258864	-	RI	0.052221	0.1917	-0.13948	0.981	K3	2.0731	Putative serine esterase family protein	Putative serine esterase family protein; INVOLVED IN: biological_process unknown; LOCATED IN: mitochondrion; EXPRESSED IN: 22 plant structures; EXPRESSED DURING: 13 growth stages; CONTAINS InterPro DOMAIN/s: Protein of unknown function DUF3657 (InterPro:IPR022122), Protein of unknown function DUF676, hydrolase-like (InterPro:IPR007751); BEST Arabidopsis thaliana protein match is: Putative serine …	Alpha/Beta hydrolase fold | Domain of unknown function DUF676, lipase-like | Protein of unknown function DUF3657	NO
AT1G10070	4	1:3288321-3288430	+	RI	0.30495	0.11909	0.18586	0.984	K1	0.9488	branched-chain amino acid transaminase 2	branched-chain amino acid transaminase 2 (BCAT-2); FUNCTIONS IN: branched-chain-amino-acid transaminase activity, catalytic activity; INVOLVED IN: branched chain family amino acid metabolic process, metabolic process; LOCATED IN: chloroplast; EXPRESSED IN: 21 plant structures; EXPRESSED DURING: 14 growth stages; CONTAINS InterPro DOMAIN/s: Aminotransferase, class IV (InterPro:IPR001544), Aminotra…	Aminotransferase, class IV | Aminotransferase, class IV, conserved site | Branched-chain amino acid aminotransferase II	NO
AT1G10070	7	1:3288505-3288601	+	RI	0.33576	0.22866	0.10709	0.904	K2	1.15	branched-chain amino acid transaminase 2	branched-chain amino acid transaminase 2 (BCAT-2); FUNCTIONS IN: branched-chain-amino-acid transaminase activity, catalytic activity; INVOLVED IN: branched chain family amino acid metabolic process, metabolic process; LOCATED IN: chloroplast; EXPRESSED IN: 21 plant structures; EXPRESSED DURING: 14 growth stages; CONTAINS InterPro DOMAIN/s: Aminotransferase, class IV (InterPro:IPR001544), Aminotra…	Aminotransferase, class IV | Aminotransferase, class IV, conserved site | Branched-chain amino acid aminotransferase II	NO
AT1G10070	17	1:3289620-3289681	+	RI	0.30049	0.062479	0.23801	1	K1	0.9122	branched-chain amino acid transaminase 2	branched-chain amino acid transaminase 2 (BCAT-2); FUNCTIONS IN: branched-chain-amino-acid transaminase activity, catalytic activity; INVOLVED IN: branched chain family amino acid metabolic process, metabolic process; LOCATED IN: chloroplast; EXPRESSED IN: 21 plant structures; EXPRESSED DURING: 14 growth stages; CONTAINS InterPro DOMAIN/s: Aminotransferase, class IV (InterPro:IPR001544), Aminotra…	Aminotransferase, class IV | Aminotransferase, class IV, conserved site | Branched-chain amino acid aminotransferase II	NO
AT1G10070	19	1:3289778-3289855	+	RI	0.29501	0.064986	0.23002	1	K1	0.9304	branched-chain amino acid transaminase 2	branched-chain amino acid transaminase 2 (BCAT-2); FUNCTIONS IN: branched-chain-amino-acid transaminase activity, catalytic activity; INVOLVED IN: branched chain family amino acid metabolic process, metabolic process; LOCATED IN: chloroplast; EXPRESSED IN: 21 plant structures; EXPRESSED DURING: 14 growth stages; CONTAINS InterPro DOMAIN/s: Aminotransferase, class IV (InterPro:IPR001544), Aminotra…	Aminotransferase, class IV | Aminotransferase, class IV, conserved site | Branched-chain amino acid aminotransferase II	NO
AT1G10130	27	1:3318260-3318263	+	AD	0.66596	0.77877	-0.11281	0.939	K1	0.9418	endoplasmic reticulum-type calcium-transporting ATPase 3	endoplasmic reticulum-type calcium-transporting ATPase 3 (ECA3); FUNCTIONS IN: manganese-transporting ATPase activity, calcium-transporting ATPase activity, calmodulin binding; INVOLVED IN: manganese ion transport, calcium ion transport, root development, manganese ion homeostasis; LOCATED IN: endomembrane system, Golgi apparatus; EXPRESSED IN: 27 plant structures; EXPRESSED DURING: 13 growth sta…	Calcium-transporting P-type ATPase, subfamily IIA, SERCA-type | Cation-transporting P-type ATPase | Cation-transporting P-type ATPase, C-terminal | Cation-transporting P-type ATPase, N-terminal | HAD-like domain | P-type ATPase, transmembrane domain | P-type ATPase, A domain | P-type ATPase, cytoplasmic domain N | P-type ATPase, phosphorylation site	NO
AT1G10320	10	1:3387013-3387033	-	AA	0.49632	0.7314	-0.23508	0.956	K4	3.0002	Zinc finger C-x8-C-x5-C-x3-H type family protein	Zinc finger C-x8-C-x5-C-x3-H type family protein; FUNCTIONS IN: RNA binding, nucleotide binding, zinc ion binding, nucleic acid binding; LOCATED IN: nucleus; EXPRESSED IN: 22 plant structures; EXPRESSED DURING: 13 growth stages; CONTAINS InterPro DOMAIN/s: Zinc finger, CCCH-type (InterPro:IPR000571), RNA recognition motif, RNP-1 (InterPro:IPR000504), Nucleotide-binding, alpha-beta plait (InterPro…	Nucleotide-binding, alpha-beta plait | RNA recognition motif domain | RNA recognition motif domain, eukaryote | U2 auxiliary factor small subunit | Zinc finger, CCCH-type	NO
AT1G10320	9	1:3387221-3387250	-	AD	0.49894	0.74318	-0.24424	0.961	K4	3.0002	Zinc finger C-x8-C-x5-C-x3-H type family protein	Zinc finger C-x8-C-x5-C-x3-H type family protein; FUNCTIONS IN: RNA binding, nucleotide binding, zinc ion binding, nucleic acid binding; LOCATED IN: nucleus; EXPRESSED IN: 22 plant structures; EXPRESSED DURING: 13 growth stages; CONTAINS InterPro DOMAIN/s: Zinc finger, CCCH-type (InterPro:IPR000571), RNA recognition motif, RNP-1 (InterPro:IPR000504), Nucleotide-binding, alpha-beta plait (InterPro…	Nucleotide-binding, alpha-beta plait | RNA recognition motif domain | RNA recognition motif domain, eukaryote | U2 auxiliary factor small subunit | Zinc finger, CCCH-type	NO
AT1G10320	11	1:3386960-3387012	-	CE	0.72956	0.86968	-0.14012	0.939	K4	3.0002	Zinc finger C-x8-C-x5-C-x3-H type family protein	Zinc finger C-x8-C-x5-C-x3-H type family protein; FUNCTIONS IN: RNA binding, nucleotide binding, zinc ion binding, nucleic acid binding; LOCATED IN: nucleus; EXPRESSED IN: 22 plant structures; EXPRESSED DURING: 13 growth stages; CONTAINS InterPro DOMAIN/s: Zinc finger, CCCH-type (InterPro:IPR000571), RNA recognition motif, RNP-1 (InterPro:IPR000504), Nucleotide-binding, alpha-beta plait (InterPro…	Nucleotide-binding, alpha-beta plait | RNA recognition motif domain | RNA recognition motif domain, eukaryote | U2 auxiliary factor small subunit | Zinc finger, CCCH-type	NO
AT1G10320	13	1:3386597-3386671	-	CE	0.73161	0.86921	-0.1376	0.96	K4	3.0002	Zinc finger C-x8-C-x5-C-x3-H type family protein	Zinc finger C-x8-C-x5-C-x3-H type family protein; FUNCTIONS IN: RNA binding, nucleotide binding, zinc ion binding, nucleic acid binding; LOCATED IN: nucleus; EXPRESSED IN: 22 plant structures; EXPRESSED DURING: 13 growth stages; CONTAINS InterPro DOMAIN/s: Zinc finger, CCCH-type (InterPro:IPR000571), RNA recognition motif, RNP-1 (InterPro:IPR000504), Nucleotide-binding, alpha-beta plait (InterPro…	Nucleotide-binding, alpha-beta plait | RNA recognition motif domain | RNA recognition motif domain, eukaryote | U2 auxiliary factor small subunit | Zinc finger, CCCH-type	NO
AT1G10320	18	1:3386672-3386959	-	RI	0.59991	0.22536	0.37455	0.999	K5	3.9099	Zinc finger C-x8-C-x5-C-x3-H type family protein	Zinc finger C-x8-C-x5-C-x3-H type family protein; FUNCTIONS IN: RNA binding, nucleotide binding, zinc ion binding, nucleic acid binding; LOCATED IN: nucleus; EXPRESSED IN: 22 plant structures; EXPRESSED DURING: 13 growth stages; CONTAINS InterPro DOMAIN/s: Zinc finger, CCCH-type (InterPro:IPR000571), RNA recognition motif, RNP-1 (InterPro:IPR000504), Nucleotide-binding, alpha-beta plait (InterPro…	Nucleotide-binding, alpha-beta plait | RNA recognition motif domain | RNA recognition motif domain, eukaryote | U2 auxiliary factor small subunit | Zinc finger, CCCH-type	NO
AT1G10360	4	1:3396101-3396485	-	RI	0.40176	0.53135	-0.12959	0.934	K2	1.1697	glutathione S-transferase TAU 18	glutathione S-transferase TAU 18 (GSTU18); CONTAINS InterPro DOMAIN/s: Thioredoxin fold (InterPro:IPR012335), Glutathione S-transferase, C-terminal (InterPro:IPR004046), Glutathione S-transferase, C-terminal-like (InterPro:IPR010987), Glutathione S-transferase/chloride channel, C-terminal (InterPro:IPR017933), Glutathione S-transferase, N-terminal (InterPro:IPR004045), Thioredoxin-like fold (Inte…	Glutathione S-transferase, C-terminal | Glutathione S-transferase, C-terminal-like | Glutathione S-transferase, N-terminal | Thioredoxin-like fold	NO
AT1G10450	40	1:3437984-3438069	+	RI	0.14386	0.31548	-0.17161	0.92	K1	0.9559	SIN3-like 6	SIN3-like 6 (SNL6); INVOLVED IN: regulation of transcription, DNA-dependent; LOCATED IN: nucleus; EXPRESSED IN: cultured cell; CONTAINS InterPro DOMAIN/s: Histone deacetylase interacting (InterPro:IPR013194), Paired amphipathic helix (InterPro:IPR003822); BEST Arabidopsis thaliana protein match is: SIN3-like 5 (TAIR:AT1G59890.1)		NO
AT1G10570	22	1:3489674-3489752	+	AA	0.94295	0.83929	0.10366	0.995	K2	0.7999	Cysteine proteinases superfamily protein	OVERLY TOLERANT TO SALT 2 (OTS2); CONTAINS InterPro DOMAIN/s: Peptidase C48, SUMO/Sentrin/Ubl1 (InterPro:IPR003653); BEST Arabidopsis thaliana protein match is: UB-like protease 1D (TAIR:AT1G60220.1)	Peptidase C48, SUMO/Sentrin/Ubl1	NO
AT1G10600	3	1:3504359-3504392	+	CE	0.34164	0.18333	0.15831	0.991	K2	1.4557	associated molecule with the SH3 domain of STAM 2	associated molecule with the SH3 domain of STAM 2 (AMSH2); FUNCTIONS IN: molecular_function unknown; INVOLVED IN: ubiquitin-dependent protein catabolic process; LOCATED IN: chloroplast; LOCATED IN: mitochondrion; EXPRESSED IN: cultured cell; CONTAINS InterPro DOMAIN/s: Mov34/MPN/PAD-1 (InterPro:IPR000555); BEST Arabidopsis thaliana protein match is: associated molecule with the SH3 domain of STAM…	JAB1/MPN/MOV34 metalloenzyme domain	NO
AT1G10600	5	1:3504426-3504488	+	CE	0.63218	0.82826	-0.19608	0.998	K2	1.4557	associated molecule with the SH3 domain of STAM 2	associated molecule with the SH3 domain of STAM 2 (AMSH2); FUNCTIONS IN: molecular_function unknown; INVOLVED IN: ubiquitin-dependent protein catabolic process; LOCATED IN: chloroplast; LOCATED IN: mitochondrion; EXPRESSED IN: cultured cell; CONTAINS InterPro DOMAIN/s: Mov34/MPN/PAD-1 (InterPro:IPR000555); BEST Arabidopsis thaliana protein match is: associated molecule with the SH3 domain of STAM…	JAB1/MPN/MOV34 metalloenzyme domain	NO
AT1G10820	12	1:3602606-3602671	-	CE	0.11796	0.2256	-0.10765	0.929	K4	1.3768	Protein of unknown function (DUF3755)	Protein of unknown function (DUF3755); CONTAINS InterPro DOMAIN/s: Protein of unknown function DUF3755 (InterPro:IPR022228); BEST Arabidopsis thaliana protein match is: Protein of unknown function (DUF3755) (TAIR:AT1G60670.2)	Homeodomain-like | Protein of unknown function DUF3755	NO
AT1G10890	14	1:3628890-3628972	+	CE	0.1913	0.67793	-0.48663	1	K3	1.7374		unknown protein; FUNCTIONS IN: molecular_function unknown; INVOLVED IN: biological_process unknown; LOCATED IN: chloroplast; EXPRESSED IN: petal, flower, leaf; EXPRESSED DURING: LP.04 four leaves visible, 4 anthesis, petal differentiation and expansion stage; BEST Arabidopsis thaliana protein match is: unknown protein (TAIR:AT5G13340.1)		NO
AT1G10890	13	1:3628230-3628836	+	RI	0.1806	0.65587	-0.47528	1	K3	1.6881		unknown protein; FUNCTIONS IN: molecular_function unknown; INVOLVED IN: biological_process unknown; LOCATED IN: chloroplast; EXPRESSED IN: petal, flower, leaf; EXPRESSED DURING: LP.04 four leaves visible, 4 anthesis, petal differentiation and expansion stage; BEST Arabidopsis thaliana protein match is: unknown protein (TAIR:AT5G13340.1)		NO
AT1G10890	16	1:3628973-3629097	+	RI	0.12909	0.44942	-0.32033	1	K3	1.7339		unknown protein; FUNCTIONS IN: molecular_function unknown; INVOLVED IN: biological_process unknown; LOCATED IN: chloroplast; EXPRESSED IN: petal, flower, leaf; EXPRESSED DURING: LP.04 four leaves visible, 4 anthesis, petal differentiation and expansion stage; BEST Arabidopsis thaliana protein match is: unknown protein (TAIR:AT5G13340.1)		NO
AT1G10900	8	1:3636998-3637022	-	AD	0.33837	0.13336	0.20501	0.999	K3	1.4113	Phosphatidylinositol-4-phosphate 5-kinase family protein	Phosphatidylinositol-4-phosphate 5-kinase family protein; FUNCTIONS IN: 1-phosphatidylinositol-4-phosphate 5-kinase activity, phosphatidylinositol phosphate kinase activity, ATP binding; INVOLVED IN: phosphatidylinositol metabolic process; LOCATED IN: plasma membrane; EXPRESSED IN: 21 plant structures; EXPRESSED DURING: 13 growth stages; CONTAINS InterPro DOMAIN/s: Phosphatidylinositol-4-phosphat…	MORN motif | Phosphatidylinositol-4-phosphate 5-kinase | Phosphatidylinositol-4-phosphate 5-kinase, C-terminal | Phosphatidylinositol-4-phosphate 5-kinase, N-terminal domain | Phosphatidylinositol-4-phosphate 5-kinase, core | Phosphatidylinositol-4-phosphate 5-kinase, core, subgroup | Phosphatidylinositol-4-phosphate 5-kinase, plant	NO
AT1G10910	28	1:3643583-3643731	+	RI	0.24943	0.51205	-0.26262	0.999	K2	1.1062	Pentatricopeptide repeat (PPR) superfamily protein	Pentatricopeptide repeat (PPR) superfamily protein; CONTAINS InterPro DOMAIN/s: Pentatricopeptide repeat (InterPro:IPR002885); BEST Arabidopsis thaliana protein match is: plastid transcriptionally active 2 (TAIR:AT1G74850.1)	Pentatricopeptide repeat	NO
AT1G10920	11	1:3646353-3646502	-	RI	0.52307	0.22175	0.30132	0.998	K1	0.9998	NB-ARC domain-containing disease resistance protein	LOV1; FUNCTIONS IN: ATP binding; INVOLVED IN: defense response to fungus, response to molecule of fungal origin, defense response; LOCATED IN: cellular_component unknown; EXPRESSED IN: 14 plant structures; EXPRESSED DURING: 7 growth stages; CONTAINS InterPro DOMAIN/s: NB-ARC (InterPro:IPR002182), Disease resistance protein (InterPro:IPR000767); BEST Arabidopsis thaliana protein match is: Disease …	NB-ARC | P-loop containing nucleoside triphosphate hydrolase	NO
AT1G11280	6	1:3790648-3790724	-	RI	0.83092	0.26575	0.56517	0.993	K1	0.951	S-locus lectin protein kinase family protein	S-locus lectin protein kinase family protein; FUNCTIONS IN: in 6 functions; INVOLVED IN: protein amino acid phosphorylation, recognition of pollen; EXPRESSED IN: 23 plant structures; LOCATED IN: endomembrane system; EXPRESSED DURING: 15 growth stages; CONTAINS InterPro DOMAIN/s: Curculin-like (mannose-binding) lectin (InterPro:IPR001480), PAN-2 domain (InterPro:IPR013227), Apple-like (InterPro:IP…	Apple-like | Bulb-type lectin domain | Concanavalin A-like lectin/glucanase, subgroup | PAN-2 domain | Protein kinase domain | Protein kinase-like domain | S-locus glycoprotein | S-receptor-like serine/threonine-protein kinase | Serine-threonine/tyrosine-protein kinase catalytic domain | Serine/threonine-protein kinase, active site	NO
AT1G11330	5	1:3811690-3811783	+	RI	0.052559	0.24513	-0.19257	0.944	K1	0.9183	S-locus lectin protein kinase family protein	S-locus lectin protein kinase family protein; FUNCTIONS IN: in 6 functions; INVOLVED IN: protein amino acid phosphorylation, recognition of pollen; LOCATED IN: plasma membrane; EXPRESSED IN: 21 plant structures; EXPRESSED IN: 23 plant structures; EXPRESSED DURING: 13 growth stages; CONTAINS InterPro DOMAIN/s: Curculin-like (mannose-binding) lectin (InterPro:IPR001480), Apple-like (InterPro:IPR003…	Apple-like | Bulb-type lectin domain | Concanavalin A-like lectin/glucanase, subgroup | PAN-2 domain | Protein kinase domain | Protein kinase-like domain | S-locus glycoprotein | S-receptor-like serine/threonine-protein kinase | Serine/threonine-protein kinase, active site	NO
AT1G11330	13	1:3812470-3812567	+	RI	0.070961	0.26682	-0.19585	0.932	K1	0.9663	S-locus lectin protein kinase family protein	S-locus lectin protein kinase family protein; FUNCTIONS IN: in 6 functions; INVOLVED IN: protein amino acid phosphorylation, recognition of pollen; LOCATED IN: plasma membrane; EXPRESSED IN: 21 plant structures; EXPRESSED IN: 23 plant structures; EXPRESSED DURING: 13 growth stages; CONTAINS InterPro DOMAIN/s: Curculin-like (mannose-binding) lectin (InterPro:IPR001480), Apple-like (InterPro:IPR003…	Apple-like | Bulb-type lectin domain | Concanavalin A-like lectin/glucanase, subgroup | PAN-2 domain | Protein kinase domain | Protein kinase-like domain | S-locus glycoprotein | S-receptor-like serine/threonine-protein kinase | Serine/threonine-protein kinase, active site	NO
AT1G11330	15	1:3812806-3812875	+	RI	0.036394	0.14471	-0.10832	0.95	K1	0.7106	S-locus lectin protein kinase family protein	S-locus lectin protein kinase family protein; FUNCTIONS IN: in 6 functions; INVOLVED IN: protein amino acid phosphorylation, recognition of pollen; LOCATED IN: plasma membrane; EXPRESSED IN: 21 plant structures; EXPRESSED IN: 23 plant structures; EXPRESSED DURING: 13 growth stages; CONTAINS InterPro DOMAIN/s: Curculin-like (mannose-binding) lectin (InterPro:IPR001480), Apple-like (InterPro:IPR003…	Apple-like | Bulb-type lectin domain | Concanavalin A-like lectin/glucanase, subgroup | PAN-2 domain | Protein kinase domain | Protein kinase-like domain | S-locus glycoprotein | S-receptor-like serine/threonine-protein kinase | Serine/threonine-protein kinase, active site	NO
AT1G11330	17	1:3813027-3813107	+	RI	0.03972	0.24906	-0.20934	0.989	K1	0.8571	S-locus lectin protein kinase family protein	S-locus lectin protein kinase family protein; FUNCTIONS IN: in 6 functions; INVOLVED IN: protein amino acid phosphorylation, recognition of pollen; LOCATED IN: plasma membrane; EXPRESSED IN: 21 plant structures; EXPRESSED IN: 23 plant structures; EXPRESSED DURING: 13 growth stages; CONTAINS InterPro DOMAIN/s: Curculin-like (mannose-binding) lectin (InterPro:IPR001480), Apple-like (InterPro:IPR003…	Apple-like | Bulb-type lectin domain | Concanavalin A-like lectin/glucanase, subgroup | PAN-2 domain | Protein kinase domain | Protein kinase-like domain | S-locus glycoprotein | S-receptor-like serine/threonine-protein kinase | Serine/threonine-protein kinase, active site	NO
AT1G11591	6	1:3895701-3895801	+	AD	0.28976	0.070806	0.21896	0.971	K3	1.7858	hypothetical protein;(source:Araport11)			NO
AT1G11591	8	1:3895802-3895845	+	CE	0.66437	0.92756	-0.26319	0.961	K3	1.9647	hypothetical protein;(source:Araport11)			NO
AT1G11730	10	1:3958735-3958798	+	CE	0.90453	0.58832	0.31621	0.938	K1	0.9852	Galactosyltransferase family protein	Galactosyltransferase family protein; FUNCTIONS IN: transferase activity, transferring hexosyl groups, transferase activity, transferring glycosyl groups; INVOLVED IN: protein amino acid glycosylation; LOCATED IN: membrane; EXPRESSED IN: 19 plant structures; EXPRESSED DURING: 6 growth stages; CONTAINS InterPro DOMAIN/s: Glycosyl transferase, family 31 (InterPro:IPR002659); BEST Arabidopsis thalia…	Domain of unknown function DUF4094 | Glycosyl transferase, family 31	NO
AT1G12240	4	1:4154770-4155089	+	AA	0.29109	0.16879	0.1223	0.963	K1	0.938	Glycosyl hydrolases family 32 protein	ATBETAFRUCT4; FUNCTIONS IN: hydrolase activity, hydrolyzing O-glycosyl compounds, beta-fructofuranosidase activity; INVOLVED IN: sucrose catabolic process, using beta-fructofuranosidase, carbohydrate metabolic process; LOCATED IN: vacuole, plant-type cell wall; EXPRESSED IN: 25 plant structures; EXPRESSED DURING: 16 growth stages; CONTAINS InterPro DOMAIN/s: Protein of unknown function DUF3357 (I…	Beta-fructofuranosidase | Concanavalin A-like lectin/glucanases superfamily | Glycoside hydrolase, family 32 | Glycoside hydrolase, family 32, active site | Glycosyl hydrolase family 32, C-terminal | Glycosyl hydrolase family 32, N-terminal | Glycosyl hydrolase, five-bladed beta-propellor domain	NO
AT1G12240	3	1:4154439-4154661	+	AD	0.33586	0.13324	0.20263	0.955	K1	0.938	Glycosyl hydrolases family 32 protein	ATBETAFRUCT4; FUNCTIONS IN: hydrolase activity, hydrolyzing O-glycosyl compounds, beta-fructofuranosidase activity; INVOLVED IN: sucrose catabolic process, using beta-fructofuranosidase, carbohydrate metabolic process; LOCATED IN: vacuole, plant-type cell wall; EXPRESSED IN: 25 plant structures; EXPRESSED DURING: 16 growth stages; CONTAINS InterPro DOMAIN/s: Protein of unknown function DUF3357 (I…	Beta-fructofuranosidase | Concanavalin A-like lectin/glucanases superfamily | Glycoside hydrolase, family 32 | Glycoside hydrolase, family 32, active site | Glycosyl hydrolase family 32, C-terminal | Glycosyl hydrolase family 32, N-terminal | Glycosyl hydrolase, five-bladed beta-propellor domain	NO
AT1G12240	5	1:4154662-4154769	+	RI	0.2911	0.1125	0.17859	0.979	K3	1.8528	Glycosyl hydrolases family 32 protein	ATBETAFRUCT4; FUNCTIONS IN: hydrolase activity, hydrolyzing O-glycosyl compounds, beta-fructofuranosidase activity; INVOLVED IN: sucrose catabolic process, using beta-fructofuranosidase, carbohydrate metabolic process; LOCATED IN: vacuole, plant-type cell wall; EXPRESSED IN: 25 plant structures; EXPRESSED DURING: 16 growth stages; CONTAINS InterPro DOMAIN/s: Protein of unknown function DUF3357 (I…	Beta-fructofuranosidase | Concanavalin A-like lectin/glucanases superfamily | Glycoside hydrolase, family 32 | Glycoside hydrolase, family 32, active site | Glycosyl hydrolase family 32, C-terminal | Glycosyl hydrolase family 32, N-terminal | Glycosyl hydrolase, five-bladed beta-propellor domain	NO
AT1G12250	10	1:4159854-4159883	+	CE	0.86228	0.98795	-0.12567	1	K2	0.8927	Pentapeptide repeat-containing protein	Pentapeptide repeat-containing protein; FUNCTIONS IN: molecular_function unknown; INVOLVED IN: biological_process unknown; LOCATED IN: chloroplast thylakoid membrane, chloroplast thylakoid lumen, chloroplast; LOCATED IN: thylakoid, chloroplast thylakoid membrane, chloroplast thylakoid lumen, chloroplast; EXPRESSED IN: 22 plant structures; EXPRESSED DURING: 13 growth stages; CONTAINS InterPro DOMA…	Pentapeptide repeat	NO
AT1G12450	5	1:4244407-4244506	+	RI	0.98065	0.85235	0.1283	0.994	K1	0.6977	SNARE associated Golgi protein family	SNARE associated Golgi protein family; CONTAINS InterPro DOMAIN/s: SNARE associated Golgi protein (InterPro:IPR015414); BEST Arabidopsis thaliana protein match is: SNARE associated Golgi protein family (TAIR:AT4G22850.1)	SNARE associated Golgi protein	NO
AT1G12730	13	1:4335438-4335457	+	AA	0.91597	0.72855	0.18743	0.966	K2	1.934	GPI transamidase subunit PIG-U	GPI transamidase subunit PIG-U; FUNCTIONS IN: molecular_function unknown; INVOLVED IN: GPI anchor biosynthetic process; LOCATED IN: integral to membrane, endoplasmic reticulum membrane; EXPRESSED IN: 22 plant structures; EXPRESSED DURING: 13 growth stages; CONTAINS InterPro DOMAIN/s: GPI transamidase subunit PIG-U (InterPro:IPR009600); BEST Arabidopsis thaliana protein match is: GPI transamidase …	GPI transamidase subunit PIG-U	NO
AT1G12730	20	1:4336089-4336179	+	RI	0.081157	0.28094	-0.19979	0.905	K1	0.995	GPI transamidase subunit PIG-U	GPI transamidase subunit PIG-U; FUNCTIONS IN: molecular_function unknown; INVOLVED IN: GPI anchor biosynthetic process; LOCATED IN: integral to membrane, endoplasmic reticulum membrane; EXPRESSED IN: 22 plant structures; EXPRESSED DURING: 13 growth stages; CONTAINS InterPro DOMAIN/s: GPI transamidase subunit PIG-U (InterPro:IPR009600); BEST Arabidopsis thaliana protein match is: GPI transamidase …	GPI transamidase subunit PIG-U	NO
AT1G12930	16	1:4401775-4401778	-	AD	0.12388	0.23667	-0.11279	0.903	K2	1.6154	ARM repeat superfamily protein	ARM repeat superfamily protein; FUNCTIONS IN: binding; INVOLVED IN: biological_process unknown; LOCATED IN: cellular_component unknown; EXPRESSED IN: 23 plant structures; EXPRESSED DURING: 13 growth stages; CONTAINS InterPro DOMAIN/s: Exportin-1/Importin-beta-like (InterPro:IPR013598), Armadillo-type fold (InterPro:IPR016024); BEST Arabidopsis thaliana protein match is: ARM repeat superfamily pro…	Armadillo-like helical | Armadillo-type fold | Exportin-1/Importin-beta-like	NO
AT1G12930	42	1:4399736-4399913	-	RI	0.19237	0.064369	0.128	0.982	K2	0.996	ARM repeat superfamily protein	ARM repeat superfamily protein; FUNCTIONS IN: binding; INVOLVED IN: biological_process unknown; LOCATED IN: cellular_component unknown; EXPRESSED IN: 23 plant structures; EXPRESSED DURING: 13 growth stages; CONTAINS InterPro DOMAIN/s: Exportin-1/Importin-beta-like (InterPro:IPR013598), Armadillo-type fold (InterPro:IPR016024); BEST Arabidopsis thaliana protein match is: ARM repeat superfamily pro…	Armadillo-like helical | Armadillo-type fold | Exportin-1/Importin-beta-like	NO
AT1G13080	8	1:4460109-4460195	+	RI	0.47633	0.64566	-0.16933	0.916	K2	1.3734	cytochrome P450, family 71, subfamily B, polypeptide 2	cytochrome P450, family 71, subfamily B, polypeptide 2 (CYP71B2); FUNCTIONS IN: electron carrier activity, monooxygenase activity, iron ion binding, oxygen binding, heme binding; INVOLVED IN: response to cyclopentenone, heat acclimation; EXPRESSED IN: 24 plant structures; EXPRESSED DURING: 13 growth stages; CONTAINS InterPro DOMAIN/s: Cytochrome P450 (InterPro:IPR001128), Cytochrome P450, E-class…	Cytochrome P450 | Cytochrome P450, E-class, group I | Cytochrome P450, conserved site	NO
AT1G13150	2	1:4483370-4483464	-	RI	0.93099	0.50394	0.42706	0.99	K1	0.994	cytochrome P450, family 86, subfamily C, polypeptide 4	cytochrome P450, family 86, subfamily C, polypeptide 4 (CYP86C4); FUNCTIONS IN: electron carrier activity, monooxygenase activity, iron ion binding, oxygen binding, heme binding; INVOLVED IN: oxidation reduction; LOCATED IN: endomembrane system; EXPRESSED IN: petal, leaf whorl, sepal, flower; EXPRESSED DURING: 4 anthesis, petal differentiation and expansion stage; CONTAINS InterPro DOMAIN/s: Cyto…	Cytochrome P450 | Cytochrome P450, E-class, group I | Cytochrome P450, conserved site	NO
AT1G13220	16	1:4517394-4517572	+	RI	0.30967	0.63089	-0.32123	0.982	K2	1.2129	nuclear matrix constituent protein-related	LITTLE NUCLEI2 (LINC2); INVOLVED IN: nucleus organization; LOCATED IN: nucleoplasm; EXPRESSED IN: 15 plant structures; EXPRESSED DURING: 7 growth stages; BEST Arabidopsis thaliana protein match is: little nuclei3 (TAIR:AT1G68790.1)		NO
AT1G13350	14	1:4576143-4576238	-	AD	0.46079	0.7287	-0.26791	0.975	K4	2.1875	Protein kinase superfamily protein	Protein kinase superfamily protein; FUNCTIONS IN: protein serine/threonine kinase activity, protein kinase activity, ATP binding; INVOLVED IN: protein amino acid phosphorylation; LOCATED IN: nucleus, cytoplasm; EXPRESSED IN: male gametophyte, cultured cell, pollen tube; EXPRESSED IN: male gametophyte, pollen tube; EXPRESSED DURING: L mature pollen stage, M germinated pollen stage; CONTAINS InterP…	Protein kinase domain | Protein kinase-like domain | Serine/threonine-protein kinase, active site | Serine/threonine/dual specificity protein kinase, catalytic domain	NO
AT1G13350	20	1:4575962-4575995	-	CE	0.56865	0.852	-0.28334	0.988	K4	2.1875	Protein kinase superfamily protein	Protein kinase superfamily protein; FUNCTIONS IN: protein serine/threonine kinase activity, protein kinase activity, ATP binding; INVOLVED IN: protein amino acid phosphorylation; LOCATED IN: nucleus, cytoplasm; EXPRESSED IN: male gametophyte, cultured cell, pollen tube; EXPRESSED IN: male gametophyte, pollen tube; EXPRESSED DURING: L mature pollen stage, M germinated pollen stage; CONTAINS InterP…	Protein kinase domain | Protein kinase-like domain | Serine/threonine-protein kinase, active site | Serine/threonine/dual specificity protein kinase, catalytic domain	NO
AT1G13350	15	1:4576048-4576142	-	RI	0.44708	0.69323	-0.24615	0.943	K4	2.5027	Protein kinase superfamily protein	Protein kinase superfamily protein; FUNCTIONS IN: protein serine/threonine kinase activity, protein kinase activity, ATP binding; INVOLVED IN: protein amino acid phosphorylation; LOCATED IN: nucleus, cytoplasm; EXPRESSED IN: male gametophyte, cultured cell, pollen tube; EXPRESSED IN: male gametophyte, pollen tube; EXPRESSED DURING: L mature pollen stage, M germinated pollen stage; CONTAINS InterP…	Protein kinase domain | Protein kinase-like domain | Serine/threonine-protein kinase, active site | Serine/threonine/dual specificity protein kinase, catalytic domain	NO
AT1G13650	6	1:4681947-4682065	-	RI	0.8137	0.68952	0.12418	0.94	K3	2.0026		BEST Arabidopsis thaliana protein match is: 18S pre-ribosomal assembly protein gar2-related (TAIR:AT2G03810.4)		NO
AT1G13770	16	1:4723611-4723627	+	AA	0.88776	0.73584	0.15192	0.975	K2	0.9086	Protein of unknown function, DUF647	ROOT UV-B SENSITIVE 3 (RUS3); FUNCTIONS IN: molecular_function unknown; INVOLVED IN: biological_process unknown; LOCATED IN: cellular_component unknown; CONTAINS InterPro DOMAIN/s: Protein of unknown function DUF647 (InterPro:IPR006968); BEST Arabidopsis thaliana protein match is: Protein of unknown function, DUF647 (TAIR:AT3G45890.1)	Vitamin B6 photo-protection and homoeostasis	NO
AT1G13770	23	1:4723321-4723395	+	RI	0.34546	0.077092	0.26837	0.999	K3	2.4916	Protein of unknown function, DUF647	ROOT UV-B SENSITIVE 3 (RUS3); FUNCTIONS IN: molecular_function unknown; INVOLVED IN: biological_process unknown; LOCATED IN: cellular_component unknown; CONTAINS InterPro DOMAIN/s: Protein of unknown function DUF647 (InterPro:IPR006968); BEST Arabidopsis thaliana protein match is: Protein of unknown function, DUF647 (TAIR:AT3G45890.1)	Vitamin B6 photo-protection and homoeostasis	NO
AT1G13770	25	1:4723489-4723610	+	RI	0.33056	0.078221	0.25234	0.998	K3	2.4916	Protein of unknown function, DUF647	ROOT UV-B SENSITIVE 3 (RUS3); FUNCTIONS IN: molecular_function unknown; INVOLVED IN: biological_process unknown; LOCATED IN: cellular_component unknown; CONTAINS InterPro DOMAIN/s: Protein of unknown function DUF647 (InterPro:IPR006968); BEST Arabidopsis thaliana protein match is: Protein of unknown function, DUF647 (TAIR:AT3G45890.1)	Vitamin B6 photo-protection and homoeostasis	NO
AT1G13780	4	1:4725709-4725796	+	RI	0.096695	0.23071	-0.13402	0.92	K1	0.8113	F-box/RNI-like/FBD-like domains-containing protein	F-box/RNI-like/FBD-like domains-containing protein; CONTAINS InterPro DOMAIN/s: FBD (InterPro:IPR013596), F-box domain, cyclin-like (InterPro:IPR001810), F-box domain, Skp2-like (InterPro:IPR022364), FBD-like (InterPro:IPR006566), Leucine-rich repeat 2 (InterPro:IPR013101); BEST Arabidopsis thaliana protein match is: F-box/FBD-like domains containing protein (TAIR:AT5G27750.1)	F-box domain | FBD domain | Leucine-rich repeat 2	NO
AT1G13940	2	1:4766471-4766593	-	RI	0.60523	0.8954	-0.29017	0.977	K2	1.5076	Plant protein of unknown function (DUF863)	Plant protein of unknown function (DUF863); CONTAINS InterPro DOMAIN/s: Protein of unknown function DUF863, plant (InterPro:IPR008581); BEST Arabidopsis thaliana protein match is: Plant protein of unknown function (DUF863) (TAIR:AT1G69360.1)	Protein of unknown function DUF863, plant	NO
AT1G14030	4	1:4806887-4806891	-	AA	0.38444	0.2117	0.17274	0.983	K2	1.3632	Rubisco methyltransferase family protein	Rubisco methyltransferase family protein; FUNCTIONS IN: [ribulose-bisphosphate carboxylase]-lysine N-methyltransferase activity; LOCATED IN: chloroplast, chloroplast stroma; EXPRESSED IN: 20 plant structures; EXPRESSED DURING: 13 growth stages; CONTAINS InterPro DOMAIN/s: Rubisco methyltransferase (InterPro:IPR011192), SET domain (InterPro:IPR001214), Rubisco LSMT substrate-binding (InterPro:IPR0…	Rubisco LSMT methyltransferase, plant | Rubisco LSMT, substrate-binding domain | SET domain	NO
AT1G14070	4	1:4819490-4819620	+	RI	0.92067	0.64162	0.27905	0.977	K1	0.9544	fucosyltransferase 7	fucosyltransferase 7 (FUT7); FUNCTIONS IN: transferase activity, transferring glycosyl groups, fucosyltransferase activity; INVOLVED IN: cell wall biogenesis; LOCATED IN: endomembrane system, membrane; EXPRESSED IN: stem, cauline leaf, root; CONTAINS InterPro DOMAIN/s: Xyloglucan fucosyltransferase (InterPro:IPR004938); BEST Arabidopsis thaliana protein match is: fucosyltransferase 6 (TAIR:AT1G14…	Xyloglucan fucosyltransferase	NO
AT1G15215	15	1:5239234-5239294	+	RI	0.38028	0.19796	0.18232	0.963	K2	1.0455		BEST Arabidopsis thaliana protein match is: sequence-specific DNA binding transcription factors;sequence-specific DNA binding (TAIR:AT3G18380.1)		NO
AT1G15290	48	1:5259172-5259252	-	RI	0.45175	0.18759	0.26416	1	K1	0.9991	Tetratricopeptide repeat (TPR)-like superfamily protein	Tetratricopeptide repeat (TPR)-like superfamily protein; FUNCTIONS IN: binding; INVOLVED IN: biological_process unknown; LOCATED IN: cellular_component unknown; EXPRESSED IN: 24 plant structures; EXPRESSED DURING: 13 growth stages; CONTAINS InterPro DOMAIN/s: Tetratricopeptide-like helical (InterPro:IPR011990), Tetratricopeptide repeat-containing (InterPro:IPR013026), Tetratricopeptide repeat (In…	Clustered mitochondria protein, N-terminal | Tetratricopeptide repeat | Tetratricopeptide repeat-containing domain | Tetratricopeptide-like helical domain	NO
AT1G15350	11	1:5279190-5279194	-	AA	0.47627	0.59298	-0.1167	0.967	K3	1.891		unknown protein; FUNCTIONS IN: molecular_function unknown; INVOLVED IN: biological_process unknown; LOCATED IN: chloroplast; EXPRESSED IN: 22 plant structures; EXPRESSED DURING: 12 growth stages; BEST Arabidopsis thaliana protein match is: unknown protein (TAIR:AT3G15770.2)	Domain of unknown function DUF4050	NO
AT1G15750	8	1:5420539-5420573	-	CE	0.52662	0.27426	0.25236	0.995	K3	1.779	Transducin family protein / WD-40 repeat family protein	TOPLESS (TPL); FUNCTIONS IN: protein binding, transcription repressor activity, protein homodimerization activity; INVOLVED IN: xylem and phloem pattern formation, response to auxin stimulus, primary shoot apical meristem specification, jasmonic acid mediated signaling pathway; LOCATED IN: cytosol, nucleus; EXPRESSED IN: 27 plant structures; EXPRESSED DURING: 15 growth stages; CONTAINS InterPro D…	CTLH, C-terminal LisH motif | LisH dimerisation motif | Topless family | WD40 repeat | WD40 repeat, conserved site | WD40-repeat-containing domain | WD40/YVTN repeat-like-containing domain	NO
AT1G15960	32	1:5483770-5483846	-	RI	0.63296	0.85099	-0.21802	0.959	K4	2.5582	NRAMP metal ion transporter 6	NRAMP metal ion transporter 6 (NRAMP6); FUNCTIONS IN: inorganic anion transmembrane transporter activity, metal ion transmembrane transporter activity; INVOLVED IN: cellular metal ion homeostasis, metal ion transport; LOCATED IN: membrane; EXPRESSED IN: 12 plant structures; EXPRESSED DURING: LP.06 six leaves visible, LP.04 four leaves visible, 4 anthesis, petal differentiation and expansion stage…	NRAMP family	NO
AT1G16010	6	1:5497102-5497117	-	AA	0.2237	0.34432	-0.12062	0.926	K1	0.9612	magnesium transporter 2	magnesium transporter 2 (MGT2); FUNCTIONS IN: magnesium ion transmembrane transporter activity, metal ion transmembrane transporter activity; INVOLVED IN: metal ion transport, transmembrane transport; INVOLVED IN: transmembrane transport, metal ion transport; LOCATED IN: membrane; LOCATED IN: vacuole, membrane; EXPRESSED IN: 32 plant structures; EXPRESSED DURING: 14 growth stages; CONTAINS InterP…	Magnesium transporter MRS2/LPE10 | Mg2+ transporter protein, CorA-like/Zinc transport protein ZntB	NO
AT1G16040	9	1:5505312-5505354	+	CE	0.87349	0.97466	-0.10117	0.987	K5	2.1837		FUNCTIONS IN: molecular_function unknown; INVOLVED IN: GPI anchor biosynthetic process; LOCATED IN: integral to membrane, endoplasmic reticulum membrane; EXPRESSED IN: 24 plant structures; EXPRESSED DURING: 13 growth stages; CONTAINS InterPro DOMAIN/s: GPI biosynthesis protein Pig-F (InterPro:IPR009580)	GPI biosynthesis protein Pig-F	NO
AT1G16040	12	1:5505355-5505375	+	RI	0.06822	0.18201	-0.11379	0.947	K6	2.4079		FUNCTIONS IN: molecular_function unknown; INVOLVED IN: GPI anchor biosynthetic process; LOCATED IN: integral to membrane, endoplasmic reticulum membrane; EXPRESSED IN: 24 plant structures; EXPRESSED DURING: 13 growth stages; CONTAINS InterPro DOMAIN/s: GPI biosynthesis protein Pig-F (InterPro:IPR009580)	GPI biosynthesis protein Pig-F	NO
AT1G16260	6	1:5560984-5561010	-	AD	0.73054	0.87583	-0.14529	0.938	K3	1.769	Wall-associated kinase family protein	Wall-associated kinase family protein; FUNCTIONS IN: kinase activity; INVOLVED IN: protein amino acid phosphorylation; LOCATED IN: endomembrane system, integral to membrane; EXPRESSED IN: 19 plant structures; EXPRESSED DURING: 13 growth stages; CONTAINS InterPro DOMAIN/s: Wall-associated kinase (InterPro:IPR013695), EGF-like calcium-binding, conserved site (InterPro:IPR018097), Protein kinase, ca…	Concanavalin A-like lectin/glucanase, subgroup | EGF-like calcium-binding domain | EGF-like calcium-binding, conserved site | Protein kinase domain | Protein kinase-like domain | Serine-threonine/tyrosine-protein kinase catalytic domain | Serine/threonine-protein kinase, active site | Wall-associated receptor kinase | Wall-associated receptor kinase galacturonan-binding domain	NO
AT1G16270	2	1:5563201-5563364	+	AD	0.58863	0.37286	0.21577	0.901	K1	0.9896	Protein kinase superfamily protein with octicosapeptide/Phox/Bem1p domain	Protein kinase superfamily protein with octicosapeptide/Phox/Bem1p domain; FUNCTIONS IN: protein serine/threonine/tyrosine kinase activity, protein kinase activity; INVOLVED IN: protein amino acid phosphorylation; LOCATED IN: cytosol, nucleus; CONTAINS InterPro DOMAIN/s: Octicosapeptide/Phox/Bem1p (InterPro:IPR000270), Protein kinase, ATP binding site (InterPro:IPR017441), Protein kinase, catalyt…	Phox/Bem1p | Protein kinase domain | Protein kinase, ATP binding site | Protein kinase-like domain | Serine-threonine/tyrosine-protein kinase catalytic domain | Serine/threonine-protein kinase, active site	NO
AT1G16460	28	1:5620106-5620166	-	RI	0.17426	0.059239	0.11502	0.999	K1	0.673	rhodanese homologue 2	rhodanese homologue 2 (RDH2); FUNCTIONS IN: 3-mercaptopyruvate sulfurtransferase activity, thiosulfate sulfurtransferase activity; INVOLVED IN: sulfate transport, aging; LOCATED IN: cytosol, cytoplasm; EXPRESSED IN: 22 plant structures; EXPRESSED DURING: 13 growth stages; CONTAINS InterPro DOMAIN/s: Rhodanese-like (InterPro:IPR001763), Thiosulphate sulfurtransferase, conserved site (InterPro:IPR0…	Rhodanese-like domain | Thiosulphate sulfurtransferase, conserved site	NO
AT1G16540	10	1:5661523-5661568	+	CE	0.55157	0.95214	-0.40057	0.986	K1	0.9993	molybdenum cofactor sulfurase (LOS5) (ABA3)	ABA DEFICIENT 3 (ABA3); CONTAINS InterPro DOMAIN/s: Pyridoxal phosphate-dependent transferase, major domain (InterPro:IPR015424), MOSC, N-terminal beta barrel (InterPro:IPR005303), Aminotransferase, class V/Cysteine desulfurase (InterPro:IPR000192), Molybdenum cofactor sulfurase, C-terminal (InterPro:IPR005302), Pyridoxal phosphate-dependent transferase, major region, subdomain 1 (InterPro:IPR015…	Aminotransferase class V domain | MOSC, N-terminal beta barrel | Molybdenum cofactor sulfurase | Molybdenum cofactor sulfurase, C-terminal | Pyridoxal phosphate-dependent transferase | Pyridoxal phosphate-dependent transferase, major region, subdomain 1 | Pyridoxal phosphate-dependent transferase, major region, subdomain 2 | Pyruvate kinase-like, insert domain	NO
AT1G16650	11	1:5689612-5689616	+	AA	0.55723	0.22463	0.3326	0.957	K2	1.5072	S-adenosyl-L-methionine-dependent methyltransferases superfamily protein	S-adenosyl-L-methionine-dependent methyltransferases superfamily protein	Methyltransferase domain | S-adenosyl-L-methionine-dependent methyltransferase-like	NO
AT1G16960	5	1:5800032-5800161	+	RI	0.39553	0.50841	-0.11289	0.927	K2	1.262	Ubiquitin domain-containing protein	Ubiquitin domain-containing protein; FUNCTIONS IN: molecular_function unknown; INVOLVED IN: N-terminal protein myristoylation; LOCATED IN: cellular_component unknown; BEST Arabidopsis thaliana protein match is: Ubiquitin domain-containing protein (TAIR:AT1G53400.1)		NO
AT1G17110	10	1:5848200-5848211	-	AD	0.16448	0.30864	-0.14416	0.976	K1	0.9131	ubiquitin-specific protease 15	ubiquitin-specific protease 15 (UBP15); CONTAINS InterPro DOMAIN/s: Zinc finger, MYND-type (InterPro:IPR002893), Peptidase C19, ubiquitin carboxyl-terminal hydrolase 2, conserved site (InterPro:IPR018200), Peptidase C19, ubiquitin carboxyl-terminal hydrolase 2 (InterPro:IPR001394); BEST Arabidopsis thaliana protein match is: ubiquitin-specific protease 18 (TAIR:AT4G31670.1)	Peptidase C19, ubiquitin carboxyl-terminal hydrolase | Peptidase C19, ubiquitin carboxyl-terminal hydrolase, conserved site | Ubiquitin carboxyl-terminal hydrolase-like domain | Zinc finger, MYND-type	NO
AT1G17145	14	1:5861667-5861755	-	RI	0.4133	0.28703	0.12628	0.983	K1	0.9942	RING/U-box superfamily protein	RING/U-box superfamily protein; FUNCTIONS IN: zinc ion binding; INVOLVED IN: biological_process unknown; LOCATED IN: cellular_component unknown; EXPRESSED IN: 24 plant structures; EXPRESSED DURING: 15 growth stages; CONTAINS InterPro DOMAIN/s: Zinc finger, RING-type (InterPro:IPR001841); BEST Arabidopsis thaliana protein match is: RING/U-box superfamily protein (TAIR:AT1G78420.2)	Zinc finger, RING-type | Zinc finger, RING/FYVE/PHD-type	NO
AT1G17145	5	1:5862259-5862517	-	RI	0.19973	0.066679	0.13305	0.979	K1	0.7871	RING/U-box superfamily protein	RING/U-box superfamily protein; FUNCTIONS IN: zinc ion binding; INVOLVED IN: biological_process unknown; LOCATED IN: cellular_component unknown; EXPRESSED IN: 24 plant structures; EXPRESSED DURING: 15 growth stages; CONTAINS InterPro DOMAIN/s: Zinc finger, RING-type (InterPro:IPR001841); BEST Arabidopsis thaliana protein match is: RING/U-box superfamily protein (TAIR:AT1G78420.2)	Zinc finger, RING-type | Zinc finger, RING/FYVE/PHD-type	NO
AT1G17520	8	1:6025505-6025522	-	AD	0.48864	0.60111	-0.11247	0.908	K2	1.0637	Homeodomain-like/winged-helix DNA-binding family protein	Homeodomain-like/winged-helix DNA-binding family protein; FUNCTIONS IN: DNA binding, sequence-specific DNA binding transcription factor activity; INVOLVED IN: in 6 processes; LOCATED IN: nucleus, nucleosome; EXPRESSED IN: 11 plant structures; EXPRESSED DURING: 7 growth stages; CONTAINS InterPro DOMAIN/s: Winged helix-turn-helix transcription repressor DNA-binding (InterPro:IPR011991), SANT, DNA-b…		NO
AT1G17550	5	1:6034400-6034607	+	RI	0.68097	0.82176	-0.14079	0.994	K1	0.9347	homology to ABI2	homology to ABI2 (HAB2); FUNCTIONS IN: protein serine/threonine phosphatase activity, catalytic activity; INVOLVED IN: protein amino acid dephosphorylation; LOCATED IN: protein serine/threonine phosphatase complex; EXPRESSED IN: 23 plant structures; EXPRESSED DURING: 14 growth stages; CONTAINS InterPro DOMAIN/s: Protein phosphatase 2C, manganese/magnesium aspartate binding site (InterPro:IPR00022…	Protein phosphatase 2C | Protein phosphatase 2C (PP2C)-like domain | Protein phosphatase 2C, manganese/magnesium aspartate binding site	NO
AT1G17680	4	1:6076195-6076317	+	RI	0.64825	0.25237	0.39588	1	K1	0.9622	tetratricopeptide repeat (TPR)-containing protein	tetratricopeptide repeat (TPR)-containing protein; FUNCTIONS IN: binding; INVOLVED IN: biological_process unknown; LOCATED IN: cellular_component unknown; EXPRESSED IN: 22 plant structures; EXPRESSED DURING: 13 growth stages; CONTAINS InterPro DOMAIN/s: Tetratricopeptide-like helical (InterPro:IPR011990), Tetratricopeptide repeat-containing (InterPro:IPR013026), Tetratricopeptide repeat (InterPro…	Tetratricopeptide repeat | Tetratricopeptide repeat-containing domain | Tetratricopeptide-like helical domain	NO
AT1G17990	10	1:6192763-6192828	-	RI	0.21476	0.04623	0.16853	0.998	K1	0.8091	FMN-linked oxidoreductases superfamily protein	FMN-linked oxidoreductases superfamily protein; FUNCTIONS IN: oxidoreductase activity, FMN binding, catalytic activity; INVOLVED IN: metabolic process; CONTAINS InterPro DOMAIN/s: NADH:flavin oxidoreductase/NADH oxidase, N-terminal (InterPro:IPR001155), Aldolase-type TIM barrel (InterPro:IPR013785); BEST Arabidopsis thaliana protein match is: FMN-linked oxidoreductases superfamily protein (TAIR:A…	Aldolase-type TIM barrel | NADH:flavin oxidoreductase/NADH oxidase, N-terminal	NO
AT1G18090	25	1:6226774-6226952	+	RI	0.48932	0.12662	0.3627	0.994	K1	0.9999	5'-3' exonuclease family protein	5'-3' exonuclease family protein; FUNCTIONS IN: DNA binding, catalytic activity, nuclease activity; INVOLVED IN: DNA repair; LOCATED IN: cellular_component unknown; EXPRESSED IN: 22 plant structures; EXPRESSED DURING: 14 growth stages; CONTAINS InterPro DOMAIN/s: XPG conserved site (InterPro:IPR019974), XPG N-terminal (InterPro:IPR006085), DNA repair protein (XPGC)/yeast Rad (InterPro:IPR006084),…	5'-3' exonuclease, C-terminal domain | Helix-hairpin-helix motif, class 2 | PIN domain-like | XPG N-terminal | XPG conserved site | XPG-I domain	NO
AT1G18160	10	1:6252253-6252256	+	AA	0.71247	0.52532	0.18715	0.983	K1	0.9998	Protein kinase superfamily protein	Protein kinase superfamily protein; FUNCTIONS IN: protein serine/threonine/tyrosine kinase activity, kinase activity; INVOLVED IN: protein amino acid phosphorylation; LOCATED IN: plasma membrane; EXPRESSED IN: 22 plant structures; EXPRESSED DURING: 13 growth stages; CONTAINS InterPro DOMAIN/s: Protein kinase, ATP binding site (InterPro:IPR017441), Serine/threonine-protein kinase domain (InterPro:…	Protein kinase domain | Protein kinase, ATP binding site | Protein kinase-like domain | Serine-threonine/tyrosine-protein kinase catalytic domain | Serine/threonine-protein kinase, active site	NO
AT1G18270	35	1:6289541-6289603	-	RI	0.28531	0.063877	0.22144	0.992	K2	1.2083	ketose-bisphosphate aldolase class-II family protein	ketose-bisphosphate aldolase class-II family protein; FUNCTIONS IN: in 8 functions; INVOLVED IN: oxidation reduction, pentose-phosphate shunt, valine metabolic process, glycolysis, metabolic process; EXPRESSED IN: 23 plant structures; LOCATED IN: nucleus; EXPRESSED DURING: 13 growth stages; CONTAINS InterPro DOMAIN/s: Aldolase-type TIM barrel (InterPro:IPR013785), 6-phosphogluconate dehydrogenase…	3-hydroxyisobutyrate dehydrogenase-related, conserved site | 6-phosphogluconate dehydrogenase, C-terminal-like | 6-phosphogluconate dehydrogenase, NADP-binding | Aldolase-type TIM barrel | Dehydrogenase, multihelical | Ketose-bisphosphate aldolase, class-II | NAD(P)-binding domain | NADP-dependent 3-hydroxyisobutyrate dehydrogenase, NAD-binding domain | Protein of unknown function, DUF1537	NO
AT1G18335	12	1:6309529-6309587	-	AD	0.14158	0.27905	-0.13747	0.953	K2	1.3688	Acyl-CoA N-acyltransferases (NAT) superfamily protein	Acyl-CoA N-acyltransferases (NAT) superfamily protein; FUNCTIONS IN: N-acetyltransferase activity; INVOLVED IN: metabolic process; LOCATED IN: cellular_component unknown; CONTAINS InterPro DOMAIN/s: GCN5-related N-acetyltransferase, C-terminal (InterPro:IPR022610), GCN5-related N-acetyltransferase (InterPro:IPR000182), Acyl-CoA N-acyltransferase (InterPro:IPR016181)	Acyl-CoA N-acyltransferase | GNAT domain	NO
AT1G18335	19	1:6309458-6309528	-	RI	0.11739	0.25544	-0.13805	0.961	K2	1.3831	Acyl-CoA N-acyltransferases (NAT) superfamily protein	Acyl-CoA N-acyltransferases (NAT) superfamily protein; FUNCTIONS IN: N-acetyltransferase activity; INVOLVED IN: metabolic process; LOCATED IN: cellular_component unknown; CONTAINS InterPro DOMAIN/s: GCN5-related N-acetyltransferase, C-terminal (InterPro:IPR022610), GCN5-related N-acetyltransferase (InterPro:IPR000182), Acyl-CoA N-acyltransferase (InterPro:IPR016181)	Acyl-CoA N-acyltransferase | GNAT domain	NO
AT1G18340	17	1:6312036-6312142	-	RI	0.14114	0.030796	0.11034	0.99	K1	0.598	basal transcription factor complex subunit-related	basal transcription factor complex subunit-related; FUNCTIONS IN: general RNA polymerase II transcription factor activity; INVOLVED IN: DNA repair, regulation of transcription, DNA-dependent; LOCATED IN: core TFIIH complex; EXPRESSED IN: 17 plant structures; EXPRESSED DURING: 9 growth stages; CONTAINS InterPro DOMAIN/s: Transcription factor Tfb4 (InterPro:IPR004600)	TFIIH subunit Tfb4/p34	NO
AT1G18620	8	1:6410341-6410557	+	AA	0.38805	0.21977	0.16828	0.993	K3	1.5224		unknown protein; FUNCTIONS IN: molecular_function unknown; INVOLVED IN: biological_process unknown; LOCATED IN: cellular_component unknown; EXPRESSED IN: 22 plant structures; EXPRESSED DURING: 13 growth stages; BEST Arabidopsis thaliana protein match is: unknown protein (TAIR:AT1G74160.1)	Domain of unknown function DUF4378	NO
AT1G18620	7	1:6410217-6410340	+	RI	0.29919	0.1955	0.10369	0.947	K3	1.5324		unknown protein; FUNCTIONS IN: molecular_function unknown; INVOLVED IN: biological_process unknown; LOCATED IN: cellular_component unknown; EXPRESSED IN: 22 plant structures; EXPRESSED DURING: 13 growth stages; BEST Arabidopsis thaliana protein match is: unknown protein (TAIR:AT1G74160.1)	Domain of unknown function DUF4378	NO
AT1G18650	8	1:6419265-6419425	-	RI	0.26328	0.39333	-0.13005	0.926	K3	1.8168	plasmodesmata callose-binding protein 3	plasmodesmata callose-binding protein 3 (PDCB3); CONTAINS InterPro DOMAIN/s: X8 (InterPro:IPR012946); BEST Arabidopsis thaliana protein match is: glucan endo-1,3-beta-glucosidase-like protein 3 (TAIR:AT5G08000.1)	X8	NO
AT1G18650	6	1:6419460-6419778	-	RI	0.3058	0.45685	-0.15105	0.981	K3	1.8168	plasmodesmata callose-binding protein 3	plasmodesmata callose-binding protein 3 (PDCB3); CONTAINS InterPro DOMAIN/s: X8 (InterPro:IPR012946); BEST Arabidopsis thaliana protein match is: glucan endo-1,3-beta-glucosidase-like protein 3 (TAIR:AT5G08000.1)	X8	NO
AT1G18660	8	1:6421382-6421397	+	AA	0.42189	0.54037	-0.11848	0.938	K2	1.4276	zinc finger (C3HC4-type RING finger) family protein	zinc finger (C3HC4-type RING finger) family protein; FUNCTIONS IN: ATP-dependent peptidase activity, binding, zinc ion binding; INVOLVED IN: proteolysis; EXPRESSED IN: 22 plant structures; EXPRESSED DURING: 13 growth stages; CONTAINS InterPro DOMAIN/s: Peptidase S16, lon N-terminal (InterPro:IPR003111), Zinc finger, RING-type, conserved site (InterPro:IPR017907), Tetratricopeptide-like helical (I…	PUA-like domain | Peptidase S16, lon N-terminal | Tetratricopeptide-like helical domain | Zinc finger, RING-type | Zinc finger, RING-type, conserved site | Zinc finger, RING/FYVE/PHD-type	NO
AT1G18660	7	1:6421304-6421381	+	RI	0.36219	0.46983	-0.10764	0.914	K2	1.429	zinc finger (C3HC4-type RING finger) family protein	zinc finger (C3HC4-type RING finger) family protein; FUNCTIONS IN: ATP-dependent peptidase activity, binding, zinc ion binding; INVOLVED IN: proteolysis; EXPRESSED IN: 22 plant structures; EXPRESSED DURING: 13 growth stages; CONTAINS InterPro DOMAIN/s: Peptidase S16, lon N-terminal (InterPro:IPR003111), Zinc finger, RING-type, conserved site (InterPro:IPR017907), Tetratricopeptide-like helical (I…	PUA-like domain | Peptidase S16, lon N-terminal | Tetratricopeptide-like helical domain | Zinc finger, RING-type | Zinc finger, RING-type, conserved site | Zinc finger, RING/FYVE/PHD-type	NO
AT1G18720	7	1:6459296-6460169	-	AD	0.97143	0.86399	0.10744	0.999	K2	0.7567	Protein of unknown function (DUF962)	Protein of unknown function (DUF962); CONTAINS InterPro DOMAIN/s: Protein of unknown function DUF962 (InterPro:IPR009305); BEST Arabidopsis thaliana protein match is: Protein of unknown function (DUF962) (TAIR:AT1G74440.1)	Protein of unknown function DUF962	NO
AT1G18800	9	1:6481948-6481950	-	AA	0.71089	0.57632	0.13456	0.996	K1	0.9917	NAP1-related protein 2	NAP1-related protein 2 (NRP2); FUNCTIONS IN: chromatin binding, histone binding, DNA binding; INVOLVED IN: cell proliferation, cell differentiation, nucleosome assembly, lateral root formation; LOCATED IN: nucleus, cytoplasm; EXPRESSED IN: 24 plant structures; EXPRESSED DURING: 14 growth stages; CONTAINS InterPro DOMAIN/s: Nucleosome assembly protein (NAP) (InterPro:IPR002164); BEST Arabidopsis t…		NO
AT1G19130	2	1:6610095-6610419	-	RI	0.18382	0.34941	-0.16559	0.996	K1	0.9538		CONTAINS InterPro DOMAIN/s: Protein of unknown function DUF985 (InterPro:IPR009327), RmlC-like jelly roll fold (InterPro:IPR014710)	Protein of unknown function DUF985 | RmlC-like cupin domain | RmlC-like jelly roll fold	NO
AT1G19350	7	1:6688775-6688825	+	AA	0.68157	0.79109	-0.10953	0.998	K2	1.7977	Brassinosteroid signalling positive regulator (BZR1) family protein	BRI1-EMS-SUPPRESSOR 1 (BES1); CONTAINS InterPro DOMAIN/s: BZR1, transcriptional repressor (InterPro:IPR008540); BEST Arabidopsis thaliana protein match is: Brassinosteroid signalling positive regulator (BZR1) family protein (TAIR:AT1G75080.2)	BZR1, transcriptional repressor	NO
AT1G19350	8	1:6688826-6688827	+	AA	0.68139	0.79012	-0.10874	0.997	K2	1.7977	Brassinosteroid signalling positive regulator (BZR1) family protein	BRI1-EMS-SUPPRESSOR 1 (BES1); CONTAINS InterPro DOMAIN/s: BZR1, transcriptional repressor (InterPro:IPR008540); BEST Arabidopsis thaliana protein match is: Brassinosteroid signalling positive regulator (BZR1) family protein (TAIR:AT1G75080.2)	BZR1, transcriptional repressor	NO
AT1G19350	9	1:6688828-6688833	+	AA	0.68239	0.79164	-0.10924	0.997	K3	1.8367	Brassinosteroid signalling positive regulator (BZR1) family protein	BRI1-EMS-SUPPRESSOR 1 (BES1); CONTAINS InterPro DOMAIN/s: BZR1, transcriptional repressor (InterPro:IPR008540); BEST Arabidopsis thaliana protein match is: Brassinosteroid signalling positive regulator (BZR1) family protein (TAIR:AT1G75080.2)	BZR1, transcriptional repressor	NO
AT1G19396	8	1:6711528-6711607	+	RI	0.59633	0.40891	0.18742	0.985	K1	0.9992		unknown protein		NO
AT1G19720	6	1:6819819-6819897	-	RI	0.39694	0.22506	0.17189	0.916	K1	0.9963	Pentatricopeptide repeat (PPR-like) superfamily protein	Pentatricopeptide repeat (PPR-like) superfamily protein; INVOLVED IN: biological_process unknown; LOCATED IN: nucleus, chloroplast, cytoplasm; CONTAINS InterPro DOMAIN/s: Pentatricopeptide repeat (InterPro:IPR002885); BEST Arabidopsis thaliana protein match is: Tetratricopeptide repeat (TPR)-like superfamily protein (TAIR:AT3G57430.1)	Pentatricopeptide repeat | Tetratricopeptide-like helical domain	NO
AT1G19800	7	1:6846543-6846628	+	CE	0.10576	0.40377	-0.29801	1	K3	1.6619	trigalactosyldiacylglycerol 1	trigalactosyldiacylglycerol 1 (TGD1); FUNCTIONS IN: lipid transporter activity; INVOLVED IN: lipid transport; LOCATED IN: chloroplast outer membrane, chloroplast, chloroplast inner membrane, chloroplast envelope; EXPRESSED IN: 22 plant structures; EXPRESSED DURING: 13 growth stages; CONTAINS InterPro DOMAIN/s: Protein of unknown function DUF140 (InterPro:IPR003453)	Permease domain	NO
AT1G20540	17	1:7113890-7113951	+	AA	0.22176	0.35738	-0.13562	0.975	K3	1.6934	Transducin/WD40 repeat-like superfamily protein	Transducin/WD40 repeat-like superfamily protein; CONTAINS InterPro DOMAIN/s: WD40 repeat 2 (InterPro:IPR019782), WD40 repeat-like-containing domain (InterPro:IPR011046), WD40-repeat-containing domain (InterPro:IPR017986), WD40/YVTN repeat-like-containing domain (InterPro:IPR015943), WD40 repeat (InterPro:IPR001680), WD40 repeat, subgroup (InterPro:IPR019781); BEST Arabidopsis thaliana protein mat…	WD40 repeat | WD40-repeat-containing domain | WD40/YVTN repeat-like-containing domain	NO
AT1G20540	21	1:7113773-7113889	+	RI	0.21505	0.33054	-0.11549	0.957	K4	1.7147	Transducin/WD40 repeat-like superfamily protein	Transducin/WD40 repeat-like superfamily protein; CONTAINS InterPro DOMAIN/s: WD40 repeat 2 (InterPro:IPR019782), WD40 repeat-like-containing domain (InterPro:IPR011046), WD40-repeat-containing domain (InterPro:IPR017986), WD40/YVTN repeat-like-containing domain (InterPro:IPR015943), WD40 repeat (InterPro:IPR001680), WD40 repeat, subgroup (InterPro:IPR019781); BEST Arabidopsis thaliana protein mat…	WD40 repeat | WD40-repeat-containing domain | WD40/YVTN repeat-like-containing domain	NO
AT1G20770	8	1:7215733-7215815	-	RI	0.21026	0.092691	0.11757	0.968	K2	0.9445		unknown protein		NO
AT1G20810	15	1:7233179-7233301	+	RI	0.19194	0.090817	0.10113	0.986	K1	0.7703	FKBP-like peptidyl-prolyl cis-trans isomerase family protein	FKBP-like peptidyl-prolyl cis-trans isomerase family protein; FUNCTIONS IN: FK506 binding, peptidyl-prolyl cis-trans isomerase activity; INVOLVED IN: protein folding; LOCATED IN: thylakoid lumen, chloroplast thylakoid lumen, chloroplast; EXPRESSED IN: 21 plant structures; EXPRESSED DURING: 13 growth stages; CONTAINS InterPro DOMAIN/s: Peptidyl-prolyl cis-trans isomerase, FKBP-type (InterPro:IPR00…	Peptidyl-prolyl cis-trans isomerase, FKBP-type | Peptidyl-prolyl cis-trans isomerase, FKBP-type, domain	NO
AT1G20890	13	1:7266737-7266767	-	AD	0.69067	0.80367	-0.11301	0.943	K1	0.9158		unknown protein; FUNCTIONS IN: molecular_function unknown; INVOLVED IN: biological_process unknown; LOCATED IN: endomembrane system; EXPRESSED IN: 24 plant structures; EXPRESSED DURING: 14 growth stages; BEST Arabidopsis thaliana protein match is: unknown protein (TAIR:AT1G76480.2)		NO
AT1G21350	9	1:7478442-7478522	-	CE	0.88661	0.99276	-0.10614	1	K2	0.6058	Thioredoxin superfamily protein	Thioredoxin superfamily protein; FUNCTIONS IN: oxidoreductase activity, antioxidant activity; INVOLVED IN: cell redox homeostasis; LOCATED IN: chloroplast; EXPRESSED IN: 22 plant structures; CONTAINS InterPro DOMAIN/s: Thioredoxin fold (InterPro:IPR012335), Alkyl hydroperoxide reductase/ Thiol specific antioxidant/ Mal allergen (InterPro:IPR000866), Thioredoxin-like fold (InterPro:IPR012336); EXP…	Alkyl hydroperoxide reductase subunit C/ Thiol specific antioxidant | Thioredoxin-like fold	NO
AT1G21580	20	1:7558579-7558643	-	RI	0.47464	0.10174	0.3729	1	K1	0.9996	Zinc finger C-x8-C-x5-C-x3-H type family protein	Zinc finger C-x8-C-x5-C-x3-H type family protein; FUNCTIONS IN: zinc ion binding, nucleic acid binding; INVOLVED IN: biological_process unknown; LOCATED IN: cellular_component unknown; EXPRESSED IN: 23 plant structures; EXPRESSED DURING: 13 growth stages; CONTAINS InterPro DOMAIN/s: Zinc finger, CCCH-type (InterPro:IPR000571)		NO
AT1G21580	18	1:7558687-7558760	-	RI	0.42329	0.21756	0.20573	0.994	K1	0.9929	Zinc finger C-x8-C-x5-C-x3-H type family protein	Zinc finger C-x8-C-x5-C-x3-H type family protein; FUNCTIONS IN: zinc ion binding, nucleic acid binding; INVOLVED IN: biological_process unknown; LOCATED IN: cellular_component unknown; EXPRESSED IN: 23 plant structures; EXPRESSED DURING: 13 growth stages; CONTAINS InterPro DOMAIN/s: Zinc finger, CCCH-type (InterPro:IPR000571)		NO
AT1G21610	15	1:7576381-7576584	+	RI	0.13792	0.30031	-0.16239	0.967	K1	0.9622	wound-responsive family protein	wound-responsive family protein; FUNCTIONS IN: molecular_function unknown; INVOLVED IN: response to wounding; LOCATED IN: cellular_component unknown; EXPRESSED IN: 24 plant structures; EXPRESSED DURING: 14 growth stages; BEST Arabidopsis thaliana protein match is: unknown protein (TAIR:AT1G77310.1)	Hpc2-related domain | Ubinuclein/Yemanuclein	NO
AT1G21840	8	1:7667002-7667111	+	EI/RI	0.91974	0.74829	0.17145	0.999	K1	0.8239	urease accessory protein F	urease accessory protein F (UREF); FUNCTIONS IN: nickel ion binding; INVOLVED IN: nitrogen compound metabolic process, positive regulation of metalloenzyme activity; LOCATED IN: cellular_component unknown; EXPRESSED IN: 23 plant structures; EXPRESSED DURING: 13 growth stages; CONTAINS InterPro DOMAIN/s: Urease accessory protein UreF (InterPro:IPR002639)	Urease accessory protein UreF	NO
AT1G21840	5	1:7666570-7666843	+	RI	0.4005	0.67497	-0.27448	0.998	K1	0.9991	urease accessory protein F	urease accessory protein F (UREF); FUNCTIONS IN: nickel ion binding; INVOLVED IN: nitrogen compound metabolic process, positive regulation of metalloenzyme activity; LOCATED IN: cellular_component unknown; EXPRESSED IN: 23 plant structures; EXPRESSED DURING: 13 growth stages; CONTAINS InterPro DOMAIN/s: Urease accessory protein UreF (InterPro:IPR002639)	Urease accessory protein UreF	NO
AT1G21840	8	1:7667002-7667111	+	RI	0.91974	0.74829	0.17145	0.999	K1	0.8239	urease accessory protein F	urease accessory protein F (UREF); FUNCTIONS IN: nickel ion binding; INVOLVED IN: nitrogen compound metabolic process, positive regulation of metalloenzyme activity; LOCATED IN: cellular_component unknown; EXPRESSED IN: 23 plant structures; EXPRESSED DURING: 13 growth stages; CONTAINS InterPro DOMAIN/s: Urease accessory protein UreF (InterPro:IPR002639)	Urease accessory protein UreF	NO
AT1G21930	5	1:7713453-7713515	+	CE	0.85408	0.98136	-0.12728	0.971	K2	0.9677		unknown protein; BEST Arabidopsis thaliana protein match is: unknown protein (TAIR:AT3G42150.3)		NO
AT1G22020	15	1:7757141-7757354	+	RI	0.9926	0.71742	0.27519	1	K2	0.9669	serine hydroxymethyltransferase 6	serine hydroxymethyltransferase 6 (SHM6); FUNCTIONS IN: pyridoxal phosphate binding, glycine hydroxymethyltransferase activity, catalytic activity; INVOLVED IN: glycine metabolic process, L-serine metabolic process; LOCATED IN: cellular_component unknown; EXPRESSED IN: 23 plant structures; EXPRESSED DURING: 15 growth stages; CONTAINS InterPro DOMAIN/s: Pyridoxal phosphate-dependent transferase, m…	Pyridoxal phosphate-dependent transferase | Pyridoxal phosphate-dependent transferase, major region, subdomain 1 | Pyridoxal phosphate-dependent transferase, major region, subdomain 2 | Serine hydroxymethyltransferase | Serine hydroxymethyltransferase, pyridoxal phosphate binding site	NO
AT1G22060	14	1:7776224-7776296	-	EI/RI	0.9742	0.80763	0.16657	0.992	K1	0.7905		LOCATED IN: vacuole; EXPRESSED IN: 23 plant structures; EXPRESSED DURING: 13 growth stages; BEST Arabidopsis thaliana protein match is: FBD, F-box and Leucine Rich Repeat domains containing protein (TAIR:AT1G22000.1)	EEIG1/EHBP1 N-terminal domain	NO
AT1G22060	14	1:7776224-7776296	-	RI	0.9742	0.80763	0.16657	0.992	K1	0.7905		LOCATED IN: vacuole; EXPRESSED IN: 23 plant structures; EXPRESSED DURING: 13 growth stages; BEST Arabidopsis thaliana protein match is: FBD, F-box and Leucine Rich Repeat domains containing protein (TAIR:AT1G22000.1)	EEIG1/EHBP1 N-terminal domain	NO
AT1G22180	7	1:7829671-7829747	-	CE	0.82309	0.6162	0.20689	0.969	K3	2.363	Sec14p-like phosphatidylinositol transfer family protein	Sec14p-like phosphatidylinositol transfer family protein; CONTAINS InterPro DOMAIN/s: Cellular retinaldehyde-binding/triple function, C-terminal (InterPro:IPR001251); CONTAINS InterPro DOMAIN/s: Cellular retinaldehyde-binding/triple function, C-terminal (InterPro:IPR001251), Cellular retinaldehyde-binding/triple function, N-terminal (InterPro:IPR008273), Phosphatidylinositol transfer protein-like…	CRAL-TRIO domain | CRAL/TRIO, N-terminal domain	NO
AT1G22430	10	1:7919662-7919705	+	AA	0.055394	0.20117	-0.14578	1	K1	0.8013	GroES-like zinc-binding dehydrogenase family protein	GroES-like zinc-binding dehydrogenase family protein; FUNCTIONS IN: oxidoreductase activity, zinc ion binding; INVOLVED IN: oxidation reduction; LOCATED IN: cellular_component unknown; EXPRESSED IN: 21 plant structures; EXPRESSED DURING: 13 growth stages; CONTAINS InterPro DOMAIN/s: GroES-like (InterPro:IPR011032), Alcohol dehydrogenase GroES-like (InterPro:IPR013154), Alcohol dehydrogenase, zinc…	Alcohol dehydrogenase GroES-like | Alcohol dehydrogenase superfamily, zinc-type | Alcohol dehydrogenase, C-terminal | Alcohol dehydrogenase, zinc-type, conserved site | GroES (chaperonin 10)-like | NAD(P)-binding domain	NO
AT1G22430	14	1:7919750-7919831	+	EI/RI	0.93946	0.81907	0.1204	1	K1	0.7241	GroES-like zinc-binding dehydrogenase family protein	GroES-like zinc-binding dehydrogenase family protein; FUNCTIONS IN: oxidoreductase activity, zinc ion binding; INVOLVED IN: oxidation reduction; LOCATED IN: cellular_component unknown; EXPRESSED IN: 21 plant structures; EXPRESSED DURING: 13 growth stages; CONTAINS InterPro DOMAIN/s: GroES-like (InterPro:IPR011032), Alcohol dehydrogenase GroES-like (InterPro:IPR013154), Alcohol dehydrogenase, zinc…	Alcohol dehydrogenase GroES-like | Alcohol dehydrogenase superfamily, zinc-type | Alcohol dehydrogenase, C-terminal | Alcohol dehydrogenase, zinc-type, conserved site | GroES (chaperonin 10)-like | NAD(P)-binding domain	NO
AT1G22430	14	1:7919750-7919831	+	RI	0.93946	0.81907	0.1204	1	K1	0.7241	GroES-like zinc-binding dehydrogenase family protein	GroES-like zinc-binding dehydrogenase family protein; FUNCTIONS IN: oxidoreductase activity, zinc ion binding; INVOLVED IN: oxidation reduction; LOCATED IN: cellular_component unknown; EXPRESSED IN: 21 plant structures; EXPRESSED DURING: 13 growth stages; CONTAINS InterPro DOMAIN/s: GroES-like (InterPro:IPR011032), Alcohol dehydrogenase GroES-like (InterPro:IPR013154), Alcohol dehydrogenase, zinc…	Alcohol dehydrogenase GroES-like | Alcohol dehydrogenase superfamily, zinc-type | Alcohol dehydrogenase, C-terminal | Alcohol dehydrogenase, zinc-type, conserved site | GroES (chaperonin 10)-like | NAD(P)-binding domain	NO
AT1G22640	8	1:8006629-8006708	+	RI	0.1898	0.31755	-0.12774	0.999	K2	1.3376	myb domain protein 3	myb domain protein 3 (MYB3); CONTAINS InterPro DOMAIN/s: SANT, DNA-binding (InterPro:IPR001005), Homeodomain-like (InterPro:IPR009057), Myb, DNA-binding (InterPro:IPR014778), HTH transcriptional regulator, Myb-type, DNA-binding (InterPro:IPR017930), Homeodomain-related (InterPro:IPR012287), Myb transcription factor (InterPro:IPR015495); BEST Arabidopsis thaliana protein match is: myb domain prote…	Homeodomain-like | Myb domain | SANT/Myb domain	NO
AT1G22740	2	1:8049393-8049419	+	CE	0.79614	0.9071	-0.11095	0.926	K2	1.4221	RAB GTPase homolog G3B	RAB GTPase homolog G3B (RABG3B); FUNCTIONS IN: GTP binding; INVOLVED IN: intracellular protein transport, signal transduction, nucleocytoplasmic transport, protein transport, small GTPase mediated signal transduction; LOCATED IN: vacuole; EXPRESSED IN: 21 plant structures; EXPRESSED DURING: 12 growth stages; CONTAINS InterPro DOMAIN/s: Ran GTPase (InterPro:IPR002041), Ras (InterPro:IPR013753), Ra…	P-loop containing nucleoside triphosphate hydrolase | Small GTP-binding protein domain | Small GTPase superfamily | Small GTPase superfamily, Rab type	NO
AT1G22750	11	1:8052610-8052614	+	AA	0.47764	0.33153	0.14611	1	K2	1.9535		unknown protein; CONTAINS InterPro DOMAIN/s: Protein of unknown function DUF1475 (InterPro:IPR009943); FUNCTIONS IN: molecular_function unknown; INVOLVED IN: biological_process unknown; LOCATED IN: vacuole; EXPRESSED IN: 23 plant structures; EXPRESSED DURING: 15 growth stages	Protein of unknown function DUF1475	NO
AT1G22750	12	1:8052615-8052662	+	AA	0.62682	0.49235	0.13447	0.999	K2	1.9535		unknown protein; CONTAINS InterPro DOMAIN/s: Protein of unknown function DUF1475 (InterPro:IPR009943); FUNCTIONS IN: molecular_function unknown; INVOLVED IN: biological_process unknown; LOCATED IN: vacuole; EXPRESSED IN: 23 plant structures; EXPRESSED DURING: 15 growth stages	Protein of unknown function DUF1475	NO
AT1G22790	5	1:8070159-8070164	+	AA	0.54322	0.42312	0.1201	0.914	K2	1.3032		unknown protein; FUNCTIONS IN: molecular_function unknown; INVOLVED IN: biological_process unknown; LOCATED IN: plasma membrane; EXPRESSED IN: 22 plant structures; EXPRESSED DURING: 13 growth stages; BEST Arabidopsis thaliana protein match is: unknown protein (TAIR:AT1G34010.1)		NO
AT1G22870	13	1:8090643-8090766	+	RI	0.06912	0.19813	-0.12901	0.933	K1	0.7554	Protein kinase family protein with ARM repeat domain	Protein kinase family protein with ARM repeat domain; FUNCTIONS IN: protein serine/threonine kinase activity, binding, protein kinase activity, kinase activity, ATP binding; INVOLVED IN: protein amino acid phosphorylation; LOCATED IN: cellular_component unknown; EXPRESSED IN: 23 plant structures; EXPRESSED DURING: 13 growth stages; CONTAINS InterPro DOMAIN/s: Protein kinase, catalytic domain (Int…	Armadillo-like helical | Armadillo-type fold | Protein kinase domain | Protein kinase-like domain	NO
AT1G22910	16	1:8107593-8107612	+	AA	0.26185	0.13872	0.12313	0.968	K1	0.8453	RNA-binding (RRM/RBD/RNP motifs) family protein	RNA-binding (RRM/RBD/RNP motifs) family protein; FUNCTIONS IN: RNA binding, nucleotide binding, nucleic acid binding; INVOLVED IN: biological_process unknown; LOCATED IN: cellular_component unknown; EXPRESSED IN: 22 plant structures; EXPRESSED DURING: 13 growth stages; CONTAINS InterPro DOMAIN/s: RNA recognition motif, RNP-1 (InterPro:IPR000504), Nucleotide-binding, alpha-beta plait (InterPro:IPR…	Nucleotide-binding, alpha-beta plait | RNA recognition motif domain	NO
AT1G23020	12	1:8152862-8152870	-	AA	0.59358	0.70962	-0.11604	0.931	K3	1.7346	ferric reduction oxidase 3	ferric reduction oxidase 3 (FRO3); FUNCTIONS IN: ferric-chelate reductase activity; INVOLVED IN: oxidation reduction; LOCATED IN: integral to membrane, membrane; EXPRESSED IN: 18 plant structures; EXPRESSED DURING: 9 growth stages; CONTAINS InterPro DOMAIN/s: Ferredoxin reductase-type FAD-binding domain (InterPro:IPR017927), Ferric reductase, NAD binding (InterPro:IPR013121), FAD-binding 8 (Inter…	FAD-binding 8 | Ferredoxin reductase-type FAD-binding domain | Ferric reductase transmembrane component-like domain | Ferric reductase, NAD binding	NO
AT1G23080	17	1:8180336-8180452	-	RI	0.66575	0.88494	-0.21919	0.93	K1	0.9767	Auxin efflux carrier family protein	PIN-FORMED 7 (PIN7); FUNCTIONS IN: auxin:hydrogen symporter activity, transporter activity, auxin efflux transmembrane transporter activity; INVOLVED IN: response to cyclopentenone, root development, pattern specification process, auxin polar transport, longitudinal axis specification; LOCATED IN: plasma membrane, membrane; EXPRESSED IN: 24 plant structures; EXPRESSED DURING: 13 growth stages; CO…	Auxin efflux carrier | Auxin efflux carrier, plant type	NO
AT1G23360	13	1:8296242-8296253	-	AD	0.33951	0.52767	-0.18816	1	K1	0.9985	S-adenosyl-L-methionine-dependent methyltransferases superfamily protein	MENG; CONTAINS InterPro DOMAIN/s: UbiE/COQ5 methyltransferase (InterPro:IPR004033); BEST Arabidopsis thaliana protein match is: S-adenosyl-L-methionine-dependent methyltransferases superfamily protein (TAIR:AT5G57300.3)	S-adenosyl-L-methionine-dependent methyltransferase-like | UbiE/COQ5 methyltransferase | UbiE/COQ5 methyltransferase, conserved site	NO
AT1G23360	11	1:8296343-8296418	-	RI	0.18052	0.34217	-0.16165	0.996	K3	1.4395	S-adenosyl-L-methionine-dependent methyltransferases superfamily protein	MENG; CONTAINS InterPro DOMAIN/s: UbiE/COQ5 methyltransferase (InterPro:IPR004033); BEST Arabidopsis thaliana protein match is: S-adenosyl-L-methionine-dependent methyltransferases superfamily protein (TAIR:AT5G57300.3)	S-adenosyl-L-methionine-dependent methyltransferase-like | UbiE/COQ5 methyltransferase | UbiE/COQ5 methyltransferase, conserved site	NO
AT1G24260	11	1:8594201-8594242	-	CE	0.76479	0.9485	-0.18371	0.974	K1	0.799	K-box region and MADS-box transcription factor family protein	SEPALLATA3 (SEP3); CONTAINS InterPro DOMAIN/s: Transcription factor, MADS-box (InterPro:IPR002100), Transcription factor, K-box (InterPro:IPR002487); FUNCTIONS IN: protein binding, DNA binding, sequence-specific DNA binding transcription factor activity; BEST Arabidopsis thaliana protein match is: K-box region and MADS-box transcription factor family protein (TAIR:AT3G02310.1); INVOLVED IN: in 6 …	Transcription factor, K-box | Transcription factor, MADS-box	NO
AT1G24706	77	1:8755027-8755126	+	RI	0.30418	0.073767	0.23042	1	K1	0.908	THO2	THO2; FUNCTIONS IN: molecular_function unknown; INVOLVED IN: biological_process unknown; LOCATED IN: cellular_component unknown; EXPRESSED IN: 23 plant structures; EXPRESSED IN: 24 plant structures; EXPRESSED DURING: 13 growth stages; CONTAINS InterPro DOMAIN/s: THO complex, subunitTHOC2, C-region (InterPro:IPR021418), THO complex, subunitTHOC2, N-region (InterPro:IPR021726)	Signal transduction histidine kinase EnvZ-like, dimerisation/phosphoacceptor domain | THO complex, subunitTHOC2, C-terminal | THO complex, subunitTHOC2, N-terminal	NO
AT1G24825	4	1:8777014-8777260	+	CE	0.26388	0.3731	-0.10922	1	K3	1.4309				NO
AT1G25230	4	1:8842027-8842094	-	RI	0.24911	0.10521	0.1439	0.999	K4	0.9488	Calcineurin-like metallo-phosphoesterase superfamily protein	Calcineurin-like metallo-phosphoesterase superfamily protein; FUNCTIONS IN: hydrolase activity, protein serine/threonine phosphatase activity; INVOLVED IN: biological_process unknown; LOCATED IN: endomembrane system; EXPRESSED IN: 22 plant structures; EXPRESSED DURING: 13 growth stages; CONTAINS InterPro DOMAIN/s: Metallophosphoesterase (InterPro:IPR004843); BEST Arabidopsis thaliana protein matc…	Acid phosphatase, type 5 | Calcineurin-like phosphoesterase domain, apaH type | Metallo-dependent phosphatase-like	NO
AT1G26170	46	1:9050068-9050173	-	RI	0.10877	0.24354	-0.13477	0.954	K1	0.8699	ARM repeat superfamily protein	ARM repeat superfamily protein; FUNCTIONS IN: protein transporter activity, binding; INVOLVED IN: intracellular protein transport, protein import into nucleus, docking; LOCATED IN: nucleus, nuclear pore, cytoplasm; EXPRESSED IN: 22 plant structures; EXPRESSED DURING: 13 growth stages; CONTAINS InterPro DOMAIN/s: Importin-beta, N-terminal (InterPro:IPR001494), Armadillo-like helical (InterPro:IPR0…	Armadillo-like helical | Armadillo-type fold | Importin-beta, N-terminal domain	NO
AT1G26208	12	1:9067381-9067425	-	CE	0.91665	0.77914	0.13751	0.997	K2	1.4406	other RNA			NO
AT1G26208	18	1:9066861-9066974	-	RI	0.7821	0.91744	-0.13535	0.996	K3	1.5397	other RNA			NO
AT1G26208	16	1:9067022-9067151	-	RI	0.83988	0.94156	-0.10168	0.997	K3	1.5397	other RNA			NO
AT1G26210	4	1:9067381-9067425	+	CE	0.85694	0.65568	0.20126	0.999	K2	1.4182	SOB five-like 1	SOB five-like 1 (SOFL1); BEST Arabidopsis thaliana protein match is: SOB five-like 2 (TAIR:AT1G68870.1)		NO
AT1G26210	5	1:9067426-9067487	+	RI	0.87048	0.67237	0.19811	1	K2	1.2843	SOB five-like 1	SOB five-like 1 (SOFL1); BEST Arabidopsis thaliana protein match is: SOB five-like 2 (TAIR:AT1G68870.1)		NO
AT1G26230	7	1:9075032-9075035	-	AA	0.4599	0.67043	-0.21053	0.929	K2	1.5345	TCP-1/cpn60 chaperonin family protein	TCP-1/cpn60 chaperonin family protein; FUNCTIONS IN: ATP binding; INVOLVED IN: protein refolding, cellular protein metabolic process; EXPRESSED IN: 22 plant structures; LOCATED IN: chloroplast; EXPRESSED DURING: 13 growth stages; CONTAINS InterPro DOMAIN/s: Chaperonin Cpn60/TCP-1 (InterPro:IPR002423), Chaperonin Cpn60 (InterPro:IPR001844); BEST Arabidopsis thaliana protein match is: chaperonin 60…	Chaperonin Cpn60 | Chaperonin Cpn60/TCP-1 | GroEL-like apical domain | GroEL-like equatorial domain	NO
AT1G26230	28	1:9072940-9073015	-	RI	0.17349	0.06336	0.11013	0.936	K1	0.7593	TCP-1/cpn60 chaperonin family protein	TCP-1/cpn60 chaperonin family protein; FUNCTIONS IN: ATP binding; INVOLVED IN: protein refolding, cellular protein metabolic process; EXPRESSED IN: 22 plant structures; LOCATED IN: chloroplast; EXPRESSED DURING: 13 growth stages; CONTAINS InterPro DOMAIN/s: Chaperonin Cpn60/TCP-1 (InterPro:IPR002423), Chaperonin Cpn60 (InterPro:IPR001844); BEST Arabidopsis thaliana protein match is: chaperonin 60…	Chaperonin Cpn60 | Chaperonin Cpn60/TCP-1 | GroEL-like apical domain | GroEL-like equatorial domain	NO
AT1G26230	26	1:9073121-9073196	-	RI	0.77283	0.21889	0.55394	1	K1	0.841	TCP-1/cpn60 chaperonin family protein	TCP-1/cpn60 chaperonin family protein; FUNCTIONS IN: ATP binding; INVOLVED IN: protein refolding, cellular protein metabolic process; EXPRESSED IN: 22 plant structures; LOCATED IN: chloroplast; EXPRESSED DURING: 13 growth stages; CONTAINS InterPro DOMAIN/s: Chaperonin Cpn60/TCP-1 (InterPro:IPR002423), Chaperonin Cpn60 (InterPro:IPR001844); BEST Arabidopsis thaliana protein match is: chaperonin 60…	Chaperonin Cpn60 | Chaperonin Cpn60/TCP-1 | GroEL-like apical domain | GroEL-like equatorial domain	NO
AT1G26440	18	1:9145286-9145300	-	AD	0.51048	0.86148	-0.351	1	K4	2.6204	ureide permease 5	ureide permease 5 (UPS5); FUNCTIONS IN: xanthine transmembrane transporter activity, uracil transmembrane transporter activity, allantoin uptake transmembrane transporter activity; LOCATED IN: endomembrane system; EXPRESSED IN: 31 plant structures; INVOLVED IN: xanthine transport, uracil transport, allantoin transport; EXPRESSED DURING: 13 growth stages; BEST Arabidopsis thaliana protein match is…	Ureide permease	NO
AT1G26440	23	1:9145196-9145199	-	EI/RI	0.44934	0.70318	-0.25385	1	K4	2.695	ureide permease 5	ureide permease 5 (UPS5); FUNCTIONS IN: xanthine transmembrane transporter activity, uracil transmembrane transporter activity, allantoin uptake transmembrane transporter activity; LOCATED IN: endomembrane system; EXPRESSED IN: 31 plant structures; INVOLVED IN: xanthine transport, uracil transport, allantoin transport; EXPRESSED DURING: 13 growth stages; BEST Arabidopsis thaliana protein match is…	Ureide permease	NO
AT1G26440	23	1:9145196-9145199	-	RI	0.44934	0.70318	-0.25385	1	K4	2.695	ureide permease 5	ureide permease 5 (UPS5); FUNCTIONS IN: xanthine transmembrane transporter activity, uracil transmembrane transporter activity, allantoin uptake transmembrane transporter activity; LOCATED IN: endomembrane system; EXPRESSED IN: 31 plant structures; INVOLVED IN: xanthine transport, uracil transport, allantoin transport; EXPRESSED DURING: 13 growth stages; BEST Arabidopsis thaliana protein match is…	Ureide permease	NO
AT1G26440	18	1:9145341-9145412	-	RI	0.61627	0.3426	0.27367	0.988	K6	3.3903	ureide permease 5	ureide permease 5 (UPS5); FUNCTIONS IN: xanthine transmembrane transporter activity, uracil transmembrane transporter activity, allantoin uptake transmembrane transporter activity; LOCATED IN: endomembrane system; EXPRESSED IN: 31 plant structures; INVOLVED IN: xanthine transport, uracil transport, allantoin transport; EXPRESSED DURING: 13 growth stages; BEST Arabidopsis thaliana protein match is…	Ureide permease	NO
AT1G26440	11	1:9145735-9145984	-	RI	0.51385	0.32593	0.18792	0.957	K4	2.1324	ureide permease 5	ureide permease 5 (UPS5); FUNCTIONS IN: xanthine transmembrane transporter activity, uracil transmembrane transporter activity, allantoin uptake transmembrane transporter activity; LOCATED IN: endomembrane system; EXPRESSED IN: 31 plant structures; INVOLVED IN: xanthine transport, uracil transport, allantoin transport; EXPRESSED DURING: 13 growth stages; BEST Arabidopsis thaliana protein match is…	Ureide permease	NO
AT1G26640	18	1:9208227-9208320	-	RI	0.52463	0.24021	0.28442	1	K1	1	Amino acid kinase family protein	Amino acid kinase family protein; FUNCTIONS IN: molecular_function unknown; INVOLVED IN: cellular amino acid biosynthetic process; LOCATED IN: cellular_component unknown; EXPRESSED IN: 23 plant structures; EXPRESSED DURING: 13 growth stages; CONTAINS InterPro DOMAIN/s: Aspartate/glutamate/uridylate kinase (InterPro:IPR001048)	Aspartate/glutamate/uridylate kinase	NO
AT1G27520	19	1:9560477-9560508	+	AA	0.78372	0.91376	-0.13005	0.97	K2	1.5507	Glycosyl hydrolase family 47 protein	Glycosyl hydrolase family 47 protein; FUNCTIONS IN: mannosyl-oligosaccharide 1,2-alpha-mannosidase activity, alpha-mannosidase activity, calcium ion binding; INVOLVED IN: protein amino acid N-linked glycosylation; LOCATED IN: endomembrane system, membrane; EXPRESSED IN: 22 plant structures; EXPRESSED DURING: 13 growth stages; CONTAINS InterPro DOMAIN/s: Glycoside hydrolase, family 47 (InterPro:IP…	Glycoside hydrolase, family 47	NO
AT1G27520	11	1:9559013-9559085	+	RI	0.32496	0.11906	0.2059	0.989	K1	0.9487	Glycosyl hydrolase family 47 protein	Glycosyl hydrolase family 47 protein; FUNCTIONS IN: mannosyl-oligosaccharide 1,2-alpha-mannosidase activity, alpha-mannosidase activity, calcium ion binding; INVOLVED IN: protein amino acid N-linked glycosylation; LOCATED IN: endomembrane system, membrane; EXPRESSED IN: 22 plant structures; EXPRESSED DURING: 13 growth stages; CONTAINS InterPro DOMAIN/s: Glycoside hydrolase, family 47 (InterPro:IP…	Glycoside hydrolase, family 47	NO
AT1G27520	25	1:9560334-9560476	+	RI	0.55575	0.78706	-0.23132	0.988	K2	1.5425	Glycosyl hydrolase family 47 protein	Glycosyl hydrolase family 47 protein; FUNCTIONS IN: mannosyl-oligosaccharide 1,2-alpha-mannosidase activity, alpha-mannosidase activity, calcium ion binding; INVOLVED IN: protein amino acid N-linked glycosylation; LOCATED IN: endomembrane system, membrane; EXPRESSED IN: 22 plant structures; EXPRESSED DURING: 13 growth stages; CONTAINS InterPro DOMAIN/s: Glycoside hydrolase, family 47 (InterPro:IP…	Glycoside hydrolase, family 47	NO
AT1G27540	10	1:9566152-9566590	-	RI	0.43846	0.65366	-0.2152	0.956	K1	0.9945	Protein of unknown function (DUF295)	Protein of unknown function (DUF295); FUNCTIONS IN: molecular_function unknown; INVOLVED IN: biological_process unknown; EXPRESSED IN: male gametophyte, pollen tube; EXPRESSED DURING: L mature pollen stage, M germinated pollen stage; CONTAINS InterPro DOMAIN/s: Protein of unknown function DUF295 (InterPro:IPR005174); BEST Arabidopsis thaliana protein match is: Protein of unknown function (DUF295)…	Protein of unknown function DUF295	NO
AT1G27590	13	1:9593852-9594283	+	RI	0.66863	0.88632	-0.21768	0.905	K2	1.4862		CONTAINS InterPro DOMAIN/s: Protein of unknown function DUF3453 (InterPro:IPR021850); BEST Arabidopsis thaliana protein match is: phosphatidylinositol 3- and 4-kinase family protein (TAIR:AT1G27570.1)		NO
AT1G27595	32	1:9599701-9599934	+	RI	0.17081	0.054417	0.1164	0.942	K3	0.9051		CONTAINS InterPro DOMAIN/s: Symplekin tight junction protein C-terminal (InterPro:IPR022075); BEST Arabidopsis thaliana protein match is: HEAT repeat-containing protein (TAIR:AT5G01400.1)	Armadillo-type fold | Symplekin C-terminal | Symplekin/Pta1	NO
AT1G27630	10	1:9612067-9612429	+	CE	0.56597	0.70344	-0.13746	0.916	K4	1.9787	cyclin T 1;3	cyclin T 1;3 (CYCT1;3); CONTAINS InterPro DOMAIN/s: Cyclin-like (InterPro:IPR011028), Transcription regulator cyclin (InterPro:IPR015429), Cyclin-related (InterPro:IPR013763), Cyclin, N-terminal (InterPro:IPR006671), Cyclin (InterPro:IPR006670); BEST Arabidopsis thaliana protein match is: Cyclin family protein (TAIR:AT5G45190.1)	Cyclin C/H/T/L | Cyclin, N-terminal | Cyclin-like	NO
AT1G27630	9	1:9611877-9612008	+	RI	0.47841	0.65908	-0.18067	0.952	K4	1.9787	cyclin T 1;3	cyclin T 1;3 (CYCT1;3); CONTAINS InterPro DOMAIN/s: Cyclin-like (InterPro:IPR011028), Transcription regulator cyclin (InterPro:IPR015429), Cyclin-related (InterPro:IPR013763), Cyclin, N-terminal (InterPro:IPR006671), Cyclin (InterPro:IPR006670); BEST Arabidopsis thaliana protein match is: Cyclin family protein (TAIR:AT5G45190.1)	Cyclin C/H/T/L | Cyclin, N-terminal | Cyclin-like	NO
AT1G27840	6	1:9695768-9695891	-	EI/RI	0.94201	0.75829	0.18372	0.998	K1	0.8727	Transducin/WD40 repeat-like superfamily protein	ATCSA-1; CONTAINS InterPro DOMAIN/s: WD40 repeat 2 (InterPro:IPR019782), WD40 repeat, conserved site (InterPro:IPR019775), WD40 repeat (InterPro:IPR001680), G-protein beta WD-40 repeat, region (InterPro:IPR020472), WD40 repeat-like-containing domain (InterPro:IPR011046), WD40-repeat-containing domain (InterPro:IPR017986), WD40/YVTN repeat-like-containing domain (InterPro:IPR015943), WD40 repeat, …	G-protein beta WD-40 repeat | WD40 repeat | WD40 repeat, conserved site | WD40-repeat-containing domain | WD40/YVTN repeat-like-containing domain	NO
AT1G27840	6	1:9695768-9695891	-	RI	0.94201	0.75829	0.18372	0.998	K1	0.8727	Transducin/WD40 repeat-like superfamily protein	ATCSA-1; CONTAINS InterPro DOMAIN/s: WD40 repeat 2 (InterPro:IPR019782), WD40 repeat, conserved site (InterPro:IPR019775), WD40 repeat (InterPro:IPR001680), G-protein beta WD-40 repeat, region (InterPro:IPR020472), WD40 repeat-like-containing domain (InterPro:IPR011046), WD40-repeat-containing domain (InterPro:IPR017986), WD40/YVTN repeat-like-containing domain (InterPro:IPR015943), WD40 repeat, …	G-protein beta WD-40 repeat | WD40 repeat | WD40 repeat, conserved site | WD40-repeat-containing domain | WD40/YVTN repeat-like-containing domain	NO
AT1G27920	3	1:9727028-9727161	+	AD	0.41329	0.30411	0.10918	0.918	K2	1.2326	microtubule-associated protein 65-8	microtubule-associated protein 65-8 (MAP65-8); CONTAINS InterPro DOMAIN/s: Microtubule-associated protein, MAP65/ASE1-type (InterPro:IPR007145); BEST Arabidopsis thaliana protein match is: microtubule-associated protein 65-2 (TAIR:AT4G26760.1)	Microtubule-associated protein, MAP65/Ase1/PRC1	NO
AT1G27980	22	1:9751656-9751739	+	RI	0.13073	0.020603	0.11012	0.998	K3	1.4522	dihydrosphingosine phosphate lyase	dihydrosphingosine phosphate lyase (DPL1); FUNCTIONS IN: pyridoxal phosphate binding, carboxy-lyase activity, catalytic activity; INVOLVED IN: sphingolipid catabolic process, cellular amino acid metabolic process; LOCATED IN: endoplasmic reticulum, membrane; EXPRESSED IN: 23 plant structures; EXPRESSED DURING: 13 growth stages; CONTAINS InterPro DOMAIN/s: Pyridoxal phosphate-dependent transferase…	Pyridoxal phosphate-dependent decarboxylase | Pyridoxal phosphate-dependent transferase | Pyridoxal phosphate-dependent transferase, major region, subdomain 1	NO
AT1G28060	6	1:9779900-9779904	+	EI/AA	0.92208	0.56789	0.35419	1	K2	1.3484	Pre-mRNA-splicing factor 3	Pre-mRNA-splicing factor 3; CONTAINS InterPro DOMAIN/s: Pre-mRNA-splicing factor 3 (InterPro:IPR013881); BEST Arabidopsis thaliana protein match is: Pre-mRNA-splicing factor 3 (TAIR:AT3G55930.1)	Domain of unknown function DUF1115 | Pre-mRNA-splicing factor 3 | U4/U6 small nuclear ribonucleoprotein Prp3	NO
AT1G28060	5	1:9779826-9779899	+	EI/RI	0.9212	0.48354	0.43766	1	K2	1.3484	Pre-mRNA-splicing factor 3	Pre-mRNA-splicing factor 3; CONTAINS InterPro DOMAIN/s: Pre-mRNA-splicing factor 3 (InterPro:IPR013881); BEST Arabidopsis thaliana protein match is: Pre-mRNA-splicing factor 3 (TAIR:AT3G55930.1)	Domain of unknown function DUF1115 | Pre-mRNA-splicing factor 3 | U4/U6 small nuclear ribonucleoprotein Prp3	NO
AT1G28060	5	1:9779826-9779899	+	RI	0.9212	0.48354	0.43766	1	K2	1.3484	Pre-mRNA-splicing factor 3	Pre-mRNA-splicing factor 3; CONTAINS InterPro DOMAIN/s: Pre-mRNA-splicing factor 3 (InterPro:IPR013881); BEST Arabidopsis thaliana protein match is: Pre-mRNA-splicing factor 3 (TAIR:AT3G55930.1)	Domain of unknown function DUF1115 | Pre-mRNA-splicing factor 3 | U4/U6 small nuclear ribonucleoprotein Prp3	NO
AT1G28090	18	1:9797569-9797590	+	AA	0.7933	0.93373	-0.14044	0.934	K2	1.0878	Polynucleotide adenylyltransferase family protein	Polynucleotide adenylyltransferase family protein; FUNCTIONS IN: RNA binding, nucleotidyltransferase activity; INVOLVED IN: RNA processing; LOCATED IN: cellular_component unknown; EXPRESSED IN: 22 plant structures; EXPRESSED DURING: 13 growth stages; CONTAINS InterPro DOMAIN/s: Poly A polymerase, head domain (InterPro:IPR002646); BEST Arabidopsis thaliana protein match is: Polynucleotide adenylyl…	Poly A polymerase, head domain	NO
AT1G28240	15	1:9869805-9869987	-	AA	0.49362	0.083263	0.41036	1	K2	1.4853	Protein of unknown function (DUF616)	Protein of unknown function (DUF616); CONTAINS InterPro DOMAIN/s: Protein of unknown function DUF616 (InterPro:IPR006852); BEST Arabidopsis thaliana protein match is: Protein of unknown function (DUF616) (TAIR:AT1G53040.2)	Protein of unknown function DUF616	NO
AT1G28320	15	1:9922666-9922707	-	AA	0.12437	0.23628	-0.11191	0.948	K1	0.8231	protease-related	DEG15; CONTAINS InterPro DOMAIN/s: Serine/cysteine peptidase, trypsin-like (InterPro:IPR009003); BEST Arabidopsis thaliana protein match is: DegP protease 1 (TAIR:AT3G27925.1)	Trypsin-like cysteine/serine peptidase domain	NO
AT1G28560	7	1:10040589-10040645	-	EI/RI	0.61979	0.2922	0.3276	0.952	K2	1.487	snRNA activating complex family protein	SHOOT REDIFFERENTIATION DEFECTIVE 2 (SRD2); FUNCTIONS IN: DNA binding; INVOLVED IN: snRNA transcription, organ morphogenesis; LOCATED IN: nucleus; EXPRESSED IN: 22 plant structures; EXPRESSED DURING: 13 growth stages; CONTAINS InterPro DOMAIN/s: snRNA-activating protein complex, subunit 3, C-terminal (InterPro:IPR022042)	snRNA-activating protein complex, subunit 3	NO
AT1G28560	7	1:10040589-10040645	-	RI	0.61979	0.2922	0.3276	0.952	K2	1.487	snRNA activating complex family protein	SHOOT REDIFFERENTIATION DEFECTIVE 2 (SRD2); FUNCTIONS IN: DNA binding; INVOLVED IN: snRNA transcription, organ morphogenesis; LOCATED IN: nucleus; EXPRESSED IN: 22 plant structures; EXPRESSED DURING: 13 growth stages; CONTAINS InterPro DOMAIN/s: snRNA-activating protein complex, subunit 3, C-terminal (InterPro:IPR022042)	snRNA-activating protein complex, subunit 3	NO
AT1G28610	13	1:10054511-10054580	-	RI	0.3827	0.52936	-0.14666	0.947	K5	2.6216	GDSL-like Lipase/Acylhydrolase superfamily protein	GDSL-like Lipase/Acylhydrolase superfamily protein; FUNCTIONS IN: lipase activity, carboxylesterase activity; FUNCTIONS IN: lipase activity, hydrolase activity, acting on ester bonds, carboxylesterase activity; INVOLVED IN: lipid metabolic process; LOCATED IN: endomembrane system; EXPRESSED IN: 22 plant structures; BEST Arabidopsis thaliana protein match is: GDSL-like Lipase/Acylhydrolase superfa…	Lipase, GDSL | SGNH hydrolase-type esterase domain	NO
AT1G28960	13	1:10109786-10109811	-	AA	0.80069	0.62578	0.17491	0.998	K2	1.5858	nudix hydrolase homolog 15	nudix hydrolase homolog 15 (NUDX15); CONTAINS InterPro DOMAIN/s: NUDIX hydrolase domain-like (InterPro:IPR015797), NUDIX hydrolase domain (InterPro:IPR000086), NUDIX hydrolase, AtNUDT22 (InterPro:IPR017397); CONTAINS InterPro DOMAIN/s: NUDIX hydrolase domain-like (InterPro:IPR015797), NUDIX hydrolase, AtNUDT22 (InterPro:IPR017397), NUDIX hydrolase domain (InterPro:IPR000086); BEST Arabidopsis tha…	NUDIX hydrolase domain | NUDIX hydrolase domain-like | NUDIX hydrolase, AtNUDT22	NO
AT1G28960	11	1:10109862-10109925	-	AD	0.25675	0.54809	-0.29134	1	K2	1.5858	nudix hydrolase homolog 15	nudix hydrolase homolog 15 (NUDX15); CONTAINS InterPro DOMAIN/s: NUDIX hydrolase domain-like (InterPro:IPR015797), NUDIX hydrolase domain (InterPro:IPR000086), NUDIX hydrolase, AtNUDT22 (InterPro:IPR017397); CONTAINS InterPro DOMAIN/s: NUDIX hydrolase domain-like (InterPro:IPR015797), NUDIX hydrolase, AtNUDT22 (InterPro:IPR017397), NUDIX hydrolase domain (InterPro:IPR000086); BEST Arabidopsis tha…	NUDIX hydrolase domain | NUDIX hydrolase domain-like | NUDIX hydrolase, AtNUDT22	NO
AT1G28960	11	1:10110023-10110161	-	RI	0.31611	0.47884	-0.16274	0.998	K2	1.2208	nudix hydrolase homolog 15	nudix hydrolase homolog 15 (NUDX15); CONTAINS InterPro DOMAIN/s: NUDIX hydrolase domain-like (InterPro:IPR015797), NUDIX hydrolase domain (InterPro:IPR000086), NUDIX hydrolase, AtNUDT22 (InterPro:IPR017397); CONTAINS InterPro DOMAIN/s: NUDIX hydrolase domain-like (InterPro:IPR015797), NUDIX hydrolase, AtNUDT22 (InterPro:IPR017397), NUDIX hydrolase domain (InterPro:IPR000086); BEST Arabidopsis tha…	NUDIX hydrolase domain | NUDIX hydrolase domain-like | NUDIX hydrolase, AtNUDT22	NO
AT1G29040	4	1:10134778-10134797	+	AD	0.75203	0.86098	-0.10894	0.979	K1	0.8234		unknown protein; CONTAINS InterPro DOMAIN/s: Conserved hypothetical protein CHP02058 (InterPro:IPR011719); LOCATED IN: chloroplast, vacuole; EXPRESSED IN: 22 plant structures; EXPRESSED DURING: 13 growth stages	Conserved hypothetical protein CHP02058 | Tubulin/FtsZ, 2-layer sandwich domain	NO
AT1G29120	28	1:10177043-10177134	+	RI	0.1982	0.058392	0.1398	0.998	K3	0.8669	Hydrolase-like protein family	Hydrolase-like protein family; FUNCTIONS IN: molecular_function unknown; INVOLVED IN: biological_process unknown; LOCATED IN: chloroplast; EXPRESSED IN: 22 plant structures; EXPRESSED DURING: 13 growth stages; CONTAINS InterPro DOMAIN/s: Protein of unknown function DUF676, hydrolase-like (InterPro:IPR007751); BEST Arabidopsis thaliana protein match is: alpha/beta-Hydrolases superfamily protein (T…	Alpha/Beta hydrolase fold | Domain of unknown function DUF676, lipase-like	NO
AT1G29355	6	1:10275220-10275293	+	RI	0.36325	0.17155	0.1917	0.9	K2	1.4606		unknown protein		NO
AT1G29410	6	1:10299581-10299643	-	CE	0.89626	0.72997	0.16628	0.933	K1	0.9024	phosphoribosylanthranilate isomerase 3	phosphoribosylanthranilate isomerase 3 (PAI3); CONTAINS InterPro DOMAIN/s: N-(5&apos;phosphoribosyl)anthranilate isomerase (PRAI) (InterPro:IPR001240), Aldolase-type TIM barrel (InterPro:IPR013785), Ribulose-phosphate binding barrel (InterPro:IPR011060); BEST Arabidopsis thaliana protein match is: phosphoribosylanthranilate isomerase 1 (TAIR:AT1G07780.4)	Aldolase-type TIM barrel | N-(5'phosphoribosyl) anthranilate isomerase (PRAI) like domain | Ribulose-phosphate binding barrel	NO
AT1G29560	11	1:10334382-10334447	+	AD	0.8179	0.49147	0.32643	0.97	K1	0.9673	Zinc finger C-x8-C-x5-C-x3-H type family protein	Zinc finger C-x8-C-x5-C-x3-H type family protein; FUNCTIONS IN: zinc ion binding, nucleic acid binding; LOCATED IN: cellular_component unknown; CONTAINS InterPro DOMAIN/s: Zinc finger, CCCH-type (InterPro:IPR000571); BEST Arabidopsis thaliana protein match is: Zinc finger C-x8-C-x5-C-x3-H type family protein (TAIR:AT1G29570.1)	Zinc finger, CCCH-type	NO
AT1G29630	20	1:10351798-10351984	+	RI	0.31085	0.103	0.20785	0.944	K1	0.8841	5'-3' exonuclease family protein	5'-3' exonuclease family protein; FUNCTIONS IN: DNA binding, catalytic activity, nuclease activity; FUNCTIONS IN: nuclease activity; INVOLVED IN: DNA repair; EXPRESSED IN: 10 plant structures; EXPRESSED DURING: 4 anthesis, F mature embryo stage, petal differentiation and expansion stage, E expanded cotyledon stage, D bilateral stage; CONTAINS InterPro DOMAIN/s: DNA repair protein (XPGC)/yeast Rad…	5'-3' exonuclease, C-terminal domain | Helix-hairpin-helix motif, class 2 | PIN domain-like | XPG N-terminal | XPG conserved site | XPG-I domain	NO
AT1G29700	2	1:10386924-10387370	-	RI	0.17998	0.060036	0.11994	0.977	K2	0.7587	Metallo-hydrolase/oxidoreductase superfamily protein	Metallo-hydrolase/oxidoreductase superfamily protein; FUNCTIONS IN: molecular_function unknown; INVOLVED IN: biological_process unknown; LOCATED IN: chloroplast; EXPRESSED IN: 22 plant structures; EXPRESSED DURING: 13 growth stages	Beta-lactamase-like	NO
AT1G30450	32	1:10769115-10769243	+	RI	0.86461	0.66166	0.20295	0.906	K1	0.982	cation-chloride co-transporter 1	cation-chloride co-transporter 1 (CCC1); FUNCTIONS IN: sodium:potassium:chloride symporter activity, cation:chloride symporter activity; INVOLVED IN: transport, chloride transport, cation transport, sodium ion transport, transmembrane transport; LOCATED IN: plasma membrane; EXPRESSED IN: root vascular system, root tip, cultured cell; CONTAINS InterPro DOMAIN/s: Amino acid permease domain (InterPr…	Amino acid permease/ SLC12A domain | Na/K/Cl co-transporter superfamily	NO
AT1G30520	11	1:10811561-10811565	+	AA	0.12356	0.021516	0.10205	0.984	K1	0.5525	acyl-activating enzyme 14	acyl-activating enzyme 14 (AAE14); CONTAINS InterPro DOMAIN/s: AMP-binding, conserved site (InterPro:IPR020845), AMP-dependent synthetase/ligase (InterPro:IPR000873); BEST Arabidopsis thaliana protein match is: AMP-dependent synthetase and ligase family protein (TAIR:AT4G19010.1)	AMP-binding enzyme C-terminal domain | AMP-binding, conserved site | AMP-dependent synthetase/ligase	NO
AT1G30520	14	1:10811871-10811917	+	AD	0.8837	0.99121	-0.10751	1	K2	1.4393	acyl-activating enzyme 14	acyl-activating enzyme 14 (AAE14); CONTAINS InterPro DOMAIN/s: AMP-binding, conserved site (InterPro:IPR020845), AMP-dependent synthetase/ligase (InterPro:IPR000873); BEST Arabidopsis thaliana protein match is: AMP-dependent synthetase and ligase family protein (TAIR:AT4G19010.1)	AMP-binding enzyme C-terminal domain | AMP-binding, conserved site | AMP-dependent synthetase/ligase	NO
AT1G30520	15	1:10811918-10811924	+	AD	0.49966	0.63024	-0.13059	0.906	K2	1.7356	acyl-activating enzyme 14	acyl-activating enzyme 14 (AAE14); CONTAINS InterPro DOMAIN/s: AMP-binding, conserved site (InterPro:IPR020845), AMP-dependent synthetase/ligase (InterPro:IPR000873); BEST Arabidopsis thaliana protein match is: AMP-dependent synthetase and ligase family protein (TAIR:AT4G19010.1)	AMP-binding enzyme C-terminal domain | AMP-binding, conserved site | AMP-dependent synthetase/ligase	NO
AT1G30540	14	1:10817492-10817672	-	RI	0.084833	0.20536	-0.12052	0.967	K1	0.8326	Actin-like ATPase superfamily protein	Actin-like ATPase superfamily protein; CONTAINS InterPro DOMAIN/s: ATPase, BadF/BadG/BcrA/BcrD type (InterPro:IPR002731)	ATPase, BadF/BadG/BcrA/BcrD type	NO
AT1G30545	5	1:10821523-10821594	-	RI	0.10578	0.30881	-0.20303	0.905	K2	1.54	S-adenosyl-L-methionine-dependent methyltransferase superfamily protein;(source:Araport11)			NO
AT1G30590	23	1:10838784-10838876	-	RI	0.56005	0.69856	-0.13851	0.989	K2	1.094	RNA polymerase I specific transcription initiation factor RRN3 protein	RNA polymerase I specific transcription initiation factor RRN3 protein; CONTAINS InterPro DOMAIN/s: RNA polymerase I specific transcription initiation factor RRN3 (InterPro:IPR007991); BEST Arabidopsis thaliana protein match is: RNA polymerase I specific transcription initiation factor RRN3 protein (TAIR:AT2G34750.1)	RNA polymerase I specific transcription initiation factor RRN3	NO
AT1G30970	18	1:11040685-11041203	-	RI	0.50171	0.74348	-0.24177	0.999	K1	0.9998	zinc finger (C2H2 type) family protein	suppressor of FRIGIDA4 (SUF4); CONTAINS InterPro DOMAIN/s: Zinc finger, C2H2-like (InterPro:IPR015880), Zinc finger, BED-type predicted (InterPro:IPR003656), Zinc finger, C2H2-type (InterPro:IPR007087); FUNCTIONS IN: DNA binding, protein homodimerization activity, protein heterodimerization activity, sequence-specific DNA binding transcription factor activity; INVOLVED IN: histone H3-K4 methylati…	Zinc finger, BED-type | Zinc finger, C2H2 | Zinc finger, C2H2-like	NO
AT1G31360	26	1:11236406-11236470	+	CE	0.77043	0.93319	-0.16276	0.949	K3	1.9054	RECQ helicase L2	RECQ helicase L2 (RECQL2); CONTAINS InterPro DOMAIN/s: DNA/RNA helicase, DEAD/DEAH box type, N-terminal (InterPro:IPR011545), RQC domain (InterPro:IPR018982), DNA helicase, ATP-dependent, RecQ type (InterPro:IPR004589), DNA helicase, ATP-dependent, RecQ type, N-terminal (InterPro:IPR018329), DEAD-like helicase, N-terminal (InterPro:IPR014001), DNA/RNA helicase, C-terminal (InterPro:IPR001650), He…		NO
AT1G31410	8	1:11248343-11248356	-	AA	0.7079	0.58607	0.12183	0.929	K1	0.9935	putrescine-binding periplasmic protein-related	putrescine-binding periplasmic protein-related; FUNCTIONS IN: transporter activity; INVOLVED IN: transport; LOCATED IN: chloroplast; EXPRESSED IN: 20 plant structures; EXPRESSED DURING: 13 growth stages; CONTAINS InterPro DOMAIN/s: Bacterial periplasmic spermidine/putrescine-binding protein (InterPro:IPR001188), Bacterial extracellular solute-binding, family 1 (InterPro:IPR006059)	Bacterial periplasmic spermidine/putrescine-binding protein	NO
AT1G31800	15	1:11397382-11397469	+	RI	0.15095	0.03512	0.11583	1	K1	0.6386	cytochrome P450, family 97, subfamily A, polypeptide 3	cytochrome P450, family 97, subfamily A, polypeptide 3 (CYP97A3); FUNCTIONS IN: carotene beta-ring hydroxylase activity, oxygen binding; INVOLVED IN: carotenoid biosynthetic process, xanthophyll biosynthetic process; LOCATED IN: chloroplast; EXPRESSED IN: 22 plant structures; EXPRESSED DURING: 13 growth stages; CONTAINS InterPro DOMAIN/s: Cytochrome P450 (InterPro:IPR001128), Cytochrome P450, E-c…	Cytochrome P450 | Cytochrome P450, E-class, group I | Cytochrome P450, conserved site	NO
AT1G31870	6	1:11438674-11438773	+	AA	0.60419	0.12186	0.48232	1	K1	0.9836		unknown protein; FUNCTIONS IN: molecular_function unknown; INVOLVED IN: biological_process unknown; LOCATED IN: cytosol, nucleus; EXPRESSED IN: 25 plant structures; EXPRESSED DURING: 15 growth stages; CONTAINS InterPro DOMAIN/s: Protein of unknown function DUF2050, pre-mRNA-splicing factor (InterPro:IPR018609)	Bud13	NO
AT1G32120	6	1:11554961-11555040	+	RI	0.48474	0.78261	-0.29787	0.985	K1	0.9996		FUNCTIONS IN: molecular_function unknown; INVOLVED IN: biological_process unknown; LOCATED IN: membrane; EXPRESSED IN: 14 plant structures; EXPRESSED DURING: 4 anthesis, C globular stage, F mature embryo stage, petal differentiation and expansion stage, E expanded cotyledon stage; CONTAINS InterPro DOMAIN/s: Aminotransferase-like, plant mobile domain (InterPro:IPR019557), Protein of unknown funct…	Aminotransferase-like, plant mobile domain | Protein of unknown function DUF716 (TMEM45)	NO
AT1G32200	26	1:11602115-11602208	-	RI	0.45566	0.16722	0.28844	1	K1	0.9999	phospholipid/glycerol acyltransferase family protein	ATS1; FUNCTIONS IN: glycerol-3-phosphate O-acyltransferase activity; INVOLVED IN: phosphatidylglycerol biosynthetic process; LOCATED IN: chloroplast stroma, chloroplast, plastid; EXPRESSED IN: 22 plant structures; EXPRESSED DURING: 14 growth stages; CONTAINS InterPro DOMAIN/s: Phospholipid/glycerol acyltransferase (InterPro:IPR002123), Glycerol-3-phosphate O-acyltransferase (InterPro:IPR016222)	Glycerol-3-phosphate O-acyltransferase, alpha helical bundle, N-terminal | Glycerol-3-phosphate O-acyltransferase, chloroplast | Phospholipid/glycerol acyltransferase	NO
AT1G32370	10	1:11678024-11678057	+	AA	0.6385	0.776	-0.1375	0.981	K3	1.9727	tobamovirus multiplication 2B	tobamovirus multiplication 2B (TOM2B); FUNCTIONS IN: molecular_function unknown; INVOLVED IN: viral replication complex formation and maintenance; EXPRESSED IN: 23 plant structures; EXPRESSED DURING: 14 growth stages		NO
AT1G32370	12	1:11677926-11678023	+	RI	0.46934	0.57612	-0.10679	0.94	K3	1.9659	tobamovirus multiplication 2B	tobamovirus multiplication 2B (TOM2B); FUNCTIONS IN: molecular_function unknown; INVOLVED IN: viral replication complex formation and maintenance; EXPRESSED IN: 23 plant structures; EXPRESSED DURING: 14 growth stages		NO
AT1G33265	3	1:12066990-12067054	+	CE	0.68493	0.90007	-0.21513	0.983	K2	1.301	Transmembrane proteins 14C	Transmembrane proteins 14C; INVOLVED IN: biological_process unknown; LOCATED IN: chloroplast, membrane; EXPRESSED IN: 21 plant structures; EXPRESSED DURING: 12 growth stages; CONTAINS InterPro DOMAIN/s: Uncharacterised protein family UPF0136, Transmembrane (InterPro:IPR005349)	Uncharacterised protein family UPF0136, Transmembrane	NO
AT1G33290	7	1:12074659-12074663	+	AA	0.25906	0.1485	0.11056	0.957	K1	0.9047	P-loop containing nucleoside triphosphate hydrolases superfamily protein	P-loop containing nucleoside triphosphate hydrolases superfamily protein; BEST Arabidopsis thaliana protein match is: P-loop containing nucleoside triphosphate hydrolases superfamily protein (TAIR:AT1G73170.1); FUNCTIONS IN: nucleoside-triphosphatase activity, nucleotide binding, ATP binding; EXPRESSED IN: 23 plant structures; EXPRESSED DURING: 15 growth stages; CONTAINS InterPro DOMAIN/s: ATPase…	AAA+ ATPase domain | ATPase, AAA-type, core | P-loop containing nucleoside triphosphate hydrolase	NO
AT1G33340	5	1:12088109-12088218	+	EI/RI	0.98162	0.77463	0.20699	1	K1	0.795	ENTH/ANTH/VHS superfamily protein	ENTH/ANTH/VHS superfamily protein; FUNCTIONS IN: phospholipid binding, clathrin binding, binding, phosphatidylinositol binding; INVOLVED IN: clathrin coat assembly; LOCATED IN: clathrin coat; EXPRESSED IN: 11 plant structures; EXPRESSED DURING: 9 growth stages; CONTAINS InterPro DOMAIN/s: Epsin-like, N-terminal (InterPro:IPR013809), ANTH (InterPro:IPR011417), ENTH/VHS (InterPro:IPR008942), Clathr…	AP180 N-terminal homology (ANTH) domain | Clathrin adaptor, phosphoinositide-binding, GAT-like | ENTH/VHS | Epsin-like, N-terminal	NO
AT1G33340	5	1:12088109-12088218	+	RI	0.98162	0.77463	0.20699	1	K1	0.795	ENTH/ANTH/VHS superfamily protein	ENTH/ANTH/VHS superfamily protein; FUNCTIONS IN: phospholipid binding, clathrin binding, binding, phosphatidylinositol binding; INVOLVED IN: clathrin coat assembly; LOCATED IN: clathrin coat; EXPRESSED IN: 11 plant structures; EXPRESSED DURING: 9 growth stages; CONTAINS InterPro DOMAIN/s: Epsin-like, N-terminal (InterPro:IPR013809), ANTH (InterPro:IPR011417), ENTH/VHS (InterPro:IPR008942), Clathr…	AP180 N-terminal homology (ANTH) domain | Clathrin adaptor, phosphoinositide-binding, GAT-like | ENTH/VHS | Epsin-like, N-terminal	NO
AT1G33475	3	1:12147722-12148027	-	EI/RI	0.96377	0.74811	0.21566	0.994	K1	0.9262	SNARE-like superfamily protein	SNARE-like superfamily protein; INVOLVED IN: transport; EXPRESSED IN: inflorescence meristem, sepal, male gametophyte, petiole, carpel; EXPRESSED DURING: 4 anthesis; CONTAINS InterPro DOMAIN/s: Longin-like (InterPro:IPR011012); BEST Arabidopsis thaliana protein match is: SNARE-like superfamily protein (TAIR:AT4G10170.2)	Longin domain | Longin-like domain	NO
AT1G33475	3	1:12147722-12148027	-	RI	0.96377	0.74811	0.21566	0.994	K1	0.9262	SNARE-like superfamily protein	SNARE-like superfamily protein; INVOLVED IN: transport; EXPRESSED IN: inflorescence meristem, sepal, male gametophyte, petiole, carpel; EXPRESSED DURING: 4 anthesis; CONTAINS InterPro DOMAIN/s: Longin-like (InterPro:IPR011012); BEST Arabidopsis thaliana protein match is: SNARE-like superfamily protein (TAIR:AT4G10170.2)	Longin domain | Longin-like domain	NO
AT1G33615	8	1:12194173-12194261	-	CE	0.39086	0.96225	-0.57139	0.987	K2	1.5034	other RNA			NO
AT1G33615	12	1:12194101-12194172	-	RI	0.75931	0.24713	0.51218	1	K3	2.3976	other RNA			NO
AT1G33615	10	1:12194262-12194350	-	RI	0.73752	0.16405	0.57346	1	K3	2.3976	other RNA			NO
AT1G34160	6	1:12442078-12442236	+	RI	0.94745	0.77099	0.17646	0.904	K1	0.8631	Tetratricopeptide repeat (TPR)-like superfamily protein	Tetratricopeptide repeat (TPR)-like superfamily protein; CONTAINS InterPro DOMAIN/s: Pentatricopeptide repeat (InterPro:IPR002885); BEST Arabidopsis thaliana protein match is: Tetratricopeptide repeat (TPR)-like superfamily protein (TAIR:AT4G21065.1)	Pentatricopeptide repeat	NO
AT1G34210	6	1:12458936-12459043	+	RI	0.59725	0.91771	-0.32046	0.973	K2	1.1243	somatic embryogenesis receptor-like kinase 2	somatic embryogenesis receptor-like kinase 2 (SERK2); FUNCTIONS IN: kinase activity; INVOLVED IN: pollen maturation, microsporogenesis; LOCATED IN: plasma membrane; EXPRESSED IN: 23 plant structures; EXPRESSED DURING: 14 growth stages; CONTAINS InterPro DOMAIN/s: Protein kinase, ATP binding site (InterPro:IPR017441), Protein kinase, catalytic domain (InterPro:IPR000719), Leucine-rich repeat-conta…	Concanavalin A-like lectin/glucanase, subgroup | Leucine-rich repeat | Leucine-rich repeat-containing N-terminal, type 2 | Protein kinase domain | Protein kinase, ATP binding site | Protein kinase-like domain | Serine-threonine/tyrosine-protein kinase catalytic domain | Serine/threonine-protein kinase, active site	NO
AT1G34340	20	1:12532662-12532696	+	AD	0.19108	0.063215	0.12787	0.991	K2	1.2751	alpha/beta-Hydrolases superfamily protein	alpha/beta-Hydrolases superfamily protein; CONTAINS InterPro DOMAIN/s: Alpha/beta hydrolase fold-1 (InterPro:IPR000073); BEST Arabidopsis thaliana protein match is: alpha/beta-Hydrolases superfamily protein (TAIR:AT5G49950.1)	Alpha/Beta hydrolase fold	NO
AT1G34340	13	1:12531674-12531747	+	RI	0.43488	0.28997	0.14491	0.952	K6	3.5497	alpha/beta-Hydrolases superfamily protein	alpha/beta-Hydrolases superfamily protein; CONTAINS InterPro DOMAIN/s: Alpha/beta hydrolase fold-1 (InterPro:IPR000073); BEST Arabidopsis thaliana protein match is: alpha/beta-Hydrolases superfamily protein (TAIR:AT5G49950.1)	Alpha/Beta hydrolase fold	NO
AT1G34844	6	1:12752281-12752366	+	RI	0.39172	0.18628	0.20544	0.941	K1	0.9852	other RNA			NO
AT1G35180	4	1:12877579-12877674	-	CE	0.85993	0.97579	-0.11586	0.978	K1	0.7112	TRAM, LAG1 and CLN8 (TLC) lipid-sensing domain containing protein	TRAM, LAG1 and CLN8 (TLC) lipid-sensing domain containing protein; FUNCTIONS IN: molecular_function unknown; INVOLVED IN: biological_process unknown; LOCATED IN: integral to membrane; CONTAINS InterPro DOMAIN/s: TRAM/LAG1/CLN8 homology domain (InterPro:IPR006634); BEST Arabidopsis thaliana protein match is: TRAM, LAG1 and CLN8 (TLC) lipid-sensing domain containing protein (TAIR:AT1G35170.1)	TRAM/LAG1/CLN8 homology domain	NO
AT1G35510	14	1:13073122-13073207	+	RI	0.17359	0.27521	-0.10163	0.934	K3	1.7203	O-fucosyltransferase family protein	O-fucosyltransferase family protein; FUNCTIONS IN: molecular_function unknown; INVOLVED IN: biological_process unknown; LOCATED IN: chloroplast; EXPRESSED IN: 22 plant structures; EXPRESSED DURING: 13 growth stages; CONTAINS InterPro DOMAIN/s: GDP-fucose protein O-fucosyltransferase (InterPro:IPR019378); BEST Arabidopsis thaliana protein match is: O-fucosyltransferase family protein (TAIR:AT2G014…	GDP-fucose protein O-fucosyltransferase | O-fucosyltransferase, plant	NO
AT1G35516	3	1:13078930-13079304	+	RI	0.38694	0.61621	-0.22928	1	K2	1.5846	myb-like transcription factor family protein	myb-like transcription factor family protein; CONTAINS InterPro DOMAIN/s: Myb transcription factor (InterPro:IPR015495)		NO
AT1G35612	3	1:13145882-13145980	+	RI	0.57896	0.78239	-0.20343	0.991	K1	0.9921	transposable element gene	expressed protein		NO
AT1G36070	14	1:13469098-13469138	-	CE	0.46287	0.61894	-0.15607	0.912	K3	2.1798	Transducin/WD40 repeat-like superfamily protein	Transducin/WD40 repeat-like superfamily protein; FUNCTIONS IN: molecular_function unknown; INVOLVED IN: biological_process unknown; LOCATED IN: CUL4 RING ubiquitin ligase complex, heterotrimeric G-protein complex; EXPRESSED IN: 22 plant structures; EXPRESSED DURING: 13 growth stages; CONTAINS InterPro DOMAIN/s: WD40 repeat 2 (InterPro:IPR019782), WD40 repeat-like-containing domain (InterPro:IPR01…	WD40 repeat | WD40 repeat, conserved site | WD40-repeat-containing domain | WD40/YVTN repeat-like-containing domain	NO
AT1G42540	7	1:15975183-15975184	+	AD	0.69702	0.42679	0.27023	0.919	K1	0.982	glutamate receptor 3.3	glutamate receptor 3.3 (GLR3.3); FUNCTIONS IN: intracellular ligand-gated ion channel activity; INVOLVED IN: cellular calcium ion homeostasis, response to light stimulus; LOCATED IN: integral to membrane, membrane; EXPRESSED IN: 22 plant structures; EXPRESSED DURING: 11 growth stages; CONTAINS InterPro DOMAIN/s: Extracellular solute-binding protein, family 3 (InterPro:IPR001638), Ionotropic gluta…	Extracellular ligand-binding receptor | Extracellular solute-binding protein, family 3 | Ionotropic glutamate receptor | Ionotropic glutamate receptor, plant | Periplasmic binding protein-like I	NO
AT1G43675	3	1:16470814-16470919	+	RI	0.17262	0.40088	-0.22826	0.961	K2	1.5791	transposable element gene	expressed protein		NO
AT1G43675	6	1:16471048-16471412	+	RI	0.085808	0.20973	-0.12392	0.957	K1	0.8302	transposable element gene	expressed protein		NO
AT1G43886	3	1:16640314-16642917	-	CE	0.93951	0.75281	0.1867	0.977	K3	2.0668	transposable element gene	copia-like retrotransposon family, has a 5.3e-165 P-value blast match to GB:AAA57005 Hopscotch polyprotein (Ty1_Copia-element) (Zea mays)		NO
AT1G43886	2	1:16642918-16643237	-	RI	0.79411	0.55534	0.23877	0.954	K3	2.0668	transposable element gene	copia-like retrotransposon family, has a 5.3e-165 P-value blast match to GB:AAA57005 Hopscotch polyprotein (Ty1_Copia-element) (Zea mays)		NO
AT1G44120	2	1:16782869-16783003	+	RI	0.29497	0.095929	0.19904	0.903	K1	0.9911	Armadillo/beta-catenin-like repeat ; C2 calcium/lipid-binding domain (CaLB) protein	Armadillo/beta-catenin-like repeat ; C2 calcium/lipid-binding domain (CaLB) protein; FUNCTIONS IN: binding; INVOLVED IN: biological_process unknown; LOCATED IN: cellular_component unknown; EXPRESSED IN: 8 plant structures; EXPRESSED DURING: L mature pollen stage, M germinated pollen stage, 4 anthesis, petal differentiation and expansion stage; CONTAINS InterPro DOMAIN/s: Armadillo-like helical (I…	Armadillo | Armadillo-like helical | Armadillo-type fold | C2 domain	NO
AT1G45248	5	1:17164123-17164196	-	AD	0.21943	0.085289	0.13414	0.936	K1	0.799	Nucleolar histone methyltransferase-related protein	Nucleolar histone methyltransferase-related protein; FUNCTIONS IN: molecular_function unknown; INVOLVED IN: biological_process unknown; LOCATED IN: cellular_component unknown; CONTAINS InterPro DOMAIN/s: WIYLD domain (InterPro:IPR018848); BEST Arabidopsis thaliana protein match is: Nucleolar histone methyltransferase-related protein (TAIR:AT2G40020.2)	WIYLD domain	NO
AT1G45248	10	1:17163346-17163399	-	CE	0.28265	0.83389	-0.55124	1	K2	1.7955	Nucleolar histone methyltransferase-related protein	Nucleolar histone methyltransferase-related protein; FUNCTIONS IN: molecular_function unknown; INVOLVED IN: biological_process unknown; LOCATED IN: cellular_component unknown; CONTAINS InterPro DOMAIN/s: WIYLD domain (InterPro:IPR018848); BEST Arabidopsis thaliana protein match is: Nucleolar histone methyltransferase-related protein (TAIR:AT2G40020.2)	WIYLD domain	NO
AT1G45248	11	1:17163421-17163534	-	RI	0.09315	0.36847	-0.27532	0.998	K3	2.3749	Nucleolar histone methyltransferase-related protein	Nucleolar histone methyltransferase-related protein; FUNCTIONS IN: molecular_function unknown; INVOLVED IN: biological_process unknown; LOCATED IN: cellular_component unknown; CONTAINS InterPro DOMAIN/s: WIYLD domain (InterPro:IPR018848); BEST Arabidopsis thaliana protein match is: Nucleolar histone methyltransferase-related protein (TAIR:AT2G40020.2)	WIYLD domain	NO
AT1G46768	6	1:17265962-17266005	-	CE	0.35916	0.70825	-0.34909	1	K3	1.5886	related to AP2 1	related to AP2 1 (RAP2.1); CONTAINS InterPro DOMAIN/s: DNA-binding, integrase-type (InterPro:IPR016177), Pathogenesis-related transcriptional factor/ERF, DNA-binding (InterPro:IPR001471); BEST Arabidopsis thaliana protein match is: related to AP2 10 (TAIR:AT4G36900.1)	AP2/ERF domain | DNA-binding domain	NO
AT1G46768	7	1:17265880-17265961	-	RI	0.35342	0.53426	-0.18084	0.98	K3	1.5761	related to AP2 1	related to AP2 1 (RAP2.1); CONTAINS InterPro DOMAIN/s: DNA-binding, integrase-type (InterPro:IPR016177), Pathogenesis-related transcriptional factor/ERF, DNA-binding (InterPro:IPR001471); BEST Arabidopsis thaliana protein match is: related to AP2 10 (TAIR:AT4G36900.1)	AP2/ERF domain | DNA-binding domain	NO
AT1G46768	4	1:17266009-17266093	-	RI	0.35455	0.69258	-0.33803	1	K3	1.5761	related to AP2 1	related to AP2 1 (RAP2.1); CONTAINS InterPro DOMAIN/s: DNA-binding, integrase-type (InterPro:IPR016177), Pathogenesis-related transcriptional factor/ERF, DNA-binding (InterPro:IPR001471); BEST Arabidopsis thaliana protein match is: related to AP2 10 (TAIR:AT4G36900.1)	AP2/ERF domain | DNA-binding domain	NO
AT1G47270	6	1:17327158-17327160	+	AA	0.44054	0.1362	0.30434	0.967	K2	1	tubby like protein 6	tubby like protein 6 (TLP6); FUNCTIONS IN: phosphoric diester hydrolase activity, sequence-specific DNA binding transcription factor activity; INVOLVED IN: regulation of transcription; LOCATED IN: cellular_component unknown; EXPRESSED IN: 24 plant structures; EXPRESSED DURING: 15 growth stages; CONTAINS InterPro DOMAIN/s: F-box domain, cyclin-like (InterPro:IPR001810), F-box domain, Skp2-like (In…	F-box domain | Tubby C-terminal-like domain | Tubby, C-terminal | Tubby, C-terminal, conserved site	NO
AT1G48030	18	1:17717321-17717420	-	RI	0.32428	0.19797	0.12631	0.978	K2	1.6066	mitochondrial lipoamide dehydrogenase 1	lipoamide dehydrogenase 1 (LPD1); mitochondrial lipoamide dehydrogenase 1 (mtLPD1); FUNCTIONS IN: dihydrolipoyl dehydrogenase activity, copper ion binding, cobalt ion binding, zinc ion binding, ATP binding; INVOLVED IN: response to cadmium ion, response to light stimulus; LOCATED IN: mitochondrion, apoplast, mitochondrial respiratory chain complex I, mitochondrial matrix; EXPRESSED IN: 28 plant s…	Dihydrolipoamide dehydrogenase | FAD-dependent pyridine nucleotide-disulphide oxidoreductase | FAD/NAD-linked reductase, dimerisation domain | Pyridine nucleotide-disulphide oxidoreductase, FAD/NAD(P)-binding domain | Pyridine nucleotide-disulphide oxidoreductase, NAD-binding domain | Pyridine nucleotide-disulphide oxidoreductase, class I, active site | Pyridine nucleotide-disulphide oxidoreducta…	NO
AT1G48050	11	1:17724381-17724454	+	RI	0.34608	0.072231	0.27385	1	K1	0.9683	Ku80 family protein	KU80; FUNCTIONS IN: double-stranded DNA binding, protein binding; INVOLVED IN: in 6 processes; LOCATED IN: nucleus; EXPRESSED IN: 22 plant structures; EXPRESSED DURING: 13 growth stages; CONTAINS InterPro DOMAIN/s: Ku70/Ku80, N-terminal alpha/beta (InterPro:IPR005161), DNA helicase, ATP-dependent, Ku type (InterPro:IPR006164), Spen Paralogue and Orthologue SPOC, C-terminal-like (InterPro:IPR01619…	Ku, C-terminal | Ku70/Ku80 C-terminal arm | Ku70/Ku80 beta-barrel domain | Ku70/Ku80, N-terminal alpha/beta | Ku80 | SPOC like C-terminal domain | von Willebrand factor, type A	NO
AT1G48210	8	1:17799518-17799520	+	AA	0.81319	0.92296	-0.10977	0.927	K2	1.0878	Protein kinase superfamily protein	Protein kinase superfamily protein; FUNCTIONS IN: protein serine/threonine kinase activity, protein kinase activity, kinase activity, ATP binding; INVOLVED IN: protein amino acid phosphorylation; LOCATED IN: plasma membrane; EXPRESSED IN: 23 plant structures; EXPRESSED DURING: 13 growth stages; CONTAINS InterPro DOMAIN/s: Protein kinase, ATP binding site (InterPro:IPR017441), Protein kinase, cata…	Protein kinase domain | Protein kinase, ATP binding site | Protein kinase-like domain | Serine-threonine/tyrosine-protein kinase catalytic domain | Serine/threonine-protein kinase, active site	NO
AT1G48360	18	1:17871160-17871247	+	CE	0.86378	0.96521	-0.10143	0.925	K1	0.6293	zinc ion binding;nucleic acid binding;hydrolases, acting on acid anhydrides, in phosphorus-containing anhydrides	zinc ion binding;nucleic acid binding;hydrolases, acting on acid anhydrides, in phosphorus-containing anhydrides; FUNCTIONS IN: hydrolase activity, acting on acid anhydrides, in phosphorus-containing anhydrides, zinc ion binding, nucleic acid binding; INVOLVED IN: biological_process unknown; LOCATED IN: mitochondrion; EXPRESSED IN: 24 plant structures; EXPRESSED DURING: 15 growth stages; CONTAINS…	HIRAN domain | VRR-NUC domain	NO
AT1G48430	33	1:17904916-17905065	-	RI	0.19717	0.35118	-0.15401	0.962	K3	1.4441	Dihydroxyacetone kinase	Dihydroxyacetone kinase; FUNCTIONS IN: glycerone kinase activity, ATP binding; INVOLVED IN: glycerol metabolic process; LOCATED IN: cellular_component unknown; EXPRESSED IN: 22 plant structures; EXPRESSED DURING: 13 growth stages; CONTAINS InterPro DOMAIN/s: Dak phosphatase (InterPro:IPR004007), Dihydroxyacetone kinase (InterPro:IPR012734), Dak kinase (InterPro:IPR004006); BEST Arabidopsis thalia…	Dak kinase | DhaL domain | Dihydroxyacetone kinase	NO
AT1G48490	3	1:17928634-17928718	-	RI	0.83276	0.51098	0.32178	0.964	K1	0.9881	Protein kinase superfamily protein	Protein kinase superfamily protein; FUNCTIONS IN: kinase activity; INVOLVED IN: protein amino acid phosphorylation; LOCATED IN: chloroplast; CONTAINS InterPro DOMAIN/s: Serine/threonine-protein kinase domain (InterPro:IPR002290), Serine/threonine-protein kinase-like domain (InterPro:IPR017442), Serine/threonine-protein kinase, active site (InterPro:IPR008271), AGC-kinase, C-terminal (InterPro:IPR…	AGC-kinase, C-terminal | Protein kinase domain | Protein kinase-like domain | Serine/threonine-protein kinase, active site | Serine/threonine/dual specificity protein kinase, catalytic domain	NO
AT1G48540	29	1:17950152-17950225	+	RI	0.27619	0.084883	0.19131	0.996	K2	1.0867	Outer arm dynein light chain 1 protein	Outer arm dynein light chain 1 protein; BEST Arabidopsis thaliana protein match is: Outer arm dynein light chain 1 protein (TAIR:AT3G17920.1)	Leucine-rich repeat	NO
AT1G49010	3	1:18133139-18133258	+	RI	0.35891	0.46694	-0.10802	0.985	K1	0.9998	Duplicated homeodomain-like superfamily protein	Duplicated homeodomain-like superfamily protein; CONTAINS InterPro DOMAIN/s: Molecular chaperone, heat shock protein, Hsp40, DnaJ (InterPro:IPR015609), SANT, eukarya (InterPro:IPR017884), Myb-like DNA-binding domain, SHAQKYF class (InterPro:IPR006447), SANT, DNA-binding (InterPro:IPR001005), Myb, DNA-binding (InterPro:IPR014778), Homeodomain-like (InterPro:IPR009057), HTH transcriptional regulato…	Homeodomain-like | Myb domain | Myb domain, plants | SANT domain | SANT/Myb domain	NO
AT1G49170	4	1:18183693-18184099	-	RI	0.046036	0.15176	-0.10572	0.966	K1	0.6501	Protein of unknown function (DUF167)	Protein of unknown function (DUF167); CONTAINS InterPro DOMAIN/s: Protein of unknown function DUF167 (InterPro:IPR003746); BEST Arabidopsis thaliana protein match is: Protein of unknown function (DUF167) (TAIR:AT5G63440.3)	Protein of unknown function DUF167	NO
AT1G49180	33	1:18184821-18184942	-	RI	0.38435	0.66168	-0.27733	0.997	K2	1.3314	protein kinase family protein	protein kinase family protein; FUNCTIONS IN: protein serine/threonine kinase activity, protein kinase activity, kinase activity, ATP binding, nucleic acid binding; FUNCTIONS IN: protein serine/threonine kinase activity, protein kinase activity, kinase activity, nucleic acid binding, ATP binding; INVOLVED IN: protein amino acid phosphorylation; LOCATED IN: cellular_component unknown; EXPRESSED IN:…	Protein kinase domain | Protein kinase-like domain | Ribonuclease H-like domain | Serine/threonine-protein kinase, active site | Serine/threonine/dual specificity protein kinase, catalytic domain	NO
AT1G49180	10	1:18186675-18186745	-	RI	0.27084	0.10235	0.16849	0.999	K4	1.4982	protein kinase family protein	protein kinase family protein; FUNCTIONS IN: protein serine/threonine kinase activity, protein kinase activity, kinase activity, ATP binding, nucleic acid binding; FUNCTIONS IN: protein serine/threonine kinase activity, protein kinase activity, kinase activity, nucleic acid binding, ATP binding; INVOLVED IN: protein amino acid phosphorylation; LOCATED IN: cellular_component unknown; EXPRESSED IN:…	Protein kinase domain | Protein kinase-like domain | Ribonuclease H-like domain | Serine/threonine-protein kinase, active site | Serine/threonine/dual specificity protein kinase, catalytic domain	NO
AT1G49300	5	1:18235564-18235731	+	RI	0.3338	0.077318	0.25649	1	K1	0.9324	RAB GTPase homolog G3E	RAB GTPase homolog G3E (RABG3E); FUNCTIONS IN: GTP binding; INVOLVED IN: response to oxidative stress, response to salt stress; LOCATED IN: plasma membrane; EXPRESSED IN: 25 plant structures; EXPRESSED DURING: 15 growth stages; CONTAINS InterPro DOMAIN/s: Ras GTPase (InterPro:IPR001806), Small GTP-binding protein (InterPro:IPR005225), Small GTPase (InterPro:IPR020851), Ras (InterPro:IPR013753), R…	P-loop containing nucleoside triphosphate hydrolase | Small GTP-binding protein domain | Small GTPase superfamily | Small GTPase superfamily, Rab type	NO
AT1G49340	9	1:18253849-18253869	+	AD	0.80335	0.51546	0.28789	0.983	K1	0.9957	Phosphatidylinositol 3- and 4-kinase family protein	ATPI4K ALPHA; FUNCTIONS IN: 1-phosphatidylinositol 4-kinase activity, inositol or phosphatidylinositol kinase activity; INVOLVED IN: protein amino acid phosphorylation; LOCATED IN: plasma membrane; EXPRESSED IN: shoot, male gametophyte, flower, pollen tube; EXPRESSED DURING: L mature pollen stage, M germinated pollen stage; CONTAINS InterPro DOMAIN/s: Phosphatidylinositol 3-/4-kinase, catalytic (…	Armadillo-type fold | Phosphatidylinositol 3-/4-kinase, catalytic domain | Phosphatidylinositol 3/4-kinase, conserved site | Phosphatidylinositol Kinase | Phosphoinositide 3-kinase, accessory (PIK) domain | Protein kinase-like domain	NO
AT1G49340	20	1:18257428-18257438	+	AD	0.97176	0.80637	0.16539	0.976	K1	0.795	Phosphatidylinositol 3- and 4-kinase family protein	ATPI4K ALPHA; FUNCTIONS IN: 1-phosphatidylinositol 4-kinase activity, inositol or phosphatidylinositol kinase activity; INVOLVED IN: protein amino acid phosphorylation; LOCATED IN: plasma membrane; EXPRESSED IN: shoot, male gametophyte, flower, pollen tube; EXPRESSED DURING: L mature pollen stage, M germinated pollen stage; CONTAINS InterPro DOMAIN/s: Phosphatidylinositol 3-/4-kinase, catalytic (…	Armadillo-type fold | Phosphatidylinositol 3-/4-kinase, catalytic domain | Phosphatidylinositol 3/4-kinase, conserved site | Phosphatidylinositol Kinase | Phosphoinositide 3-kinase, accessory (PIK) domain | Protein kinase-like domain	NO
AT1G49340	66	1:18264022-18264148	+	RI	0.87441	0.7513	0.12311	0.946	K1	0.8785	Phosphatidylinositol 3- and 4-kinase family protein	ATPI4K ALPHA; FUNCTIONS IN: 1-phosphatidylinositol 4-kinase activity, inositol or phosphatidylinositol kinase activity; INVOLVED IN: protein amino acid phosphorylation; LOCATED IN: plasma membrane; EXPRESSED IN: shoot, male gametophyte, flower, pollen tube; EXPRESSED DURING: L mature pollen stage, M germinated pollen stage; CONTAINS InterPro DOMAIN/s: Phosphatidylinositol 3-/4-kinase, catalytic (…	Armadillo-type fold | Phosphatidylinositol 3-/4-kinase, catalytic domain | Phosphatidylinositol 3/4-kinase, conserved site | Phosphatidylinositol Kinase | Phosphoinositide 3-kinase, accessory (PIK) domain | Protein kinase-like domain	NO
AT1G49500	6	1:18320677-18321414	-	RI	0.40183	0.80304	-0.40121	0.968	K2	1.4624		unknown protein; FUNCTIONS IN: molecular_function unknown; INVOLVED IN: biological_process unknown; LOCATED IN: endomembrane system; EXPRESSED IN: 19 plant structures; EXPRESSED DURING: 10 growth stages; BEST Arabidopsis thaliana protein match is: unknown protein (TAIR:AT3G19030.1)		NO
AT1G49590	9	1:18355747-18355796	+	CE	0.25082	0.54364	-0.29282	1	K3	2.0067	C2H2 and C2HC zinc fingers superfamily protein	C2H2 and C2HC zinc fingers superfamily protein; FUNCTIONS IN: zinc ion binding, nucleic acid binding; INVOLVED IN: biological_process unknown; LOCATED IN: nucleus; EXPRESSED IN: 23 plant structures; EXPRESSED DURING: 13 growth stages; CONTAINS InterPro DOMAIN/s: Zinc finger, U1-C type (InterPro:IPR013085), Zinc finger, C2H2-type matrin (InterPro:IPR000690); CONTAINS InterPro DOMAIN/s: Zinc finger…	Zinc finger, C2H2-type matrin | Zinc finger, U1-C type	NO
AT1G50140	19	1:18575740-18575747	-	AD	0.15314	0.27124	-0.11809	0.911	K2	1.5849	P-loop containing nucleoside triphosphate hydrolases superfamily protein	P-loop containing nucleoside triphosphate hydrolases superfamily protein; FUNCTIONS IN: nucleoside-triphosphatase activity, ATPase activity, nucleotide binding, ATP binding; INVOLVED IN: biological_process unknown; LOCATED IN: cellular_component unknown; EXPRESSED IN: 23 plant structures; EXPRESSED DURING: 15 growth stages; CONTAINS InterPro DOMAIN/s: ATPase, AAA-type, core (InterPro:IPR003959), …	AAA+ ATPase domain | ATPase, AAA-type, conserved site | ATPase, AAA-type, core | P-loop containing nucleoside triphosphate hydrolase	NO
AT1G50140	47	1:18571903-18571985	-	RI	0.067055	0.19968	-0.13263	0.971	K2	0.7794	P-loop containing nucleoside triphosphate hydrolases superfamily protein	P-loop containing nucleoside triphosphate hydrolases superfamily protein; FUNCTIONS IN: nucleoside-triphosphatase activity, ATPase activity, nucleotide binding, ATP binding; INVOLVED IN: biological_process unknown; LOCATED IN: cellular_component unknown; EXPRESSED IN: 23 plant structures; EXPRESSED DURING: 15 growth stages; CONTAINS InterPro DOMAIN/s: ATPase, AAA-type, core (InterPro:IPR003959), …	AAA+ ATPase domain | ATPase, AAA-type, conserved site | ATPase, AAA-type, core | P-loop containing nucleoside triphosphate hydrolase	NO
AT1G50260	9	1:18620071-18620089	-	CE	0.79902	0.95805	-0.15903	0.988	K3	2.1598	N-terminal-transmembrane-C2 domain type 5.1	N-terminal-transmembrane-C2 domain type 5.1 (NTMC2T5.1); FUNCTIONS IN: molecular_function unknown; INVOLVED IN: biological_process unknown; LOCATED IN: chloroplast; CONTAINS InterPro DOMAIN/s: Protein of unknown function DUF2404, transmembrane (InterPro:IPR019411), C2 membrane targeting protein (InterPro:IPR018029), C2 calcium/lipid-binding domain, CaLB (InterPro:IPR008973), C2 calcium-dependent …	C2 domain | Domain of unknown function DUF2404	NO
AT1G50260	12	1:18619758-18620070	-	RI	0.22031	0.061664	0.15865	0.989	K3	2.1619	N-terminal-transmembrane-C2 domain type 5.1	N-terminal-transmembrane-C2 domain type 5.1 (NTMC2T5.1); FUNCTIONS IN: molecular_function unknown; INVOLVED IN: biological_process unknown; LOCATED IN: chloroplast; CONTAINS InterPro DOMAIN/s: Protein of unknown function DUF2404, transmembrane (InterPro:IPR019411), C2 membrane targeting protein (InterPro:IPR018029), C2 calcium/lipid-binding domain, CaLB (InterPro:IPR008973), C2 calcium-dependent …	C2 domain | Domain of unknown function DUF2404	NO
AT1G50440	5	1:18685967-18686060	+	RI	0.32989	0.19427	0.13562	0.965	K3	1.8886	RING/FYVE/PHD zinc finger superfamily protein	RING/FYVE/PHD zinc finger superfamily protein; FUNCTIONS IN: zinc ion binding; EXPRESSED IN: 22 plant structures; EXPRESSED DURING: 13 growth stages; CONTAINS InterPro DOMAIN/s: Zinc finger, C3HC4 RING-type (InterPro:IPR018957), Zinc finger, RING-CH-type (InterPro:IPR011016); BEST Arabidopsis thaliana protein match is: RING/FYVE/PHD zinc finger superfamily protein (TAIR:AT1G11020.1)	Zinc finger, RING-CH-type | Zinc finger, RING/FYVE/PHD-type	NO
AT1G50460	26	1:18696719-18696854	+	RI	0.16887	0.32667	-0.15781	0.928	K1	0.9656	hexokinase-like 1	hexokinase-like 1 (HKL1); FUNCTIONS IN: hexokinase activity, ATP binding; INVOLVED IN: response to salt stress, response to cold, response to osmotic stress; LOCATED IN: mitochondrion, plastid; EXPRESSED IN: 26 plant structures; EXPRESSED DURING: 13 growth stages; CONTAINS InterPro DOMAIN/s: Hexokinase, N-terminal (InterPro:IPR022672), Hexokinase, C-terminal (InterPro:IPR022673), Hexokinase (Inte…	Hexokinase | Hexokinase, C-terminal | Hexokinase, N-terminal	NO
AT1G50500	34	1:18711274-18711707	-	RI	0.15871	0.053476	0.10523	0.95	K3	0.8638	Membrane trafficking VPS53 family protein	HEAT-INTOLERANT 1 (HIT1); CONTAINS InterPro DOMAIN/s: Vps53-like, N-terminal (InterPro:IPR007234); BEST Arabidopsis thaliana protein match is: Membrane trafficking VPS53 family protein (TAIR:AT1G50970.1)	Vps53-like, N-terminal	NO
AT1G50730	16	1:18796931-18796934	+	AA	0.29133	0.47457	-0.18324	0.904	K2	1.4587		unknown protein	UPF0505 family | UPF0505, invertebrates/plants	NO
AT1G50950	14	1:18882467-18882473	+	AD	0.83686	0.96225	-0.1254	0.9	K2	1.1887	Thioredoxin protein with domain of unknown function (DUF1692)	INVOLVED IN: cell redox homeostasis; EXPRESSED IN: 20 plant structures; EXPRESSED DURING: 11 growth stages; CONTAINS InterPro DOMAIN/s: Thioredoxin fold (InterPro:IPR012335), Thioredoxin-like (InterPro:IPR017936), Thioredoxin-like fold (InterPro:IPR012336), Thioredoxin domain (InterPro:IPR013766), Protein of unknown function DUF1692 (InterPro:IPR012936); BEST Arabidopsis thaliana protein match is…	Endoplasmic reticulum vesicle transporter, C-terminal | Thioredoxin domain | Thioredoxin-like fold	NO
AT1G51430	7	1:19068526-19068571	+	CE	0.26195	0.5287	-0.26675	1	K2	1.5715		unknown protein; BEST Arabidopsis thaliana protein match is: unknown protein (TAIR:AT3G28370.1)		NO
AT1G51430	6	1:19068490-19068523	+	RI	0.27178	0.53355	-0.26177	0.999	K4	2.1039		unknown protein; BEST Arabidopsis thaliana protein match is: unknown protein (TAIR:AT3G28370.1)		NO
AT1G51430	10	1:19068613-19068710	+	RI	0.21152	0.40112	-0.1896	0.998	K2	1.5715		unknown protein; BEST Arabidopsis thaliana protein match is: unknown protein (TAIR:AT3G28370.1)		NO
AT1G51520	12	1:19109180-19109209	+	CE	0.71758	0.93317	-0.21559	0.901	K2	1.5166	RNA-binding (RRM/RBD/RNP motifs) family protein	RNA-binding (RRM/RBD/RNP motifs) family protein; FUNCTIONS IN: nucleotide binding, nucleic acid binding; INVOLVED IN: biological_process unknown; LOCATED IN: cellular_component unknown; EXPRESSED IN: 9 plant structures; EXPRESSED DURING: 6 growth stages; CONTAINS InterPro DOMAIN/s: RNA recognition motif, RNP-1 (InterPro:IPR000504), Nucleotide-binding, alpha-beta plait (InterPro:IPR012677); BEST A…	Nucleotide-binding, alpha-beta plait | RNA recognition motif domain	NO
AT1G51720	18	1:19184117-19184129	+	AA	0.86529	0.7244	0.14088	0.991	K1	0.8611	Amino acid dehydrogenase family protein	Amino acid dehydrogenase family protein; FUNCTIONS IN: oxidoreductase activity, binding, catalytic activity; INVOLVED IN: oxidation reduction, metabolic process, cellular amino acid metabolic process; LOCATED IN: cellular_component unknown; EXPRESSED IN: 22 plant structures; EXPRESSED DURING: 13 growth stages; CONTAINS InterPro DOMAIN/s: Glutamate/phenylalanine/leucine/valine dehydrogenase (Inter…	Glutamate/phenylalanine/leucine/valine dehydrogenase | Glutamate/phenylalanine/leucine/valine dehydrogenase, C-terminal | Glutamate/phenylalanine/leucine/valine dehydrogenase, dimerisation domain | NAD(P)-binding domain	NO
AT1G51830	5	1:19245121-19245192	-	CE	0.83052	0.97989	-0.14937	0.955	K1	0.799	Leucine-rich repeat protein kinase family protein	Leucine-rich repeat protein kinase family protein; FUNCTIONS IN: protein serine/threonine kinase activity, kinase activity, ATP binding; INVOLVED IN: transmembrane receptor protein tyrosine kinase signaling pathway, protein amino acid phosphorylation; LOCATED IN: cellular_component unknown; EXPRESSED IN: root; CONTAINS InterPro DOMAIN/s: Protein kinase, ATP binding site (InterPro:IPR017441), Prot…	Concanavalin A-like lectin/glucanase, subgroup | Leucine-rich repeat | Malectin-like carbohydrate-binding domain | Protein kinase domain | Protein kinase, ATP binding site | Protein kinase-like domain | Serine/threonine-protein kinase, active site	NO
AT1G51830	7	1:19244956-19245016	-	CE	0.76213	0.98013	-0.218	0.991	K1	0.799	Leucine-rich repeat protein kinase family protein	Leucine-rich repeat protein kinase family protein; FUNCTIONS IN: protein serine/threonine kinase activity, kinase activity, ATP binding; INVOLVED IN: transmembrane receptor protein tyrosine kinase signaling pathway, protein amino acid phosphorylation; LOCATED IN: cellular_component unknown; EXPRESSED IN: root; CONTAINS InterPro DOMAIN/s: Protein kinase, ATP binding site (InterPro:IPR017441), Prot…	Concanavalin A-like lectin/glucanase, subgroup | Leucine-rich repeat | Malectin-like carbohydrate-binding domain | Protein kinase domain | Protein kinase, ATP binding site | Protein kinase-like domain | Serine/threonine-protein kinase, active site	NO
AT1G52100	5	1:19385233-19385428	-	AD	0.28467	0.097274	0.1874	1	K2	1.1744	Mannose-binding lectin superfamily protein	Mannose-binding lectin superfamily protein; FUNCTIONS IN: molecular_function unknown; INVOLVED IN: biological_process unknown; EXPRESSED IN: shoot, hypocotyl; LOCATED IN: membrane; CONTAINS InterPro DOMAIN/s: Mannose-binding lectin (InterPro:IPR001229); EXPRESSED IN: shoot, cotyledon, hypocotyl, leaf; BEST Arabidopsis thaliana protein match is: Mannose-binding lectin superfamily protein (TAIR:AT5…	Mannose-binding lectin	NO
AT1G52100	4	1:19385429-19385479	-	AD	0.28987	0.10434	0.18554	1	K2	1.1744	Mannose-binding lectin superfamily protein	Mannose-binding lectin superfamily protein; FUNCTIONS IN: molecular_function unknown; INVOLVED IN: biological_process unknown; EXPRESSED IN: shoot, hypocotyl; LOCATED IN: membrane; CONTAINS InterPro DOMAIN/s: Mannose-binding lectin (InterPro:IPR001229); EXPRESSED IN: shoot, cotyledon, hypocotyl, leaf; BEST Arabidopsis thaliana protein match is: Mannose-binding lectin superfamily protein (TAIR:AT5…	Mannose-binding lectin	NO
AT1G52500	7	1:19560978-19561046	+	CE	0.58553	0.9637	-0.37816	1	K3	0.9997	MUTM homolog-1	MMH-2; MUTM homolog-1 (MMH-1); CONTAINS InterPro DOMAIN/s: Ribosomal protein S13-like, H2TH (InterPro:IPR010979), DNA glycosylase/AP lyase, H2TH DNA-binding (InterPro:IPR015886), DNA glycosylase/AP lyase, catalytic domain (InterPro:IPR012319), DNA glycosylase/AP lyase (InterPro:IPR000191)	DNA glycosylase/AP lyase | DNA glycosylase/AP lyase, H2TH DNA-binding | DNA glycosylase/AP lyase, catalytic domain | Ribosomal protein S13-like, H2TH	NO
AT1G52510	15	1:19561894-19562051	-	AD	0.15894	0.42642	-0.26748	0.966	K2	1.2863	alpha/beta-Hydrolases superfamily protein	alpha/beta-Hydrolases superfamily protein; FUNCTIONS IN: hydrolase activity, catalytic activity; LOCATED IN: chloroplast; LOCATED IN: chloroplast, chloroplast envelope; EXPRESSED IN: 21 plant structures; EXPRESSED DURING: 13 growth stages; CONTAINS InterPro DOMAIN/s: Epoxide hydrolase-like (InterPro:IPR000639), Alpha/beta hydrolase fold-1 (InterPro:IPR000073); BEST Arabidopsis thaliana protein ma…	Alpha/Beta hydrolase fold | Alpha/beta hydrolase fold-1 | Epoxide hydrolase-like	NO
AT1G52565	3	1:19580303-19580363	-	RI	0.46575	0.31291	0.15284	0.96	K1	0.9951		unknown protein; FUNCTIONS IN: molecular_function unknown; INVOLVED IN: biological_process unknown; LOCATED IN: endomembrane system; BEST Arabidopsis thaliana protein match is: unknown protein (TAIR:AT3G15760.1)		NO
AT1G53090	5	1:19783571-19783683	+	RI	0.36783	0.63516	-0.26733	0.992	K2	1.5549	SPA1-related 4	SPA1-related 4 (SPA4); FUNCTIONS IN: protein binding, signal transducer activity; INVOLVED IN: protein amino acid phosphorylation; LOCATED IN: CUL4 RING ubiquitin ligase complex, heterotrimeric G-protein complex; EXPRESSED IN: 19 plant structures; EXPRESSED DURING: 11 growth stages; CONTAINS InterPro DOMAIN/s: WD40 repeat 2 (InterPro:IPR019782), WD40 repeat, conserved site (InterPro:IPR019775), W…	G-protein beta WD-40 repeat | Protein kinase domain | Protein kinase-like domain | WD40 repeat | WD40 repeat, conserved site | WD40-repeat-containing domain | WD40/YVTN repeat-like-containing domain	NO
AT1G53233	3	1:19850202-19850220	+	AA	0.84111	0.96431	-0.1232	0.92	K1	0.8213	other RNA			NO
AT1G53390	28	1:19922721-19922833	+	RI	0.051388	0.17385	-0.12246	0.93	K1	0.8183	P-loop containing nucleoside triphosphate hydrolases superfamily protein	P-loop containing nucleoside triphosphate hydrolases superfamily protein; FUNCTIONS IN: ATPase activity, coupled to transmembrane movement of substances; LOCATED IN: plasma membrane; EXPRESSED IN: 23 plant structures; EXPRESSED DURING: 13 growth stages; CONTAINS InterPro DOMAIN/s: ATPase, AAA+ type, core (InterPro:IPR003593), ABC transporter-like (InterPro:IPR003439), ABC transporter, conserved s…	AAA+ ATPase domain | ABC transporter, conserved site | ABC transporter-like | ABC-2 type transporter | P-loop containing nucleoside triphosphate hydrolase	NO
AT1G53490	5	1:19965455-19965500	+	CE	0.63229	0.9563	-0.324	0.997	K2	1.3646	RING/U-box superfamily protein	RING/U-box superfamily protein	Zinc finger, RING-type | Zinc finger, RING/FYVE/PHD-type	NO
AT1G53490	12	1:19965636-19965825	+	RI	0.2499	0.097594	0.1523	0.945	K4	2.819	RING/U-box superfamily protein	RING/U-box superfamily protein	Zinc finger, RING-type | Zinc finger, RING/FYVE/PHD-type	NO
AT1G53780	23	1:20076206-20076306	-	RI	0.75041	0.59173	0.15867	0.999	K3	1.3696	peptidyl-prolyl cis-trans isomerases;hydrolases;nucleoside-triphosphatases;ATP binding;nucleotide binding;ATPases	peptidyl-prolyl cis-trans isomerases;hydrolases;nucleoside-triphosphatases;ATP binding;nucleotide binding;ATPases; FUNCTIONS IN: in 6 functions; INVOLVED IN: protein folding, protein catabolic process; CONTAINS InterPro DOMAIN/s: ATPase, AAA-type, core (InterPro:IPR003959), Cyclophilin-like (InterPro:IPR015891), Peptidyl-prolyl cis-trans isomerase, cyclophilin-type (InterPro:IPR002130), ATPase, A…	26S proteasome subunit P45 | AAA+ ATPase domain | ATPase, AAA-type, conserved site | ATPase, AAA-type, core | Cyclophilin-like domain | Cyclophilin-type peptidyl-prolyl cis-trans isomerase domain | P-loop containing nucleoside triphosphate hydrolase	NO
AT1G53870	4	1:20112592-20112700	+	RI	0.20155	0.32171	-0.12016	0.977	K1	0.911	Protein of unknown function (DUF567)	Protein of unknown function (DUF567); CONTAINS InterPro DOMAIN/s: Protein of unknown function DUF567 (InterPro:IPR007612); BEST Arabidopsis thaliana protein match is: Protein of unknown function (DUF567) (TAIR:AT1G53890.1); BEST Arabidopsis thaliana protein match is: Protein of unknown function (DUF567) (TAIR:AT1G53890.2)	LURP1-like domain | Tubby C-terminal-like domain	NO
AT1G54160	7	1:20218163-20218247	-	RI	0.33572	0.11594	0.21977	0.967	K1	0.974	nuclear factor Y, subunit A5	nuclear factor Y, subunit A5 (NF-YA5); FUNCTIONS IN: sequence-specific DNA binding transcription factor activity, specific transcriptional repressor activity; INVOLVED IN: response to water deprivation, negative regulation of gene-specific transcription, regulation of transcription, DNA-dependent; LOCATED IN: CCAAT-binding factor complex, nucleus; EXPRESSED IN: 10 plant structures; EXPRESSED DURI…	CCAAT-binding factor, conserved site | CCAAT-binding transcription factor, subunit B	NO
AT1G54210	7	1:20241650-20241718	+	CE	0.87578	0.98469	-0.10891	1	K5	1.7079	Ubiquitin-like superfamily protein	AUTOPHAGY 12 A (ATG12A); INVOLVED IN: autophagy, protein ubiquitination involved in ubiquitin-dependent protein catabolic process; LOCATED IN: cytoplasm; EXPRESSED IN: 20 plant structures; EXPRESSED DURING: 12 growth stages; CONTAINS InterPro DOMAIN/s: Autophagy-related protein 12 (InterPro:IPR007242); BEST Arabidopsis thaliana protein match is: Ubiquitin-like superfamily protein (TAIR:AT3G13970.…	Ubiquitin-like protein Atg12 | Ubiquitin-related domain	NO
AT1G54370	22	1:20294733-20294743	-	AA	0.38892	0.24144	0.14747	0.989	K3	2.5528	sodium hydrogen exchanger 5	sodium hydrogen exchanger 5 (NHX5); FUNCTIONS IN: sodium:hydrogen antiporter activity, sodium ion transmembrane transporter activity; INVOLVED IN: lithium ion transport, sodium ion transport; LOCATED IN: integral to membrane; EXPRESSED IN: 23 plant structures; EXPRESSED DURING: 13 growth stages; CONTAINS InterPro DOMAIN/s: Na+/H+ exchanger, subfamily (InterPro:IPR004709), Na+/H+ exchanger, isofor…	Cation/H+ exchanger | Cation/H+ exchanger, CPA1 family | Na+/H+ exchanger	NO
AT1G54370	26	1:20294428-20294436	-	AD	0.68412	0.28085	0.40327	1	K2	1.5211	sodium hydrogen exchanger 5	sodium hydrogen exchanger 5 (NHX5); FUNCTIONS IN: sodium:hydrogen antiporter activity, sodium ion transmembrane transporter activity; INVOLVED IN: lithium ion transport, sodium ion transport; LOCATED IN: integral to membrane; EXPRESSED IN: 23 plant structures; EXPRESSED DURING: 13 growth stages; CONTAINS InterPro DOMAIN/s: Na+/H+ exchanger, subfamily (InterPro:IPR004709), Na+/H+ exchanger, isofor…	Cation/H+ exchanger | Cation/H+ exchanger, CPA1 family | Na+/H+ exchanger	NO
AT1G54370	25	1:20294437-20294465	-	AD	0.70552	0.2641	0.44141	1	K2	1.5211	sodium hydrogen exchanger 5	sodium hydrogen exchanger 5 (NHX5); FUNCTIONS IN: sodium:hydrogen antiporter activity, sodium ion transmembrane transporter activity; INVOLVED IN: lithium ion transport, sodium ion transport; LOCATED IN: integral to membrane; EXPRESSED IN: 23 plant structures; EXPRESSED DURING: 13 growth stages; CONTAINS InterPro DOMAIN/s: Na+/H+ exchanger, subfamily (InterPro:IPR004709), Na+/H+ exchanger, isofor…	Cation/H+ exchanger | Cation/H+ exchanger, CPA1 family | Na+/H+ exchanger	NO
AT1G54370	20	1:20294825-20294885	-	CE	0.74725	0.89673	-0.14948	0.997	K3	2.5528	sodium hydrogen exchanger 5	sodium hydrogen exchanger 5 (NHX5); FUNCTIONS IN: sodium:hydrogen antiporter activity, sodium ion transmembrane transporter activity; INVOLVED IN: lithium ion transport, sodium ion transport; LOCATED IN: integral to membrane; EXPRESSED IN: 23 plant structures; EXPRESSED DURING: 13 growth stages; CONTAINS InterPro DOMAIN/s: Na+/H+ exchanger, subfamily (InterPro:IPR004709), Na+/H+ exchanger, isofor…	Cation/H+ exchanger | Cation/H+ exchanger, CPA1 family | Na+/H+ exchanger	NO
AT1G54370	37	1:20294365-20294427	-	RI	0.57765	0.23629	0.34136	1	K7	3.3701	sodium hydrogen exchanger 5	sodium hydrogen exchanger 5 (NHX5); FUNCTIONS IN: sodium:hydrogen antiporter activity, sodium ion transmembrane transporter activity; INVOLVED IN: lithium ion transport, sodium ion transport; LOCATED IN: integral to membrane; EXPRESSED IN: 23 plant structures; EXPRESSED DURING: 13 growth stages; CONTAINS InterPro DOMAIN/s: Na+/H+ exchanger, subfamily (InterPro:IPR004709), Na+/H+ exchanger, isofor…	Cation/H+ exchanger | Cation/H+ exchanger, CPA1 family | Na+/H+ exchanger	NO
AT1G54370	30	1:20294744-20294824	-	RI	0.33245	0.19567	0.13678	0.926	K7	3.3701	sodium hydrogen exchanger 5	sodium hydrogen exchanger 5 (NHX5); FUNCTIONS IN: sodium:hydrogen antiporter activity, sodium ion transmembrane transporter activity; INVOLVED IN: lithium ion transport, sodium ion transport; LOCATED IN: integral to membrane; EXPRESSED IN: 23 plant structures; EXPRESSED DURING: 13 growth stages; CONTAINS InterPro DOMAIN/s: Na+/H+ exchanger, subfamily (InterPro:IPR004709), Na+/H+ exchanger, isofor…	Cation/H+ exchanger | Cation/H+ exchanger, CPA1 family | Na+/H+ exchanger	NO
AT1G54370	28	1:20294886-20294971	-	RI	0.32913	0.15485	0.17428	0.999	K7	3.3701	sodium hydrogen exchanger 5	sodium hydrogen exchanger 5 (NHX5); FUNCTIONS IN: sodium:hydrogen antiporter activity, sodium ion transmembrane transporter activity; INVOLVED IN: lithium ion transport, sodium ion transport; LOCATED IN: integral to membrane; EXPRESSED IN: 23 plant structures; EXPRESSED DURING: 13 growth stages; CONTAINS InterPro DOMAIN/s: Na+/H+ exchanger, subfamily (InterPro:IPR004709), Na+/H+ exchanger, isofor…	Cation/H+ exchanger | Cation/H+ exchanger, CPA1 family | Na+/H+ exchanger	NO
AT1G54370	24	1:20295164-20295244	-	RI	0.57507	0.38472	0.19036	0.995	K1	0.9985	sodium hydrogen exchanger 5	sodium hydrogen exchanger 5 (NHX5); FUNCTIONS IN: sodium:hydrogen antiporter activity, sodium ion transmembrane transporter activity; INVOLVED IN: lithium ion transport, sodium ion transport; LOCATED IN: integral to membrane; EXPRESSED IN: 23 plant structures; EXPRESSED DURING: 13 growth stages; CONTAINS InterPro DOMAIN/s: Na+/H+ exchanger, subfamily (InterPro:IPR004709), Na+/H+ exchanger, isofor…	Cation/H+ exchanger | Cation/H+ exchanger, CPA1 family | Na+/H+ exchanger	NO
AT1G54370	10	1:20296560-20296661	-	RI	0.25625	0.072996	0.18325	0.983	K1	0.8631	sodium hydrogen exchanger 5	sodium hydrogen exchanger 5 (NHX5); FUNCTIONS IN: sodium:hydrogen antiporter activity, sodium ion transmembrane transporter activity; INVOLVED IN: lithium ion transport, sodium ion transport; LOCATED IN: integral to membrane; EXPRESSED IN: 23 plant structures; EXPRESSED DURING: 13 growth stages; CONTAINS InterPro DOMAIN/s: Na+/H+ exchanger, subfamily (InterPro:IPR004709), Na+/H+ exchanger, isofor…	Cation/H+ exchanger | Cation/H+ exchanger, CPA1 family | Na+/H+ exchanger	NO
AT1G54390	11	1:20306213-20306216	-	AA	0.71121	0.88838	-0.17716	0.998	K2	1.1984	PHD finger protein-related	INHIBITOR OF GROWTH 2 (ING2); CONTAINS InterPro DOMAIN/s: Zinc finger, PHD-type (InterPro:IPR001965), Zinc finger, FYVE/PHD-type (InterPro:IPR011011), Zinc finger, PHD-finger (InterPro:IPR019787); BEST Arabidopsis thaliana protein match is: RING/FYVE/PHD zinc finger superfamily protein (TAIR:AT3G24010.1)	ING family | Inhibitor of growth protein, N-terminal | PHD finger protein ING2 | Zinc finger, FYVE/PHD-type | Zinc finger, PHD-finger | Zinc finger, PHD-type | Zinc finger, RING/FYVE/PHD-type	NO
AT1G54390	12	1:20306153-20306212	-	CE	0.74494	0.9114	-0.16647	1	K2	1.1984	PHD finger protein-related	INHIBITOR OF GROWTH 2 (ING2); CONTAINS InterPro DOMAIN/s: Zinc finger, PHD-type (InterPro:IPR001965), Zinc finger, FYVE/PHD-type (InterPro:IPR011011), Zinc finger, PHD-finger (InterPro:IPR019787); BEST Arabidopsis thaliana protein match is: RING/FYVE/PHD zinc finger superfamily protein (TAIR:AT3G24010.1)	ING family | Inhibitor of growth protein, N-terminal | PHD finger protein ING2 | Zinc finger, FYVE/PHD-type | Zinc finger, PHD-finger | Zinc finger, PHD-type | Zinc finger, RING/FYVE/PHD-type	NO
AT1G54440	28	1:20326957-20326961	+	AD	0.352	0.17323	0.17877	0.948	K2	1.6906	Polynucleotidyl transferase, ribonuclease H fold protein with HRDC domain	Polynucleotidyl transferase, ribonuclease H fold protein with HRDC domain; FUNCTIONS IN: 3'-5' exonuclease activity, nucleic acid binding; INVOLVED IN: nucleobase, nucleoside, nucleotide and nucleic acid metabolic process; LOCATED IN: intracellular; EXPRESSED IN: 21 plant structures; EXPRESSED DURING: 13 growth stages; CONTAINS InterPro DOMAIN/s: Polynucleotidyl transferase, ribonuclease H fold (…	3'-5' exonuclease domain | HRDC domain | HRDC-like | Ribonuclease H-like domain	NO
AT1G54460	8	1:20342203-20342291	-	RI	0.20485	0.053661	0.15119	0.996	K1	0.7449	TPX2 (targeting protein for Xklp2) protein family	TPX2 (targeting protein for Xklp2) protein family; FUNCTIONS IN: molecular_function unknown; INVOLVED IN: biological_process unknown; LOCATED IN: cellular_component unknown; EXPRESSED IN: 24 plant structures; EXPRESSED DURING: 15 growth stages; CONTAINS InterPro DOMAIN/s: Xklp2 targeting protein (InterPro:IPR009675); BEST Arabidopsis thaliana protein match is: WVD2-like 1 (TAIR:AT3G04630.3)	TPX2, C-terminal domain	NO
AT1G54510	18	1:20360153-20360202	-	CE	0.63363	0.96613	-0.3325	0.999	K2	1.365	NIMA-related serine/threonine kinase 1	NIMA-related serine/threonine kinase 1 (NEK1); FUNCTIONS IN: protein serine/threonine kinase activity, protein kinase activity, kinase activity, ATP binding; INVOLVED IN: protein amino acid phosphorylation; LOCATED IN: cellular_component unknown; EXPRESSED IN: 18 plant structures; EXPRESSED DURING: 7 growth stages; CONTAINS InterPro DOMAIN/s: Protein kinase, ATP binding site (InterPro:IPR017441),…	Protein kinase domain | Protein kinase, ATP binding site | Protein kinase-like domain | Serine/threonine-protein kinase, active site | Serine/threonine/dual specificity protein kinase, catalytic domain	NO
AT1G54730	37	1:20427344-20428048	+	RI	0.17867	0.072917	0.10576	0.979	K5	2.474	Major facilitator superfamily protein	Major facilitator superfamily protein; FUNCTIONS IN: carbohydrate transmembrane transporter activity, sugar:hydrogen symporter activity; INVOLVED IN: transport, transmembrane transport; LOCATED IN: integral to membrane, membrane; EXPRESSED IN: 22 plant structures; EXPRESSED DURING: 13 growth stages; CONTAINS InterPro DOMAIN/s: Sugar transporter, conserved site (InterPro:IPR005829), Major facilita…	General substrate transporter | Major facilitator superfamily domain | Major facilitator superfamily domain, general substrate transporter | Sugar transporter, conserved site | Sugar/inositol transporter	NO
AT1G54830	5	1:20451660-20451667	+	AA	0.71258	0.90116	-0.18858	0.921	K1	0.9321	nuclear factor Y, subunit C3	nuclear factor Y, subunit C3 (NF-YC3); FUNCTIONS IN: DNA binding, sequence-specific DNA binding transcription factor activity; INVOLVED IN: regulation of transcription, DNA-dependent; LOCATED IN: nucleus, intracellular; EXPRESSED IN: 24 plant structures; EXPRESSED DURING: 15 growth stages; CONTAINS InterPro DOMAIN/s: Transcription factor CBF/NF-Y/archaeal histone (InterPro:IPR003958), Histone-fol…	Histone-fold | Transcription factor CBF/NF-Y/archaeal histone | Transcriptional activator NFYC/HAP5 subunit	NO
AT1G55250	21	1:20608893-20608902	+	AA	0.78759	0.90078	-0.11319	0.945	K2	0.8068	histone mono-ubiquitination 2	histone mono-ubiquitination 2; histone mono-ubiquitination 2 (HUB2); CONTAINS InterPro DOMAIN/s: Zinc finger, RING-type, conserved site (InterPro:IPR017907), Zinc finger, RING-type (InterPro:IPR001841); CONTAINS InterPro DOMAIN/s: Zinc finger, RING-type, conserved site (InterPro:IPR017907), Zinc finger, RING-type (InterPro:IPR001841), Zinc finger, C3HC4 RING-type (InterPro:IPR018957); BEST Arabid…	Zinc finger, C3HC4 RING-type | Zinc finger, RING-type | Zinc finger, RING-type, conserved site | Zinc finger, RING/FYVE/PHD-type	NO
AT1G55250	32	1:20609957-20609985	+	CE	0.32167	0.1946	0.12706	0.915	K3	2.0955	histone mono-ubiquitination 2	histone mono-ubiquitination 2; histone mono-ubiquitination 2 (HUB2); CONTAINS InterPro DOMAIN/s: Zinc finger, RING-type, conserved site (InterPro:IPR017907), Zinc finger, RING-type (InterPro:IPR001841); CONTAINS InterPro DOMAIN/s: Zinc finger, RING-type, conserved site (InterPro:IPR017907), Zinc finger, RING-type (InterPro:IPR001841), Zinc finger, C3HC4 RING-type (InterPro:IPR018957); BEST Arabid…	Zinc finger, C3HC4 RING-type | Zinc finger, RING-type | Zinc finger, RING-type, conserved site | Zinc finger, RING/FYVE/PHD-type	NO
AT1G55250	39	1:20609986-20610177	+	RI	0.33748	0.19848	0.139	0.91	K3	2.1658	histone mono-ubiquitination 2	histone mono-ubiquitination 2; histone mono-ubiquitination 2 (HUB2); CONTAINS InterPro DOMAIN/s: Zinc finger, RING-type, conserved site (InterPro:IPR017907), Zinc finger, RING-type (InterPro:IPR001841); CONTAINS InterPro DOMAIN/s: Zinc finger, RING-type, conserved site (InterPro:IPR017907), Zinc finger, RING-type (InterPro:IPR001841), Zinc finger, C3HC4 RING-type (InterPro:IPR018957); BEST Arabid…	Zinc finger, C3HC4 RING-type | Zinc finger, RING-type | Zinc finger, RING-type, conserved site | Zinc finger, RING/FYVE/PHD-type	NO
AT1G55310	10	1:20631558-20631560	+	AA	0.20169	0.39343	-0.19175	0.988	K3	2.057	SC35-like splicing factor 33	SC35-like splicing factor 33 (SR33); CONTAINS InterPro DOMAIN/s: RNA recognition motif, RNP-1 (InterPro:IPR000504), Nucleotide-binding, alpha-beta plait (InterPro:IPR012677); FUNCTIONS IN: protein binding, RNA binding; BEST Arabidopsis thaliana protein match is: SC35-like splicing factor 30A (TAIR:AT3G13570.1); INVOLVED IN: nuclear mRNA splicing, via spliceosome, RNA splicing; LOCATED IN: interch…	Nucleotide-binding, alpha-beta plait | RNA recognition motif domain	NO
AT1G55310	12	1:20631687-20631722	+	CE	0.3852	0.55309	-0.16789	0.994	K3	2.057	SC35-like splicing factor 33	SC35-like splicing factor 33 (SR33); CONTAINS InterPro DOMAIN/s: RNA recognition motif, RNP-1 (InterPro:IPR000504), Nucleotide-binding, alpha-beta plait (InterPro:IPR012677); FUNCTIONS IN: protein binding, RNA binding; BEST Arabidopsis thaliana protein match is: SC35-like splicing factor 30A (TAIR:AT3G13570.1); INVOLVED IN: nuclear mRNA splicing, via spliceosome, RNA splicing; LOCATED IN: interch…	Nucleotide-binding, alpha-beta plait | RNA recognition motif domain	NO
AT1G55310	11	1:20631120-20631557	+	RI	0.19553	0.38466	-0.18913	0.998	K3	2.0624	SC35-like splicing factor 33	SC35-like splicing factor 33 (SR33); CONTAINS InterPro DOMAIN/s: RNA recognition motif, RNP-1 (InterPro:IPR000504), Nucleotide-binding, alpha-beta plait (InterPro:IPR012677); FUNCTIONS IN: protein binding, RNA binding; BEST Arabidopsis thaliana protein match is: SC35-like splicing factor 30A (TAIR:AT3G13570.1); INVOLVED IN: nuclear mRNA splicing, via spliceosome, RNA splicing; LOCATED IN: interch…	Nucleotide-binding, alpha-beta plait | RNA recognition motif domain	NO
AT1G55310	15	1:20631723-20631884	+	RI	0.25839	0.44043	-0.18204	1	K3	2.0624	SC35-like splicing factor 33	SC35-like splicing factor 33 (SR33); CONTAINS InterPro DOMAIN/s: RNA recognition motif, RNP-1 (InterPro:IPR000504), Nucleotide-binding, alpha-beta plait (InterPro:IPR012677); FUNCTIONS IN: protein binding, RNA binding; BEST Arabidopsis thaliana protein match is: SC35-like splicing factor 30A (TAIR:AT3G13570.1); INVOLVED IN: nuclear mRNA splicing, via spliceosome, RNA splicing; LOCATED IN: interch…	Nucleotide-binding, alpha-beta plait | RNA recognition motif domain	NO
AT1G55340	7	1:20652902-20652931	+	AA	0.49895	0.70679	-0.20784	0.998	K2	1.5622	Protein of unknown function (DUF1639)	Protein of unknown function (DUF1639); FUNCTIONS IN: molecular_function unknown; INVOLVED IN: biological_process unknown; LOCATED IN: cellular_component unknown; CONTAINS InterPro DOMAIN/s: Protein of unknown function DUF1639 (InterPro:IPR012438); BEST Arabidopsis thaliana protein match is: Protein of unknown function (DUF1639) (TAIR:AT3G03880.1)	Protein of unknown function DUF1639	NO
AT1G55500	11	1:20720570-20720608	+	AA	0.62451	0.45249	0.17201	0.914	K1	0.9975	evolutionarily conserved C-terminal region 4	evolutionarily conserved C-terminal region 4 (ECT4); FUNCTIONS IN: molecular_function unknown; INVOLVED IN: biological_process unknown; LOCATED IN: cellular_component unknown; EXPRESSED IN: 21 plant structures; EXPRESSED DURING: 11 growth stages; CONTAINS InterPro DOMAIN/s: YTH domain (InterPro:IPR007275); BEST Arabidopsis thaliana protein match is: evolutionarily conserved C-terminal region 2 (T…	YTH domain	NO
AT1G55520	16	1:20726406-20726496	-	RI	0.18646	0.049935	0.13652	1	K1	0.7487	TATA binding protein 2	TATA binding protein 2 (TBP2); CONTAINS InterPro DOMAIN/s: TATA-box binding (InterPro:IPR000814), Beta2-adaptin/TATA-box binding, C-terminal (InterPro:IPR012295), Transcription factor TFIID, C-terminal/DNA glycosylase, N-terminal (InterPro:IPR012294); BEST Arabidopsis thaliana protein match is: TATA binding protein 1 (TAIR:AT3G13445.1)	Beta2-adaptin/TBP, C-terminal domain | TATA-box binding protein	NO
AT1G55590	9	1:20770853-20770942	-	RI	0.76194	0.50832	0.25362	0.999	K3	1.5286	RNI-like superfamily protein	RNI-like superfamily protein; CONTAINS InterPro DOMAIN/s: F-box domain, cyclin-like (InterPro:IPR001810); BEST Arabidopsis thaliana protein match is: F-box/RNI-like superfamily protein (TAIR:AT2G17020.1)	F-box domain	NO
AT1G55690	41	1:20808465-20808533	-	RI	0.78885	0.91843	-0.12958	0.974	K1	0.7742	Sec14p-like phosphatidylinositol transfer family protein	Sec14p-like phosphatidylinositol transfer family protein; CONTAINS InterPro DOMAIN/s: Cellular retinaldehyde-binding/triple function, C-terminal (InterPro:IPR001251), Cellular retinaldehyde-binding/triple function, N-terminal (InterPro:IPR008273), Phosphatidylinositol transfer protein-like, N-terminal (InterPro:IPR011074); BEST Arabidopsis thaliana protein match is: Sec14p-like phosphatidylinosit…	CRAL-TRIO domain | CRAL/TRIO, N-terminal domain	NO
AT1G55750	41	1:20841262-20841375	-	RI	0.19135	0.06287	0.12848	0.954	K3	1.8054	BSD domain (BTF2-like transcription factors, Synapse-associated proteins and DOS2-like proteins)	BSD domain (BTF2-like transcription factors, Synapse-associated proteins and DOS2-like proteins); CONTAINS InterPro DOMAIN/s: Kelch related (InterPro:IPR013089), BSD (InterPro:IPR005607); BEST Arabidopsis thaliana protein match is: BSD domain (BTF2-like transcription factors, Synapse-associated proteins and DOS2-like proteins) (TAIR:AT3G61420.1)	BSD | Pleckstrin homology-like domain | TFIIH subunit Tfb1/p62	NO
AT1G55810	23	1:20862779-20862870	+	RI	0.10803	0.23496	-0.12693	0.96	K1	0.814	uridine kinase-like 3	uridine kinase-like 3 (UKL3); FUNCTIONS IN: uracil phosphoribosyltransferase activity, phosphotransferase activity, alcohol group as acceptor, kinase activity, ATP binding; INVOLVED IN: biosynthetic process, metabolic process; LOCATED IN: cellular_component unknown; EXPRESSED IN: 22 plant structures; EXPRESSED DURING: 13 growth stages; CONTAINS InterPro DOMAIN/s: Phosphoribulokinase/uridine kinas…	P-loop containing nucleoside triphosphate hydrolase | Phosphoribosyltransferase-like | Phosphoribulokinase/uridine kinase | Uridine kinase like	NO
AT1G56440	3	1:21141171-21141200	-	AA	0.95852	0.80514	0.15338	0.952	K1	0.7871	Tetratricopeptide repeat (TPR)-like superfamily protein	Tetratricopeptide repeat (TPR)-like superfamily protein; FUNCTIONS IN: binding; INVOLVED IN: biological_process unknown; LOCATED IN: cellular_component unknown; CONTAINS InterPro DOMAIN/s: Tetratricopeptide TPR-1 (InterPro:IPR001440), Tetratricopeptide-like helical (InterPro:IPR011990), Tetratricopeptide repeat-containing (InterPro:IPR013026), Tetratricopeptide repeat (InterPro:IPR019734); BEST A…	RNA-polymerase II-associated protein 3-like, C-terminal domain | Tetratricopeptide TPR1 | Tetratricopeptide repeat | Tetratricopeptide repeat-containing domain | Tetratricopeptide-like helical domain	NO
AT1G56590	8	1:21204094-21204104	-	AA	0.90551	0.79844	0.10707	0.959	K1	0.796	Clathrin adaptor complexes medium subunit family protein	ZIG SUPPRESSOR 4 (ZIP4); INVOLVED IN: intracellular protein transport, gravitropism, protein targeting to vacuole; LOCATED IN: clathrin vesicle coat, clathrin adaptor complex; EXPRESSED IN: 23 plant structures; EXPRESSED DURING: 15 growth stages; CONTAINS InterPro DOMAIN/s: Clathrin adaptor, mu subunit, conserved site (InterPro:IPR018240), Clathrin adaptor, mu subunit (InterPro:IPR001392), Clathr…	Clathrin adaptor, mu subunit | Clathrin adaptor, mu subunit, C-terminal | Clathrin adaptor, mu subunit, conserved site | Longin-like domain | Mu homology domain	NO
AT1G56720	10	1:21264848-21264921	-	RI	0.13204	0.016781	0.11526	0.994	K1	0.6647	Protein kinase superfamily protein	Protein kinase superfamily protein; FUNCTIONS IN: protein serine/threonine kinase activity, protein kinase activity, kinase activity, ATP binding; INVOLVED IN: protein amino acid phosphorylation; LOCATED IN: cellular_component unknown; EXPRESSED IN: 23 plant structures; EXPRESSED DURING: 13 growth stages; CONTAINS InterPro DOMAIN/s: Protein kinase, ATP binding site (InterPro:IPR017441), Protein k…	Protein kinase domain | Protein kinase, ATP binding site | Protein kinase-like domain | Serine/threonine-protein kinase, active site	NO
AT1G57600	6	1:21334338-21334342	-	AD	0.61983	0.86391	-0.24408	0.927	K2	1.3816	MBOAT (membrane bound O-acyl transferase) family protein	MBOAT (membrane bound O-acyl transferase) family protein; CONTAINS InterPro DOMAIN/s: Membrane bound O-acyl transferase, MBOAT (InterPro:IPR004299)	Membrane bound O-acyl transferase, MBOAT	NO
AT1G57610	6	1:21338481-21338626	-	RI	0.50673	0.40134	0.10539	0.91	K1	1	Protein of unknown function (DUF607)	Protein of unknown function (DUF607); FUNCTIONS IN: molecular_function unknown; INVOLVED IN: biological_process unknown; LOCATED IN: cellular_component unknown; CONTAINS InterPro DOMAIN/s: Protein of unknown function DUF607 (InterPro:IPR006769); BEST Arabidopsis thaliana protein match is: Protein of unknown function (DUF607) (TAIR:AT1G09575.1)	Coiled-coil domain containing protein 109, C-terminal	NO
AT1G58180	11	1:21539301-21539393	-	RI	0.21829	0.11694	0.10135	0.998	K4	2.0219	beta carbonic anhydrase 6	beta carbonic anhydrase 6 (BCA6); FUNCTIONS IN: carbonate dehydratase activity, zinc ion binding; INVOLVED IN: carbon utilization; LOCATED IN: mitochondrion; EXPRESSED IN: 23 plant structures; EXPRESSED DURING: 13 growth stages; CONTAINS InterPro DOMAIN/s: Carbonic anhydrase, prokaryotic-like, conserved site (InterPro:IPR015892), Carbonic anhydrase (InterPro:IPR001765); BEST Arabidopsis thaliana …	Carbonic anhydrase | Carbonic anhydrase, prokaryotic-like, conserved site	NO
AT1G58200	4	1:21552835-21552838	-	AD	0.50417	0.67427	-0.1701	0.94	K2	1.0292	MSCS-like 3	MSCS-like 3 (MSL3); FUNCTIONS IN: ion channel activity; INVOLVED IN: plastid organization, response to osmotic stress; LOCATED IN: membrane, plastid envelope; EXPRESSED IN: 26 plant structures; EXPRESSED DURING: 15 growth stages; CONTAINS InterPro DOMAIN/s: Mechanosensitive ion channel MscS (InterPro:IPR006685), Like-Sm ribonucleoprotein (LSM)-related domain (InterPro:IPR010920); BEST Arabidopsis…	Like-Sm (LSM) domain | Mechanosensitive ion channel MscS	NO
AT1G58590	9	1:21743612-21743756	-	RI	0.11191	0.33158	-0.21967	0.982	K2	1.5682	other RNA			NO
AT1G58602	28	1:21763788-21763866	+	RI	0.70057	0.55089	0.14968	0.955	K8	3.242	LRR and NB-ARC domains-containing disease resistance protein	LRR and NB-ARC domains-containing disease resistance protein; FUNCTIONS IN: ATP binding; INVOLVED IN: apoptosis, defense response; INVOLVED IN: defense response, apoptosis; CONTAINS InterPro DOMAIN/s: NB-ARC (InterPro:IPR002182), Disease resistance protein (InterPro:IPR000767); BEST Arabidopsis thaliana protein match is: Disease resistance protein (CC-NBS-LRR class) family (TAIR:AT1G59218.2)	NB-ARC | P-loop containing nucleoside triphosphate hydrolase	NO
AT1G58807	10	1:21782347-21782450	+	EI/RI	0.92477	0.74872	0.17605	0.997	K1	0.8488	Disease resistance protein (CC-NBS-LRR class) family	Disease resistance protein (CC-NBS-LRR class) family; FUNCTIONS IN: ATP binding; INVOLVED IN: apoptosis, defense response; INVOLVED IN: defense response, apoptosis; LOCATED IN: cellular_component unknown; EXPRESSED IN: cultured cell; CONTAINS InterPro DOMAIN/s: NB-ARC (InterPro:IPR002182), Disease resistance protein (InterPro:IPR000767); BEST Arabidopsis thaliana protein match is: Disease resista…	NB-ARC | P-loop containing nucleoside triphosphate hydrolase	NO
AT1G58807	10	1:21782347-21782450	+	RI	0.92477	0.74872	0.17605	0.997	K1	0.8488	Disease resistance protein (CC-NBS-LRR class) family	Disease resistance protein (CC-NBS-LRR class) family; FUNCTIONS IN: ATP binding; INVOLVED IN: apoptosis, defense response; INVOLVED IN: defense response, apoptosis; LOCATED IN: cellular_component unknown; EXPRESSED IN: cultured cell; CONTAINS InterPro DOMAIN/s: NB-ARC (InterPro:IPR002182), Disease resistance protein (InterPro:IPR000767); BEST Arabidopsis thaliana protein match is: Disease resista…	NB-ARC | P-loop containing nucleoside triphosphate hydrolase	NO
AT1G58807	12	1:21783290-21783377	+	RI	0.83527	0.61407	0.22119	1	K1	0.9751	Disease resistance protein (CC-NBS-LRR class) family	Disease resistance protein (CC-NBS-LRR class) family; FUNCTIONS IN: ATP binding; INVOLVED IN: apoptosis, defense response; INVOLVED IN: defense response, apoptosis; LOCATED IN: cellular_component unknown; EXPRESSED IN: cultured cell; CONTAINS InterPro DOMAIN/s: NB-ARC (InterPro:IPR002182), Disease resistance protein (InterPro:IPR000767); BEST Arabidopsis thaliana protein match is: Disease resista…	NB-ARC | P-loop containing nucleoside triphosphate hydrolase	NO
AT1G59124	9	1:21819548-21819635	+	RI	0.79618	0.50824	0.28794	1	K1	0.9999	Disease resistance protein (CC-NBS-LRR class) family	Disease resistance protein (CC-NBS-LRR class) family; FUNCTIONS IN: ATP binding; INVOLVED IN: apoptosis, defense response; LOCATED IN: cellular_component unknown; CONTAINS InterPro DOMAIN/s: NB-ARC (InterPro:IPR002182), Disease resistance protein (InterPro:IPR000767); BEST Arabidopsis thaliana protein match is: Disease resistance protein (CC-NBS-LRR class) family (TAIR:AT1G58807.2)		NO
AT1G59750	20	1:21982990-21982995	+	AD	0.55654	0.68676	-0.13022	0.987	K3	1.7931	auxin response factor 1	auxin response factor 1 (ARF1); CONTAINS InterPro DOMAIN/s: Aux/IAA-ARF-dimerisation (InterPro:IPR011525), Transcriptional factor B3 (InterPro:IPR003340), AUX/IAA protein (InterPro:IPR003311), Auxin response factor (InterPro:IPR010525); BEST Arabidopsis thaliana protein match is: auxin response factor 11 (TAIR:AT2G46530.1); BEST Arabidopsis thaliana protein match is: auxin response factor 11 (TAI…	AUX/IAA protein | Aux/IAA-ARF-dimerisation | Auxin response factor | B3 DNA binding domain | DNA-binding pseudobarrel domain	NO
AT1G59990	17	1:22090419-22090491	-	RI	0.17309	0.027107	0.14598	0.996	K1	0.7374	DEA(D/H)-box RNA helicase family protein	DEA(D/H)-box RNA helicase family protein; FUNCTIONS IN: helicase activity, ATP-dependent helicase activity, nucleic acid binding, ATP binding; INVOLVED IN: biological_process unknown; LOCATED IN: chloroplast; EXPRESSED IN: 21 plant structures; EXPRESSED DURING: 13 growth stages; CONTAINS InterPro DOMAIN/s: RNA helicase, DEAD-box type, Q motif (InterPro:IPR014014), DNA/RNA helicase, DEAD/DEAH box …	DEAD/DEAH box helicase domain | Helicase, C-terminal | Helicase, superfamily 1/2, ATP-binding domain | P-loop containing nucleoside triphosphate hydrolase | RNA helicase, DEAD-box type, Q motif	NO
AT1G60200	8	1:22204242-22204553	-	CE	0.33401	0.76268	-0.42867	1	K4	1.8879	splicing factor PWI domain-containing protein / RNA recognition motif (RRM)-containing protein	splicing factor PWI domain-containing protein / RNA recognition motif (RRM)-containing protein; FUNCTIONS IN: nucleotide binding, nucleic acid binding; INVOLVED IN: mRNA processing; LOCATED IN: chloroplast; EXPRESSED IN: 24 plant structures; EXPRESSED DURING: 13 growth stages; CONTAINS InterPro DOMAIN/s: RNA recognition motif, RNP-1 (InterPro:IPR000504), Nucleotide-binding, alpha-beta plait (Inte…	Nucleotide-binding, alpha-beta plait | PWI domain | RNA recognition motif domain	NO
AT1G60200	10	1:22203879-22203946	-	CE	0.34441	0.76196	-0.41755	1	K4	1.8879	splicing factor PWI domain-containing protein / RNA recognition motif (RRM)-containing protein	splicing factor PWI domain-containing protein / RNA recognition motif (RRM)-containing protein; FUNCTIONS IN: nucleotide binding, nucleic acid binding; INVOLVED IN: mRNA processing; LOCATED IN: chloroplast; EXPRESSED IN: 24 plant structures; EXPRESSED DURING: 13 growth stages; CONTAINS InterPro DOMAIN/s: RNA recognition motif, RNP-1 (InterPro:IPR000504), Nucleotide-binding, alpha-beta plait (Inte…	Nucleotide-binding, alpha-beta plait | PWI domain | RNA recognition motif domain	NO
AT1G60200	12	1:22203750-22203878	-	RI	0.33812	0.74412	-0.406	1	K4	1.8919	splicing factor PWI domain-containing protein / RNA recognition motif (RRM)-containing protein	splicing factor PWI domain-containing protein / RNA recognition motif (RRM)-containing protein; FUNCTIONS IN: nucleotide binding, nucleic acid binding; INVOLVED IN: mRNA processing; LOCATED IN: chloroplast; EXPRESSED IN: 24 plant structures; EXPRESSED DURING: 13 growth stages; CONTAINS InterPro DOMAIN/s: RNA recognition motif, RNP-1 (InterPro:IPR000504), Nucleotide-binding, alpha-beta plait (Inte…	Nucleotide-binding, alpha-beta plait | PWI domain | RNA recognition motif domain	NO
AT1G60200	10	1:22203947-22204241	-	RI	0.32339	0.72401	-0.40063	1	K4	1.8919	splicing factor PWI domain-containing protein / RNA recognition motif (RRM)-containing protein	splicing factor PWI domain-containing protein / RNA recognition motif (RRM)-containing protein; FUNCTIONS IN: nucleotide binding, nucleic acid binding; INVOLVED IN: mRNA processing; LOCATED IN: chloroplast; EXPRESSED IN: 24 plant structures; EXPRESSED DURING: 13 growth stages; CONTAINS InterPro DOMAIN/s: RNA recognition motif, RNP-1 (InterPro:IPR000504), Nucleotide-binding, alpha-beta plait (Inte…	Nucleotide-binding, alpha-beta plait | PWI domain | RNA recognition motif domain	NO
AT1G60260	25	1:22219917-22220015	-	RI	0.58521	0.35241	0.2328	0.999	K1	0.9974	beta glucosidase 5	beta glucosidase 5 (BGLU5); FUNCTIONS IN: cation binding, hydrolase activity, hydrolyzing O-glycosyl compounds, catalytic activity; INVOLVED IN: carbohydrate metabolic process; LOCATED IN: endomembrane system; CONTAINS InterPro DOMAIN/s: Glycoside hydrolase, family 1 (InterPro:IPR001360), Glycoside hydrolase, family 1, active site (InterPro:IPR018120), Glycoside hydrolase, catalytic core (InterPr…		NO
AT1G60270	33	1:22222419-22222531	-	RI	0.4521	0.84555	-0.39345	0.999	K3	2.1252	beta glucosidase 6	beta glucosidase 6 (BGLU6); FUNCTIONS IN: cation binding, hydrolase activity, hydrolyzing O-glycosyl compounds, catalytic activity; INVOLVED IN: carbohydrate metabolic process; LOCATED IN: endomembrane system; EXPRESSED IN: 16 plant structures; EXPRESSED DURING: 10 growth stages; CONTAINS InterPro DOMAIN/s: Glycoside hydrolase, family 1 (InterPro:IPR001360), Glycoside hydrolase, family 1, active …	Glycoside hydrolase, catalytic domain | Glycoside hydrolase, family 1 | Glycoside hydrolase, family 1, active site | Glycoside hydrolase, superfamily	NO
AT1G60270	30	1:22222756-22222833	-	RI	0.31381	0.050135	0.26368	0.999	K3	2.1252	beta glucosidase 6	beta glucosidase 6 (BGLU6); FUNCTIONS IN: cation binding, hydrolase activity, hydrolyzing O-glycosyl compounds, catalytic activity; INVOLVED IN: carbohydrate metabolic process; LOCATED IN: endomembrane system; EXPRESSED IN: 16 plant structures; EXPRESSED DURING: 10 growth stages; CONTAINS InterPro DOMAIN/s: Glycoside hydrolase, family 1 (InterPro:IPR001360), Glycoside hydrolase, family 1, active …	Glycoside hydrolase, catalytic domain | Glycoside hydrolase, family 1 | Glycoside hydrolase, family 1, active site | Glycoside hydrolase, superfamily	NO
AT1G60270	12	1:22224062-22224128	-	RI	0.48083	0.2366	0.24423	0.917	K2	1.5123	beta glucosidase 6	beta glucosidase 6 (BGLU6); FUNCTIONS IN: cation binding, hydrolase activity, hydrolyzing O-glycosyl compounds, catalytic activity; INVOLVED IN: carbohydrate metabolic process; LOCATED IN: endomembrane system; EXPRESSED IN: 16 plant structures; EXPRESSED DURING: 10 growth stages; CONTAINS InterPro DOMAIN/s: Glycoside hydrolase, family 1 (InterPro:IPR001360), Glycoside hydrolase, family 1, active …	Glycoside hydrolase, catalytic domain | Glycoside hydrolase, family 1 | Glycoside hydrolase, family 1, active site | Glycoside hydrolase, superfamily	NO
AT1G60510	7	1:22295948-22296056	+	RI	0.4667	0.29607	0.17063	0.912	K2	1.4507		pseudogene, putative interferon-induced GTP-binding protein mx, blastp match of 42% identity and 8.3e-35 P-value to GP|1399454|gb|AAC60215.1||U47946 RBTMx3 {Oncorhynchus mykiss}		NO
AT1G60560	14	1:22309322-22309396	-	EI/RI	0.82466	0.54999	0.27467	0.938	K1	0.9641	SWIM zinc finger family protein	SWIM zinc finger family protein; BEST Arabidopsis thaliana protein match is: zinc ion binding (TAIR:AT4G13970.1); FUNCTIONS IN: zinc ion binding; INVOLVED IN: biological_process unknown; LOCATED IN: cellular_component unknown; EXPRESSED IN: 22 plant structures; EXPRESSED DURING: 13 growth stages; CONTAINS InterPro DOMAIN/s: Zinc finger, SWIM-type (InterPro:IPR007527)	Zinc finger, SWIM-type	NO
AT1G60560	14	1:22309322-22309396	-	RI	0.82466	0.54999	0.27467	0.938	K1	0.9641	SWIM zinc finger family protein	SWIM zinc finger family protein; BEST Arabidopsis thaliana protein match is: zinc ion binding (TAIR:AT4G13970.1); FUNCTIONS IN: zinc ion binding; INVOLVED IN: biological_process unknown; LOCATED IN: cellular_component unknown; EXPRESSED IN: 22 plant structures; EXPRESSED DURING: 13 growth stages; CONTAINS InterPro DOMAIN/s: Zinc finger, SWIM-type (InterPro:IPR007527)	Zinc finger, SWIM-type	NO
AT1G60690	5	1:22351286-22351446	-	RI	0.092831	0.20662	-0.11379	0.908	K2	1.2128	NAD(P)-linked oxidoreductase superfamily protein	NAD(P)-linked oxidoreductase superfamily protein; FUNCTIONS IN: oxidoreductase activity, aldo-keto reductase activity; INVOLVED IN: oxidation reduction; LOCATED IN: plasma membrane, chloroplast envelope; EXPRESSED IN: 22 plant structures; EXPRESSED DURING: 13 growth stages; CONTAINS InterPro DOMAIN/s: Aldo/keto reductase (InterPro:IPR001395); BEST Arabidopsis thaliana protein match is: NAD(P)-lin…	Aldo/keto reductase | NADP-dependent oxidoreductase domain	NO
AT1G60700	10	1:22352357-22352453	-	RI	0.067803	0.23051	-0.16271	0.957	K1	0.8935	SMAD/FHA domain-containing protein	SMAD/FHA domain-containing protein ; CONTAINS InterPro DOMAIN/s: SMAD/FHA domain (InterPro:IPR008984), Forkhead-associated (FHA) domain (InterPro:IPR000253); BEST Arabidopsis thaliana protein match is: Forkhead-associated (FHA) domain-containing protein (TAIR:AT3G54350.3)	Forkhead-associated (FHA) domain | SMAD/FHA domain	NO
AT1G60900	12	1:22425924-22425926	+	AA	0.34212	0.46062	-0.1185	0.974	K5	3.282	U2 snRNP auxilliary factor, large subunit, splicing factor	U2 snRNP auxilliary factor, large subunit, splicing factor; FUNCTIONS IN: RNA binding, nucleotide binding, nucleic acid binding; INVOLVED IN: mRNA processing; LOCATED IN: nucleus; CONTAINS InterPro DOMAIN/s: RNA recognition motif, RNP-1 (InterPro:IPR000504), Nucleotide-binding, alpha-beta plait (InterPro:IPR012677), U2 snRNP auxilliary factor, large subunit, splicing factor (InterPro:IPR006529); …	Nucleotide-binding, alpha-beta plait | RNA recognition motif domain | U2 snRNP auxilliary factor, large subunit, splicing factor	NO
AT1G60900	12	1:22425404-22425573	+	RI	0.35683	0.46041	-0.10358	0.928	K5	3.2488	U2 snRNP auxilliary factor, large subunit, splicing factor	U2 snRNP auxilliary factor, large subunit, splicing factor; FUNCTIONS IN: RNA binding, nucleotide binding, nucleic acid binding; INVOLVED IN: mRNA processing; LOCATED IN: nucleus; CONTAINS InterPro DOMAIN/s: RNA recognition motif, RNP-1 (InterPro:IPR000504), Nucleotide-binding, alpha-beta plait (InterPro:IPR012677), U2 snRNP auxilliary factor, large subunit, splicing factor (InterPro:IPR006529); …	Nucleotide-binding, alpha-beta plait | RNA recognition motif domain | U2 snRNP auxilliary factor, large subunit, splicing factor	NO
AT1G60900	14	1:22425675-22425923	+	RI	0.30721	0.45727	-0.15005	0.995	K5	3.2488	U2 snRNP auxilliary factor, large subunit, splicing factor	U2 snRNP auxilliary factor, large subunit, splicing factor; FUNCTIONS IN: RNA binding, nucleotide binding, nucleic acid binding; INVOLVED IN: mRNA processing; LOCATED IN: nucleus; CONTAINS InterPro DOMAIN/s: RNA recognition motif, RNP-1 (InterPro:IPR000504), Nucleotide-binding, alpha-beta plait (InterPro:IPR012677), U2 snRNP auxilliary factor, large subunit, splicing factor (InterPro:IPR006529); …	Nucleotide-binding, alpha-beta plait | RNA recognition motif domain | U2 snRNP auxilliary factor, large subunit, splicing factor	NO
AT1G61040	2	1:22483355-22483597	+	AD	0.48612	0.16407	0.32205	0.999	K2	1.3139	plus-3 domain-containing protein	vernalization independence 5 (VIP5); FUNCTIONS IN: DNA binding; INVOLVED IN: positive regulation of transcription, DNA-dependent, negative regulation of flower development; LOCATED IN: nucleus; EXPRESSED IN: 22 plant structures; EXPRESSED DURING: 13 growth stages; CONTAINS InterPro DOMAIN/s: Plus-3 domain, subgroup (InterPro:IPR018144), Plus-3 (InterPro:IPR004343)	Plus-3 | Plus-3 domain, subgroup	NO
AT1G61150	7	1:22542837-22542862	+	CE	0.11722	0.24486	-0.12764	0.987	K4	2.1373	LisH and RanBPM domains containing protein	LisH and RanBPM domains containing protein; FUNCTIONS IN: molecular_function unknown; INVOLVED IN: biological_process unknown; LOCATED IN: cellular_component unknown; EXPRESSED IN: 23 plant structures; EXPRESSED DURING: 13 growth stages; CONTAINS InterPro DOMAIN/s: LisH dimerisation motif, subgroup (InterPro:IPR013720), Ran binding protein, CRA domain (InterPro:IPR019589), CTLH, C-terminal LisH m…	CRA domain | CTLH, C-terminal LisH motif | CTLH/CRA C-terminal to LisH motif domain | LisH dimerisation motif | LisH dimerisation motif, subgroup	NO
AT1G61150	10	1:22542958-22542981	+	CE	0.84247	0.97088	-0.12841	1	K4	2.1373	LisH and RanBPM domains containing protein	LisH and RanBPM domains containing protein; FUNCTIONS IN: molecular_function unknown; INVOLVED IN: biological_process unknown; LOCATED IN: cellular_component unknown; EXPRESSED IN: 23 plant structures; EXPRESSED DURING: 13 growth stages; CONTAINS InterPro DOMAIN/s: LisH dimerisation motif, subgroup (InterPro:IPR013720), Ran binding protein, CRA domain (InterPro:IPR019589), CTLH, C-terminal LisH m…	CRA domain | CTLH, C-terminal LisH motif | CTLH/CRA C-terminal to LisH motif domain | LisH dimerisation motif | LisH dimerisation motif, subgroup	NO
AT1G61150	13	1:22543267-22543367	+	RI	0.14752	0.043948	0.10357	1	K1	0.6379	LisH and RanBPM domains containing protein	LisH and RanBPM domains containing protein; FUNCTIONS IN: molecular_function unknown; INVOLVED IN: biological_process unknown; LOCATED IN: cellular_component unknown; EXPRESSED IN: 23 plant structures; EXPRESSED DURING: 13 growth stages; CONTAINS InterPro DOMAIN/s: LisH dimerisation motif, subgroup (InterPro:IPR013720), Ran binding protein, CRA domain (InterPro:IPR019589), CTLH, C-terminal LisH m…	CRA domain | CTLH, C-terminal LisH motif | CTLH/CRA C-terminal to LisH motif domain | LisH dimerisation motif | LisH dimerisation motif, subgroup	NO
AT1G61190	18	1:22559262-22559336	+	RI	0.93176	0.82255	0.10921	0.978	K2	0.7541	LRR and NB-ARC domains-containing disease resistance protein	LRR and NB-ARC domains-containing disease resistance protein; FUNCTIONS IN: ATP binding; INVOLVED IN: N-terminal protein myristoylation, apoptosis, defense response; LOCATED IN: cellular_component unknown; CONTAINS InterPro DOMAIN/s: NB-ARC (InterPro:IPR002182), Disease resistance protein (InterPro:IPR000767); BEST Arabidopsis thaliana protein match is: LRR and NB-ARC domains-containing disease r…	Leucine-rich repeat | NB-ARC | P-loop containing nucleoside triphosphate hydrolase	NO
AT1G61430	23	1:22664966-22665054	-	RI	0.64946	0.33038	0.31908	0.977	K1	0.971	S-locus lectin protein kinase family protein	S-locus lectin protein kinase family protein; FUNCTIONS IN: in 6 functions; INVOLVED IN: protein amino acid phosphorylation, recognition of pollen; LOCATED IN: endomembrane system; CONTAINS InterPro DOMAIN/s: Curculin-like (mannose-binding) lectin (InterPro:IPR001480), PAN-2 domain (InterPro:IPR013227), Apple-like (InterPro:IPR003609), S-locus receptor kinase, C-terminal (InterPro:IPR021820), Ser…	Apple-like | Bulb-type lectin domain | Concanavalin A-like lectin/glucanase, subgroup | Epidermal growth factor-like domain | PAN-2 domain | Protein kinase domain | Protein kinase-like domain | S-locus glycoprotein | S-locus receptor kinase, C-terminal | S-receptor-like serine/threonine-protein kinase | Serine-threonine/tyrosine-protein kinase catalytic domain | Serine/threonine-protein kinase, a…	NO
AT1G61970	8	1:22906832-22906923	+	CE	0.43589	0.74558	-0.3097	0.999	K3	2.304	Mitochondrial transcription termination factor family protein	Mitochondrial transcription termination factor family protein; FUNCTIONS IN: molecular_function unknown; INVOLVED IN: biological_process unknown; CONTAINS InterPro DOMAIN/s: Mitochodrial transcription termination factor-related (InterPro:IPR003690); BEST Arabidopsis thaliana protein match is: Mitochondrial transcription termination factor family protein (TAIR:AT1G61980.1)	Mitochodrial transcription termination factor-related	NO
AT1G61970	8	1:22906611-22906831	+	RI	0.13295	0.40136	-0.26841	0.996	K3	2.304	Mitochondrial transcription termination factor family protein	Mitochondrial transcription termination factor family protein; FUNCTIONS IN: molecular_function unknown; INVOLVED IN: biological_process unknown; CONTAINS InterPro DOMAIN/s: Mitochodrial transcription termination factor-related (InterPro:IPR003690); BEST Arabidopsis thaliana protein match is: Mitochondrial transcription termination factor family protein (TAIR:AT1G61980.1)	Mitochodrial transcription termination factor-related	NO
AT1G61970	10	1:22906924-22907128	+	RI	0.12785	0.29923	-0.17138	0.976	K3	2.304	Mitochondrial transcription termination factor family protein	Mitochondrial transcription termination factor family protein; FUNCTIONS IN: molecular_function unknown; INVOLVED IN: biological_process unknown; CONTAINS InterPro DOMAIN/s: Mitochodrial transcription termination factor-related (InterPro:IPR003690); BEST Arabidopsis thaliana protein match is: Mitochondrial transcription termination factor family protein (TAIR:AT1G61980.1)	Mitochodrial transcription termination factor-related	NO
AT1G62130	11	1:22967877-22967984	-	RI	0.83213	0.48625	0.34588	0.976	K1	0.982	AAA-type ATPase family protein	AAA-type ATPase family protein; FUNCTIONS IN: nucleoside-triphosphatase activity, ATPase activity, nucleotide binding, ATP binding; INVOLVED IN: biological_process unknown; LOCATED IN: chloroplast; EXPRESSED IN: 16 plant structures; EXPRESSED DURING: 9 growth stages; CONTAINS InterPro DOMAIN/s: ATPase, AAA-type, core (InterPro:IPR003959), ATPase, AAA+ type, core (InterPro:IPR003593), SMAD/FHA dom…	AAA+ ATPase domain | ATPase, AAA-type, conserved site | ATPase, AAA-type, core | Forkhead-associated (FHA) domain | P-loop containing nucleoside triphosphate hydrolase | SMAD/FHA domain	NO
AT1G62540	22	1:23154535-23154588	+	AD	0.66726	0.87123	-0.20398	0.999	K2	1.5583	flavin-monooxygenase glucosinolate S-oxygenase 2	flavin-monooxygenase glucosinolate S-oxygenase 2 (FMO GS-OX2); CONTAINS InterPro DOMAIN/s: Flavin-containing monooxygenase FMO (InterPro:IPR000960), Flavin-containing monooxygenase-like (InterPro:IPR020946); BEST Arabidopsis thaliana protein match is: flavin-monooxygenase glucosinolate S-oxygenase 1 (TAIR:AT1G65860.1)	Flavin monooxygenase FMO | Flavin monooxygenase-like	NO
AT1G62540	13	1:23153800-23153887	+	CE	0.4909	0.30422	0.18669	0.966	K4	2.4512	flavin-monooxygenase glucosinolate S-oxygenase 2	flavin-monooxygenase glucosinolate S-oxygenase 2 (FMO GS-OX2); CONTAINS InterPro DOMAIN/s: Flavin-containing monooxygenase FMO (InterPro:IPR000960), Flavin-containing monooxygenase-like (InterPro:IPR020946); BEST Arabidopsis thaliana protein match is: flavin-monooxygenase glucosinolate S-oxygenase 1 (TAIR:AT1G65860.1)	Flavin monooxygenase FMO | Flavin monooxygenase-like	NO
AT1G62540	14	1:23153888-23153987	+	RI	0.40295	0.25406	0.14889	0.936	K4	2.4389	flavin-monooxygenase glucosinolate S-oxygenase 2	flavin-monooxygenase glucosinolate S-oxygenase 2 (FMO GS-OX2); CONTAINS InterPro DOMAIN/s: Flavin-containing monooxygenase FMO (InterPro:IPR000960), Flavin-containing monooxygenase-like (InterPro:IPR020946); BEST Arabidopsis thaliana protein match is: flavin-monooxygenase glucosinolate S-oxygenase 1 (TAIR:AT1G65860.1)	Flavin monooxygenase FMO | Flavin monooxygenase-like	NO
AT1G62540	16	1:23154144-23154269	+	RI	0.08826	0.201	-0.11274	0.942	K2	0.9296	flavin-monooxygenase glucosinolate S-oxygenase 2	flavin-monooxygenase glucosinolate S-oxygenase 2 (FMO GS-OX2); CONTAINS InterPro DOMAIN/s: Flavin-containing monooxygenase FMO (InterPro:IPR000960), Flavin-containing monooxygenase-like (InterPro:IPR020946); BEST Arabidopsis thaliana protein match is: flavin-monooxygenase glucosinolate S-oxygenase 1 (TAIR:AT1G65860.1)	Flavin monooxygenase FMO | Flavin monooxygenase-like	NO
AT1G62560	11	1:23161902-23161942	+	AD	0.65889	0.93491	-0.27602	0.938	K2	1.5587	flavin-monooxygenase glucosinolate S-oxygenase 3	flavin-monooxygenase glucosinolate S-oxygenase 3 (FMO GS-OX3); CONTAINS InterPro DOMAIN/s: Flavin-containing monooxygenase FMO (InterPro:IPR000960), Flavin-containing monooxygenase-like (InterPro:IPR020946); BEST Arabidopsis thaliana protein match is: flavin-monooxygenase glucosinolate S-oxygenase 2 (TAIR:AT1G62540.1)	Flavin monooxygenase FMO | Flavin monooxygenase-like	NO
AT1G62600	5	1:23180253-23180329	+	RI	0.3293	0.17058	0.15872	0.973	K4	2.1556	Flavin-binding monooxygenase family protein	Flavin-binding monooxygenase family protein; FUNCTIONS IN: NADP or NADPH binding, monooxygenase activity, FAD binding, flavin-containing monooxygenase activity; INVOLVED IN: oxidation reduction; LOCATED IN: vacuole; CONTAINS InterPro DOMAIN/s: Flavin-containing monooxygenase FMO (InterPro:IPR000960), Flavin-containing monooxygenase-like (InterPro:IPR020946); BEST Arabidopsis thaliana protein matc…	Flavin monooxygenase FMO | Flavin monooxygenase-like	NO
AT1G63260	35	1:23467041-23467122	-	RI	0.27181	0.58776	-0.31595	0.989	K3	1.8981	tetraspanin10	tetraspanin10 (TET10); INVOLVED IN: aging; LOCATED IN: endomembrane system, integral to membrane; EXPRESSED IN: 22 plant structures; EXPRESSED DURING: 13 growth stages; CONTAINS InterPro DOMAIN/s: Tetraspanin (InterPro:IPR018499), Tetraspanin, subgroup (InterPro:IPR000301); BEST Arabidopsis thaliana protein match is: tetraspanin3 (TAIR:AT3G45600.1); BEST Arabidopsis thaliana protein match is: tet…	Tetraspanin | Tetraspanin/Peripherin	NO
AT1G63260	15	1:23468247-23468339	-	RI	0.24357	0.056229	0.18734	0.971	K1	0.9183	tetraspanin10	tetraspanin10 (TET10); INVOLVED IN: aging; LOCATED IN: endomembrane system, integral to membrane; EXPRESSED IN: 22 plant structures; EXPRESSED DURING: 13 growth stages; CONTAINS InterPro DOMAIN/s: Tetraspanin (InterPro:IPR018499), Tetraspanin, subgroup (InterPro:IPR000301); BEST Arabidopsis thaliana protein match is: tetraspanin3 (TAIR:AT3G45600.1); BEST Arabidopsis thaliana protein match is: tet…	Tetraspanin | Tetraspanin/Peripherin	NO
AT1G63880	17	1:23713236-23713332	-	EI/RI	0.80817	0.91392	-0.10575	0.918	K4	1.4895	Disease resistance protein (TIR-NBS-LRR class) family	Disease resistance protein (TIR-NBS-LRR class) family; FUNCTIONS IN: transmembrane receptor activity, nucleoside-triphosphatase activity, nucleotide binding, ATP binding; INVOLVED IN: defense response to fungus, defense response; LOCATED IN: intrinsic to membrane; EXPRESSED IN: 21 plant structures; EXPRESSED DURING: 13 growth stages; CONTAINS InterPro DOMAIN/s: ATPase, AAA+ type, core (InterPro:I…	AAA+ ATPase domain | Leucine-rich repeat | Leucine-rich repeat 3 | NB-ARC | P-loop containing nucleoside triphosphate hydrolase | Toll/interleukin-1 receptor homology (TIR) domain	NO
AT1G63880	17	1:23713236-23713332	-	RI	0.80817	0.91392	-0.10575	0.918	K4	1.4895	Disease resistance protein (TIR-NBS-LRR class) family	Disease resistance protein (TIR-NBS-LRR class) family; FUNCTIONS IN: transmembrane receptor activity, nucleoside-triphosphatase activity, nucleotide binding, ATP binding; INVOLVED IN: defense response to fungus, defense response; LOCATED IN: intrinsic to membrane; EXPRESSED IN: 21 plant structures; EXPRESSED DURING: 13 growth stages; CONTAINS InterPro DOMAIN/s: ATPase, AAA+ type, core (InterPro:I…	AAA+ ATPase domain | Leucine-rich repeat | Leucine-rich repeat 3 | NB-ARC | P-loop containing nucleoside triphosphate hydrolase | Toll/interleukin-1 receptor homology (TIR) domain	NO
AT1G63880	15	1:23713690-23713790	-	RI	0.45791	0.35461	0.1033	0.931	K3	1.4362	Disease resistance protein (TIR-NBS-LRR class) family	Disease resistance protein (TIR-NBS-LRR class) family; FUNCTIONS IN: transmembrane receptor activity, nucleoside-triphosphatase activity, nucleotide binding, ATP binding; INVOLVED IN: defense response to fungus, defense response; LOCATED IN: intrinsic to membrane; EXPRESSED IN: 21 plant structures; EXPRESSED DURING: 13 growth stages; CONTAINS InterPro DOMAIN/s: ATPase, AAA+ type, core (InterPro:I…	AAA+ ATPase domain | Leucine-rich repeat | Leucine-rich repeat 3 | NB-ARC | P-loop containing nucleoside triphosphate hydrolase | Toll/interleukin-1 receptor homology (TIR) domain	NO
AT1G64150	8	1:23811764-23811774	-	AD	0.57136	0.72975	-0.15839	0.965	K1	0.9991	Uncharacterized protein family (UPF0016)	Uncharacterized protein family (UPF0016); LOCATED IN: chloroplast, membrane; EXPRESSED IN: 22 plant structures; EXPRESSED DURING: 13 growth stages; CONTAINS InterPro DOMAIN/s: Uncharacterised protein family UPF0016 (InterPro:IPR001727); BEST Arabidopsis thaliana protein match is: Uncharacterized protein family (UPF0016) (TAIR:AT4G13590.1)	Uncharacterised protein family UPF0016	NO
AT1G64150	18	1:23811199-23811276	-	RI	0.21791	0.076325	0.14159	1	K1	0.7914	Uncharacterized protein family (UPF0016)	Uncharacterized protein family (UPF0016); LOCATED IN: chloroplast, membrane; EXPRESSED IN: 22 plant structures; EXPRESSED DURING: 13 growth stages; CONTAINS InterPro DOMAIN/s: Uncharacterised protein family UPF0016 (InterPro:IPR001727); BEST Arabidopsis thaliana protein match is: Uncharacterized protein family (UPF0016) (TAIR:AT4G13590.1)	Uncharacterised protein family UPF0016	NO
AT1G64355	6	1:23886655-23886672	+	CE	0.85853	0.99048	-0.13195	1	K3	2.0228		unknown protein; FUNCTIONS IN: molecular_function unknown; INVOLVED IN: biological_process unknown; LOCATED IN: chloroplast; EXPRESSED IN: 23 plant structures; EXPRESSED DURING: 13 growth stages; CONTAINS InterPro DOMAIN/s: Protein of unknown function DUF3593 (InterPro:IPR021995)	Protein of unknown function DUF3593	NO
AT1G64430	6	1:23934691-23934712	+	AA	0.59866	0.4545	0.14415	0.995	K2	1.0458	Pentatricopeptide repeat (PPR) superfamily protein	Pentatricopeptide repeat (PPR) superfamily protein; CONTAINS InterPro DOMAIN/s: Pentatricopeptide repeat (InterPro:IPR002885)	Pentatricopeptide repeat	NO
AT1G64770	7	1:24058589-24058655	+	CE	0.4448	0.098546	0.34626	0.984	K1	0.9988	NDH-dependent cyclic electron flow 1	NDH-dependent cyclic electron flow 1 (NDF2); BEST Arabidopsis thaliana protein match is: NDH-dependent cyclic electron flow 5 (TAIR:AT1G55370.2); FUNCTIONS IN: carbohydrate binding, catalytic activity; INVOLVED IN: photosynthetic electron transport in photosystem I; LOCATED IN: chloroplast thylakoid membrane, chloroplast, NAD(P)H dehydrogenase complex (plastoquinone); EXPRESSED IN: 21 plant struc…	Galactose mutarotase-like domain | Glycoside hydrolase-type carbohydrate-binding, subgroup	NO
AT1G64770	10	1:24058473-24058588	+	RI	0.44523	0.13267	0.31256	0.995	K1	0.9988	NDH-dependent cyclic electron flow 1	NDH-dependent cyclic electron flow 1 (NDF2); BEST Arabidopsis thaliana protein match is: NDH-dependent cyclic electron flow 5 (TAIR:AT1G55370.2); FUNCTIONS IN: carbohydrate binding, catalytic activity; INVOLVED IN: photosynthetic electron transport in photosystem I; LOCATED IN: chloroplast thylakoid membrane, chloroplast, NAD(P)H dehydrogenase complex (plastoquinone); EXPRESSED IN: 21 plant struc…	Galactose mutarotase-like domain | Glycoside hydrolase-type carbohydrate-binding, subgroup	NO
AT1G65900	7	1:24518013-24518023	-	AA	0.9183	0.72625	0.19204	0.917	K1	0.9544		unknown protein; FUNCTIONS IN: molecular_function unknown; INVOLVED IN: biological_process unknown; LOCATED IN: endomembrane system; EXPRESSED IN: 21 plant structures; EXPRESSED DURING: 13 growth stages		NO
AT1G66730	4	1:24887644-24887663	+	AA	0.46536	0.76135	-0.29598	0.992	K2	1.913	DNA LIGASE 6	DNA LIGASE 6 (LIG6); FUNCTIONS IN: DNA binding, DNA ligase (ATP) activity, ATP binding; INVOLVED IN: DNA repair, seed germination, DNA recombination, DNA replication; LOCATED IN: chloroplast; EXPRESSED IN: 16 plant structures; EXPRESSED DURING: 9 growth stages; CONTAINS InterPro DOMAIN/s: Nucleic acid-binding, OB-fold (InterPro:IPR012340), DNA ligase, N-terminal (InterPro:IPR012308), DNA repair m…	Beta-lactamase-like | DNA ligase, ATP-dependent | DNA ligase, ATP-dependent, C-terminal | DNA ligase, ATP-dependent, N-terminal | DNA ligase, ATP-dependent, central | DNA ligase, ATP-dependent, conserved site | DNA repair metallo-beta-lactamase | Nucleic acid-binding, OB-fold	NO
AT1G66730	5	1:24887664-24887666	+	AA	0.59625	0.80622	-0.20998	0.95	K2	1.913	DNA LIGASE 6	DNA LIGASE 6 (LIG6); FUNCTIONS IN: DNA binding, DNA ligase (ATP) activity, ATP binding; INVOLVED IN: DNA repair, seed germination, DNA recombination, DNA replication; LOCATED IN: chloroplast; EXPRESSED IN: 16 plant structures; EXPRESSED DURING: 9 growth stages; CONTAINS InterPro DOMAIN/s: Nucleic acid-binding, OB-fold (InterPro:IPR012340), DNA ligase, N-terminal (InterPro:IPR012308), DNA repair m…	Beta-lactamase-like | DNA ligase, ATP-dependent | DNA ligase, ATP-dependent, C-terminal | DNA ligase, ATP-dependent, N-terminal | DNA ligase, ATP-dependent, central | DNA ligase, ATP-dependent, conserved site | DNA repair metallo-beta-lactamase | Nucleic acid-binding, OB-fold	NO
AT1G66730	6	1:24887667-24887725	+	CE	0.77606	0.9322	-0.15614	0.937	K2	1.913	DNA LIGASE 6	DNA LIGASE 6 (LIG6); FUNCTIONS IN: DNA binding, DNA ligase (ATP) activity, ATP binding; INVOLVED IN: DNA repair, seed germination, DNA recombination, DNA replication; LOCATED IN: chloroplast; EXPRESSED IN: 16 plant structures; EXPRESSED DURING: 9 growth stages; CONTAINS InterPro DOMAIN/s: Nucleic acid-binding, OB-fold (InterPro:IPR012340), DNA ligase, N-terminal (InterPro:IPR012308), DNA repair m…	Beta-lactamase-like | DNA ligase, ATP-dependent | DNA ligase, ATP-dependent, C-terminal | DNA ligase, ATP-dependent, N-terminal | DNA ligase, ATP-dependent, central | DNA ligase, ATP-dependent, conserved site | DNA repair metallo-beta-lactamase | Nucleic acid-binding, OB-fold	NO
AT1G66840	2	1:24936141-24936218	-	RI	0.40827	0.22967	0.1786	0.947	K2	1.5222	Plant protein of unknown function (DUF827)	Plant protein of unknown function (DUF827); CONTAINS InterPro DOMAIN/s: Protein of unknown function DUF827, plant (InterPro:IPR008545); BEST Arabidopsis thaliana protein match is: Plant protein of unknown function (DUF827) (TAIR:AT5G38150.1)	WEB family	NO
AT1G66920	8	1:24966162-24966239	-	EI/RI	0.87089	0.65109	0.2198	0.928	K1	0.9685	Protein kinase superfamily protein	Protein kinase superfamily protein; FUNCTIONS IN: protein serine/threonine kinase activity, protein kinase activity, kinase activity, ATP binding; INVOLVED IN: protein amino acid phosphorylation; LOCATED IN: endomembrane system; CONTAINS InterPro DOMAIN/s: Protein kinase, ATP binding site (InterPro:IPR017441), Protein kinase, catalytic domain (InterPro:IPR000719), Serine-threonine/tyrosine-protei…	Concanavalin A-like lectin/glucanase, subgroup | Protein kinase domain | Protein kinase, ATP binding site | Protein kinase-like domain | Serine-threonine/tyrosine-protein kinase catalytic domain | Serine/threonine-protein kinase, active site	NO
AT1G66920	8	1:24966162-24966239	-	RI	0.87089	0.65109	0.2198	0.928	K1	0.9685	Protein kinase superfamily protein	Protein kinase superfamily protein; FUNCTIONS IN: protein serine/threonine kinase activity, protein kinase activity, kinase activity, ATP binding; INVOLVED IN: protein amino acid phosphorylation; LOCATED IN: endomembrane system; CONTAINS InterPro DOMAIN/s: Protein kinase, ATP binding site (InterPro:IPR017441), Protein kinase, catalytic domain (InterPro:IPR000719), Serine-threonine/tyrosine-protei…	Concanavalin A-like lectin/glucanase, subgroup | Protein kinase domain | Protein kinase, ATP binding site | Protein kinase-like domain | Serine-threonine/tyrosine-protein kinase catalytic domain | Serine/threonine-protein kinase, active site	NO
AT1G67060	6	1:25037149-25037198	+	AD	0.30206	0.13605	0.166	0.996	K3	1.8279		unknown protein; FUNCTIONS IN: molecular_function unknown; INVOLVED IN: biological_process unknown; LOCATED IN: plasma membrane; EXPRESSED IN: 22 plant structures; EXPRESSED DURING: 13 growth stages		NO
AT1G67140	45	1:25106985-25106994	-	AA	0.93963	0.77291	0.16673	0.938	K1	0.8767	HEAT repeat-containing protein	SWEETIE (SWEETIE); FUNCTIONS IN: binding; INVOLVED IN: trehalose metabolic process, carbohydrate metabolic process, starch metabolic process; LOCATED IN: cytosol; EXPRESSED IN: 25 plant structures; EXPRESSED DURING: 13 growth stages; CONTAINS InterPro DOMAIN/s: Armadillo-type fold (InterPro:IPR016024)	Armadillo-like helical | Armadillo-type fold	NO
AT1G67140	29	1:25110254-25110258	-	AA	0.94297	0.81933	0.12364	0.923	K1	0.7468	HEAT repeat-containing protein	SWEETIE (SWEETIE); FUNCTIONS IN: binding; INVOLVED IN: trehalose metabolic process, carbohydrate metabolic process, starch metabolic process; LOCATED IN: cytosol; EXPRESSED IN: 25 plant structures; EXPRESSED DURING: 13 growth stages; CONTAINS InterPro DOMAIN/s: Armadillo-type fold (InterPro:IPR016024)	Armadillo-like helical | Armadillo-type fold	NO
AT1G67140	92	1:25104466-25104758	-	RI	0.26205	0.094267	0.16779	0.96	K1	0.9183	HEAT repeat-containing protein	SWEETIE (SWEETIE); FUNCTIONS IN: binding; INVOLVED IN: trehalose metabolic process, carbohydrate metabolic process, starch metabolic process; LOCATED IN: cytosol; EXPRESSED IN: 25 plant structures; EXPRESSED DURING: 13 growth stages; CONTAINS InterPro DOMAIN/s: Armadillo-type fold (InterPro:IPR016024)	Armadillo-like helical | Armadillo-type fold	NO
AT1G67195	4	1:25137844-25137893	-	AD	0.44466	0.3081	0.13656	0.984	K2	1.4242	MIR414 (MICRORNA 414)	MICRORNA 414 (MIR414); FUNCTIONS IN: molecular_function unknown; INVOLVED IN: biological_process unknown; LOCATED IN: cellular_component unknown		NO
AT1G67300	25	1:25194779-25194892	-	RI	0.27022	0.44146	-0.17124	0.98	K2	1.7891	Major facilitator superfamily protein	Major facilitator superfamily protein; FUNCTIONS IN: carbohydrate transmembrane transporter activity, sugar:hydrogen symporter activity; INVOLVED IN: transport, transmembrane transport; LOCATED IN: integral to membrane, membrane; EXPRESSED IN: 22 plant structures; EXPRESSED DURING: 13 growth stages; CONTAINS InterPro DOMAIN/s: Sugar transporter, conserved site (InterPro:IPR005829), Major facilita…	General substrate transporter | Major facilitator superfamily domain | Major facilitator superfamily domain, general substrate transporter | Sugar transporter, conserved site | Sugar/inositol transporter	NO
AT1G67300	7	1:25196798-25196934	-	RI	0.27707	0.12951	0.14756	0.979	K1	0.9219	Major facilitator superfamily protein	Major facilitator superfamily protein; FUNCTIONS IN: carbohydrate transmembrane transporter activity, sugar:hydrogen symporter activity; INVOLVED IN: transport, transmembrane transport; LOCATED IN: integral to membrane, membrane; EXPRESSED IN: 22 plant structures; EXPRESSED DURING: 13 growth stages; CONTAINS InterPro DOMAIN/s: Sugar transporter, conserved site (InterPro:IPR005829), Major facilita…	General substrate transporter | Major facilitator superfamily domain | Major facilitator superfamily domain, general substrate transporter | Sugar transporter, conserved site | Sugar/inositol transporter	NO
AT1G67790	14	1:25418001-25418097	-	RI	0.37876	0.096919	0.28184	0.936	K1	0.9456		unknown protein; BEST Arabidopsis thaliana protein match is: unknown protein (TAIR:AT3G01680.1)	Sieve element occlusion, C-terminal | Sieve element occlusion, N-terminal	NO
AT1G67880	7	1:25455182-25455381	-	RI	0.16316	0.39022	-0.22706	0.901	K2	1.2171	beta-1,4-N-acetylglucosaminyltransferase family protein	beta-1,4-N-acetylglucosaminyltransferase family protein; FUNCTIONS IN: transferase activity, transferring glycosyl groups, acetylglucosaminyltransferase activity; INVOLVED IN: protein amino acid N-linked glycosylation; LOCATED IN: membrane; EXPRESSED IN: 22 plant structures; EXPRESSED DURING: 13 growth stages; CONTAINS InterPro DOMAIN/s: Glycosyl transferase, family 17 (InterPro:IPR006813); BEST …	Glycosyl transferase, family 17	NO
AT1G67900	8	1:25467052-25467159	+	CE	0.5894	0.29406	0.29534	1	K3	1.6704	Phototropic-responsive NPH3 family protein	Phototropic-responsive NPH3 family protein; FUNCTIONS IN: signal transducer activity; INVOLVED IN: response to light stimulus; LOCATED IN: cellular_component unknown; CONTAINS InterPro DOMAIN/s: NPH3 (InterPro:IPR004249), BTB/POZ fold (InterPro:IPR011333); EXPRESSED IN: cultured cell; BEST Arabidopsis thaliana protein match is: Phototropic-responsive NPH3 family protein (TAIR:AT3G26490.1)	BTB/POZ fold | NPH3 domain	NO
AT1G67900	10	1:25467376-25467421	+	CE	0.18128	0.039903	0.14137	0.925	K3	1.5576	Phototropic-responsive NPH3 family protein	Phototropic-responsive NPH3 family protein; FUNCTIONS IN: signal transducer activity; INVOLVED IN: response to light stimulus; LOCATED IN: cellular_component unknown; CONTAINS InterPro DOMAIN/s: NPH3 (InterPro:IPR004249), BTB/POZ fold (InterPro:IPR011333); EXPRESSED IN: cultured cell; BEST Arabidopsis thaliana protein match is: Phototropic-responsive NPH3 family protein (TAIR:AT3G26490.1)	BTB/POZ fold | NPH3 domain	NO
AT1G68190	15	1:25559885-25559942	+	CE	0.32091	0.17794	0.14298	1	K3	1.4258	B-box zinc finger family protein	B-box zinc finger family protein; FUNCTIONS IN: sequence-specific DNA binding transcription factor activity, zinc ion binding; INVOLVED IN: regulation of transcription; LOCATED IN: endomembrane system, intracellular; EXPRESSED IN: 14 plant structures; EXPRESSED DURING: 8 growth stages; CONTAINS InterPro DOMAIN/s: Zinc finger, B-box (InterPro:IPR000315); BEST Arabidopsis thaliana protein match is:…	Zinc finger, B-box	NO
AT1G68190	7	1:25559292-25559368	+	RI	0.26471	0.12235	0.14236	0.993	K3	1.2872	B-box zinc finger family protein	B-box zinc finger family protein; FUNCTIONS IN: sequence-specific DNA binding transcription factor activity, zinc ion binding; INVOLVED IN: regulation of transcription; LOCATED IN: endomembrane system, intracellular; EXPRESSED IN: 14 plant structures; EXPRESSED DURING: 8 growth stages; CONTAINS InterPro DOMAIN/s: Zinc finger, B-box (InterPro:IPR000315); BEST Arabidopsis thaliana protein match is:…	Zinc finger, B-box	NO
AT1G68190	18	1:25559792-25559884	+	RI	0.29364	0.16024	0.1334	1	K3	1.4304	B-box zinc finger family protein	B-box zinc finger family protein; FUNCTIONS IN: sequence-specific DNA binding transcription factor activity, zinc ion binding; INVOLVED IN: regulation of transcription; LOCATED IN: endomembrane system, intracellular; EXPRESSED IN: 14 plant structures; EXPRESSED DURING: 8 growth stages; CONTAINS InterPro DOMAIN/s: Zinc finger, B-box (InterPro:IPR000315); BEST Arabidopsis thaliana protein match is:…	Zinc finger, B-box	NO
AT1G68890	15	1:25899959-25899971	+	AA	0.64849	0.37803	0.27046	0.955	K6	3.8586	magnesium ion binding;thiamin pyrophosphate binding;hydro-lyases;catalytics;2-succinyl-5-enolpyruvyl-6-hydroxy-3-cyclohexene-1-carboxylic-acid synthases	magnesium ion binding;thiamin pyrophosphate binding;hydro-lyases;catalytics;2-succinyl-5-enolpyruvyl-6-hydroxy-3-cyclohexene-1-carboxylic-acid synthases; FUNCTIONS IN: 2-succinyl-5-enolpyruvyl-6-hydroxy-3-cyclohexene-1-carboxylic-acid synthase activity, hydro-lyase activity, magnesium ion binding, thiamin pyrophosphate binding, catalytic activity; INVOLVED IN: phylloquinone biosynthetic process, …	Alpha/Beta hydrolase fold | DHS-like NAD/FAD-binding domain | Enolase C-terminal domain-like | Enolase N-terminal domain-like | Mandelate racemase/muconate lactonizing enzyme, C-terminal | Mandelate racemase/muconate lactonizing enzyme, conserved site | Menaquinone biosynthesis protein MenD | O-succinylbenzoic acid (OSB) synthetase | Thiamin diphosphate-binding fold | Thiamine pyrophosphate enzym…	NO
AT1G68890	12	1:25898143-25898724	+	RI	0.25757	0.03058	0.22699	0.995	K1	0.8905	magnesium ion binding;thiamin pyrophosphate binding;hydro-lyases;catalytics;2-succinyl-5-enolpyruvyl-6-hydroxy-3-cyclohexene-1-carboxylic-acid synthases	magnesium ion binding;thiamin pyrophosphate binding;hydro-lyases;catalytics;2-succinyl-5-enolpyruvyl-6-hydroxy-3-cyclohexene-1-carboxylic-acid synthases; FUNCTIONS IN: 2-succinyl-5-enolpyruvyl-6-hydroxy-3-cyclohexene-1-carboxylic-acid synthase activity, hydro-lyase activity, magnesium ion binding, thiamin pyrophosphate binding, catalytic activity; INVOLVED IN: phylloquinone biosynthetic process, …	Alpha/Beta hydrolase fold | DHS-like NAD/FAD-binding domain | Enolase C-terminal domain-like | Enolase N-terminal domain-like | Mandelate racemase/muconate lactonizing enzyme, C-terminal | Mandelate racemase/muconate lactonizing enzyme, conserved site | Menaquinone biosynthesis protein MenD | O-succinylbenzoic acid (OSB) synthetase | Thiamin diphosphate-binding fold | Thiamine pyrophosphate enzym…	NO
AT1G69010	7	1:25943425-25943429	+	AD	0.69218	0.84785	-0.15567	0.986	K1	0.9397	BES1-interacting Myc-like protein 2	BES1-interacting Myc-like protein 2 (BIM2); FUNCTIONS IN: DNA binding, sequence-specific DNA binding transcription factor activity; INVOLVED IN: dTDP-rhamnose biosynthetic process, regulation of transcription; LOCATED IN: nucleus; EXPRESSED IN: 22 plant structures; EXPRESSED DURING: 13 growth stages; CONTAINS InterPro DOMAIN/s: Helix-loop-helix DNA-binding domain (InterPro:IPR001092), Helix-loop-…	Myc-type, basic helix-loop-helix (bHLH) domain	NO
AT1G69170	7	1:26006375-26006469	+	RI	0.19366	0.40667	-0.21301	0.941	K1	0.9963	Squamosa promoter-binding protein-like (SBP domain) transcription factor family protein	Squamosa promoter-binding protein-like (SBP domain) transcription factor family protein; FUNCTIONS IN: DNA binding, sequence-specific DNA binding transcription factor activity; INVOLVED IN: regulation of transcription; LOCATED IN: nucleus; EXPRESSED IN: 14 plant structures; EXPRESSED DURING: 6 growth stages; CONTAINS InterPro DOMAIN/s: Transcription factor, SBP-box (InterPro:IPR004333); BEST Arab…	Transcription factor, SBP-box	NO
AT1G69370	4	1:26080725-26080732	+	AA	0.95584	0.84809	0.10775	0.92	K1	0.6395	chorismate mutase 3	chorismate mutase 3 (CM3); CONTAINS InterPro DOMAIN/s: Chorismate mutase, type II (InterPro:IPR020822), Chorismate mutase, AroQ class, eukaryotic type (InterPro:IPR008238); BEST Arabidopsis thaliana protein match is: chorismate mutase 1 (TAIR:AT3G29200.1)	Chorismate mutase, AroQ class, eukaryotic type | Chorismate mutase, type II	NO
AT1G69450	33	1:26107619-26107699	-	EI/RI	0.23028	0.45132	-0.22104	0.997	K2	1.0186	Early-responsive to dehydration stress protein (ERD4)	Early-responsive to dehydration stress protein (ERD4); LOCATED IN: endomembrane system, membrane; EXPRESSED IN: 23 plant structures; EXPRESSED DURING: 13 growth stages; CONTAINS InterPro DOMAIN/s: Protein of unknown function DUF221 (InterPro:IPR003864); BEST Arabidopsis thaliana protein match is: hypothetical protein 1 (TAIR:AT3G01100.1)	Domain of unknown function DUF221	NO
AT1G69450	33	1:26107619-26107699	-	RI	0.23028	0.45132	-0.22104	0.997	K2	1.0186	Early-responsive to dehydration stress protein (ERD4)	Early-responsive to dehydration stress protein (ERD4); LOCATED IN: endomembrane system, membrane; EXPRESSED IN: 23 plant structures; EXPRESSED DURING: 13 growth stages; CONTAINS InterPro DOMAIN/s: Protein of unknown function DUF221 (InterPro:IPR003864); BEST Arabidopsis thaliana protein match is: hypothetical protein 1 (TAIR:AT3G01100.1)	Domain of unknown function DUF221	NO
AT1G69450	16	1:26109494-26109572	-	RI	0.36022	0.091991	0.26823	0.971	K3	1.4776	Early-responsive to dehydration stress protein (ERD4)	Early-responsive to dehydration stress protein (ERD4); LOCATED IN: endomembrane system, membrane; EXPRESSED IN: 23 plant structures; EXPRESSED DURING: 13 growth stages; CONTAINS InterPro DOMAIN/s: Protein of unknown function DUF221 (InterPro:IPR003864); BEST Arabidopsis thaliana protein match is: hypothetical protein 1 (TAIR:AT3G01100.1)	Domain of unknown function DUF221	NO
AT1G69523	3	1:26130331-26130337	+	AA	0.70859	0.87635	-0.16776	0.942	K1	0.9636	S-adenosyl-L-methionine-dependent methyltransferases superfamily protein	S-adenosyl-L-methionine-dependent methyltransferases superfamily protein; FUNCTIONS IN: methyltransferase activity; INVOLVED IN: metabolic process; LOCATED IN: chloroplast; EXPRESSED IN: 20 plant structures; EXPRESSED DURING: 13 growth stages; CONTAINS InterPro DOMAIN/s: Methyltransferase type 11 (InterPro:IPR013216); BEST Arabidopsis thaliana protein match is: S-adenosyl-L-methionine-dependent m…	Methyltransferase type 11 | S-adenosyl-L-methionine-dependent methyltransferase-like	NO
AT1G69935	7	1:26342827-26342834	-	AA	0.79338	0.59487	0.19851	0.997	K2	1.5564	short hypocotyl in white light1	SHORT HYPOCOTYL IN WHITE LIGHT1 (SHW1); BEST Arabidopsis thaliana protein match is: unknown protein (TAIR:AT4G33780.1)		NO
AT1G69935	6	1:26342835-26342914	-	RI	0.48792	0.28058	0.20734	0.997	K2	1.5549	short hypocotyl in white light1	SHORT HYPOCOTYL IN WHITE LIGHT1 (SHW1); BEST Arabidopsis thaliana protein match is: unknown protein (TAIR:AT4G33780.1)		NO
AT1G70505	14	1:26571747-26571812	+	CE	0.82232	0.95542	-0.1331	0.96	K3	1.5544		unknown protein; BEST Arabidopsis thaliana protein match is: unknown protein (TAIR:AT1G10660.1)		NO
AT1G70620	12	1:26627842-26627844	+	AA	0.83039	0.95767	-0.12728	0.974	K2	1.4857	cyclin-related	cyclin-related; FUNCTIONS IN: molecular_function unknown; INVOLVED IN: biological_process unknown; LOCATED IN: cellular_component unknown; EXPRESSED IN: 23 plant structures; EXPRESSED IN: 24 plant structures; EXPRESSED DURING: 13 growth stages		NO
AT1G70620	19	1:26629002-26629052	+	AA	0.45566	0.58686	-0.1312	0.931	K2	1.2929	cyclin-related	cyclin-related; FUNCTIONS IN: molecular_function unknown; INVOLVED IN: biological_process unknown; LOCATED IN: cellular_component unknown; EXPRESSED IN: 23 plant structures; EXPRESSED IN: 24 plant structures; EXPRESSED DURING: 13 growth stages		NO
AT1G70620	12	1:26627541-26627774	+	RI	0.68488	0.90785	-0.22298	0.978	K2	1.4836	cyclin-related	cyclin-related; FUNCTIONS IN: molecular_function unknown; INVOLVED IN: biological_process unknown; LOCATED IN: cellular_component unknown; EXPRESSED IN: 23 plant structures; EXPRESSED IN: 24 plant structures; EXPRESSED DURING: 13 growth stages		NO
AT1G71070	8	1:26807955-26808044	-	RI	0.11658	0.23568	-0.1191	0.919	K1	0.8642	Core-2/I-branching beta-1,6-N-acetylglucosaminyltransferase family protein	Core-2/I-branching beta-1,6-N-acetylglucosaminyltransferase family protein; FUNCTIONS IN: transferase activity, transferring glycosyl groups, acetylglucosaminyltransferase activity; INVOLVED IN: carbohydrate biosynthetic process; LOCATED IN: endomembrane system, membrane; EXPRESSED IN: 22 plant structures; EXPRESSED DURING: 13 growth stages; CONTAINS InterPro DOMAIN/s: Glycosyl transferase, famil…	Glycosyl transferase, family 14	NO
AT1G71310	4	1:26878853-26878860	-	AA	0.7919	0.92348	-0.13158	0.981	K1	0.7871	cobalt ion binding	cobalt ion binding; BEST Arabidopsis thaliana protein match is: unknown protein (TAIR:AT5G47870.1)		NO
AT1G71720	7	1:26984574-26984577	+	AD	0.54578	0.67028	-0.1245	0.955	K1	1	Nucleic acid-binding proteins superfamily	Nucleic acid-binding proteins superfamily; FUNCTIONS IN: RNA binding; LOCATED IN: chloroplast; EXPRESSED IN: 22 plant structures; EXPRESSED DURING: 13 growth stages; CONTAINS InterPro DOMAIN/s: Nucleic acid-binding, OB-fold-like (InterPro:IPR016027), Nucleic acid-binding, OB-fold (InterPro:IPR012340), Ribosomal protein S1, RNA-binding domain (InterPro:IPR003029); BEST Arabidopsis thaliana protein…	Nucleic acid-binding, OB-fold | RNA-binding domain, S1 | Ribosomal protein S1, RNA-binding domain	NO
AT1G71720	11	1:26984916-26984920	+	AD	0.43486	0.29191	0.14295	0.97	K2	1.3599	Nucleic acid-binding proteins superfamily	Nucleic acid-binding proteins superfamily; FUNCTIONS IN: RNA binding; LOCATED IN: chloroplast; EXPRESSED IN: 22 plant structures; EXPRESSED DURING: 13 growth stages; CONTAINS InterPro DOMAIN/s: Nucleic acid-binding, OB-fold-like (InterPro:IPR016027), Nucleic acid-binding, OB-fold (InterPro:IPR012340), Ribosomal protein S1, RNA-binding domain (InterPro:IPR003029); BEST Arabidopsis thaliana protein…	Nucleic acid-binding, OB-fold | RNA-binding domain, S1 | Ribosomal protein S1, RNA-binding domain	NO
AT1G71720	12	1:26984921-26984941	+	AD	0.37443	0.25401	0.12042	0.982	K2	1.3599	Nucleic acid-binding proteins superfamily	Nucleic acid-binding proteins superfamily; FUNCTIONS IN: RNA binding; LOCATED IN: chloroplast; EXPRESSED IN: 22 plant structures; EXPRESSED DURING: 13 growth stages; CONTAINS InterPro DOMAIN/s: Nucleic acid-binding, OB-fold-like (InterPro:IPR016027), Nucleic acid-binding, OB-fold (InterPro:IPR012340), Ribosomal protein S1, RNA-binding domain (InterPro:IPR003029); BEST Arabidopsis thaliana protein…	Nucleic acid-binding, OB-fold | RNA-binding domain, S1 | Ribosomal protein S1, RNA-binding domain	NO
AT1G72190	9	1:27168524-27168531	-	AD	0.80287	0.90619	-0.10332	0.952	K1	0.7524	D-isomer specific 2-hydroxyacid dehydrogenase family protein	D-isomer specific 2-hydroxyacid dehydrogenase family protein; FUNCTIONS IN: in 6 functions; INVOLVED IN: homoserine biosynthetic process, metabolic process; EXPRESSED IN: 22 plant structures; EXPRESSED DURING: 13 growth stages; CONTAINS InterPro DOMAIN/s: D-isomer specific 2-hydroxyacid dehydrogenase, catalytic domain (InterPro:IPR006139), D-isomer specific 2-hydroxyacid dehydrogenase, NAD-bindin…	D-isomer specific 2-hydroxyacid dehydrogenase, NAD-binding domain | D-isomer specific 2-hydroxyacid dehydrogenase, NAD-binding domain conserved site | D-isomer specific 2-hydroxyacid dehydrogenase, catalytic domain | NAD(P)-binding domain	NO
AT1G72190	3	1:27169330-27169468	-	CE	0.72534	0.87811	-0.15277	0.961	K2	1.0436	D-isomer specific 2-hydroxyacid dehydrogenase family protein	D-isomer specific 2-hydroxyacid dehydrogenase family protein; FUNCTIONS IN: in 6 functions; INVOLVED IN: homoserine biosynthetic process, metabolic process; EXPRESSED IN: 22 plant structures; EXPRESSED DURING: 13 growth stages; CONTAINS InterPro DOMAIN/s: D-isomer specific 2-hydroxyacid dehydrogenase, catalytic domain (InterPro:IPR006139), D-isomer specific 2-hydroxyacid dehydrogenase, NAD-bindin…	D-isomer specific 2-hydroxyacid dehydrogenase, NAD-binding domain | D-isomer specific 2-hydroxyacid dehydrogenase, NAD-binding domain conserved site | D-isomer specific 2-hydroxyacid dehydrogenase, catalytic domain | NAD(P)-binding domain	NO
AT1G72190	24	1:27167527-27167618	-	RI	0.2261	0.059203	0.1669	0.993	K1	0.8183	D-isomer specific 2-hydroxyacid dehydrogenase family protein	D-isomer specific 2-hydroxyacid dehydrogenase family protein; FUNCTIONS IN: in 6 functions; INVOLVED IN: homoserine biosynthetic process, metabolic process; EXPRESSED IN: 22 plant structures; EXPRESSED DURING: 13 growth stages; CONTAINS InterPro DOMAIN/s: D-isomer specific 2-hydroxyacid dehydrogenase, catalytic domain (InterPro:IPR006139), D-isomer specific 2-hydroxyacid dehydrogenase, NAD-bindin…	D-isomer specific 2-hydroxyacid dehydrogenase, NAD-binding domain | D-isomer specific 2-hydroxyacid dehydrogenase, NAD-binding domain conserved site | D-isomer specific 2-hydroxyacid dehydrogenase, catalytic domain | NAD(P)-binding domain	NO
AT1G72190	22	1:27167832-27167957	-	RI	0.313	0.15907	0.15394	0.927	K3	1.9473	D-isomer specific 2-hydroxyacid dehydrogenase family protein	D-isomer specific 2-hydroxyacid dehydrogenase family protein; FUNCTIONS IN: in 6 functions; INVOLVED IN: homoserine biosynthetic process, metabolic process; EXPRESSED IN: 22 plant structures; EXPRESSED DURING: 13 growth stages; CONTAINS InterPro DOMAIN/s: D-isomer specific 2-hydroxyacid dehydrogenase, catalytic domain (InterPro:IPR006139), D-isomer specific 2-hydroxyacid dehydrogenase, NAD-bindin…	D-isomer specific 2-hydroxyacid dehydrogenase, NAD-binding domain | D-isomer specific 2-hydroxyacid dehydrogenase, NAD-binding domain conserved site | D-isomer specific 2-hydroxyacid dehydrogenase, catalytic domain | NAD(P)-binding domain	NO
AT1G72640	14	1:27347148-27347230	-	RI	0.20982	0.053552	0.15627	1	K3	1.5447	NAD(P)-binding Rossmann-fold superfamily protein	NAD(P)-binding Rossmann-fold superfamily protein; FUNCTIONS IN: binding, catalytic activity; INVOLVED IN: metabolic process; LOCATED IN: chloroplast thylakoid membrane, chloroplast; CONTAINS InterPro DOMAIN/s: NAD(P)-binding domain (InterPro:IPR016040)	NAD(P)-binding domain	NO
AT1G72640	12	1:27347309-27347393	-	RI	0.13751	0.029504	0.10801	1	K3	1.5447	NAD(P)-binding Rossmann-fold superfamily protein	NAD(P)-binding Rossmann-fold superfamily protein; FUNCTIONS IN: binding, catalytic activity; INVOLVED IN: metabolic process; LOCATED IN: chloroplast thylakoid membrane, chloroplast; CONTAINS InterPro DOMAIN/s: NAD(P)-binding domain (InterPro:IPR016040)	NAD(P)-binding domain	NO
AT1G72640	8	1:27347499-27347584	-	RI	0.15877	0.025855	0.13292	1	K2	1.486	NAD(P)-binding Rossmann-fold superfamily protein	NAD(P)-binding Rossmann-fold superfamily protein; FUNCTIONS IN: binding, catalytic activity; INVOLVED IN: metabolic process; LOCATED IN: chloroplast thylakoid membrane, chloroplast; CONTAINS InterPro DOMAIN/s: NAD(P)-binding domain (InterPro:IPR016040)	NAD(P)-binding domain	NO
AT1G72640	5	1:27347662-27347769	-	RI	0.23681	0.034392	0.20241	1	K2	1.5485	NAD(P)-binding Rossmann-fold superfamily protein	NAD(P)-binding Rossmann-fold superfamily protein; FUNCTIONS IN: binding, catalytic activity; INVOLVED IN: metabolic process; LOCATED IN: chloroplast thylakoid membrane, chloroplast; CONTAINS InterPro DOMAIN/s: NAD(P)-binding domain (InterPro:IPR016040)	NAD(P)-binding domain	NO
AT1G72650	9	1:27350837-27351193	+	RI	0.28577	0.10068	0.1851	0.949	K1	0.958	TRF-like 6	TRF-like 6 (TRFL6); FUNCTIONS IN: DNA binding, sequence-specific DNA binding transcription factor activity; INVOLVED IN: response to cadmium ion, response to salt stress; EXPRESSED IN: 23 plant structures; EXPRESSED DURING: 13 growth stages; CONTAINS InterPro DOMAIN/s: SANT, DNA-binding (InterPro:IPR001005), Homeodomain-like (InterPro:IPR009057), Myb, DNA-binding (InterPro:IPR014778), HTH transcr…	Homeodomain-like | Myb domain | SANT/Myb domain	NO
AT1G72760	19	1:27385876-27385958	-	RI	0.43596	0.84325	-0.40729	0.959	K1	0.9456	Protein kinase superfamily protein	Protein kinase superfamily protein; FUNCTIONS IN: protein serine/threonine kinase activity, protein kinase activity, kinase activity, ATP binding; INVOLVED IN: protein amino acid phosphorylation, response to stress; LOCATED IN: cellular_component unknown; EXPRESSED IN: pollen tube; CONTAINS InterPro DOMAIN/s: UspA (InterPro:IPR006016), Protein kinase, catalytic domain (InterPro:IPR000719), Serine…	Concanavalin A-like lectin/glucanase, subgroup | Protein kinase domain | Protein kinase-like domain | Rossmann-like alpha/beta/alpha sandwich fold | Serine/threonine-protein kinase, active site | UspA	NO
AT1G72880	4	1:27425982-27426074	-	RI	0.73203	0.88488	-0.15284	0.976	K2	1.1726	Survival protein SurE-like phosphatase/nucleotidase	Survival protein SurE-like phosphatase/nucleotidase; FUNCTIONS IN: hydrolase activity, acid phosphatase activity; INVOLVED IN: biological_process unknown; LOCATED IN: cellular_component unknown; CONTAINS InterPro DOMAIN/s: Survival protein SurE-like phosphatase/nucleotidase (InterPro:IPR002828); BEST Arabidopsis thaliana protein match is: Survival protein SurE-like phosphatase/nucleotidase (TAIR:…	Survival protein SurE-like phosphatase/nucleotidase	NO
AT1G73180	15	1:27519676-27519838	+	RI	0.17117	0.038345	0.13282	0.978	K1	0.6654	Eukaryotic translation initiation factor eIF2A family protein	Eukaryotic translation initiation factor eIF2A family protein; FUNCTIONS IN: molecular_function unknown; INVOLVED IN: biological_process unknown; LOCATED IN: plasma membrane; EXPRESSED IN: 21 plant structures; EXPRESSED DURING: 13 growth stages; CONTAINS InterPro DOMAIN/s: WD40 repeat-like-containing domain (InterPro:IPR011046), Eukaryotic translation initiation factor 2A, central region (InterPr…	Translation initiation factor 2A | Translation initiation factor, beta propellor-like domain | WD40/YVTN repeat-like-containing domain	NO
AT1G73310	13	1:27563946-27564021	-	RI	0.27529	0.058829	0.21646	0.939	K1	0.7219	serine carboxypeptidase-like 4	serine carboxypeptidase-like 4 (scpl4); FUNCTIONS IN: serine-type carboxypeptidase activity; INVOLVED IN: proteolysis; LOCATED IN: endomembrane system; EXPRESSED IN: 16 plant structures; EXPRESSED DURING: 8 growth stages; CONTAINS InterPro DOMAIN/s: Peptidase S10, serine carboxypeptidase (InterPro:IPR001563); BEST Arabidopsis thaliana protein match is: serine carboxypeptidase-like 3 (TAIR:AT1G732…	Alpha/Beta hydrolase fold | Peptidase S10, serine carboxypeptidase	NO
AT1G73470	16	1:27626696-27626780	+	RI	0.15014	0.050017	0.10013	0.976	K1	0.7524		unknown protein; FUNCTIONS IN: molecular_function unknown; INVOLVED IN: biological_process unknown; LOCATED IN: chloroplast; EXPRESSED IN: 22 plant structures; EXPRESSED DURING: 13 growth stages		NO
AT1G73490	8	1:27634293-27634521	-	RI	0.24354	0.37379	-0.13025	0.986	K3	1.5822	RNA-binding (RRM/RBD/RNP motifs) family protein	RNA-binding (RRM/RBD/RNP motifs) family protein; FUNCTIONS IN: RNA binding, nucleotide binding, nucleic acid binding; INVOLVED IN: biological_process unknown; LOCATED IN: cellular_component unknown; EXPRESSED IN: 22 plant structures; EXPRESSED DURING: 13 growth stages; CONTAINS InterPro DOMAIN/s: RNA recognition motif, RNP-1 (InterPro:IPR000504), Nucleotide-binding, alpha-beta plait (InterPro:IPR…	Nucleotide-binding, alpha-beta plait | RNA recognition motif domain	NO
AT1G73875	5	1:27781918-27781970	+	CE	0.50277	0.96472	-0.46195	0.999	K1	0.9834	DNAse I-like superfamily protein	DNAse I-like superfamily protein; CONTAINS InterPro DOMAIN/s: Endonuclease/exonuclease/phosphatase (InterPro:IPR005135); BEST Arabidopsis thaliana protein match is: DNAse I-like superfamily protein (TAIR:AT3G18500.2)	Endonuclease/exonuclease/phosphatase	NO
AT1G73875	5	1:27781706-27781778	+	RI	0.14208	0.03903	0.10305	0.932	K4	2.4009	DNAse I-like superfamily protein	DNAse I-like superfamily protein; CONTAINS InterPro DOMAIN/s: Endonuclease/exonuclease/phosphatase (InterPro:IPR005135); BEST Arabidopsis thaliana protein match is: DNAse I-like superfamily protein (TAIR:AT3G18500.2)	Endonuclease/exonuclease/phosphatase	NO
AT1G73875	7	1:27781845-27781917	+	RI	0.21436	0.086352	0.12801	0.909	K4	2.4009	DNAse I-like superfamily protein	DNAse I-like superfamily protein; CONTAINS InterPro DOMAIN/s: Endonuclease/exonuclease/phosphatase (InterPro:IPR005135); BEST Arabidopsis thaliana protein match is: DNAse I-like superfamily protein (TAIR:AT3G18500.2)	Endonuclease/exonuclease/phosphatase	NO
AT1G73875	9	1:27781971-27782311	+	RI	0.22066	0.072614	0.14804	0.944	K4	2.4009	DNAse I-like superfamily protein	DNAse I-like superfamily protein; CONTAINS InterPro DOMAIN/s: Endonuclease/exonuclease/phosphatase (InterPro:IPR005135); BEST Arabidopsis thaliana protein match is: DNAse I-like superfamily protein (TAIR:AT3G18500.2)	Endonuclease/exonuclease/phosphatase	NO
AT1G73930	4	1:27797681-27797863	-	RI	0.81995	0.67305	0.14689	0.934	K1	0.9287		unknown protein; CONTAINS InterPro DOMAIN/s: Protein of unknown function DUF1630 (InterPro:IPR012860)	DENND6	NO
AT1G73970	3	1:27817591-27817657	+	EI/RI	0.94759	0.6364	0.3112	0.986	K1	0.9996		unknown protein	Armadillo-type fold	NO
AT1G73970	3	1:27817591-27817657	+	RI	0.94759	0.6364	0.3112	0.986	K1	0.9996		unknown protein	Armadillo-type fold	NO
AT1G73970	9	1:27819058-27819153	+	RI	0.25905	0.085807	0.17324	0.997	K1	0.8574		unknown protein	Armadillo-type fold	NO
AT1G74590	4	1:28024098-28024206	-	RI	0.81796	0.68666	0.1313	0.903	K1	0.9306	glutathione S-transferase TAU 10	glutathione S-transferase TAU 10 (GSTU10); CONTAINS InterPro DOMAIN/s: Thioredoxin fold (InterPro:IPR012335), Glutathione S-transferase, C-terminal-like (InterPro:IPR010987), Glutathione S-transferase/chloride channel, C-terminal (InterPro:IPR017933), Glutathione S-transferase, N-terminal (InterPro:IPR004045), Thioredoxin-like fold (InterPro:IPR012336); BEST Arabidopsis thaliana protein match is:…	Glutathione S-transferase, C-terminal-like | Glutathione S-transferase, N-terminal | Thioredoxin-like fold	NO
AT1G74810	20	1:28109214-28109254	+	AD	0.77904	0.92959	-0.15054	0.949	K1	0.8453	HCO3- transporter family	BOR5; FUNCTIONS IN: anion exchanger activity; INVOLVED IN: anion transport; LOCATED IN: integral to membrane, membrane; EXPRESSED IN: 17 plant structures; EXPRESSED DURING: 7 growth stages; CONTAINS InterPro DOMAIN/s: Bicarbonate transporter, eukaryotic (InterPro:IPR003020), Bicarbonate transporter, C-terminal (InterPro:IPR011531); BEST Arabidopsis thaliana protein match is: HCO3- transporter fam…	Bicarbonate transporter, C-terminal | Bicarbonate transporter, eukaryotic	NO
AT1G74810	32	1:28110192-28110268	+	RI	0.29835	0.16839	0.12996	0.91	K1	0.8971	HCO3- transporter family	BOR5; FUNCTIONS IN: anion exchanger activity; INVOLVED IN: anion transport; LOCATED IN: integral to membrane, membrane; EXPRESSED IN: 17 plant structures; EXPRESSED DURING: 7 growth stages; CONTAINS InterPro DOMAIN/s: Bicarbonate transporter, eukaryotic (InterPro:IPR003020), Bicarbonate transporter, C-terminal (InterPro:IPR011531); BEST Arabidopsis thaliana protein match is: HCO3- transporter fam…	Bicarbonate transporter, C-terminal | Bicarbonate transporter, eukaryotic	NO
AT1G74960	30	1:28152274-28152511	-	RI	0.23524	0.11091	0.12433	0.995	K2	1.2998	fatty acid biosynthesis 1	fatty acid biosynthesis 1 (FAB1); CONTAINS InterPro DOMAIN/s: Beta-ketoacyl synthase (InterPro:IPR000794), Thiolase-like (InterPro:IPR016039), Beta-ketoacyl synthase, C-terminal (InterPro:IPR014031), 3-oxoacyl-[acyl-carrier-protein] synthase 2 (InterPro:IPR017568), Beta-ketoacyl synthase, N-terminal (InterPro:IPR014030), Thiolase-like, subgroup (InterPro:IPR016038), Beta-ketoacyl synthase, active…	3-oxoacyl-[acyl-carrier-protein] synthase 2 | Beta-ketoacyl synthase, C-terminal | Beta-ketoacyl synthase, N-terminal | Beta-ketoacyl synthase, active site | Thiolase-like | Thiolase-like, subgroup	NO
AT1G75110	5	1:28194650-28194744	-	RI	0.96755	0.84616	0.12139	0.914	K1	0.7424	Nucleotide-diphospho-sugar transferase family protein	REDUCED RESIDUAL ARABINOSE 2 (RRA2); LOCATED IN: endoplasmic reticulum; EXPRESSED IN: 19 plant structures; EXPRESSED DURING: 6 growth stages; CONTAINS InterPro DOMAIN/s: Reticulon (InterPro:IPR003388), Nucleotide-diphospho-sugar transferase, predicted (InterPro:IPR005069); BEST Arabidopsis thaliana protein match is: Nucleotide-diphospho-sugar transferase family protein (TAIR:AT1G19360.1)	Nucleotide-diphospho-sugar transferase | Nucleotide-diphospho-sugar transferases | Reticulon	NO
AT1G75340	19	1:28269857-28269962	-	RI	0.558	0.15861	0.39939	0.999	K1	1	Zinc finger C-x8-C-x5-C-x3-H type family protein	Zinc finger C-x8-C-x5-C-x3-H type family protein; FUNCTIONS IN: zinc ion binding, nucleic acid binding; INVOLVED IN: biological_process unknown; LOCATED IN: mitochondrion; EXPRESSED IN: 22 plant structures; EXPRESSED DURING: 13 growth stages; CONTAINS InterPro DOMAIN/s: Zinc finger, CCCH-type (InterPro:IPR000571)	Zinc finger, CCCH-type	NO
AT1G75850	8	1:28482710-28482774	-	AA	0.30802	0.44399	-0.13597	0.96	K1	0.9931	VPS35 homolog B	VPS35 homolog B (VPS35B); CONTAINS InterPro DOMAIN/s: Vacuolar protein sorting-associated protein 35 (InterPro:IPR005378); BEST Arabidopsis thaliana protein match is: VPS35 homolog A (TAIR:AT2G17790.1)	Armadillo-type fold | Vacuolar protein sorting-associated protein 35, Vps35	NO
AT1G75980	9	1:28523573-28523718	-	RI	0.11421	0.22235	-0.10815	0.925	K3	1.582	Single hybrid motif superfamily protein	Single hybrid motif superfamily protein; FUNCTIONS IN: molecular_function unknown; INVOLVED IN: glycine catabolic process; LOCATED IN: mitochondrion, glycine cleavage complex; EXPRESSED IN: 22 plant structures; EXPRESSED DURING: 13 growth stages; CONTAINS InterPro DOMAIN/s: Single hybrid motif (InterPro:IPR011053), Glycine cleavage H-protein (InterPro:IPR002930)	Glycine cleavage system H-protein | Single hybrid motif	NO
AT1G76020	7	1:28533204-28533291	-	AD	0.27616	0.13536	0.1408	0.943	K2	1.1432	Thioredoxin superfamily protein	Thioredoxin superfamily protein; INVOLVED IN: biological_process unknown; LOCATED IN: cell wall, vacuole; EXPRESSED IN: 22 plant structures; EXPRESSED DURING: 13 growth stages; CONTAINS InterPro DOMAIN/s: Thioredoxin fold (InterPro:IPR012335), Thioredoxin-like fold (InterPro:IPR012336); BEST Arabidopsis thaliana protein match is: Thioredoxin superfamily protein (TAIR:AT1G20225.1)	Thioredoxin-like fold	NO
AT1G76170	18	1:28584911-28585001	-	RI	0.21951	0.062661	0.15685	0.967	K1	0.8281	2-thiocytidine tRNA biosynthesis protein, TtcA	2-thiocytidine tRNA biosynthesis protein, TtcA; FUNCTIONS IN: ATP binding; INVOLVED IN: tRNA processing; LOCATED IN: cellular_component unknown; EXPRESSED IN: 20 plant structures; EXPRESSED DURING: 13 growth stages; CONTAINS InterPro DOMAIN/s: Rossmann-like alpha/beta/alpha sandwich fold (InterPro:IPR014729), Uncharacterised protein family UPF0021, C-terminal (InterPro:IPR000541), PP-loop (InterP…	2-thiocytidine tRNA biosynthesis protein, TtcA | Cytoplasmic tRNA 2-thiolation protein 1 | Rossmann-like alpha/beta/alpha sandwich fold | tRNA(Ile)-lysidine/2-thiocytidine synthase	NO
AT1G76320	17	1:28633892-28633999	+	RI	0.72693	0.85038	-0.12345	0.977	K2	0.9953	FAR1-related sequence 4	FAR1-related sequence 4 (FRS4); FUNCTIONS IN: zinc ion binding; INVOLVED IN: response to red or far red light; LOCATED IN: cellular_component unknown; EXPRESSED IN: 22 plant structures; EXPRESSED DURING: 13 growth stages; CONTAINS InterPro DOMAIN/s: MULE transposase, conserved domain (InterPro:IPR018289), Transcription factor, FAR1-related (InterPro:IPR004330), Zinc finger, PMZ-type (InterPro:IPR…	FAR1 DNA binding domain | MULE transposase domain | Zinc finger, PMZ-type | Zinc finger, SWIM-type	NO
AT1G76390	5	1:28655897-28655899	+	AA	0.83521	0.9387	-0.10349	0.909	K2	0.9405	ARM repeat superfamily protein	ARM repeat superfamily protein; FUNCTIONS IN: ubiquitin-protein ligase activity, binding; INVOLVED IN: protein ubiquitination; LOCATED IN: plasma membrane; EXPRESSED IN: 23 plant structures; EXPRESSED DURING: 13 growth stages; CONTAINS InterPro DOMAIN/s: U box domain (InterPro:IPR003613), Armadillo-like helical (InterPro:IPR011989), Armadillo (InterPro:IPR000225), Armadillo-type fold (InterPro:IP…	Armadillo | Armadillo-like helical | Armadillo-type fold | U box domain | Zinc finger, RING/FYVE/PHD-type	NO
AT1G76510	5	1:28712734-28712756	-	AD	0.55599	0.33171	0.22427	0.916	K1	0.9892	ARID/BRIGHT DNA-binding domain-containing protein	ARID/BRIGHT DNA-binding domain-containing protein; FUNCTIONS IN: sequence-specific DNA binding transcription factor activity; INVOLVED IN: regulation of transcription; LOCATED IN: intracellular; EXPRESSED IN: 24 plant structures; EXPRESSED IN: 25 plant structures; EXPRESSED DURING: 14 growth stages; CONTAINS InterPro DOMAIN/s: Heat shock protein Hsp20 (InterPro:IPR002068), HSP20-like chaperone (I…	ARID/BRIGHT DNA-binding domain | Alpha crystallin/Hsp20 domain | HSP20-like chaperone	NO
AT1G76570	12	1:28729841-28730012	+	AD	0.092259	0.19387	-0.10161	0.997	K5	2.4864	Chlorophyll A-B binding family protein	Chlorophyll A-B binding family protein; FUNCTIONS IN: chlorophyll binding; INVOLVED IN: response to blue light, response to far red light, photosynthesis; LOCATED IN: light-harvesting complex, chloroplast, membrane; EXPRESSED IN: 28 plant structures; EXPRESSED DURING: 13 growth stages; CONTAINS InterPro DOMAIN/s: Chlorophyll A-B binding protein (InterPro:IPR001344); BEST Arabidopsis thaliana prot…	Chlorophyll A-B binding protein | Chlorophyll A-B binding protein, plant | Chlorophyll a/b binding protein domain	NO
AT1G76580	21	1:28737386-28737428	+	AA	0.75517	0.86902	-0.11385	0.931	K2	1.2969	Squamosa promoter-binding protein-like (SBP domain) transcription factor family protein	Squamosa promoter-binding protein-like (SBP domain) transcription factor family protein; FUNCTIONS IN: sequence-specific DNA binding transcription factor activity; INVOLVED IN: regulation of transcription; LOCATED IN: plasma membrane; EXPRESSED IN: 22 plant structures; EXPRESSED DURING: 13 growth stages; CONTAINS InterPro DOMAIN/s: Transcription factor, SBP-box (InterPro:IPR004333); BEST Arabidop…	Ankyrin repeat | Ankyrin repeat-containing domain | Transcription factor, SBP-box	NO
AT1G76630	6	1:28760192-28760277	+	RI	0.15521	0.045494	0.10972	0.93	K1	0.6632	Tetratricopeptide repeat (TPR)-like superfamily protein	Tetratricopeptide repeat (TPR)-like superfamily protein; FUNCTIONS IN: binding; INVOLVED IN: biological_process unknown; LOCATED IN: cellular_component unknown; EXPRESSED IN: 15 plant structures; EXPRESSED DURING: 6 growth stages; CONTAINS InterPro DOMAIN/s: Tetratricopeptide TPR-1 (InterPro:IPR001440), Tetratricopeptide-like helical (InterPro:IPR011990), Tetratricopeptide repeat-containing (Inte…	Tetratricopeptide TPR2 | Tetratricopeptide repeat | Tetratricopeptide repeat-containing domain | Tetratricopeptide-like helical domain	NO
AT1G76940	11	1:28903377-28903456	-	RI	0.53003	0.32605	0.20398	0.98	K2	1.0526	RNA-binding (RRM/RBD/RNP motifs) family protein	RNA-binding (RRM/RBD/RNP motifs) family protein; FUNCTIONS IN: nucleotide binding, nucleic acid binding; INVOLVED IN: biological_process unknown; EXPRESSED IN: 23 plant structures; EXPRESSED DURING: 15 growth stages; CONTAINS InterPro DOMAIN/s: RNA recognition motif, RNP-1 (InterPro:IPR000504), Nucleotide-binding, alpha-beta plait (InterPro:IPR012677); BEST Arabidopsis thaliana protein match is: …	Nucleotide-binding, alpha-beta plait | RNA recognition motif domain | U1 small nuclear ribonucleoprotein A/U2 small nuclear ribonucleoprotein B''	NO
AT1G77180	3	1:29001665-29001840	-	AA	0.33017	0.21578	0.11439	0.976	K1	0.9315	chromatin protein family	SKIP; CONTAINS InterPro DOMAIN/s: SKI-interacting protein, SKIP (InterPro:IPR017862), SKI-interacting protein SKIP, SNW domain (InterPro:IPR004015); FUNCTIONS IN: transcription activator activity; INVOLVED IN: response to salt stress, response to mannitol stimulus, RNA splicing, response to abscisic acid stimulus; LOCATED IN: nucleolus, nucleus; EXPRESSED IN: 27 plant structures; EXPRESSED DURING…	SKI-interacting protein SKIP, SNW domain | SKI-interacting protein, SKIP	NO
AT1G77220	19	1:29014814-29014901	+	RI	0.12385	0.25651	-0.13265	0.93	K2	0.8946	Protein of unknown function (DUF300)	Protein of unknown function (DUF300); INVOLVED IN: biological_process unknown; LOCATED IN: endomembrane system; EXPRESSED IN: 24 plant structures; EXPRESSED DURING: 14 growth stages; CONTAINS InterPro DOMAIN/s: Protein of unknown function DUF300 (InterPro:IPR005178); BEST Arabidopsis thaliana protein match is: Protein of unknown function (DUF300) (TAIR:AT4G38360.2)	Organic solute transporter subunit alpha/Transmembrane protein 184	NO
AT1G77320	35	1:29061898-29061984	+	EI/RI	0.20784	0.047177	0.16066	0.956	K2	0.8449	transcription coactivators	meiosis defective 1 (MEI1); FUNCTIONS IN: transcription coactivator activity; INVOLVED IN: female meiosis, reciprocal meiotic recombination, response to DNA damage stimulus, male meiosis; LOCATED IN: intracellular; CONTAINS InterPro DOMAIN/s: BRCT (InterPro:IPR001357); BEST Arabidopsis thaliana protein match is: BRCT domain-containing DNA repair protein (TAIR:AT3G43930.2)	BRCT domain	NO
AT1G77320	35	1:29061898-29061984	+	RI	0.20784	0.047177	0.16066	0.956	K2	0.8449	transcription coactivators	meiosis defective 1 (MEI1); FUNCTIONS IN: transcription coactivator activity; INVOLVED IN: female meiosis, reciprocal meiotic recombination, response to DNA damage stimulus, male meiosis; LOCATED IN: intracellular; CONTAINS InterPro DOMAIN/s: BRCT (InterPro:IPR001357); BEST Arabidopsis thaliana protein match is: BRCT domain-containing DNA repair protein (TAIR:AT3G43930.2)	BRCT domain	NO
AT1G77480	17	1:29114835-29114973	-	RI	0.11326	0.24709	-0.13382	0.997	K1	0.8257	Eukaryotic aspartyl protease family protein	Eukaryotic aspartyl protease family protein; FUNCTIONS IN: aspartic-type endopeptidase activity; INVOLVED IN: proteolysis; EXPRESSED IN: 22 plant structures; EXPRESSED DURING: 13 growth stages; CONTAINS InterPro DOMAIN/s: Peptidase aspartic (InterPro:IPR021109), Peptidase aspartic, catalytic (InterPro:IPR009007), Peptidase A1 (InterPro:IPR001461), Peptidase aspartic, active site (InterPro:IPR0019…	Aspartic peptidase | Aspartic peptidase domain | Aspartic peptidase, active site	NO
AT1G78070	16	1:29356665-29356708	+	CE	0.19438	0.34347	-0.14908	1	K4	2.0707	Transducin/WD40 repeat-like superfamily protein	Transducin/WD40 repeat-like superfamily protein; CONTAINS InterPro DOMAIN/s: WD40 repeat 2 (InterPro:IPR019782), WD40 repeat-like-containing domain (InterPro:IPR011046), WD40 repeat, conserved site (InterPro:IPR019775), WD40-repeat-containing domain (InterPro:IPR017986), WD40/YVTN repeat-like-containing domain (InterPro:IPR015943), WD40 repeat (InterPro:IPR001680), WD40 repeat, subgroup (InterPro…	WD40 repeat | WD40 repeat, conserved site | WD40-repeat-containing domain | WD40/YVTN repeat-like-containing domain	NO
AT1G78200	5	1:29420381-29420476	+	RI	0.28163	0.39972	-0.11809	0.919	K1	0.9886	Protein phosphatase 2C family protein	Protein phosphatase 2C family protein; FUNCTIONS IN: protein serine/threonine phosphatase activity, catalytic activity; INVOLVED IN: biological_process unknown; LOCATED IN: plasma membrane; EXPRESSED IN: 24 plant structures; EXPRESSED DURING: 15 growth stages; CONTAINS InterPro DOMAIN/s: Protein phosphatase 2C-related (InterPro:IPR001932), Protein phosphatase 2C (InterPro:IPR015655), Protein phos…	Protein phosphatase 2C | Protein phosphatase 2C (PP2C)-like domain	NO
AT1G78420	11	1:29505742-29505870	+	RI	0.33714	0.11258	0.22456	1	K1	0.9526	RING/U-box superfamily protein	RING/U-box superfamily protein; FUNCTIONS IN: zinc ion binding; EXPRESSED IN: 24 plant structures; INVOLVED IN: N-terminal protein myristoylation; EXPRESSED DURING: 13 growth stages; CONTAINS InterPro DOMAIN/s: Zinc finger, RING-type (InterPro:IPR001841); BEST Arabidopsis thaliana protein match is: RING/U-box superfamily protein (TAIR:AT1G17145.1)	Zinc finger, RING-type	NO
AT1G78810	6	1:29628636-29628692	-	AD	0.59596	0.32023	0.27574	0.975	K2	1.5588		unknown protein		NO
AT1G79020	7	1:29729904-29730096	-	CE	0.865	0.98347	-0.11847	0.934	K1	0.7583	Enhancer of polycomb-like transcription factor protein	Enhancer of polycomb-like transcription factor protein; CONTAINS InterPro DOMAIN/s: Enhancer of polycomb-like (InterPro:IPR019542); BEST Arabidopsis thaliana protein match is: Enhancer of polycomb-like transcription factor protein (TAIR:AT1G16690.1)	Enhancer of polycomb protein | Enhancer of polycomb-like, N-terminal	NO
AT1G79090	18	1:29749367-29749456	-	RI	0.78047	0.65043	0.13004	0.989	K1	0.9652		FUNCTIONS IN: molecular_function unknown; INVOLVED IN: biological_process unknown; LOCATED IN: cellular_component unknown; EXPRESSED IN: 25 plant structures; EXPRESSED DURING: 15 growth stages; CONTAINS InterPro DOMAIN/s: Topoisomerase II-associated protein PAT1 (InterPro:IPR019167); BEST Arabidopsis thaliana protein match is: Topoisomerase II-associated protein PAT1 (TAIR:AT3G22270.1)	Topoisomerase II-associated protein PAT1	NO
AT1G79110	6	1:29759923-29759998	+	RI	0.24158	0.09106	0.15052	0.994	K2	0.9679	zinc ion binding	zinc ion binding; FUNCTIONS IN: zinc ion binding; EXPRESSED IN: 24 plant structures; EXPRESSED DURING: 15 growth stages; CONTAINS InterPro DOMAIN/s: Zinc finger, RING-type (InterPro:IPR001841); BEST Arabidopsis thaliana protein match is: SBP (S-ribonuclease binding protein) family protein (TAIR:AT3G12920.1)	Zinc finger, RING-type	NO
AT1G79245	44	1:29806726-29806783	-	AA	0.82856	0.65592	0.17265	1	K11	4.0707		expressed protein, Several heterogeneous transcript sequences map to this position		NO
AT1G79245	29	1:29807691-29807715	-	AD	0.72185	0.92666	-0.20481	1	K10	4.0547		expressed protein, Several heterogeneous transcript sequences map to this position		NO
AT1G79245	46	1:29806575-29806660	-	RI	0.84044	0.69977	0.14067	1	K11	4.0648		expressed protein, Several heterogeneous transcript sequences map to this position		NO
AT1G79245	43	1:29806784-29806802	-	RI	0.73117	0.56736	0.16381	1	K10	4.042		expressed protein, Several heterogeneous transcript sequences map to this position		NO
AT1G79245	30	1:29807587-29807690	-	RI	0.68102	0.91501	-0.23399	1	K10	4.0648		expressed protein, Several heterogeneous transcript sequences map to this position		NO
AT1G79270	8	1:29816516-29816606	+	RI	0.33873	0.2015	0.13723	0.985	K3	2.1634	evolutionarily conserved C-terminal region 8	evolutionarily conserved C-terminal region 8 (ECT8); CONTAINS InterPro DOMAIN/s: YTH domain (InterPro:IPR007275); BEST Arabidopsis thaliana protein match is: evolutionarily conserved C-terminal region 6 (TAIR:AT3G17330.1)	YTH domain	NO
AT1G79500	18	1:29906108-29906287	+	AA	0.84181	0.68638	0.15543	0.995	K2	1.9148	Aldolase-type TIM barrel family protein	AtkdsA1; FUNCTIONS IN: 3-deoxy-8-phosphooctulonate synthase activity; INVOLVED IN: metabolic process, rhamnogalacturonan II biosynthetic process; LOCATED IN: cytoplasm; LOCATED IN: endomembrane system, cytoplasm; EXPRESSED IN: 22 plant structures; EXPRESSED DURING: 13 growth stages; CONTAINS InterPro DOMAIN/s: DAHP synthetase I/KDSA (InterPro:IPR006218), Aldolase-type TIM barrel (InterPro:IPR0137…	3-deoxy-8-phosphooctulonate synthase | Aldolase-type TIM barrel | DAHP synthetase I/KDSA	NO
AT1G79530	24	1:29916460-29916543	-	RI	0.19908	0.5595	-0.36042	0.998	K1	0.9981	glyceraldehyde-3-phosphate dehydrogenase of plastid 1	glyceraldehyde-3-phosphate dehydrogenase of plastid 1 (GAPCP-1); FUNCTIONS IN: glyceraldehyde-3-phosphate dehydrogenase (phosphorylating) activity, copper ion binding, glyceraldehyde-3-phosphate dehydrogenase activity, zinc ion binding; INVOLVED IN: in 6 processes; LOCATED IN: plastid, membrane; EXPRESSED IN: guard cell, leaf; CONTAINS InterPro DOMAIN/s: Glyceraldehyde 3-phosphate dehydrogenase s…	Glyceraldehyde 3-phosphate dehydrogenase, NAD(P) binding domain | Glyceraldehyde 3-phosphate dehydrogenase, active site | Glyceraldehyde 3-phosphate dehydrogenase, catalytic domain | Glyceraldehyde-3-phosphate dehydrogenase, type I | Glyceraldehyde/Erythrose phosphate dehydrogenase family | NAD(P)-binding domain	NO
AT1G79570	9	1:29934669-29934741	-	RI	0.14604	0.037797	0.10824	0.961	K3	1.2739	Protein kinase superfamily protein with octicosapeptide/Phox/Bem1p domain	Protein kinase superfamily protein with octicosapeptide/Phox/Bem1p domain; FUNCTIONS IN: protein serine/threonine/tyrosine kinase activity, protein kinase activity; INVOLVED IN: protein amino acid phosphorylation; LOCATED IN: cytosol; EXPRESSED IN: male gametophyte, pollen tube; EXPRESSED DURING: L mature pollen stage, M germinated pollen stage; CONTAINS InterPro DOMAIN/s: Octicosapeptide/Phox/Be…	Phox/Bem1p | Protein kinase domain | Protein kinase, ATP binding site | Protein kinase-like domain | Serine-threonine/tyrosine-protein kinase catalytic domain	NO
AT1G79610	7	1:29956361-29956485	-	RI	0.4932	0.15176	0.34144	0.998	K1	0.9999	Na+/H+ antiporter 6	Na+/H+ antiporter 6 (NHX6); FUNCTIONS IN: solute:hydrogen antiporter activity, sodium:hydrogen antiporter activity; INVOLVED IN: cation transport, sodium ion transport, regulation of pH, transmembrane transport; LOCATED IN: integral to membrane; EXPRESSED IN: 25 plant structures; EXPRESSED DURING: 15 growth stages; CONTAINS InterPro DOMAIN/s: Na+/H+ exchanger, subfamily (InterPro:IPR004709), Cati…	Cation/H+ exchanger | Cation/H+ exchanger, CPA1 family | Na+/H+ exchanger	NO
AT1G79640	10	1:29971249-29971366	-	RI	0.10324	0.41827	-0.31503	0.975	K2	1.9285	Protein kinase superfamily protein	Protein kinase superfamily protein; FUNCTIONS IN: protein serine/threonine kinase activity, protein kinase activity, kinase activity, ATP binding; INVOLVED IN: protein amino acid phosphorylation; LOCATED IN: cellular_component unknown; EXPRESSED IN: 23 plant structures; EXPRESSED DURING: 14 growth stages; CONTAINS InterPro DOMAIN/s: Protein kinase, ATP binding site (InterPro:IPR017441), Protein k…	Protein kinase domain | Protein kinase, ATP binding site | Protein kinase-like domain | Serine/threonine/dual specificity protein kinase, catalytic domain	NO
AT1G79700	10	1:29991955-29992005	-	CE	0.825	0.97097	-0.14597	1	K3	1.8828	Integrase-type DNA-binding superfamily protein	Integrase-type DNA-binding superfamily protein; CONTAINS InterPro DOMAIN/s: DNA-binding, integrase-type (InterPro:IPR016177), Pathogenesis-related transcriptional factor/ERF, DNA-binding (InterPro:IPR001471); BEST Arabidopsis thaliana protein match is: ARIA-interacting double AP2 domain protein (TAIR:AT1G16060.1)	AP2/ERF domain | DNA-binding domain	NO
AT1G79700	18	1:29990826-29991803	-	RI	0.32635	0.49686	-0.17051	0.998	K6	3.271	Integrase-type DNA-binding superfamily protein	Integrase-type DNA-binding superfamily protein; CONTAINS InterPro DOMAIN/s: DNA-binding, integrase-type (InterPro:IPR016177), Pathogenesis-related transcriptional factor/ERF, DNA-binding (InterPro:IPR001471); BEST Arabidopsis thaliana protein match is: ARIA-interacting double AP2 domain protein (TAIR:AT1G16060.1)	AP2/ERF domain | DNA-binding domain	NO
AT1G79710	11	1:29996684-29996828	+	EI/RI	0.53423	0.79087	-0.25663	0.937	K1	0.9911	Major facilitator superfamily protein	Major facilitator superfamily protein; CONTAINS InterPro DOMAIN/s: Major facilitator superfamily, general substrate transporter (InterPro:IPR016196), Biopterin transport-related protein BT1 (InterPro:IPR004324); BEST Arabidopsis thaliana protein match is: Major facilitator superfamily protein (TAIR:AT5G25050.1)	Biopterin transport-related protein BT1 | Major facilitator superfamily domain, general substrate transporter	NO
AT1G79710	11	1:29996684-29996828	+	RI	0.53423	0.79087	-0.25663	0.937	K1	0.9911	Major facilitator superfamily protein	Major facilitator superfamily protein; CONTAINS InterPro DOMAIN/s: Major facilitator superfamily, general substrate transporter (InterPro:IPR016196), Biopterin transport-related protein BT1 (InterPro:IPR004324); BEST Arabidopsis thaliana protein match is: Major facilitator superfamily protein (TAIR:AT5G25050.1)	Biopterin transport-related protein BT1 | Major facilitator superfamily domain, general substrate transporter	NO
AT1G79790	10	1:30017443-30017517	-	EI/RI	0.34922	0.19274	0.15648	1	K6	3.8011	Haloacid dehalogenase-like hydrolase (HAD) superfamily protein	Haloacid dehalogenase-like hydrolase (HAD) superfamily protein; FUNCTIONS IN: hydrolase activity; LOCATED IN: chloroplast; EXPRESSED IN: 23 plant structures; EXPRESSED DURING: 13 growth stages; CONTAINS InterPro DOMAIN/s: HAD-superfamily hydrolase, subfamily IA, variant 3 (InterPro:IPR006402)	HAD hydrolase, subfamily IA | HAD-like domain	NO
AT1G79790	10	1:30017443-30017517	-	RI	0.34922	0.19274	0.15648	1	K6	3.8011	Haloacid dehalogenase-like hydrolase (HAD) superfamily protein	Haloacid dehalogenase-like hydrolase (HAD) superfamily protein; FUNCTIONS IN: hydrolase activity; LOCATED IN: chloroplast; EXPRESSED IN: 23 plant structures; EXPRESSED DURING: 13 growth stages; CONTAINS InterPro DOMAIN/s: HAD-superfamily hydrolase, subfamily IA, variant 3 (InterPro:IPR006402)	HAD hydrolase, subfamily IA | HAD-like domain	NO
AT1G79790	7	1:30017633-30017712	-	RI	0.20128	0.076896	0.12438	0.996	K6	3.8011	Haloacid dehalogenase-like hydrolase (HAD) superfamily protein	Haloacid dehalogenase-like hydrolase (HAD) superfamily protein; FUNCTIONS IN: hydrolase activity; LOCATED IN: chloroplast; EXPRESSED IN: 23 plant structures; EXPRESSED DURING: 13 growth stages; CONTAINS InterPro DOMAIN/s: HAD-superfamily hydrolase, subfamily IA, variant 3 (InterPro:IPR006402)	HAD hydrolase, subfamily IA | HAD-like domain	NO
AT1G79790	5	1:30017765-30017829	-	RI	0.24757	0.11503	0.13254	0.998	K6	3.8011	Haloacid dehalogenase-like hydrolase (HAD) superfamily protein	Haloacid dehalogenase-like hydrolase (HAD) superfamily protein; FUNCTIONS IN: hydrolase activity; LOCATED IN: chloroplast; EXPRESSED IN: 23 plant structures; EXPRESSED DURING: 13 growth stages; CONTAINS InterPro DOMAIN/s: HAD-superfamily hydrolase, subfamily IA, variant 3 (InterPro:IPR006402)	HAD hydrolase, subfamily IA | HAD-like domain	NO
AT1G79790	3	1:30017906-30017971	-	RI	0.34453	0.10181	0.24272	1	K6	3.8011	Haloacid dehalogenase-like hydrolase (HAD) superfamily protein	Haloacid dehalogenase-like hydrolase (HAD) superfamily protein; FUNCTIONS IN: hydrolase activity; LOCATED IN: chloroplast; EXPRESSED IN: 23 plant structures; EXPRESSED DURING: 13 growth stages; CONTAINS InterPro DOMAIN/s: HAD-superfamily hydrolase, subfamily IA, variant 3 (InterPro:IPR006402)	HAD hydrolase, subfamily IA | HAD-like domain	NO
AT1G79830	54	1:30027976-30028069	-	RI	0.34345	0.48975	-0.14631	0.998	K1	1	golgin candidate 5	golgin candidate 5 (GC5); FUNCTIONS IN: protein binding; INVOLVED IN: biological_process unknown; LOCATED IN: Golgi apparatus, cytoplasm; LOCATED IN: Golgi apparatus, nucleus, cytoplasm; EXPRESSED IN: 24 plant structures; EXPRESSED IN: 25 plant structures; EXPRESSED DURING: 15 growth stages; CONTAINS InterPro DOMAIN/s: TATA element modulatory factor 1 DNA binding (InterPro:IPR022092), TATA elemen…	TATA element modulatory factor 1 DNA binding | TATA element modulatory factor 1 TATA binding	NO
AT1G79870	3	1:30045194-30045216	+	AD	0.81985	0.94469	-0.12484	0.956	K2	0.9946	D-isomer specific 2-hydroxyacid dehydrogenase family protein	D-isomer specific 2-hydroxyacid dehydrogenase family protein; FUNCTIONS IN: in 6 functions; INVOLVED IN: metabolic process; EXPRESSED IN: 22 plant structures; EXPRESSED DURING: 13 growth stages; CONTAINS InterPro DOMAIN/s: D-isomer specific 2-hydroxyacid dehydrogenase, catalytic domain (InterPro:IPR006139), D-isomer specific 2-hydroxyacid dehydrogenase, NAD-binding (InterPro:IPR006140), NAD(P)-bi…	D-isomer specific 2-hydroxyacid dehydrogenase, NAD-binding domain | D-isomer specific 2-hydroxyacid dehydrogenase, NAD-binding domain conserved site 1 | D-isomer specific 2-hydroxyacid dehydrogenase, catalytic domain | NAD(P)-binding domain	NO
AT1G79880	9	1:30048050-30048124	-	RI	0.88738	0.49456	0.39283	1	K1	0.9803	RNA recognition motif (RRM)-containing protein	RNA recognition motif (RRM)-containing protein; FUNCTIONS IN: RNA binding, nucleotide binding, nucleic acid binding; FUNCTIONS IN: nucleotide binding, nucleic acid binding; EXPRESSED IN: 22 plant structures; INVOLVED IN: RNA processing; EXPRESSED DURING: 13 growth stages; LOCATED IN: ribonucleoprotein complex, nucleus; CONTAINS InterPro DOMAIN/s: RNA recognition motif, RNP-1 (InterPro:IPR000504),…	Lupus La protein | Nucleotide-binding, alpha-beta plait | RNA recognition motif domain | RNA-binding motif | RNA-binding protein Lupus La | Winged helix-turn-helix DNA-binding domain	NO
AT1G79950	19	1:30078555-30078608	+	CE	0.64005	0.85541	-0.21535	1	K2	1.4007	RAD3-like DNA-binding helicase protein	RAD3-like DNA-binding helicase protein; FUNCTIONS IN: in 6 functions; INVOLVED IN: regulation of transcription, DNA-dependent, nucleobase, nucleoside, nucleotide and nucleic acid metabolic process; LOCATED IN: mitochondrion; EXPRESSED IN: 25 plant structures; EXPRESSED DURING: 15 growth stages; CONTAINS InterPro DOMAIN/s: DEAD2 (InterPro:IPR010614), DEAD-like helicase, N-terminal (InterPro:IPR014…	ATP-dependent helicase, C-terminal | DEAD2 | DNA helicase (DNA repair), Rad3 type | Helicase, superfamily 1/2, ATP-binding domain | Helicase, superfamily 1/2, ATP-binding domain, DinG/Rad3-type | P-loop containing nucleoside triphosphate hydrolase | Paired amphipathic helix	NO
AT1G80000	7	1:30093079-30093160	+	RI	0.60136	0.29899	0.30238	0.997	K2	1.2768	CASC3/Barentsz eIF4AIII binding	CASC3/Barentsz eIF4AIII binding; CONTAINS InterPro DOMAIN/s: CASC3/Barentsz eIF4AIII binding (InterPro:IPR018545); BEST Arabidopsis thaliana protein match is: CASC3/Barentsz eIF4AIII binding (TAIR:AT1G15280.2)	Btz domain	NO
AT1G80150	4	1:30149666-30149760	+	EI/RI	0.9274	0.58893	0.33848	0.977	K1	1	Tetratricopeptide repeat (TPR)-like superfamily protein	Tetratricopeptide repeat (TPR)-like superfamily protein; FUNCTIONS IN: molecular_function unknown; INVOLVED IN: biological_process unknown; EXPRESSED IN: fruit; CONTAINS InterPro DOMAIN/s: Pentatricopeptide repeat (InterPro:IPR002885); BEST Arabidopsis thaliana protein match is: Tetratricopeptide repeat (TPR)-like superfamily protein (TAIR:AT4G36680.1)	Pentatricopeptide repeat	NO
AT1G80150	4	1:30149666-30149760	+	RI	0.9274	0.58893	0.33848	0.977	K1	1	Tetratricopeptide repeat (TPR)-like superfamily protein	Tetratricopeptide repeat (TPR)-like superfamily protein; FUNCTIONS IN: molecular_function unknown; INVOLVED IN: biological_process unknown; EXPRESSED IN: fruit; CONTAINS InterPro DOMAIN/s: Pentatricopeptide repeat (InterPro:IPR002885); BEST Arabidopsis thaliana protein match is: Tetratricopeptide repeat (TPR)-like superfamily protein (TAIR:AT4G36680.1)	Pentatricopeptide repeat	NO
AT1G80190	5	1:30159246-30159332	+	AD	0.82044	0.68059	0.13985	0.958	K3	2.0771	partner of SLD five 1	partner of SLD five 1 (PSF1); FUNCTIONS IN: molecular_function unknown; INVOLVED IN: DNA-dependent DNA replication initiation; LOCATED IN: GINS complex, chloroplast; EXPRESSED IN: 23 plant structures; EXPRESSED DURING: 13 growth stages; CONTAINS InterPro DOMAIN/s: GINS complex, subunit Psf1 (InterPro:IPR005339)	GINS complex, subunit Psf1	NO
AT1G80245	13	1:30174976-30175060	+	EI/RI	0.86191	0.7138	0.14811	0.908	K1	0.971	Spc97 / Spc98 family of spindle pole body (SBP) component	Spc97 / Spc98 family of spindle pole body (SBP) component; FUNCTIONS IN: molecular_function unknown; INVOLVED IN: microtubule cytoskeleton organization; LOCATED IN: spindle pole, microtubule organizing center; EXPRESSED IN: 20 plant structures; EXPRESSED DURING: 12 growth stages; CONTAINS InterPro DOMAIN/s: Spc97/Spc98 (InterPro:IPR007259); BEST Arabidopsis thaliana protein match is: unknown prot…	Gamma-tubulin complex component protein	NO
AT1G80245	13	1:30174976-30175060	+	RI	0.86191	0.7138	0.14811	0.908	K1	0.971	Spc97 / Spc98 family of spindle pole body (SBP) component	Spc97 / Spc98 family of spindle pole body (SBP) component; FUNCTIONS IN: molecular_function unknown; INVOLVED IN: microtubule cytoskeleton organization; LOCATED IN: spindle pole, microtubule organizing center; EXPRESSED IN: 20 plant structures; EXPRESSED DURING: 12 growth stages; CONTAINS InterPro DOMAIN/s: Spc97/Spc98 (InterPro:IPR007259); BEST Arabidopsis thaliana protein match is: unknown prot…	Gamma-tubulin complex component protein	NO
AT1G80270	4	1:30181054-30181077	+	AD	0.93274	0.77117	0.16157	0.907	K2	1.4558	PENTATRICOPEPTIDE REPEAT 596	PENTATRICOPEPTIDE REPEAT 596 (PPR596); FUNCTIONS IN: DNA binding; INVOLVED IN: biological_process unknown; EXPRESSED IN: 23 plant structures; LOCATED IN: chloroplast envelope; EXPRESSED DURING: 13 growth stages; CONTAINS InterPro DOMAIN/s: Pentatricopeptide repeat (InterPro:IPR002885); BEST Arabidopsis thaliana protein match is: Tetratricopeptide repeat (TPR)-like superfamily protein (TAIR:AT1G15…	Pentatricopeptide repeat | Tetratricopeptide-like helical domain	NO
AT1G80360	13	1:30210672-30210761	-	RI	0.30891	0.14529	0.16362	0.956	K2	1.6887	Pyridoxal phosphate (PLP)-dependent transferases superfamily protein	Pyridoxal phosphate (PLP)-dependent transferases superfamily protein; FUNCTIONS IN: transferase activity, transferring nitrogenous groups, pyridoxal phosphate binding, transaminase activity, catalytic activity; INVOLVED IN: asparagine catabolic process, biosynthetic process, glutamate catabolic process to oxaloacetate, aspartate transamidation; EXPRESSED IN: 25 plant structures; EXPRESSED DURING:…	Aminotransferase, class I/classII | Aminotransferases, class-I, pyridoxal-phosphate-binding site | Pyridoxal phosphate-dependent transferase | Pyridoxal phosphate-dependent transferase, major region, subdomain 1 | Pyridoxal phosphate-dependent transferase, major region, subdomain 2	NO
AT1G80420	10	1:30237206-30237319	-	AA	0.62242	0.503	0.11942	0.911	K2	1.5422	BRCT domain-containing DNA repair protein	ATXRCC1; FUNCTIONS IN: transcription coactivator activity; INVOLVED IN: DNA repair; LOCATED IN: intracellular; EXPRESSED IN: 23 plant structures; EXPRESSED DURING: 13 growth stages; CONTAINS InterPro DOMAIN/s: BRCT (InterPro:IPR001357)	BRCT domain	NO
AT1G80500	9	1:30271893-30271963	+	RI	0.19323	0.070887	0.12235	1	K1	0.7306	SNARE-like superfamily protein	SNARE-like superfamily protein; FUNCTIONS IN: molecular_function unknown; INVOLVED IN: transport, ER to Golgi vesicle-mediated transport; LOCATED IN: intracellular; EXPRESSED IN: 24 plant structures; EXPRESSED DURING: 15 growth stages; CONTAINS InterPro DOMAIN/s: Sedlin (InterPro:IPR006722), Longin-like (InterPro:IPR011012); BEST Arabidopsis thaliana protein match is: SNARE-like superfamily prote…	Longin-like domain | Sedlin	NO
AT1G80500	11	1:30272026-30272168	+	RI	0.21466	0.055286	0.15937	1	K1	0.7975	SNARE-like superfamily protein	SNARE-like superfamily protein; FUNCTIONS IN: molecular_function unknown; INVOLVED IN: transport, ER to Golgi vesicle-mediated transport; LOCATED IN: intracellular; EXPRESSED IN: 24 plant structures; EXPRESSED DURING: 15 growth stages; CONTAINS InterPro DOMAIN/s: Sedlin (InterPro:IPR006722), Longin-like (InterPro:IPR011012); BEST Arabidopsis thaliana protein match is: SNARE-like superfamily prote…	Longin-like domain | Sedlin	NO
AT1G80550	4	1:30286303-30286430	-	EI/RI	0.9444	0.80558	0.13882	0.973	K1	0.8399	Pentatricopeptide repeat (PPR) superfamily protein	Pentatricopeptide repeat (PPR) superfamily protein; INVOLVED IN: biological_process unknown; LOCATED IN: mitochondrion; EXPRESSED IN: 24 plant structures; EXPRESSED DURING: 15 growth stages; CONTAINS InterPro DOMAIN/s: Pentatricopeptide repeat (InterPro:IPR002885); BEST Arabidopsis thaliana protein match is: Tetratricopeptide repeat (TPR)-like superfamily protein (TAIR:AT5G15010.1)	Pentatricopeptide repeat	NO
AT1G80550	4	1:30286303-30286430	-	RI	0.9444	0.80558	0.13882	0.973	K1	0.8399	Pentatricopeptide repeat (PPR) superfamily protein	Pentatricopeptide repeat (PPR) superfamily protein; INVOLVED IN: biological_process unknown; LOCATED IN: mitochondrion; EXPRESSED IN: 24 plant structures; EXPRESSED DURING: 15 growth stages; CONTAINS InterPro DOMAIN/s: Pentatricopeptide repeat (InterPro:IPR002885); BEST Arabidopsis thaliana protein match is: Tetratricopeptide repeat (TPR)-like superfamily protein (TAIR:AT5G15010.1)	Pentatricopeptide repeat	NO
AT1G80640	13	1:30313102-30313178	+	RI	0.19785	0.064451	0.1334	0.977	K1	0.798	Protein kinase superfamily protein	Protein kinase superfamily protein; FUNCTIONS IN: kinase activity; INVOLVED IN: protein amino acid phosphorylation; LOCATED IN: endomembrane system; EXPRESSED IN: 21 plant structures; EXPRESSED DURING: 13 growth stages; CONTAINS InterPro DOMAIN/s: Protein kinase, catalytic domain (InterPro:IPR000719), Serine-threonine/tyrosine-protein kinase (InterPro:IPR001245), Protein kinase-like domain (Inter…	Concanavalin A-like lectin/glucanase, subgroup | Protein kinase domain | Protein kinase-like domain | Serine-threonine/tyrosine-protein kinase catalytic domain	NO
AT1G80650	7	1:30315441-30315470	+	AA	0.5969	0.77796	-0.18106	0.996	K2	1.8477	RNAse THREE-like protein 1	RNAse THREE-like protein 1 (RTL1); FUNCTIONS IN: double-stranded RNA binding, RNA binding; INVOLVED IN: biological_process unknown; LOCATED IN: intracellular; CONTAINS InterPro DOMAIN/s: Double-stranded RNA-binding (InterPro:IPR001159), Double-stranded RNA-binding-like (InterPro:IPR014720); BEST Arabidopsis thaliana protein match is: Double-stranded RNA-binding domain (DsRBD)-containing protein (…	Double-stranded RNA-binding domain	NO
AT1G80650	8	1:30315471-30315481	+	AA	0.66784	0.79098	-0.12314	0.97	K2	1.8477	RNAse THREE-like protein 1	RNAse THREE-like protein 1 (RTL1); FUNCTIONS IN: double-stranded RNA binding, RNA binding; INVOLVED IN: biological_process unknown; LOCATED IN: intracellular; CONTAINS InterPro DOMAIN/s: Double-stranded RNA-binding (InterPro:IPR001159), Double-stranded RNA-binding-like (InterPro:IPR014720); BEST Arabidopsis thaliana protein match is: Double-stranded RNA-binding domain (DsRBD)-containing protein (…	Double-stranded RNA-binding domain	NO
AT1G80810	17	1:30368072-30368074	+	AA	0.2843	0.13679	0.14751	0.921	K1	0.9183	Tudor/PWWP/MBT superfamily protein	Tudor/PWWP/MBT superfamily protein; FUNCTIONS IN: binding; INVOLVED IN: biological_process unknown; LOCATED IN: cellular_component unknown; EXPRESSED IN: 19 plant structures; EXPRESSED DURING: 6 growth stages; CONTAINS InterPro DOMAIN/s: Armadillo-type fold (InterPro:IPR016024); BEST Arabidopsis thaliana protein match is: Tudor/PWWP/MBT superfamily protein (TAIR:AT1G15940.1)	Armadillo-type fold	NO
AT1G80860	5	1:30388303-30388378	-	RI	0.51158	0.2034	0.30818	0.98	K2	1.4263	phospholipid N-methyltransferase	phospholipid N-methyltransferase (PLMT); CONTAINS InterPro DOMAIN/s: Phospholipid methyltransferase (InterPro:IPR007318)	Phosphatidyl-N-methylethanolamine/N-methyltransferase | Phospholipid methyltransferase	NO
AT1G80940	11	1:30411604-30411680	+	AD	0.79347	0.89355	-0.10008	1	K2	1.3736		unknown protein		NO
AT2G01270	5	2:139621-139650	+	AD	0.99412	0.84978	0.14434	1	K3	1.343	quiescin-sulfhydryl oxidase 2	quiescin-sulfhydryl oxidase 2 (QSOX2); FUNCTIONS IN: thiol oxidase activity; INVOLVED IN: oxidation reduction, cell redox homeostasis; LOCATED IN: Golgi apparatus; EXPRESSED IN: 24 plant structures; EXPRESSED DURING: 13 growth stages; CONTAINS InterPro DOMAIN/s: Thioredoxin fold (InterPro:IPR012335), Erv1/Alr (InterPro:IPR006863), Thioredoxin domain (InterPro:IPR013766), Thioredoxin, conserved si…	ERV/ALR sulfhydryl oxidase domain | Thioredoxin domain | Thioredoxin, conserved site | Thioredoxin-like fold	NO
AT2G01270	7	2:139716-139770	+	CE	0.1224	0.24819	-0.12579	0.966	K3	1.343	quiescin-sulfhydryl oxidase 2	quiescin-sulfhydryl oxidase 2 (QSOX2); FUNCTIONS IN: thiol oxidase activity; INVOLVED IN: oxidation reduction, cell redox homeostasis; LOCATED IN: Golgi apparatus; EXPRESSED IN: 24 plant structures; EXPRESSED DURING: 13 growth stages; CONTAINS InterPro DOMAIN/s: Thioredoxin fold (InterPro:IPR012335), Erv1/Alr (InterPro:IPR006863), Thioredoxin domain (InterPro:IPR013766), Thioredoxin, conserved si…	ERV/ALR sulfhydryl oxidase domain | Thioredoxin domain | Thioredoxin, conserved site | Thioredoxin-like fold	NO
AT2G01450	11	2:201605-201683	-	AD	0.58943	0.8202	-0.23077	1	K2	1.3774	MAP kinase 17	MAP kinase 17 (MPK17); CONTAINS InterPro DOMAIN/s: MAP kinase, conserved site (InterPro:IPR003527), Protein kinase, ATP binding site (InterPro:IPR017441), Protein kinase, catalytic domain (InterPro:IPR000719), Serine/threonine-protein kinase domain (InterPro:IPR002290), Tyrosine-protein kinase, catalytic domain (InterPro:IPR020635), Serine/threonine-protein kinase-like domain (InterPro:IPR017442)…	Mitogen-activated protein (MAP) kinase, conserved site | Protein kinase domain | Protein kinase, ATP binding site | Protein kinase-like domain | Serine/threonine/dual specificity protein kinase, catalytic domain	NO
AT2G01450	20	2:200793-200947	-	RI	0.40416	0.56843	-0.16428	1	K1	0.9874	MAP kinase 17	MAP kinase 17 (MPK17); CONTAINS InterPro DOMAIN/s: MAP kinase, conserved site (InterPro:IPR003527), Protein kinase, ATP binding site (InterPro:IPR017441), Protein kinase, catalytic domain (InterPro:IPR000719), Serine/threonine-protein kinase domain (InterPro:IPR002290), Tyrosine-protein kinase, catalytic domain (InterPro:IPR020635), Serine/threonine-protein kinase-like domain (InterPro:IPR017442)…	Mitogen-activated protein (MAP) kinase, conserved site | Protein kinase domain | Protein kinase, ATP binding site | Protein kinase-like domain | Serine/threonine/dual specificity protein kinase, catalytic domain	NO
AT2G01450	14	2:201489-201604	-	RI	0.040486	0.21588	-0.1754	1	K2	1.3777	MAP kinase 17	MAP kinase 17 (MPK17); CONTAINS InterPro DOMAIN/s: MAP kinase, conserved site (InterPro:IPR003527), Protein kinase, ATP binding site (InterPro:IPR017441), Protein kinase, catalytic domain (InterPro:IPR000719), Serine/threonine-protein kinase domain (InterPro:IPR002290), Tyrosine-protein kinase, catalytic domain (InterPro:IPR020635), Serine/threonine-protein kinase-like domain (InterPro:IPR017442)…	Mitogen-activated protein (MAP) kinase, conserved site | Protein kinase domain | Protein kinase, ATP binding site | Protein kinase-like domain | Serine/threonine/dual specificity protein kinase, catalytic domain	NO
AT2G01470	5	2:213547-213551	-	AA	0.28757	0.18065	0.10693	0.968	K1	0.9273	SEC12P-like 2 protein	SEC12P-like 2 protein (STL2P); FUNCTIONS IN: nucleotide binding; INVOLVED IN: ER to Golgi vesicle-mediated transport; LOCATED IN: integral to endoplasmic reticulum membrane, endoplasmic reticulum, plasma membrane, membrane; EXPRESSED IN: 25 plant structures; EXPRESSED DURING: 13 growth stages; CONTAINS InterPro DOMAIN/s: WD40 repeat-like-containing domain (InterPro:IPR011046), WD40-repeat-contain…	Quinonprotein alcohol dehydrogenase-like superfamily | WD40 repeat | WD40-repeat-containing domain | WD40/YVTN repeat-like-containing domain	NO
AT2G01490	19	2:223213-223427	+	RI	0.66146	0.80892	-0.14745	1	K1	0.9258	phytanoyl-CoA dioxygenase (PhyH) family protein	phytanoyl-CoA dioxygenase (PhyH) family protein; FUNCTIONS IN: phytanoyl-CoA dioxygenase activity; INVOLVED IN: N-terminal protein myristoylation; LOCATED IN: plasma membrane; EXPRESSED IN: 25 plant structures; EXPRESSED DURING: 15 growth stages; CONTAINS InterPro DOMAIN/s: Phytanoyl-CoA dioxygenase (InterPro:IPR008775)	Phytanoyl-CoA dioxygenase	NO
AT2G01930	6	2:428224-428331	-	RI	0.53548	0.40746	0.12802	0.986	K2	1.1317	basic pentacysteine1	basic pentacysteine1 (BPC1); FUNCTIONS IN: DNA binding, sequence-specific DNA binding transcription factor activity, specific transcriptional repressor activity; INVOLVED IN: regulation of transcription, DNA-dependent; LOCATED IN: nucleus; EXPRESSED IN: 24 plant structures; EXPRESSED DURING: 15 growth stages; CONTAINS InterPro DOMAIN/s: GAGA binding-like (InterPro:IPR010409); BEST Arabidopsis tha…	GAGA-binding transcriptional activator	NO
AT2G02080	5	2:521363-521432	-	AD	0.38178	0.22464	0.15714	0.949	K2	1.7281	indeterminate(ID)-domain 4	indeterminate(ID)-domain 4 (IDD4); FUNCTIONS IN: sequence-specific DNA binding transcription factor activity; LOCATED IN: intracellular; LOCATED IN: intracellular, chloroplast; EXPRESSED IN: 20 plant structures; EXPRESSED DURING: 13 growth stages; CONTAINS InterPro DOMAIN/s: Zinc finger, C2H2-like (InterPro:IPR015880), Zinc finger, C2H2-type (InterPro:IPR007087), Zinc finger, double-stranded RNA …	Zinc finger C2H2-type/integrase DNA-binding domain | Zinc finger, C2H2 | Zinc finger, C2H2-like	NO
AT2G02080	6	2:521206-521362	-	RI	0.35695	0.20272	0.15423	0.951	K2	1.7255	indeterminate(ID)-domain 4	indeterminate(ID)-domain 4 (IDD4); FUNCTIONS IN: sequence-specific DNA binding transcription factor activity; LOCATED IN: intracellular; LOCATED IN: intracellular, chloroplast; EXPRESSED IN: 20 plant structures; EXPRESSED DURING: 13 growth stages; CONTAINS InterPro DOMAIN/s: Zinc finger, C2H2-like (InterPro:IPR015880), Zinc finger, C2H2-type (InterPro:IPR007087), Zinc finger, double-stranded RNA …	Zinc finger C2H2-type/integrase DNA-binding domain | Zinc finger, C2H2 | Zinc finger, C2H2-like	NO
AT2G02148	3	2:549520-549531	-	AD	0.36694	0.14374	0.2232	0.924	K2	1.8139		unknown protein	Zinc finger C2HC domain-containing protein	NO
AT2G02450	9	2:650396-650500	+	EI/RI	0.76989	0.47344	0.29645	0.994	K1	1	NAC domain containing protein 35	LONG VEGETATIVE PHASE 1 (LOV1); NAC domain containing protein 35 (NAC035); FUNCTIONS IN: sequence-specific DNA binding transcription factor activity; INVOLVED IN: multicellular organismal development, regulation of transcription; LOCATED IN: cellular_component unknown; EXPRESSED IN: 18 plant structures; EXPRESSED DURING: 12 growth stages; CONTAINS InterPro DOMAIN/s: No apical meristem (NAM) prote…	NAC domain	NO
AT2G02450	9	2:650396-650500	+	RI	0.76989	0.47344	0.29645	0.994	K1	1	NAC domain containing protein 35	LONG VEGETATIVE PHASE 1 (LOV1); NAC domain containing protein 35 (NAC035); FUNCTIONS IN: sequence-specific DNA binding transcription factor activity; INVOLVED IN: multicellular organismal development, regulation of transcription; LOCATED IN: cellular_component unknown; EXPRESSED IN: 18 plant structures; EXPRESSED DURING: 12 growth stages; CONTAINS InterPro DOMAIN/s: No apical meristem (NAM) prote…	NAC domain	NO
AT2G02570	6	2:699657-699812	-	AA	0.36425	0.55004	-0.18578	0.979	K2	1.3638	nucleic acid binding;RNA binding	nucleic acid binding;RNA binding; FUNCTIONS IN: RNA binding, nucleic acid binding; INVOLVED IN: mRNA processing; LOCATED IN: nucleus, cytoplasm; EXPRESSED IN: 24 plant structures; EXPRESSED DURING: 14 growth stages; CONTAINS InterPro DOMAIN/s: Tudor subgroup (InterPro:IPR018351), Tudor domain (InterPro:IPR002999), Survival motor neuron (InterPro:IPR010304)	Survival motor neuron | Tudor domain	NO
AT2G02570	23	2:698192-698325	-	RI	0.8414	0.45331	0.3881	1	K2	1.086	nucleic acid binding;RNA binding	nucleic acid binding;RNA binding; FUNCTIONS IN: RNA binding, nucleic acid binding; INVOLVED IN: mRNA processing; LOCATED IN: nucleus, cytoplasm; EXPRESSED IN: 24 plant structures; EXPRESSED DURING: 14 growth stages; CONTAINS InterPro DOMAIN/s: Tudor subgroup (InterPro:IPR018351), Tudor domain (InterPro:IPR002999), Survival motor neuron (InterPro:IPR010304)	Survival motor neuron | Tudor domain	NO
AT2G02570	6	2:699813-700246	-	RI	0.2869	0.46266	-0.17576	0.994	K2	1.3663	nucleic acid binding;RNA binding	nucleic acid binding;RNA binding; FUNCTIONS IN: RNA binding, nucleic acid binding; INVOLVED IN: mRNA processing; LOCATED IN: nucleus, cytoplasm; EXPRESSED IN: 24 plant structures; EXPRESSED DURING: 14 growth stages; CONTAINS InterPro DOMAIN/s: Tudor subgroup (InterPro:IPR018351), Tudor domain (InterPro:IPR002999), Survival motor neuron (InterPro:IPR010304)	Survival motor neuron | Tudor domain	NO
AT2G02765	19	2:775897-775927	-	AA	0.83065	0.94645	-0.1158	0.938	K2	1.3075	L-aminoadipate-semialdehyde dehydrogenase-phosphopantetheinyl transferase;(source:Araport11)			NO
AT2G02765	3	2:777562-777576	-	CE	0.48414	0.65041	-0.16627	0.95	K4	2.627	L-aminoadipate-semialdehyde dehydrogenase-phosphopantetheinyl transferase;(source:Araport11)			NO
AT2G02765	5	2:777548-777561	-	EI/RI	0.46484	0.63297	-0.16813	0.968	K5	3.1952	L-aminoadipate-semialdehyde dehydrogenase-phosphopantetheinyl transferase;(source:Araport11)			NO
AT2G02765	5	2:777548-777561	-	RI	0.46484	0.63297	-0.16813	0.968	K5	3.1952	L-aminoadipate-semialdehyde dehydrogenase-phosphopantetheinyl transferase;(source:Araport11)			NO
AT2G03530	11	2:1072910-1072958	+	AA	0.79207	0.89778	-0.10571	0.937	K2	1.3665	ureide permease 2	ureide permease 2 (UPS2); FUNCTIONS IN: uracil:cation symporter activity; LOCATED IN: plasma membrane; EXPRESSED IN: 25 plant structures; EXPRESSED DURING: 10 growth stages; BEST Arabidopsis thaliana protein match is: ureide permease 1 (TAIR:AT2G03590.1)	Ureide permease	NO
AT2G04540	22	2:1582118-1582178	-	CE	0.87158	0.97217	-0.1006	0.99	K2	1.411	Beta-ketoacyl synthase	Beta-ketoacyl synthase; FUNCTIONS IN: transferase activity, transferring acyl groups other than amino-acyl groups, fatty acid synthase activity, catalytic activity; INVOLVED IN: biosynthetic process, fatty acid biosynthetic process, metabolic process; LOCATED IN: mitochondrion; EXPRESSED IN: 23 plant structures; EXPRESSED DURING: 13 growth stages; CONTAINS InterPro DOMAIN/s: Beta-ketoacyl synthas…	3-oxoacyl-[acyl-carrier-protein] synthase 2 | Beta-ketoacyl synthase, C-terminal | Beta-ketoacyl synthase, N-terminal | Beta-ketoacyl synthase, active site | Thiolase-like | Thiolase-like, subgroup	NO
AT2G04740	5	2:1658721-1658809	+	RI	0.32882	0.17988	0.14894	0.922	K1	0.9647	ankyrin repeat family protein	ankyrin repeat family protein; CONTAINS InterPro DOMAIN/s: BTB/POZ (InterPro:IPR013069), BTB/POZ fold (InterPro:IPR011333), Ankyrin repeat-containing domain (InterPro:IPR020683), Kelch related (InterPro:IPR013089), BTB/POZ-like (InterPro:IPR000210)	Ankyrin repeat | Ankyrin repeat-containing domain | BTB/POZ | BTB/POZ fold | BTB/POZ-like	NO
AT2G04790	8	2:1679917-1680014	+	RI	0.048324	0.14841	-0.10009	0.999	K3	1.9411		unknown protein; FUNCTIONS IN: molecular_function unknown; INVOLVED IN: biological_process unknown; EXPRESSED IN: 17 plant structures; EXPRESSED DURING: 11 growth stages		NO
AT2G05160	16	2:1859696-1859787	-	EI/RI	0.87926	0.66668	0.21258	0.983	K1	0.9412	CCCH-type zinc fingerfamily protein with RNA-binding domain	CCCH-type zinc fingerfamily protein with RNA-binding domain; FUNCTIONS IN: RNA binding, nucleotide binding, zinc ion binding, nucleic acid binding; INVOLVED IN: biological_process unknown; LOCATED IN: cellular_component unknown; EXPRESSED IN: 6 plant structures; EXPRESSED DURING: 4 anthesis, petal differentiation and expansion stage; CONTAINS InterPro DOMAIN/s: Zinc finger, CCCH-type (InterPro:IP…	Nucleotide-binding, alpha-beta plait | OST-HTH/LOTUS domain | RNA recognition motif domain | Zinc finger, CCCH-type	NO
AT2G05160	16	2:1859696-1859787	-	RI	0.87926	0.66668	0.21258	0.983	K1	0.9412	CCCH-type zinc fingerfamily protein with RNA-binding domain	CCCH-type zinc fingerfamily protein with RNA-binding domain; FUNCTIONS IN: RNA binding, nucleotide binding, zinc ion binding, nucleic acid binding; INVOLVED IN: biological_process unknown; LOCATED IN: cellular_component unknown; EXPRESSED IN: 6 plant structures; EXPRESSED DURING: 4 anthesis, petal differentiation and expansion stage; CONTAINS InterPro DOMAIN/s: Zinc finger, CCCH-type (InterPro:IP…	Nucleotide-binding, alpha-beta plait | OST-HTH/LOTUS domain | RNA recognition motif domain | Zinc finger, CCCH-type	NO
AT2G05185	9	2:1877798-1877937	+	RI	0.73785	0.91336	-0.17551	0.988	K2	1.3034		unknown protein; FUNCTIONS IN: molecular_function unknown; INVOLVED IN: biological_process unknown; LOCATED IN: chloroplast; BEST Arabidopsis thaliana protein match is: unknown protein (TAIR:AT5G22608.1); BEST Arabidopsis thaliana protein match is: unknown protein (TAIR:AT5G22608.3)		NO
AT2G05210	17	2:1892680-1892707	+	AD	0.16339	0.30215	-0.13876	0.939	K2	0.9052	Nucleic acid-binding, OB-fold-like protein	Protection of Telomeres 1a (AtPOT1a); CONTAINS InterPro DOMAIN/s: Nucleic acid-binding, OB-fold-like (InterPro:IPR016027), Nucleic acid-binding, OB-fold (InterPro:IPR012340), Telomere end binding protein (InterPro:IPR011564); BEST Arabidopsis thaliana protein match is: Nucleic acid-binding, OB-fold-like protein (TAIR:AT5G06310.1)	Nucleic acid-binding, OB-fold | Protection of telomeres protein 1 | Telomeric single stranded DNA binding POT1/Cdc13	NO
AT2G05210	22	2:1892708-1892832	+	RI	0.1395	0.30074	-0.16124	0.953	K2	0.9933	Nucleic acid-binding, OB-fold-like protein	Protection of Telomeres 1a (AtPOT1a); CONTAINS InterPro DOMAIN/s: Nucleic acid-binding, OB-fold-like (InterPro:IPR016027), Nucleic acid-binding, OB-fold (InterPro:IPR012340), Telomere end binding protein (InterPro:IPR011564); BEST Arabidopsis thaliana protein match is: Nucleic acid-binding, OB-fold-like protein (TAIR:AT5G06310.1)	Nucleic acid-binding, OB-fold | Protection of telomeres protein 1 | Telomeric single stranded DNA binding POT1/Cdc13	NO
AT2G05440	8	2:1993745-1993765	+	CE	0.96481	0.85993	0.10488	0.901	K5	2.8126	GLYCINE RICH PROTEIN 9	GLYCINE RICH PROTEIN 9 (GRP9); FUNCTIONS IN: molecular_function unknown; INVOLVED IN: biological_process unknown; LOCATED IN: endomembrane system; CONTAINS InterPro DOMAIN/s: Glycine rich protein (InterPro:IPR010800); BEST Arabidopsis thaliana protein match is: Glycine-rich protein family (TAIR:AT2G05510.1); BEST Arabidopsis thaliana protein match is: Glycine-rich protein family (TAIR:AT2G05510.2…	Glycine rich protein	NO
AT2G05518	4	2:2023458-2023544	+	RI	0.42793	0.61696	-0.18904	0.969	K3	1.9971	other_RNA;(source:Araport11)			NO
AT2G05518	7	2:2023677-2023779	+	RI	0.38292	0.63109	-0.24818	0.981	K3	1.9971	other_RNA;(source:Araport11)			NO
AT2G06005	14	2:2333688-2333737	+	CE	0.85902	0.96581	-0.10678	0.982	K2	1.0618	FRIGIDA interacting protein 1	FRIGIDA interacting protein 1 (FIP1); FUNCTIONS IN: protein binding; INVOLVED IN: biological_process unknown; LOCATED IN: endomembrane system; EXPRESSED IN: stem, male gametophyte, flower, pollen tube; EXPRESSED DURING: L mature pollen stage, M germinated pollen stage, 4 anthesis; BEST Arabidopsis thaliana protein match is: unknown protein (TAIR:AT5G20580.2)	TMEM192 family	NO
AT2G06025	20	2:2351448-2351548	+	AD	0.80215	0.91238	-0.11023	0.996	K2	1.3068	Acyl-CoA N-acyltransferases (NAT) superfamily protein	Acyl-CoA N-acyltransferases (NAT) superfamily protein; FUNCTIONS IN: N-acetyltransferase activity; INVOLVED IN: metabolic process; LOCATED IN: cellular_component unknown; CONTAINS InterPro DOMAIN/s: GCN5-related N-acetyltransferase, C-terminal (InterPro:IPR022610), GCN5-related N-acetyltransferase (InterPro:IPR000182), Acyl-CoA N-acyltransferase (InterPro:IPR016181); BEST Arabidopsis thaliana pro…	Acyl-CoA N-acyltransferase | GNAT domain	NO
AT2G07042	12	2:2920648-2920973	-	RI	0.15636	0.28386	-0.1275	0.901	K6	3.8344	other RNA			NO
AT2G09800	2	2:3672126-3672205	+	RI	0.71997	0.42832	0.29165	1	K1	0.9885	transposable element gene	copia-like retrotransposon family, has a 1.8e-162 P-value blast match to GB:AAA57005 Hopscotch polyprotein (Ty1_Copia-element) (Zea mays)		NO
AT2G11000	29	2:4343320-4343372	-	CE	0.4083	0.22257	0.18572	0.94	K3	1.5468	MAK10 homologue	MAK10 homologue (MAK10); FUNCTIONS IN: acetyltransferase activity; INVOLVED IN: biological_process unknown; LOCATED IN: cellular_component unknown; EXPRESSED IN: 23 plant structures; EXPRESSED DURING: 13 growth stages; CONTAINS InterPro DOMAIN/s: Mak10 subunit, NatC N(alpha)-terminal acetyltransferase (InterPro:IPR007244)	NatC N(alpha)-terminal acetyltransferase, Mak10 subunit	NO
AT2G11240	4	2:4483179-4483280	-	RI	0.40577	0.29355	0.11222	1	K1	0.9782	transposable element gene	non-LTR retrotransposon family (LINE), has a 1.1e-38 P-value blast match to GB:NP_038603 L1 repeat, Tf subfamily, member 23 (LINE-element) (Mus musculus)		NO
AT2G11910	3	2:4807167-4807276	-	RI	0.58733	0.74843	-0.1611	1	K1	0.9907		unknown protein; FUNCTIONS IN: molecular_function unknown; INVOLVED IN: biological_process unknown; LOCATED IN: chloroplast envelope; EXPRESSED IN: 22 plant structures; EXPRESSED DURING: 13 growth stages		NO
AT2G12170	11	2:4890317-4890433	-	RI	0.10838	0.37368	-0.2653	0.967	K1	0.9612		BEST Arabidopsis thaliana protein match is: Transcriptional factor B3 family protein (TAIR:AT2G24645.1)		NO
AT2G14285	9	2:6053528-6053537	-	AA	0.79129	0.91207	-0.12078	1	K5	2.0281	Small nuclear ribonucleoprotein family protein	Small nuclear ribonucleoprotein family protein; CONTAINS InterPro DOMAIN/s: Small nuclear ribonucleoprotein SmF (InterPro:IPR016487), Like-Sm ribonucleoprotein (LSM) domain (InterPro:IPR001163), Like-Sm ribonucleoprotein (LSM) domain, eukaryotic/archaea-type (InterPro:IPR006649), Like-Sm ribonucleoprotein (LSM)-related domain (InterPro:IPR010920); BEST Arabidopsis thaliana protein match is: small…		NO
AT2G14285	10	2:6053488-6053527	-	CE	0.84789	0.96342	-0.11553	1	K5	2.0281	Small nuclear ribonucleoprotein family protein	Small nuclear ribonucleoprotein family protein; CONTAINS InterPro DOMAIN/s: Small nuclear ribonucleoprotein SmF (InterPro:IPR016487), Like-Sm ribonucleoprotein (LSM) domain (InterPro:IPR001163), Like-Sm ribonucleoprotein (LSM) domain, eukaryotic/archaea-type (InterPro:IPR006649), Like-Sm ribonucleoprotein (LSM)-related domain (InterPro:IPR010920); BEST Arabidopsis thaliana protein match is: small…		NO
AT2G15000	4	2:6481828-6481870	-	AD	0.23697	0.1179	0.11907	0.95	K3	1.2735		unknown protein; FUNCTIONS IN: molecular_function unknown; INVOLVED IN: biological_process unknown; LOCATED IN: chloroplast; EXPRESSED IN: 22 plant structures; EXPRESSED DURING: 13 growth stages; BEST Arabidopsis thaliana protein match is: unknown protein (TAIR:AT4G34265.1); BEST Arabidopsis thaliana protein match is: unknown protein (TAIR:AT4G34265.2)		NO
AT2G15050	2	2:6519226-6519246	+	AD	0.56382	0.44832	0.1155	0.936	K2	1.2404	lipid transfer protein	lipid transfer protein (LTP); FUNCTIONS IN: lipid binding; INVOLVED IN: lipid transport; LOCATED IN: endomembrane system; EXPRESSED IN: 20 plant structures; EXPRESSED DURING: 13 growth stages; CONTAINS InterPro DOMAIN/s: Bifunctional inhibitor/plant lipid transfer protein/seed storage (InterPro:IPR016140), Plant lipid transfer protein/seed storage/trypsin-alpha amylase inhibitor (InterPro:IPR0036…	Bifunctional inhibitor/plant lipid transfer protein/seed storage helical domain | Plant lipid transfer protein/Par allergen	NO
AT2G16940	31	2:7345080-7345091	-	AA	0.95933	0.79188	0.16745	1	K2	1.1135	Splicing factor, CC1-like	Splicing factor, CC1-like; FUNCTIONS IN: RNA binding, nucleotide binding, nucleic acid binding; INVOLVED IN: mRNA processing; LOCATED IN: nucleus; EXPRESSED IN: 23 plant structures; EXPRESSED IN: 24 plant structures; EXPRESSED DURING: 13 growth stages; CONTAINS InterPro DOMAIN/s: RNA recognition motif, RNP-1 (InterPro:IPR000504), Splicing factor, CC1-like (InterPro:IPR006509), Nucleotide-binding,…	Nucleotide-binding, alpha-beta plait | RNA recognition motif domain | Splicing factor RBM39, linker | Splicing factor, RBM39-like	NO
AT2G16940	30	2:7345092-7345124	-	AA	0.95656	0.77953	0.17704	1	K2	1.1135	Splicing factor, CC1-like	Splicing factor, CC1-like; FUNCTIONS IN: RNA binding, nucleotide binding, nucleic acid binding; INVOLVED IN: mRNA processing; LOCATED IN: nucleus; EXPRESSED IN: 23 plant structures; EXPRESSED IN: 24 plant structures; EXPRESSED DURING: 13 growth stages; CONTAINS InterPro DOMAIN/s: RNA recognition motif, RNP-1 (InterPro:IPR000504), Splicing factor, CC1-like (InterPro:IPR006509), Nucleotide-binding,…	Nucleotide-binding, alpha-beta plait | RNA recognition motif domain | Splicing factor RBM39, linker | Splicing factor, RBM39-like	NO
AT2G16940	29	2:7345125-7345197	-	AA	0.94985	0.75177	0.19808	1	K2	1.1135	Splicing factor, CC1-like	Splicing factor, CC1-like; FUNCTIONS IN: RNA binding, nucleotide binding, nucleic acid binding; INVOLVED IN: mRNA processing; LOCATED IN: nucleus; EXPRESSED IN: 23 plant structures; EXPRESSED IN: 24 plant structures; EXPRESSED DURING: 13 growth stages; CONTAINS InterPro DOMAIN/s: RNA recognition motif, RNP-1 (InterPro:IPR000504), Splicing factor, CC1-like (InterPro:IPR006509), Nucleotide-binding,…	Nucleotide-binding, alpha-beta plait | RNA recognition motif domain | Splicing factor RBM39, linker | Splicing factor, RBM39-like	NO
AT2G16940	17	2:7346139-7346177	-	CE	0.28987	0.56304	-0.27317	1	K5	2.1268	Splicing factor, CC1-like	Splicing factor, CC1-like; FUNCTIONS IN: RNA binding, nucleotide binding, nucleic acid binding; INVOLVED IN: mRNA processing; LOCATED IN: nucleus; EXPRESSED IN: 23 plant structures; EXPRESSED IN: 24 plant structures; EXPRESSED DURING: 13 growth stages; CONTAINS InterPro DOMAIN/s: RNA recognition motif, RNP-1 (InterPro:IPR000504), Splicing factor, CC1-like (InterPro:IPR006509), Nucleotide-binding,…	Nucleotide-binding, alpha-beta plait | RNA recognition motif domain | Splicing factor RBM39, linker | Splicing factor, RBM39-like	NO
AT2G16940	22	2:7345968-7345985	-	CE	0.32293	0.56176	-0.23883	1	K5	2.1268	Splicing factor, CC1-like	Splicing factor, CC1-like; FUNCTIONS IN: RNA binding, nucleotide binding, nucleic acid binding; INVOLVED IN: mRNA processing; LOCATED IN: nucleus; EXPRESSED IN: 23 plant structures; EXPRESSED IN: 24 plant structures; EXPRESSED DURING: 13 growth stages; CONTAINS InterPro DOMAIN/s: RNA recognition motif, RNP-1 (InterPro:IPR000504), Splicing factor, CC1-like (InterPro:IPR006509), Nucleotide-binding,…	Nucleotide-binding, alpha-beta plait | RNA recognition motif domain | Splicing factor RBM39, linker | Splicing factor, RBM39-like	NO
AT2G16940	24	2:7345777-7345945	-	RI	0.27262	0.51168	-0.23906	1	K5	2.1273	Splicing factor, CC1-like	Splicing factor, CC1-like; FUNCTIONS IN: RNA binding, nucleotide binding, nucleic acid binding; INVOLVED IN: mRNA processing; LOCATED IN: nucleus; EXPRESSED IN: 23 plant structures; EXPRESSED IN: 24 plant structures; EXPRESSED DURING: 13 growth stages; CONTAINS InterPro DOMAIN/s: RNA recognition motif, RNP-1 (InterPro:IPR000504), Splicing factor, CC1-like (InterPro:IPR006509), Nucleotide-binding,…	Nucleotide-binding, alpha-beta plait | RNA recognition motif domain | Splicing factor RBM39, linker | Splicing factor, RBM39-like	NO
AT2G16990	48	2:7387605-7387690	+	RI	0.32651	0.18143	0.14507	0.939	K3	2.2057	Major facilitator superfamily protein	Major facilitator superfamily protein; FUNCTIONS IN: tetracycline transporter activity; INVOLVED IN: transmembrane transport; LOCATED IN: endomembrane system; EXPRESSED IN: 22 plant structures; EXPRESSED DURING: 13 growth stages; CONTAINS InterPro DOMAIN/s: Major facilitator superfamily MFS-1 (InterPro:IPR011701), Major facilitator superfamily, general substrate transporter (InterPro:IPR016196); …	Major facilitator superfamily | Major facilitator superfamily domain, general substrate transporter	NO
AT2G17442	14	2:7574826-7574875	-	CE	0.62405	0.91043	-0.28637	0.923	K3	2.4578		unknown protein; FUNCTIONS IN: molecular_function unknown; INVOLVED IN: biological_process unknown; LOCATED IN: mitochondrion		NO
AT2G17510	27	2:7612688-7612961	-	RI	0.16246	0.020002	0.14246	1	K1	0.6543	ribonuclease II family protein	EMBRYO DEFECTIVE 2763 (EMB2763); FUNCTIONS IN: ribonuclease activity, RNA binding; LOCATED IN: endomembrane system; EXPRESSED IN: 22 plant structures; EXPRESSED DURING: 13 growth stages; CONTAINS InterPro DOMAIN/s: Nucleotide binding protein, PINc (InterPro:IPR006596), Ribonuclease II/R (InterPro:IPR001900); BEST Arabidopsis thaliana protein match is: Ribonuclease II/R family protein (TAIR:AT1G77…	Nucleic acid-binding, OB-fold | PIN domain | PIN domain-like | Ribonuclease II/R, conserved site	NO
AT2G17530	7	2:7627617-7627692	+	EI/RI	0.97944	0.87093	0.1085	0.997	K1	0.5705	Protein kinase superfamily protein	Protein kinase superfamily protein; FUNCTIONS IN: protein serine/threonine kinase activity, protein kinase activity, kinase activity, ATP binding; INVOLVED IN: protein amino acid phosphorylation; LOCATED IN: cellular_component unknown; EXPRESSED IN: 24 plant structures; EXPRESSED DURING: 15 growth stages; CONTAINS InterPro DOMAIN/s: Protein kinase, ATP binding site (InterPro:IPR017441), Protein k…	Protein kinase domain | Protein kinase, ATP binding site | Protein kinase-like domain | Serine/threonine-protein kinase, active site	NO
AT2G17530	7	2:7627617-7627692	+	RI	0.97944	0.87093	0.1085	0.997	K1	0.5705	Protein kinase superfamily protein	Protein kinase superfamily protein; FUNCTIONS IN: protein serine/threonine kinase activity, protein kinase activity, kinase activity, ATP binding; INVOLVED IN: protein amino acid phosphorylation; LOCATED IN: cellular_component unknown; EXPRESSED IN: 24 plant structures; EXPRESSED DURING: 15 growth stages; CONTAINS InterPro DOMAIN/s: Protein kinase, ATP binding site (InterPro:IPR017441), Protein k…	Protein kinase domain | Protein kinase, ATP binding site | Protein kinase-like domain | Serine/threonine-protein kinase, active site	NO
AT2G17580	16	2:7647427-7647434	+	AA	0.7622	0.94415	-0.18195	0.957	K1	0.8453	Polynucleotide adenylyltransferase family protein	Polynucleotide adenylyltransferase family protein; FUNCTIONS IN: RNA binding, nucleotidyltransferase activity; INVOLVED IN: RNA processing; LOCATED IN: chloroplast; EXPRESSED IN: 16 plant structures; EXPRESSED DURING: 8 growth stages; CONTAINS InterPro DOMAIN/s: Poly A polymerase, head domain (InterPro:IPR002646); BEST Arabidopsis thaliana protein match is: Polynucleotide adenylyltransferase fami…	Poly A polymerase, head domain	NO
AT2G17640	8	2:7669065-7669130	-	AA	0.37837	0.48967	-0.1113	0.903	K2	1.4626	Trimeric LpxA-like enzymes superfamily protein	ATSERAT3;1; CONTAINS InterPro DOMAIN/s: Hexapeptide transferase, conserved site (InterPro:IPR018357), Serine O-acetyltransferase (InterPro:IPR005881), Trimeric LpxA-like (InterPro:IPR011004), Serine acetyltransferase, N-terminal (InterPro:IPR010493); BEST Arabidopsis thaliana protein match is: serine acetyltransferase 3;2 (TAIR:AT4G35640.1)	Bacterial transferase hexapeptide repeat | Hexapeptide transferase, conserved site | Serine O-acetyltransferase | Serine acetyltransferase, N-terminal | Trimeric LpxA-like	NO
AT2G17780	20	2:7725214-7725216	-	AA	0.27186	0.14508	0.12677	0.912	K2	1.2266	PLAC8 family protein	mid1-complementing activity 2 (MCA2); BEST Arabidopsis thaliana protein match is: PLAC8 family protein (TAIR:AT4G35920.2); CONTAINS InterPro DOMAIN/s: Protein of unknown function Cys-rich (InterPro:IPR006461)	Uncharacterised protein family Cys-rich	NO
AT2G17900	12	2:7775836-7775924	-	RI	0.47333	0.10698	0.36636	0.995	K1	0.9977	SET domain group 37	SET domain group 37 (SDG37); FUNCTIONS IN: zinc ion binding; INVOLVED IN: biological_process unknown; EXPRESSED IN: 11 plant structures; EXPRESSED DURING: 6 growth stages; CONTAINS InterPro DOMAIN/s: Zinc finger, MYND-type (InterPro:IPR002893), SET domain (InterPro:IPR001214); BEST Arabidopsis thaliana protein match is: histone-lysine N-methyltransferase ATXR2 (TAIR:AT3G21820.1)	SET domain | Zinc finger, MYND-type	NO
AT2G17970	10	2:7820932-7820972	-	CE	0.23137	0.68032	-0.44895	0.973	K3	2.265	2-oxoglutarate (2OG) and Fe(II)-dependent oxygenase superfamily protein	2-oxoglutarate (2OG) and Fe(II)-dependent oxygenase superfamily protein; FUNCTIONS IN: oxidoreductase activity; INVOLVED IN: biological_process unknown; LOCATED IN: cellular_component unknown; EXPRESSED IN: 15 plant structures; EXPRESSED DURING: 7 growth stages; CONTAINS InterPro DOMAIN/s: Oxoglutarate/iron-dependent oxygenase (InterPro:IPR005123); BEST Arabidopsis thaliana protein match is: oxid…	Alpha-ketoglutarate-dependent dioxygenase AlkB-like | Oxoglutarate/iron-dependent dioxygenase	NO
AT2G17970	23	2:7819426-7819511	-	RI	0.23787	0.40113	-0.16326	0.953	K1	0.974	2-oxoglutarate (2OG) and Fe(II)-dependent oxygenase superfamily protein	2-oxoglutarate (2OG) and Fe(II)-dependent oxygenase superfamily protein; FUNCTIONS IN: oxidoreductase activity; INVOLVED IN: biological_process unknown; LOCATED IN: cellular_component unknown; EXPRESSED IN: 15 plant structures; EXPRESSED DURING: 7 growth stages; CONTAINS InterPro DOMAIN/s: Oxoglutarate/iron-dependent oxygenase (InterPro:IPR005123); BEST Arabidopsis thaliana protein match is: oxid…	Alpha-ketoglutarate-dependent dioxygenase AlkB-like | Oxoglutarate/iron-dependent dioxygenase	NO
AT2G18050	6	2:7846182-7846253	+	RI	0.51454	0.30501	0.20953	1	K1	0.9997	histone H1-3	histone H1-3 (HIS1-3); FUNCTIONS IN: DNA binding, nucleosomal DNA binding; INVOLVED IN: response to water deprivation, nucleosome assembly, response to abscisic acid stimulus; LOCATED IN: nucleus, nucleosome; EXPRESSED IN: 14 plant structures; EXPRESSED DURING: 7 growth stages; CONTAINS InterPro DOMAIN/s: Winged helix-turn-helix transcription repressor DNA-binding (InterPro:IPR011991), Histone H1…	Histone H5 | Linker histone H1/H5, domain H15 | Winged helix-turn-helix DNA-binding domain	NO
AT2G18230	17	2:7932345-7932435	-	RI	0.13653	0.010242	0.12629	1	K1	0.6229	pyrophosphorylase 2	pyrophosphorylase 2 (PPa2); FUNCTIONS IN: inorganic diphosphatase activity, pyrophosphatase activity; INVOLVED IN: phosphate metabolic process, metabolic process; LOCATED IN: membrane, cytoplasm; EXPRESSED IN: 22 plant structures; EXPRESSED DURING: 14 growth stages; CONTAINS InterPro DOMAIN/s: Inorganic pyrophosphatase (InterPro:IPR008162); BEST Arabidopsis thaliana protein match is: pyrophosphor…	Inorganic pyrophosphatase	NO
AT2G18245	5	2:7937986-7938099	+	RI	0.065394	0.23466	-0.16926	0.981	K2	1.3444	alpha/beta-Hydrolases superfamily protein	alpha/beta-Hydrolases superfamily protein; CONTAINS InterPro DOMAIN/s: Protein of unknown function DUF829, transmembrane 53 (InterPro:IPR008547); BEST Arabidopsis thaliana protein match is: alpha/beta-Hydrolases superfamily protein (TAIR:AT3G19970.1)	Alpha/Beta hydrolase fold | Protein of unknown function DUF829, TMEM53	NO
AT2G19260	6	2:8357475-8357620	+	EI/RI	0.97458	0.85227	0.12231	0.936	K1	0.8113	RING/FYVE/PHD zinc finger superfamily protein	RING/FYVE/PHD zinc finger superfamily protein; FUNCTIONS IN: DNA binding, zinc ion binding; INVOLVED IN: regulation of transcription, DNA-dependent; LOCATED IN: cellular_component unknown; CONTAINS InterPro DOMAIN/s: Zinc finger, PHD-type, conserved site (InterPro:IPR019786), Zinc finger, PHD-type (InterPro:IPR001965), Zinc finger, FYVE/PHD-type (InterPro:IPR011011), Zinc finger, CW-type (InterPr…	Zinc finger, CW-type | Zinc finger, FYVE/PHD-type | Zinc finger, PHD-finger | Zinc finger, PHD-type | Zinc finger, PHD-type, conserved site | Zinc finger, RING/FYVE/PHD-type	NO
AT2G19260	6	2:8357475-8357620	+	RI	0.97458	0.85227	0.12231	0.936	K1	0.8113	RING/FYVE/PHD zinc finger superfamily protein	RING/FYVE/PHD zinc finger superfamily protein; FUNCTIONS IN: DNA binding, zinc ion binding; INVOLVED IN: regulation of transcription, DNA-dependent; LOCATED IN: cellular_component unknown; CONTAINS InterPro DOMAIN/s: Zinc finger, PHD-type, conserved site (InterPro:IPR019786), Zinc finger, PHD-type (InterPro:IPR001965), Zinc finger, FYVE/PHD-type (InterPro:IPR011011), Zinc finger, CW-type (InterPr…	Zinc finger, CW-type | Zinc finger, FYVE/PHD-type | Zinc finger, PHD-finger | Zinc finger, PHD-type | Zinc finger, PHD-type, conserved site | Zinc finger, RING/FYVE/PHD-type	NO
AT2G19930	21	2:8610133-8610245	-	RI	0.71757	0.47638	0.24119	0.912	K3	1.9539	RNA-dependent RNA polymerase family protein	RNA-dependent RNA polymerase family protein; FUNCTIONS IN: RNA-directed RNA polymerase activity; INVOLVED IN: posttranscriptional gene silencing; LOCATED IN: cellular_component unknown; EXPRESSED IN: 14 plant structures; EXPRESSED DURING: 6 growth stages; CONTAINS InterPro DOMAIN/s: RNA-dependent RNA polymerase, eukaryotic-type (InterPro:IPR007855); BEST Arabidopsis thaliana protein match is: RNA…	RNA-dependent RNA polymerase, eukaryotic-type	NO
AT2G20250	20	2:8734408-8734487	-	EI/RI	0.9303	0.78467	0.14563	0.914	K1	0.874		unknown protein		NO
AT2G20250	22	2:8734164-8734242	-	RI	0.71708	0.41493	0.30215	0.953	K1	0.9997		unknown protein		NO
AT2G20250	20	2:8734408-8734487	-	RI	0.9303	0.78467	0.14563	0.914	K1	0.874		unknown protein		NO
AT2G20290	33	2:8745581-8745625	-	CE	0.4449	0.76338	-0.31847	1	K1	0.9931	myosin-like protein XIG	myosin-like protein XIG (XIG); FUNCTIONS IN: motor activity; INVOLVED IN: actin filament-based movement; LOCATED IN: endomembrane system, myosin complex; EXPRESSED IN: 23 plant structures; EXPRESSED DURING: 13 growth stages; CONTAINS InterPro DOMAIN/s: Dil domain (InterPro:IPR018444), Dilute (InterPro:IPR002710), Myosin, N-terminal, SH3-like (InterPro:IPR004009), Myosin head, motor domain (InterP…	Dil domain | Dilute | IQ motif, EF-hand binding site | Myosin head, motor domain | Myosin, N-terminal, SH3-like | P-loop containing nucleoside triphosphate hydrolase	NO
AT2G20635	5	2:8900710-8900876	+	RI	0.14831	0.43955	-0.29124	0.911	K1	0.9852	ATP binding;protein kinases;protein serine/threonine kinases	ATP binding;protein kinases;protein serine/threonine kinases; FUNCTIONS IN: protein serine/threonine kinase activity, protein kinase activity, ATP binding; INVOLVED IN: protein amino acid phosphorylation; LOCATED IN: cellular_component unknown; CONTAINS InterPro DOMAIN/s: Mitotic checkpoint serine/threonine protein kinase, Bub1 (InterPro:IPR015661), Protein kinase, catalytic domain (InterPro:IPR0…	Mad3/BUB1 homology region 1 | Mitotic checkpoint serine/threonine protein kinase Bub1/Mitotic spindle checkpoint component Mad3 | Protein kinase domain | Protein kinase-like domain | Serine/threonine-protein kinase, active site	NO
AT2G20815	3	2:8960042-8960128	+	EI/RI	0.83569	0.53851	0.29718	0.971	K1	0.994	Family of unknown function (DUF566)	Family of unknown function (DUF566) ; FUNCTIONS IN: molecular_function unknown; INVOLVED IN: biological_process unknown; CONTAINS InterPro DOMAIN/s: Protein of unknown function DUF566 (InterPro:IPR007573); LOCATED IN: chloroplast; BEST Arabidopsis thaliana protein match is: Family of unknown function (DUF566) (TAIR:AT2G20616.1)	Protein of unknown function DUF566	NO
AT2G20815	3	2:8960042-8960128	+	RI	0.83569	0.53851	0.29718	0.971	K1	0.994	Family of unknown function (DUF566)	Family of unknown function (DUF566) ; FUNCTIONS IN: molecular_function unknown; INVOLVED IN: biological_process unknown; CONTAINS InterPro DOMAIN/s: Protein of unknown function DUF566 (InterPro:IPR007573); LOCATED IN: chloroplast; BEST Arabidopsis thaliana protein match is: Family of unknown function (DUF566) (TAIR:AT2G20616.1)	Protein of unknown function DUF566	NO
AT2G20960	19	2:9007973-9007989	+	EI/CE	0.94912	0.84881	0.1003	0.96	K5	2.0252	Arabidopsis phospholipase-like protein (PEARLI 4) family	pEARLI4; CONTAINS InterPro DOMAIN/s: Phospholipase-like, arabidopsis (InterPro:IPR007942); BEST Arabidopsis thaliana protein match is: Arabidopsis phospholipase-like protein (PEARLI 4) family (TAIR:AT4G38560.1)	Phospholipase-like	NO
AT2G21188	2	2:9079226-9079352	-	RI	0.79107	0.66642	0.12465	0.908	K1	0.9612	other RNA			NO
AT2G21500	13	2:9207887-9207960	-	RI	0.76455	0.38542	0.37913	0.913	K1	0.9612	RING/U-box superfamily protein	RING/U-box superfamily protein; FUNCTIONS IN: zinc ion binding; LOCATED IN: plasma membrane; EXPRESSED IN: cultured cell; CONTAINS InterPro DOMAIN/s: Zinc finger, RING-type (InterPro:IPR001841); BEST Arabidopsis thaliana protein match is: RING/U-box superfamily protein (TAIR:AT4G39140.5)	Zinc finger, RING-type | Zinc finger, RING/FYVE/PHD-type	NO
AT2G21540	16	2:9221943-9221960	-	CE	0.68294	0.94575	-0.26281	0.998	K1	0.9629	SEC14-like 3	SEC14-like 3 (SFH3); FUNCTIONS IN: phosphatidylinositol transporter activity; INVOLVED IN: flower development, transport; LOCATED IN: intracellular; EXPRESSED IN: 25 plant structures; EXPRESSED DURING: 17 growth stages; CONTAINS InterPro DOMAIN/s: Cellular retinaldehyde-binding/triple function, C-terminal (InterPro:IPR001251), Cellular retinaldehyde-binding/triple function, N-terminal (InterPro:I…	CRAL-TRIO domain | CRAL/TRIO, N-terminal domain | Cellular retinaldehyde binding/alpha-tocopherol transport	NO
AT2G21590	8	2:9238762-9238931	+	AD	0.34375	0.16232	0.18143	0.984	K3	2.1538	Glucose-1-phosphate adenylyltransferase family protein	APL4; CONTAINS InterPro DOMAIN/s: ADP-glucose pyrophosphorylase, conserved site (InterPro:IPR005836), Glucose-1-phosphate adenylyltransferase (InterPro:IPR011831), Nucleotidyl transferase (InterPro:IPR005835); CONTAINS InterPro DOMAIN/s: Glucose-1-phosphate adenylyltransferase (InterPro:IPR011831), ADP-glucose pyrophosphorylase, conserved site (InterPro:IPR005836), Nucleotidyl transferase (InterP…	ADP-glucose pyrophosphorylase, conserved site | Glucose-1-phosphate adenylyltransferase | Nucleotide-diphospho-sugar transferases | Nucleotidyl transferase | Trimeric LpxA-like	NO
AT2G21590	9	2:9238932-9239032	+	RI	0.33463	0.15843	0.1762	0.972	K3	2.1219	Glucose-1-phosphate adenylyltransferase family protein	APL4; CONTAINS InterPro DOMAIN/s: ADP-glucose pyrophosphorylase, conserved site (InterPro:IPR005836), Glucose-1-phosphate adenylyltransferase (InterPro:IPR011831), Nucleotidyl transferase (InterPro:IPR005835); CONTAINS InterPro DOMAIN/s: Glucose-1-phosphate adenylyltransferase (InterPro:IPR011831), ADP-glucose pyrophosphorylase, conserved site (InterPro:IPR005836), Nucleotidyl transferase (InterP…	ADP-glucose pyrophosphorylase, conserved site | Glucose-1-phosphate adenylyltransferase | Nucleotide-diphospho-sugar transferases | Nucleotidyl transferase | Trimeric LpxA-like	NO
AT2G21660	33	2:9265542-9265574	-	EI/RI	0.98698	0.83931	0.14767	0.973	K4	1.5293	cold, circadian rhythm, and rna binding 2	cold, circadian rhythm, and rna binding 2 (CCR2); GLYCINE RICH PROTEIN 7 (ATGRP7); FUNCTIONS IN: double-stranded DNA binding, RNA binding, single-stranded DNA binding; INVOLVED IN: in 12 processes; LOCATED IN: nucleus, chloroplast, peroxisome, cytoplasm; EXPRESSED IN: 27 plant structures; EXPRESSED IN: 28 plant structures; EXPRESSED DURING: 15 growth stages; CONTAINS InterPro DOMAIN/s: RNA recogn…	Nucleotide-binding, alpha-beta plait | RNA recognition motif domain	NO
AT2G21660	33	2:9265542-9265574	-	RI	0.98698	0.83931	0.14767	0.973	K4	1.5293	cold, circadian rhythm, and rna binding 2	cold, circadian rhythm, and rna binding 2 (CCR2); GLYCINE RICH PROTEIN 7 (ATGRP7); FUNCTIONS IN: double-stranded DNA binding, RNA binding, single-stranded DNA binding; INVOLVED IN: in 12 processes; LOCATED IN: nucleus, chloroplast, peroxisome, cytoplasm; EXPRESSED IN: 27 plant structures; EXPRESSED IN: 28 plant structures; EXPRESSED DURING: 15 growth stages; CONTAINS InterPro DOMAIN/s: RNA recogn…	Nucleotide-binding, alpha-beta plait | RNA recognition motif domain	NO
AT2G21830	6	2:9305409-9305491	+	EI/RI	0.616	0.73647	-0.12047	0.912	K1	0.9749	Cysteine/Histidine-rich C1 domain family protein	Cysteine/Histidine-rich C1 domain family protein; FUNCTIONS IN: zinc ion binding; INVOLVED IN: intracellular signaling pathway; EXPRESSED IN: 22 plant structures; EXPRESSED DURING: 12 growth stages; CONTAINS InterPro DOMAIN/s: Protein kinase C-like, phorbol ester/diacylglycerol binding (InterPro:IPR002219), Zinc finger, RING-type (InterPro:IPR001841), Zinc finger, PHD-type (InterPro:IPR001965), C…	C1-like | Protein kinase C-like, phorbol ester/diacylglycerol-binding domain | Zinc finger, PHD-type | Zinc finger, RING-type	NO
AT2G21830	6	2:9305409-9305491	+	RI	0.616	0.73647	-0.12047	0.912	K1	0.9749	Cysteine/Histidine-rich C1 domain family protein	Cysteine/Histidine-rich C1 domain family protein; FUNCTIONS IN: zinc ion binding; INVOLVED IN: intracellular signaling pathway; EXPRESSED IN: 22 plant structures; EXPRESSED DURING: 12 growth stages; CONTAINS InterPro DOMAIN/s: Protein kinase C-like, phorbol ester/diacylglycerol binding (InterPro:IPR002219), Zinc finger, RING-type (InterPro:IPR001841), Zinc finger, PHD-type (InterPro:IPR001965), C…	C1-like | Protein kinase C-like, phorbol ester/diacylglycerol-binding domain | Zinc finger, PHD-type | Zinc finger, RING-type	NO
AT2G22300	4	2:9471390-9471465	+	RI	0.83132	0.59172	0.2396	0.995	K1	0.9911	signal responsive 1	signal responsive 1 (SR1); FUNCTIONS IN: calmodulin binding, transcription regulator activity; INVOLVED IN: response to biotic stimulus; LOCATED IN: nucleus; EXPRESSED IN: 23 plant structures; EXPRESSED DURING: 13 growth stages; CONTAINS InterPro DOMAIN/s: Immunoglobulin E-set (InterPro:IPR014756), Ankyrin repeat-containing domain (InterPro:IPR020683), CG-1 (InterPro:IPR005559), Ankyrin repeat (I…	Ankyrin repeat | Ankyrin repeat-containing domain | CG-1 DNA-binding domain | IQ motif, EF-hand binding site | Immunoglobulin E-set | Immunoglobulin-like fold | P-loop containing nucleoside triphosphate hydrolase	NO
AT2G22730	42	2:9663872-9663960	+	EI/RI	0.23023	0.50201	-0.27178	0.941	K1	0.9968	Major facilitator superfamily protein	Major facilitator superfamily protein; FUNCTIONS IN: carbohydrate transmembrane transporter activity, sugar:hydrogen symporter activity; INVOLVED IN: transmembrane transport; LOCATED IN: membrane; CONTAINS InterPro DOMAIN/s: Major facilitator superfamily (InterPro:IPR020846), Major facilitator superfamily MFS-1 (InterPro:IPR011701), Major facilitator superfamily, general substrate transporter (In…	Major facilitator superfamily | Major facilitator superfamily domain | Major facilitator superfamily domain, general substrate transporter	NO
AT2G22730	42	2:9663872-9663960	+	RI	0.23023	0.50201	-0.27178	0.941	K1	0.9968	Major facilitator superfamily protein	Major facilitator superfamily protein; FUNCTIONS IN: carbohydrate transmembrane transporter activity, sugar:hydrogen symporter activity; INVOLVED IN: transmembrane transport; LOCATED IN: membrane; CONTAINS InterPro DOMAIN/s: Major facilitator superfamily (InterPro:IPR020846), Major facilitator superfamily MFS-1 (InterPro:IPR011701), Major facilitator superfamily, general substrate transporter (In…	Major facilitator superfamily | Major facilitator superfamily domain | Major facilitator superfamily domain, general substrate transporter	NO
AT2G22980	10	2:9779528-9779533	+	AD	0.27248	0.14163	0.13084	1	K2	0.9133	serine carboxypeptidase-like 13	serine carboxypeptidase-like 13 (SCPL13); FUNCTIONS IN: serine-type carboxypeptidase activity; INVOLVED IN: proteolysis; LOCATED IN: endomembrane system; EXPRESSED IN: 23 plant structures; EXPRESSED DURING: 13 growth stages; CONTAINS InterPro DOMAIN/s: Peptidase S10, serine carboxypeptidase (InterPro:IPR001563); BEST Arabidopsis thaliana protein match is: serine carboxypeptidase-like 11 (TAIR:AT2…	Alpha/Beta hydrolase fold | Peptidase S10, serine carboxypeptidase	NO
AT2G22980	23	2:9782048-9782169	+	CE	0.71809	0.93062	-0.21253	0.993	K2	1.2022	serine carboxypeptidase-like 13	serine carboxypeptidase-like 13 (SCPL13); FUNCTIONS IN: serine-type carboxypeptidase activity; INVOLVED IN: proteolysis; LOCATED IN: endomembrane system; EXPRESSED IN: 23 plant structures; EXPRESSED DURING: 13 growth stages; CONTAINS InterPro DOMAIN/s: Peptidase S10, serine carboxypeptidase (InterPro:IPR001563); BEST Arabidopsis thaliana protein match is: serine carboxypeptidase-like 11 (TAIR:AT2…	Alpha/Beta hydrolase fold | Peptidase S10, serine carboxypeptidase	NO
AT2G22980	9	2:9779385-9779450	+	RI	0.73494	0.2409	0.49404	1	K1	0.8436	serine carboxypeptidase-like 13	serine carboxypeptidase-like 13 (SCPL13); FUNCTIONS IN: serine-type carboxypeptidase activity; INVOLVED IN: proteolysis; LOCATED IN: endomembrane system; EXPRESSED IN: 23 plant structures; EXPRESSED DURING: 13 growth stages; CONTAINS InterPro DOMAIN/s: Peptidase S10, serine carboxypeptidase (InterPro:IPR001563); BEST Arabidopsis thaliana protein match is: serine carboxypeptidase-like 11 (TAIR:AT2…	Alpha/Beta hydrolase fold | Peptidase S10, serine carboxypeptidase	NO
AT2G22980	12	2:9779534-9779606	+	RI	0.25857	0.10786	0.15071	1	K2	0.9007	serine carboxypeptidase-like 13	serine carboxypeptidase-like 13 (SCPL13); FUNCTIONS IN: serine-type carboxypeptidase activity; INVOLVED IN: proteolysis; LOCATED IN: endomembrane system; EXPRESSED IN: 23 plant structures; EXPRESSED DURING: 13 growth stages; CONTAINS InterPro DOMAIN/s: Peptidase S10, serine carboxypeptidase (InterPro:IPR001563); BEST Arabidopsis thaliana protein match is: serine carboxypeptidase-like 11 (TAIR:AT2…	Alpha/Beta hydrolase fold | Peptidase S10, serine carboxypeptidase	NO
AT2G22980	17	2:9780144-9780244	+	RI	0.57845	0.7402	-0.16175	1	K3	2.1145	serine carboxypeptidase-like 13	serine carboxypeptidase-like 13 (SCPL13); FUNCTIONS IN: serine-type carboxypeptidase activity; INVOLVED IN: proteolysis; LOCATED IN: endomembrane system; EXPRESSED IN: 23 plant structures; EXPRESSED DURING: 13 growth stages; CONTAINS InterPro DOMAIN/s: Peptidase S10, serine carboxypeptidase (InterPro:IPR001563); BEST Arabidopsis thaliana protein match is: serine carboxypeptidase-like 11 (TAIR:AT2…	Alpha/Beta hydrolase fold | Peptidase S10, serine carboxypeptidase	NO
AT2G22980	19	2:9780268-9780350	+	RI	0.49102	0.26826	0.22276	1	K3	2.1145	serine carboxypeptidase-like 13	serine carboxypeptidase-like 13 (SCPL13); FUNCTIONS IN: serine-type carboxypeptidase activity; INVOLVED IN: proteolysis; LOCATED IN: endomembrane system; EXPRESSED IN: 23 plant structures; EXPRESSED DURING: 13 growth stages; CONTAINS InterPro DOMAIN/s: Peptidase S10, serine carboxypeptidase (InterPro:IPR001563); BEST Arabidopsis thaliana protein match is: serine carboxypeptidase-like 11 (TAIR:AT2…	Alpha/Beta hydrolase fold | Peptidase S10, serine carboxypeptidase	NO
AT2G22980	21	2:9780453-9780816	+	RI	0.1443	0.01389	0.13041	1	K4	2.0584	serine carboxypeptidase-like 13	serine carboxypeptidase-like 13 (SCPL13); FUNCTIONS IN: serine-type carboxypeptidase activity; INVOLVED IN: proteolysis; LOCATED IN: endomembrane system; EXPRESSED IN: 23 plant structures; EXPRESSED DURING: 13 growth stages; CONTAINS InterPro DOMAIN/s: Peptidase S10, serine carboxypeptidase (InterPro:IPR001563); BEST Arabidopsis thaliana protein match is: serine carboxypeptidase-like 11 (TAIR:AT2…	Alpha/Beta hydrolase fold | Peptidase S10, serine carboxypeptidase	NO
AT2G22980	23	2:9780904-9780990	+	RI	0.13014	0.004703	0.12544	1	K4	2.0584	serine carboxypeptidase-like 13	serine carboxypeptidase-like 13 (SCPL13); FUNCTIONS IN: serine-type carboxypeptidase activity; INVOLVED IN: proteolysis; LOCATED IN: endomembrane system; EXPRESSED IN: 23 plant structures; EXPRESSED DURING: 13 growth stages; CONTAINS InterPro DOMAIN/s: Peptidase S10, serine carboxypeptidase (InterPro:IPR001563); BEST Arabidopsis thaliana protein match is: serine carboxypeptidase-like 11 (TAIR:AT2…	Alpha/Beta hydrolase fold | Peptidase S10, serine carboxypeptidase	NO
AT2G22980	25	2:9781060-9781165	+	RI	0.14103	0.013576	0.12745	1	K4	2.1553	serine carboxypeptidase-like 13	serine carboxypeptidase-like 13 (SCPL13); FUNCTIONS IN: serine-type carboxypeptidase activity; INVOLVED IN: proteolysis; LOCATED IN: endomembrane system; EXPRESSED IN: 23 plant structures; EXPRESSED DURING: 13 growth stages; CONTAINS InterPro DOMAIN/s: Peptidase S10, serine carboxypeptidase (InterPro:IPR001563); BEST Arabidopsis thaliana protein match is: serine carboxypeptidase-like 11 (TAIR:AT2…	Alpha/Beta hydrolase fold | Peptidase S10, serine carboxypeptidase	NO
AT2G23200	2	2:9881468-9881595	+	RI	0.58713	0.74171	-0.15457	0.992	K1	0.9877	Protein kinase superfamily protein	Protein kinase superfamily protein; FUNCTIONS IN: kinase activity; INVOLVED IN: protein amino acid phosphorylation; LOCATED IN: endomembrane system; EXPRESSED IN: 20 plant structures; EXPRESSED DURING: 12 growth stages; CONTAINS InterPro DOMAIN/s: Protein kinase, ATP binding site (InterPro:IPR017441), Protein kinase, catalytic domain (InterPro:IPR000719), Serine-threonine/tyrosine-protein kinase …	Concanavalin A-like lectin/glucanase, subgroup | Malectin-like carbohydrate-binding domain | Protein kinase domain | Protein kinase, ATP binding site | Protein kinase-like domain | Serine-threonine/tyrosine-protein kinase catalytic domain | Serine/threonine-protein kinase, active site	NO
AT2G23330	5	2:9929382-9929456	-	RI	0.90908	0.65	0.25908	0.955	K1	0.999	transposable element gene	copia-like retrotransposon family, has a 3.9e-195 P-value blast match to GB:AAA57005 Hopscotch polyprotein (Ty1_Copia-element) (Zea mays)	GAG-pre-integrase domain | Gag-polypeptide of LTR copia-type | Integrase, catalytic core | Reverse transcriptase, RNA-dependent DNA polymerase | Ribonuclease H-like domain	NO
AT2G23370	19	2:9953404-9953489	-	RI	0.20787	0.048971	0.1589	0.99	K1	0.7817		unknown protein; BEST Arabidopsis thaliana protein match is: unknown protein (TAIR:AT4G34090.1)		NO
AT2G23470	23	2:9999484-9999557	-	RI	0.38163	0.15471	0.22692	0.952	K1	0.994	Protein of unknown function, DUF647	ROOT UV-B SENSITIVE 4 (RUS4); CONTAINS InterPro DOMAIN/s: Protein of unknown function DUF647 (InterPro:IPR006968); BEST Arabidopsis thaliana protein match is: Protein of unknown function, DUF647 (TAIR:AT5G49820.1)	Vitamin B6 photo-protection and homoeostasis	NO
AT2G23790	5	2:10126151-10126660	-	AA	0.86788	0.71502	0.15286	1	K2	1.5786	Protein of unknown function (DUF607)	Protein of unknown function (DUF607); CONTAINS InterPro DOMAIN/s: Protein of unknown function DUF607 (InterPro:IPR006769); BEST Arabidopsis thaliana protein match is: Protein of unknown function (DUF607) (TAIR:AT4G36820.1)	Coiled-coil domain containing protein 109, C-terminal	NO
AT2G23790	4	2:10126661-10126903	-	RI	0.23983	0.34854	-0.10872	0.93	K2	1.5786	Protein of unknown function (DUF607)	Protein of unknown function (DUF607); CONTAINS InterPro DOMAIN/s: Protein of unknown function DUF607 (InterPro:IPR006769); BEST Arabidopsis thaliana protein match is: Protein of unknown function (DUF607) (TAIR:AT4G36820.1)	Coiled-coil domain containing protein 109, C-terminal	NO
AT2G24150	5	2:10267023-10267109	-	RI	0.16275	0.054431	0.10831	0.994	K1	0.6556	heptahelical protein 3	heptahelical protein 3 (HHP3); FUNCTIONS IN: receptor activity; INVOLVED IN: response to oxidative stress, response to hormone stimulus, response to sucrose stimulus; LOCATED IN: integral to membrane; EXPRESSED IN: 23 plant structures; EXPRESSED DURING: 13 growth stages; CONTAINS InterPro DOMAIN/s: Hly-III related (InterPro:IPR004254); BEST Arabidopsis thaliana protein match is: heptahelical tran…	Hly-III-related	NO
AT2G24190	9	2:10284366-10284440	-	RI	0.33292	0.12244	0.21047	0.9	K2	1.5024	NAD(P)-binding Rossmann-fold superfamily protein	NAD(P)-binding Rossmann-fold superfamily protein; FUNCTIONS IN: oxidoreductase activity, binding, catalytic activity; INVOLVED IN: oxidation reduction, metabolic process; LOCATED IN: cellular_component unknown; EXPRESSED IN: 22 plant structures; EXPRESSED DURING: 13 growth stages; CONTAINS InterPro DOMAIN/s: NAD(P)-binding domain (InterPro:IPR016040), Glucose/ribitol dehydrogenase (InterPro:IPR00…	Glucose/ribitol dehydrogenase | NAD(P)-binding domain | Short-chain dehydrogenase/reductase SDR	NO
AT2G24395	2	2:10375671-10375750	+	RI	0.13633	0.019135	0.11719	0.999	K1	0.5969	chaperone protein dnaJ-related	chaperone protein dnaJ-related; FUNCTIONS IN: molecular_function unknown; INVOLVED IN: biological_process unknown; LOCATED IN: chloroplast		NO
AT2G24530	7	2:10423815-10423892	+	RI	0.9629	0.71238	0.25052	0.989	K2	0.9774		unknown protein; BEST Arabidopsis thaliana protein match is: unknown protein (TAIR:AT4G31440.1)	Transcriptional coactivator Hfi1/Transcriptional adapter 1	NO
AT2G25050	35	2:10654251-10654401	-	RI	0.20246	0.47802	-0.27557	0.999	K1	0.9986	Actin-binding FH2 (Formin Homology) protein	Actin-binding FH2 (Formin Homology) protein; FUNCTIONS IN: actin binding; INVOLVED IN: cellular component organization, actin cytoskeleton organization; CONTAINS InterPro DOMAIN/s: Actin-binding FH2/DRF autoregulatory (InterPro:IPR003104), C2 calcium/lipid-binding domain, CaLB (InterPro:IPR008973), Actin-binding FH2 (InterPro:IPR015425), Tensin phosphatase, C2 domain (InterPro:IPR014020); BEST Ar…	C2 domain | Formin, FH2 domain | Protein-tyrosine phosphatase-like | Tensin phosphatase, C2 domain	NO
AT2G25050	33	2:10654469-10654582	-	RI	0.27262	0.43362	-0.161	0.932	K1	0.9984	Actin-binding FH2 (Formin Homology) protein	Actin-binding FH2 (Formin Homology) protein; FUNCTIONS IN: actin binding; INVOLVED IN: cellular component organization, actin cytoskeleton organization; CONTAINS InterPro DOMAIN/s: Actin-binding FH2/DRF autoregulatory (InterPro:IPR003104), C2 calcium/lipid-binding domain, CaLB (InterPro:IPR008973), Actin-binding FH2 (InterPro:IPR015425), Tensin phosphatase, C2 domain (InterPro:IPR014020); BEST Ar…	C2 domain | Formin, FH2 domain | Protein-tyrosine phosphatase-like | Tensin phosphatase, C2 domain	NO
AT2G25050	31	2:10654652-10654740	-	RI	0.13878	0.26658	-0.1278	0.903	K1	0.9004	Actin-binding FH2 (Formin Homology) protein	Actin-binding FH2 (Formin Homology) protein; FUNCTIONS IN: actin binding; INVOLVED IN: cellular component organization, actin cytoskeleton organization; CONTAINS InterPro DOMAIN/s: Actin-binding FH2/DRF autoregulatory (InterPro:IPR003104), C2 calcium/lipid-binding domain, CaLB (InterPro:IPR008973), Actin-binding FH2 (InterPro:IPR015425), Tensin phosphatase, C2 domain (InterPro:IPR014020); BEST Ar…	C2 domain | Formin, FH2 domain | Protein-tyrosine phosphatase-like | Tensin phosphatase, C2 domain	NO
AT2G25170	2	2:10713828-10714023	+	AD	0.044922	0.17133	-0.12641	0.959	K1	0.7219	chromatin remodeling factor CHD3 (PICKLE)	PICKLE (PKL); CONTAINS InterPro DOMAIN/s: Protein of unknown function DUF1087 (InterPro:IPR009463), Zinc finger, RING-type (InterPro:IPR001841), Zinc finger, PHD-type, conserved site (InterPro:IPR019786), Zinc finger, PHD-type (InterPro:IPR001965), Protein of unknown function DUF1086 (InterPro:IPR009462), Chromo domain (InterPro:IPR000953), SNF2-related (InterPro:IPR000330), DEAD-like helicase, N…	Chromo domain | Chromo domain-like | Chromo domain/shadow | Domain of unknown function DUF1086 | Domain of unknown function DUF1087 | Helicase, C-terminal | Helicase, superfamily 1/2, ATP-binding domain | P-loop containing nucleoside triphosphate hydrolase | SNF2-related | Zinc finger, PHD-finger | Zinc finger, PHD-type | Zinc finger, PHD-type, conserved site | Zinc finger, RING-type | Zinc finge…	NO
AT2G25290	5	2:10766075-10766143	-	RI	0.3757	0.11352	0.26218	0.961	K2	1.5726	Octicosapeptide/Phox/Bem1p (PB1) domain-containing protein / tetratricopeptide repeat (TPR)-containing protein	Octicosapeptide/Phox/Bem1p (PB1) domain-containing protein / tetratricopeptide repeat (TPR)-containing protein; FUNCTIONS IN: binding; INVOLVED IN: biological_process unknown; LOCATED IN: cellular_component unknown; CONTAINS InterPro DOMAIN/s: Octicosapeptide/Phox/Bem1p (InterPro:IPR000270), Tetratricopeptide-like helical (InterPro:IPR011990), Tetratricopeptide repeat-containing (InterPro:IPR0130…	Phox/Bem1p | Tetratricopeptide repeat | Tetratricopeptide repeat-containing domain | Tetratricopeptide-like helical domain	NO
AT2G25320	18	2:10783024-10783126	-	RI	0.15085	0.027712	0.12314	0.993	K1	0.6868	TRAF-like family protein	TRAF-like family protein; LOCATED IN: chloroplast; CONTAINS InterPro DOMAIN/s: TRAF-like (InterPro:IPR008974), MATH (InterPro:IPR002083); BEST Arabidopsis thaliana protein match is: TRAF-like family protein (TAIR:AT2G25330.1)	Armadillo-type fold | MATH | TRAF-like	NO
AT2G25530	9	2:10864866-10864912	+	AA	0.74446	0.89049	-0.14603	0.902	K1	0.8767	AFG1-like ATPase family protein	AFG1-like ATPase family protein; FUNCTIONS IN: ATPase activity, ATP binding; INVOLVED IN: biological_process unknown; LOCATED IN: cellular_component unknown; EXPRESSED IN: 23 plant structures; EXPRESSED DURING: 14 growth stages; CONTAINS InterPro DOMAIN/s: ATPase, AFG1-like (InterPro:IPR005654); BEST Arabidopsis thaliana protein match is: AFG1-like ATPase family protein (TAIR:AT4G28070.2)	ATPase, AFG1-like | P-loop containing nucleoside triphosphate hydrolase	NO
AT2G25590	14	2:10891383-10891452	+	EI/RI	0.58106	0.31977	0.26129	0.952	K1	0.9998	Plant Tudor-like protein	Plant Tudor-like protein; FUNCTIONS IN: RNA binding; INVOLVED IN: biological_process unknown; EXPRESSED IN: 24 plant structures; EXPRESSED DURING: 14 growth stages; CONTAINS InterPro DOMAIN/s: Tudor-like, plant (InterPro:IPR014002), Agenet (InterPro:IPR008395); BEST Arabidopsis thaliana protein match is: Plant Tudor-like RNA-binding protein (TAIR:AT4G32440.3)	Agenet-like domain | Tudor-like, plant	NO
AT2G25590	14	2:10891383-10891452	+	RI	0.58106	0.31977	0.26129	0.952	K1	0.9998	Plant Tudor-like protein	Plant Tudor-like protein; FUNCTIONS IN: RNA binding; INVOLVED IN: biological_process unknown; EXPRESSED IN: 24 plant structures; EXPRESSED DURING: 14 growth stages; CONTAINS InterPro DOMAIN/s: Tudor-like, plant (InterPro:IPR014002), Agenet (InterPro:IPR008395); BEST Arabidopsis thaliana protein match is: Plant Tudor-like RNA-binding protein (TAIR:AT4G32440.3)	Agenet-like domain | Tudor-like, plant	NO
AT2G25590	33	2:10893217-10893300	+	RI	0.29809	0.15205	0.14604	0.927	K1	0.971	Plant Tudor-like protein	Plant Tudor-like protein; FUNCTIONS IN: RNA binding; INVOLVED IN: biological_process unknown; EXPRESSED IN: 24 plant structures; EXPRESSED DURING: 14 growth stages; CONTAINS InterPro DOMAIN/s: Tudor-like, plant (InterPro:IPR014002), Agenet (InterPro:IPR008395); BEST Arabidopsis thaliana protein match is: Plant Tudor-like RNA-binding protein (TAIR:AT4G32440.3)	Agenet-like domain | Tudor-like, plant	NO
AT2G25737	19	2:10979090-10979168	+	RI	0.25673	0.11651	0.14023	0.917	K1	0.8828	Sulfite exporter TauE/SafE family protein	Sulfite exporter TauE/SafE family protein; LOCATED IN: endomembrane system, integral to membrane; CONTAINS InterPro DOMAIN/s: Protein of unknown function DUF81 (InterPro:IPR002781); BEST Arabidopsis thaliana protein match is: Sulfite exporter TauE/SafE family protein (TAIR:AT2G36630.1)	Transmembrane protein TauE like	NO
AT2G25760	12	2:10987425-10987574	-	RI	0.12379	0.25593	-0.13213	0.967	K2	0.9112	Protein kinase family protein	Protein kinase family protein; FUNCTIONS IN: protein serine/threonine kinase activity, protein kinase activity, kinase activity, ATP binding; INVOLVED IN: protein amino acid phosphorylation; EXPRESSED IN: 22 plant structures; EXPRESSED DURING: 13 growth stages; CONTAINS InterPro DOMAIN/s: Protein kinase, ATP binding site (InterPro:IPR017441), Protein kinase, catalytic domain (InterPro:IPR000719),…	Protein kinase domain | Protein kinase, ATP binding site | Protein kinase-like domain | Serine/threonine-protein kinase, active site	NO
AT2G25850	16	2:11026243-11026458	-	AA	0.029253	0.15339	-0.12414	0.997	K1	0.6887	poly(A) polymerase 2	poly(A) polymerase 2 (PAPS2); CONTAINS InterPro DOMAIN/s: Poly(A) polymerase (InterPro:IPR014492), Nucleotidyltransferase, class I, C-terminal-like (InterPro:IPR011068), Poly(A) polymerase, central domain (InterPro:IPR007012), Nucleotidyl transferase domain (InterPro:IPR002934), Poly(A) polymerase, RNA-binding domain (InterPro:IPR007010); CONTAINS InterPro DOMAIN/s: Poly(A) polymerase (InterPro:I…	Nucleotidyl transferase domain | Nucleotidyltransferase, class I, C-terminal-like | Poly(A) polymerase | Poly(A) polymerase, RNA-binding domain | Poly(A) polymerase, central domain	NO
AT2G25850	24	2:11026459-11026619	-	RI	0.030753	0.26982	-0.23907	1	K2	0.9843	poly(A) polymerase 2	poly(A) polymerase 2 (PAPS2); CONTAINS InterPro DOMAIN/s: Poly(A) polymerase (InterPro:IPR014492), Nucleotidyltransferase, class I, C-terminal-like (InterPro:IPR011068), Poly(A) polymerase, central domain (InterPro:IPR007012), Nucleotidyl transferase domain (InterPro:IPR002934), Poly(A) polymerase, RNA-binding domain (InterPro:IPR007010); CONTAINS InterPro DOMAIN/s: Poly(A) polymerase (InterPro:I…	Nucleotidyl transferase domain | Nucleotidyltransferase, class I, C-terminal-like | Poly(A) polymerase | Poly(A) polymerase, RNA-binding domain | Poly(A) polymerase, central domain	NO
AT2G25930	7	2:11061687-11061766	+	RI	0.29278	0.44997	-0.15719	0.923	K2	1.5586	hydroxyproline-rich glycoprotein family protein	EARLY FLOWERING 3 (ELF3); BEST Arabidopsis thaliana protein match is: unknown protein (TAIR:AT3G21320.1)		NO
AT2G26210	8	2:11157616-11157619	+	AA	0.74434	0.6395	0.10484	0.978	K4	2.5597	Ankyrin repeat family protein	Ankyrin repeat family protein; INVOLVED IN: biological_process unknown; LOCATED IN: cellular_component unknown; EXPRESSED IN: 20 plant structures; EXPRESSED DURING: 10 growth stages; CONTAINS InterPro DOMAIN/s: Ankyrin repeat-containing domain (InterPro:IPR020683), Ankyrin repeat (InterPro:IPR002110)	Ankyrin repeat | Ankyrin repeat-containing domain	NO
AT2G26210	14	2:11157763-11157821	+	AD	0.72054	0.90348	-0.18294	1	K5	2.6084	Ankyrin repeat family protein	Ankyrin repeat family protein; INVOLVED IN: biological_process unknown; LOCATED IN: cellular_component unknown; EXPRESSED IN: 20 plant structures; EXPRESSED DURING: 10 growth stages; CONTAINS InterPro DOMAIN/s: Ankyrin repeat-containing domain (InterPro:IPR020683), Ankyrin repeat (InterPro:IPR002110)	Ankyrin repeat | Ankyrin repeat-containing domain	NO
AT2G26280	4	2:11191096-11191159	-	CE	0.74035	0.60634	0.13401	0.978	K2	1.3057	CTC-interacting domain 7	CID7; FUNCTIONS IN: damaged DNA binding, protein binding, ATP binding; INVOLVED IN: mismatch repair; LOCATED IN: chloroplast; EXPRESSED IN: 22 plant structures; EXPRESSED DURING: 13 growth stages; CONTAINS InterPro DOMAIN/s: Smr protein/MutS2 C-terminal (InterPro:IPR002625), Region of unknown function DUF1771 (InterPro:IPR013899); BEST Arabidopsis thaliana protein match is: PRLI-interacting facto…	Domain of unknown function DUF1771 | Smr protein/MutS2 C-terminal	NO
AT2G26280	3	2:11191160-11191236	-	RI	0.74302	0.54305	0.19997	0.999	K3	1.3803	CTC-interacting domain 7	CID7; FUNCTIONS IN: damaged DNA binding, protein binding, ATP binding; INVOLVED IN: mismatch repair; LOCATED IN: chloroplast; EXPRESSED IN: 22 plant structures; EXPRESSED DURING: 13 growth stages; CONTAINS InterPro DOMAIN/s: Smr protein/MutS2 C-terminal (InterPro:IPR002625), Region of unknown function DUF1771 (InterPro:IPR013899); BEST Arabidopsis thaliana protein match is: PRLI-interacting facto…	Domain of unknown function DUF1771 | Smr protein/MutS2 C-terminal	NO
AT2G26300	12	2:11198796-11198873	+	CE	0.82719	0.96724	-0.14005	1	K1	0.7185	G protein alpha subunit 1	G protein alpha subunit 1 (GP ALPHA 1); FUNCTIONS IN: in 6 functions; INVOLVED IN: in 16 processes; LOCATED IN: plasma membrane, endoplasmic reticulum membrane, heterotrimeric G-protein complex; EXPRESSED IN: 25 plant structures; EXPRESSED DURING: 13 growth stages; CONTAINS InterPro DOMAIN/s: Plant G-protein, alpha subunit (InterPro:IPR002976), Guanine nucleotide binding protein (G-protein), alph…	G protein alpha subunit, helical insertion | Guanine nucleotide binding protein (G-protein), alpha subunit | P-loop containing nucleoside triphosphate hydrolase | Plant G-protein, alpha subunit	NO
AT2G26511	4	2:11278323-11278384	+	CE	0.44252	0.76297	-0.32044	0.923	K3	1.93		unknown protein		NO
AT2G26590	13	2:11314012-11314251	-	RI	0.18644	0.021043	0.1654	0.999	K1	0.7199	regulatory particle non-ATPase 13	regulatory particle non-ATPase 13 (RPN13); FUNCTIONS IN: molecular_function unknown; INVOLVED IN: cell adhesion; LOCATED IN: integral to membrane, nucleus, cytoplasm; EXPRESSED IN: 23 plant structures; EXPRESSED DURING: 13 growth stages; CONTAINS InterPro DOMAIN/s: 26S proteasome complex ubiquitin receptor, subunit Rpn13 (InterPro:IPR006773)	26S proteasome complex ubiquitin receptor, subunit Rpn13	NO
AT2G26810	9	2:11435964-11435986	-	AD	0.18372	0.49692	-0.3132	0.99	K2	1.5827	Putative methyltransferase family protein	Putative methyltransferase family protein; FUNCTIONS IN: molecular_function unknown; INVOLVED IN: biological_process unknown; LOCATED IN: cellular_component unknown; EXPRESSED IN: 21 plant structures; EXPRESSED DURING: 13 growth stages; CONTAINS InterPro DOMAIN/s: Methyltransferase-16, putative (InterPro:IPR019410); BEST Arabidopsis thaliana protein match is: S-adenosyl-L-methionine-dependent met…	Nicotinamide N-methyltransferase-like | S-adenosyl-L-methionine-dependent methyltransferase-like	NO
AT2G26890	10	2:11471968-11471977	-	AA	0.31912	0.10285	0.21627	0.913	K1	0.9799	DNAJ heat shock N-terminal domain-containing protein	GRAVITROPISM DEFECTIVE 2 (GRV2); FUNCTIONS IN: binding, heat shock protein binding; INVOLVED IN: in 10 processes; LOCATED IN: in 6 components; EXPRESSED IN: 30 plant structures; EXPRESSED DURING: 14 growth stages; CONTAINS InterPro DOMAIN/s: Molecular chaperone, heat shock protein, Hsp40, DnaJ (InterPro:IPR015609), Heat shock protein DnaJ, N-terminal (InterPro:IPR001623), Armadillo-type fold (Int…	Armadillo-like helical | Armadillo-type fold | DnaJ domain	NO
AT2G26980	27	2:11515620-11515637	-	AA	0.22016	0.056021	0.16414	1	K2	0.8482	CBL-interacting protein kinase 3	CBL-interacting protein kinase 3 (CIPK3); CONTAINS InterPro DOMAIN/s: Protein kinase, ATP binding site (InterPro:IPR017441), Serine/threonine-protein kinase domain (InterPro:IPR002290), NAF/FISL domain (InterPro:IPR018451), Serine/threonine-protein kinase-like domain (InterPro:IPR017442), Protein kinase-like domain (InterPro:IPR011009), Serine/threonine-protein kinase, active site (InterPro:IPR00…	NAF domain | NAF/FISL domain | Protein kinase domain | Protein kinase, ATP binding site | Protein kinase-like domain | Serine/threonine-protein kinase, active site | Serine/threonine/dual specificity protein kinase, catalytic domain	NO
AT2G26980	22	2:11516427-11516480	-	CE	0.24873	0.45313	-0.2044	0.999	K3	1.6328	CBL-interacting protein kinase 3	CBL-interacting protein kinase 3 (CIPK3); CONTAINS InterPro DOMAIN/s: Protein kinase, ATP binding site (InterPro:IPR017441), Serine/threonine-protein kinase domain (InterPro:IPR002290), NAF/FISL domain (InterPro:IPR018451), Serine/threonine-protein kinase-like domain (InterPro:IPR017442), Protein kinase-like domain (InterPro:IPR011009), Serine/threonine-protein kinase, active site (InterPro:IPR00…	NAF domain | NAF/FISL domain | Protein kinase domain | Protein kinase, ATP binding site | Protein kinase-like domain | Serine/threonine-protein kinase, active site | Serine/threonine/dual specificity protein kinase, catalytic domain	NO
AT2G26980	36	2:11515638-11515703	-	RI	0.21915	0.054495	0.16466	1	K2	0.8507	CBL-interacting protein kinase 3	CBL-interacting protein kinase 3 (CIPK3); CONTAINS InterPro DOMAIN/s: Protein kinase, ATP binding site (InterPro:IPR017441), Serine/threonine-protein kinase domain (InterPro:IPR002290), NAF/FISL domain (InterPro:IPR018451), Serine/threonine-protein kinase-like domain (InterPro:IPR017442), Protein kinase-like domain (InterPro:IPR011009), Serine/threonine-protein kinase, active site (InterPro:IPR00…	NAF domain | NAF/FISL domain | Protein kinase domain | Protein kinase, ATP binding site | Protein kinase-like domain | Serine/threonine-protein kinase, active site | Serine/threonine/dual specificity protein kinase, catalytic domain	NO
AT2G27150	12	2:11604306-11604383	+	RI	0.15724	0.045277	0.11196	0.987	K6	3.2202	abscisic aldehyde oxidase 3	abscisic aldehyde oxidase 3 (AAO3); CONTAINS InterPro DOMAIN/s: Aldehyde oxidase/xanthine dehydrogenase (InterPro:IPR016208), Ferredoxin (InterPro:IPR001041), Molybdopterin dehydrogenase, FAD-binding (InterPro:IPR002346), [2Fe-2S]-binding (InterPro:IPR002888), FAD-binding, type 2 (InterPro:IPR016166), CO dehydrogenase flavoprotein, C-terminal (InterPro:IPR005107), 2Fe-2S ferredoxin, iron-sulphur …	2Fe-2S ferredoxin, iron-sulphur binding site | 2Fe-2S ferredoxin-type domain | Aldehyde oxidase/xanthine dehydrogenase | Aldehyde oxidase/xanthine dehydrogenase, a/b hammerhead | Aldehyde oxidase/xanthine dehydrogenase, molybdopterin binding | Beta-grasp domain | CO dehydrogenase flavoprotein, C-terminal | CO dehydrogenase flavoprotein-like, FAD-binding, subdomain 2 | FAD-binding, type 2 | Molybd…	NO
AT2G27340	6	2:11697164-11697448	+	RI	0.52237	0.65795	-0.13558	0.916	K4	1.4673	N-acetylglucosaminylphosphatidylinositol de-N-acetylase family protein	N-acetylglucosaminylphosphatidylinositol de-N-acetylase family protein; FUNCTIONS IN: molecular_function unknown; INVOLVED IN: biological_process unknown; LOCATED IN: endomembrane system; CONTAINS InterPro DOMAIN/s: N-acetylglucosaminyl phosphatidylinositol deacetylase (InterPro:IPR003737); BEST Arabidopsis thaliana protein match is: N-acetylglucosaminylphosphatidylinositol de-N-acetylase family …	N-acetylglucosaminyl phosphatidylinositol deacetylase-related | Putative deacetylase LmbE-like domain	NO
AT2G27400	3	2:11721729-11722300	-	RI	0.62212	0.41505	0.20707	0.997	K1	0.9839	TAS1A; other RNA			NO
AT2G27480	6	2:11747285-11747392	+	RI	0.35745	0.55104	-0.19359	0.906	K1	0.9998	Calcium-binding EF-hand family protein	Calcium-binding EF-hand family protein; FUNCTIONS IN: calcium ion binding; INVOLVED IN: biological_process unknown; LOCATED IN: cellular_component unknown; EXPRESSED IN: stem; CONTAINS InterPro DOMAIN/s: EF-Hand 1, calcium-binding site (InterPro:IPR018247), EF-HAND 2 (InterPro:IPR018249), EF-hand-like domain (InterPro:IPR011992), Calcium-binding EF-hand (InterPro:IPR002048); BEST Arabidopsis thal…	EF-Hand 1, calcium-binding site | EF-hand domain | EF-hand domain pair	NO
AT2G28290	94	2:12072241-12072333	+	EI/RI	0.24321	0.062029	0.18118	1	K6	2.8751	P-loop containing nucleoside triphosphate hydrolases superfamily protein	SPLAYED (SYD); CONTAINS InterPro DOMAIN/s: DEAD-like helicase, N-terminal (InterPro:IPR014001), DNA/RNA helicase, C-terminal (InterPro:IPR001650), Helicase/SANT-associated, DNA binding (InterPro:IPR014012), Helicase, superfamily 1/2, ATP-binding domain (InterPro:IPR014021), SNF2-related (InterPro:IPR000330); BEST Arabidopsis thaliana protein match is: Homeotic gene regulator (TAIR:AT3G06010.1)	Glutamine-Leucine-Glutamine, QLQ | Helicase, C-terminal | Helicase, superfamily 1/2, ATP-binding domain | Helicase/SANT-associated, DNA binding | P-loop containing nucleoside triphosphate hydrolase | SNF2-related | Snf2 ATP coupling domain	NO
AT2G28290	94	2:12072241-12072333	+	RI	0.24321	0.062029	0.18118	1	K6	2.8751	P-loop containing nucleoside triphosphate hydrolases superfamily protein	SPLAYED (SYD); CONTAINS InterPro DOMAIN/s: DEAD-like helicase, N-terminal (InterPro:IPR014001), DNA/RNA helicase, C-terminal (InterPro:IPR001650), Helicase/SANT-associated, DNA binding (InterPro:IPR014012), Helicase, superfamily 1/2, ATP-binding domain (InterPro:IPR014021), SNF2-related (InterPro:IPR000330); BEST Arabidopsis thaliana protein match is: Homeotic gene regulator (TAIR:AT3G06010.1)	Glutamine-Leucine-Glutamine, QLQ | Helicase, C-terminal | Helicase, superfamily 1/2, ATP-binding domain | Helicase/SANT-associated, DNA binding | P-loop containing nucleoside triphosphate hydrolase | SNF2-related | Snf2 ATP coupling domain	NO
AT2G28470	6	2:12173299-12173402	-	RI	0.68644	0.47169	0.21476	0.999	K3	1.5067	beta-galactosidase 8	beta-galactosidase 8 (BGAL8); FUNCTIONS IN: cation binding, sugar binding, beta-galactosidase activity, hydrolase activity, hydrolyzing O-glycosyl compounds, catalytic activity; INVOLVED IN: carbohydrate metabolic process; EXPRESSED IN: 26 plant structures; LOCATED IN: cell wall; EXPRESSED DURING: 13 growth stages; CONTAINS InterPro DOMAIN/s: Glycoside hydrolase, family 35, conserved site (InterP…	D-galactoside/L-rhamnose binding SUEL lectin domain | Galactose-binding domain-like | Glycoside hydrolase, catalytic domain | Glycoside hydrolase, family 35 | Glycoside hydrolase, family 35, conserved site | Glycoside hydrolase, superfamily	NO
AT2G28550	12	2:12226969-12227013	-	CE	0.13731	0.30848	-0.17116	1	K3	1.5557	related to AP2.7	related to AP2.7 (RAP2.7); CONTAINS InterPro DOMAIN/s: DNA-binding, integrase-type (InterPro:IPR016177), Pathogenesis-related transcriptional factor/ERF, DNA-binding (InterPro:IPR001471); BEST Arabidopsis thaliana protein match is: target of early activation tagged (EAT) 2 (TAIR:AT5G60120.1)	AP2/ERF domain | DNA-binding domain	NO
AT2G28550	16	2:12226862-12226968	-	RI	0.061798	0.22177	-0.15998	1	K3	1.5921	related to AP2.7	related to AP2.7 (RAP2.7); CONTAINS InterPro DOMAIN/s: DNA-binding, integrase-type (InterPro:IPR016177), Pathogenesis-related transcriptional factor/ERF, DNA-binding (InterPro:IPR001471); BEST Arabidopsis thaliana protein match is: target of early activation tagged (EAT) 2 (TAIR:AT5G60120.1)	AP2/ERF domain | DNA-binding domain	NO
AT2G28550	14	2:12227014-12227119	-	RI	0.054969	0.16209	-0.10712	0.996	K3	1.5921	related to AP2.7	related to AP2.7 (RAP2.7); CONTAINS InterPro DOMAIN/s: DNA-binding, integrase-type (InterPro:IPR016177), Pathogenesis-related transcriptional factor/ERF, DNA-binding (InterPro:IPR001471); BEST Arabidopsis thaliana protein match is: target of early activation tagged (EAT) 2 (TAIR:AT5G60120.1)	AP2/ERF domain | DNA-binding domain	NO
AT2G28570	3	2:12241871-12242048	+	RI	0.83758	0.95253	-0.11494	0.916	K1	0.8015		unknown protein		NO
AT2G28830	16	2:12367562-12367628	-	RI	0.45722	0.20557	0.25165	0.92	K1	0.9941	PLANT U-BOX 12	PLANT U-BOX 12 (PUB12); FUNCTIONS IN: ubiquitin-protein ligase activity, structural constituent of ribosome, rRNA binding, binding; INVOLVED IN: response to chitin; LOCATED IN: ubiquitin ligase complex, ribosome, intracellular; EXPRESSED IN: 21 plant structures; EXPRESSED DURING: 9 growth stages; CONTAINS InterPro DOMAIN/s: Ribosomal protein L16 (InterPro:IPR000114), U box domain (InterPro:IPR003…		NO
AT2G28880	18	2:12400760-12400797	-	AD	0.49219	0.30252	0.18968	0.932	K1	0.9986	para-aminobenzoate (PABA) synthase family protein	embryo defective 1997 (emb1997); FUNCTIONS IN: oxo-acid-lyase activity, catalytic activity, anthranilate synthase activity; INVOLVED IN: embryo development ending in seed dormancy; LOCATED IN: chloroplast; EXPRESSED IN: 20 plant structures; EXPRESSED DURING: 6 growth stages; CONTAINS InterPro DOMAIN/s: Glutamine amidotransferase class-I, C-terminal (InterPro:IPR000991), Glutamine amidotransferase…	ADC synthase | Anthranilate synthase component I, N-terminal | Chorismate binding, C-terminal | Class I glutamine amidotransferase-like | Glutamine amidotransferase | Para-aminobenzoate synthase, component I	NO
AT2G29340	10	2:12598301-12598306	+	AD	0.73247	0.87587	-0.1434	0.998	K2	1.5068	NAD-dependent epimerase/dehydratase family protein	NAD-dependent epimerase/dehydratase family protein; FUNCTIONS IN: oxidoreductase activity, binding, catalytic activity; INVOLVED IN: oxidation reduction, metabolic process; EXPRESSED IN: 22 plant structures; EXPRESSED DURING: 13 growth stages; CONTAINS InterPro DOMAIN/s: NAD(P)-binding domain (InterPro:IPR016040), Glucose/ribitol dehydrogenase (InterPro:IPR002347), Short-chain dehydrogenase/reduc…	Glucose/ribitol dehydrogenase | NAD(P)-binding domain | Short-chain dehydrogenase/reductase SDR	NO
AT2G29340	17	2:12598312-12598868	+	RI	0.595	0.79093	-0.19593	0.992	K2	1.5068	NAD-dependent epimerase/dehydratase family protein	NAD-dependent epimerase/dehydratase family protein; FUNCTIONS IN: oxidoreductase activity, binding, catalytic activity; INVOLVED IN: oxidation reduction, metabolic process; EXPRESSED IN: 22 plant structures; EXPRESSED DURING: 13 growth stages; CONTAINS InterPro DOMAIN/s: NAD(P)-binding domain (InterPro:IPR016040), Glucose/ribitol dehydrogenase (InterPro:IPR002347), Short-chain dehydrogenase/reduc…	Glucose/ribitol dehydrogenase | NAD(P)-binding domain | Short-chain dehydrogenase/reductase SDR	NO
AT2G29640	6	2:12672363-12672679	+	AD	0.33286	0.10704	0.22582	0.906	K1	0.9911	JOSEPHIN-like protein	JOSEPHIN-like protein (JOSL); CONTAINS InterPro DOMAIN/s: Machado-Joseph disease protein MJD (InterPro:IPR006155); BEST Arabidopsis thaliana protein match is: josephin protein-related (TAIR:AT1G07300.1)	Machado-Joseph disease protein MJD	NO
[truncated: 1,427 more rows]

## Sheet: GO_smfa_DAS_C
Term Name	GOID	Term Type	Depth	cnt(reference)	cnt(smfa)	fsh(smfa)
[truncated: 71 more rows]

[truncated: 10 more sheets: GO_smfa_DAS_F, GO_smfa_DAS_P, smfb, GO_smfb_DAS_C, GO_smfb_DAS_F, GO_smfb_DAS_P, Share_smfa_smfb, GO_smfa_smfb_DAS_C, GO_smfa_smfb_DAS_F, GO_smfa_smfb_DAS_P]
